# Supplementary material for: The identification of the Rosa S-locus and implications on the evolution of the Rosaceae gametophytic self-incompatibility systems
Source: PubMed Central journal article supplement (PMC7881130; doi:10.1038/s41598-021-83243-8), 2021-02-12

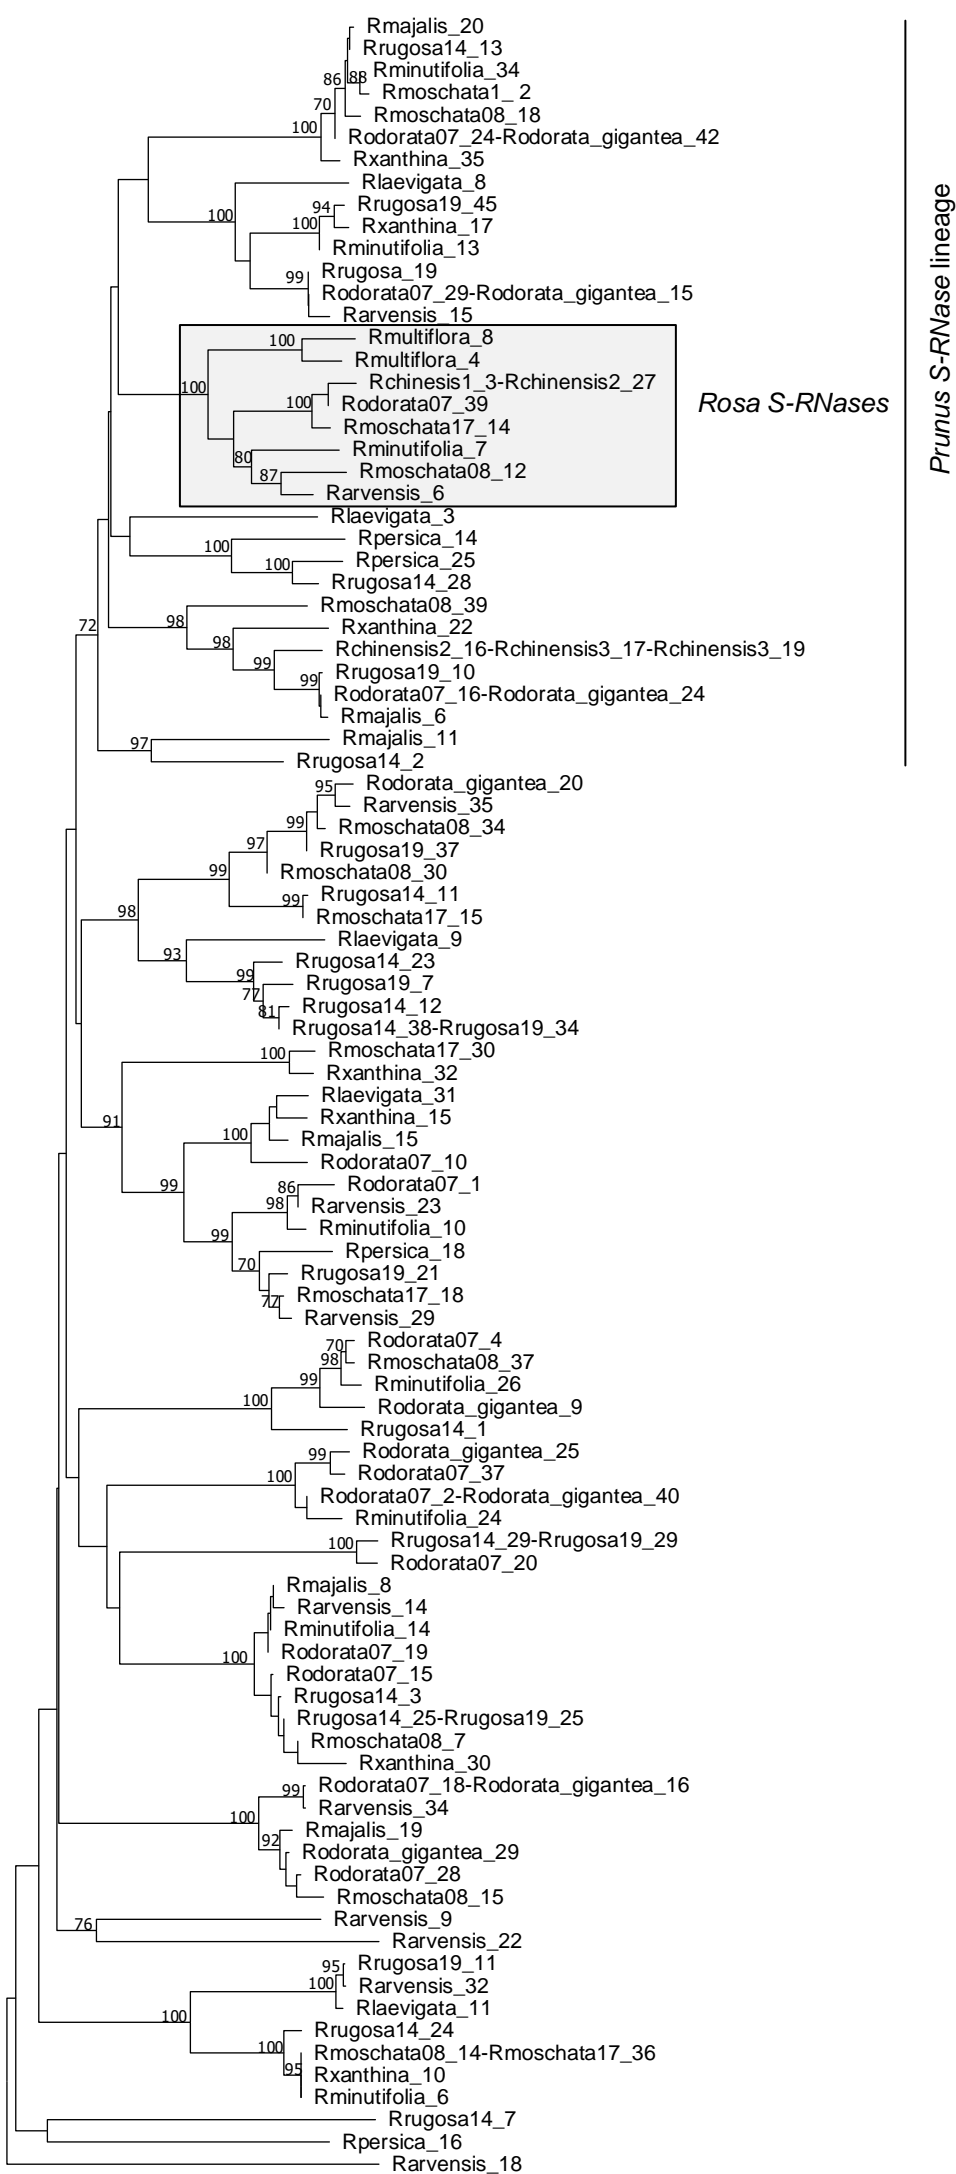

Supplement: 41598_2021_83243_MOESM1_ESM.pdf [file 41598_2021_83243_MOESM1_ESM.pdf]
