# Supplementary material for: The identification of the Rosa S-locus and implications on the evolution of the Rosaceae gametophytic self-incompatibility systems
Source: PubMed Central journal article supplement (PMC7881130; doi:10.1038/s41598-021-83243-8), 2021-02-12
Supplement: 41598_2021_83243_MOESM2_ESM.pdf [file 41598_2021_83243_MOESM2_ESM.pdf]

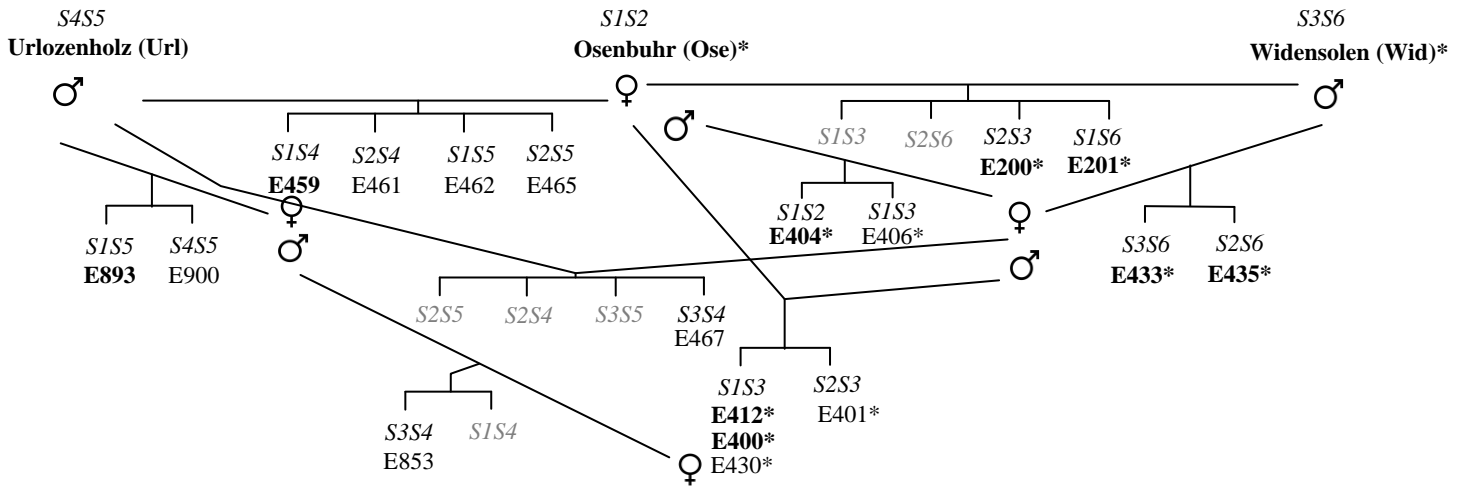

A

| S-haplotypes | Accessions (origin, date)  | Functional tests                                                                                                |
|--------------|----------------------------|-----------------------------------------------------------------------------------------------------------------|
| S1 S2        | Ose (wild collected, 1997) | founder for S1; no hips with E404; hips with Wid, Url, E200, E201, E400, E401, E406, E412, E430, E459           |
|              | E404 (E200 x Ose, 2007)    | no hips with Ose; hips with E200, E201                                                                          |
| S1 S3        | E400 (Ose x E200, 2007)    | no hips with E406, E412, E430; hips with Ose, E200, E201                                                        |
|              | E406 (E200 x Ose, 2007)    | no hips with E400, E412, E430; hips with Ose, E200, E201                                                        |
|              | E412 (Ose x E200, 2007)    | no hips with E400, E406, E430; hips with Ose, Wid, E200, E201                                                   |
|              | E430 (Ose x E200, 2007)    | no hips with E400, E406, E412; hips with Ose, E200, E459                                                        |
| S1 S4        | E459 (Ose x Url, 2012)     | founder for S4; hips with Ose, Wid, Url, E200, E201, E401, E430                                                 |
| S1 S5        | E462 (Ose x Url, 2012)     | hips with E459                                                                                                  |
|              | E893 (E459 x Url, 2017)    | not yet mature                                                                                                  |
| S1 S6        | E201 (Ose x Wid, 2003)     | hips with Ose, Wid, E200, E400, E404, E406, E412, E430, E459                                                    |
| S2 S3        | E200 (Ose x Wid, 2003)     | founder for S2 and for S3; no hips with E401; hips with Ose, Wid, Url, E201, E400, E404, E406, E412, E430, E459 |
|              | E401 (Ose x E200, 2007)    | no hips with E200; hips with Ose, Wid, Url, E201, E459                                                          |
| S2 S4        | E461 (Ose x Url, 2012)     | hips with E459                                                                                                  |
| S2 S5        | E465 (Ose x Url, 2013)     | hips with E459                                                                                                  |
| S2 S6        | E435 (E200 X Wid, 2008)    | hips with Wid, E433                                                                                             |
| S3 S4        | E853 (E430 x E459, 2016)   | not yet mature                                                                                                  |
|              | E467 (E200 x Url, 2013)    | not yet mature                                                                                                  |
| S3 S6        | Wid (wild collected, 1999) | founder for S6; no hips with E433; hips with Ose, Url, E200, E201, E412, E459                                   |
|              | E433 (E200 X Wid, 2008)    | no hips with Wid; hips with E435                                                                                |
| S4 S5        | Url (wild collected, 2000) | founder for S5; hips with Ose, Wid, E200, E459                                                                  |
|              | E900 (E459 x Url, 2018)    | not yet mature                                                                                                  |

B
