# Supplementary material for: The identification of the Rosa S-locus and implications on the evolution of the Rosaceae gametophytic self-incompatibility systems
Source: PubMed Central journal article supplement (PMC7881130; doi:10.1038/s41598-021-83243-8), 2021-02-12
Supplement: 41598_2021_83243_MOESM3_ESM.pdf [file 41598_2021_83243_MOESM3_ESM.pdf]

# **The identification of the *Rosa* S-locus and implications on the evolution of the Rosaceae gametophytic self-incompatibility systems**

Vieira J<sup>1,2</sup>, Pimenta J<sup>1,2</sup>, Gomes A<sup>1,2</sup>, Laia J<sup>1,2</sup>, Rocha S<sup>1,2</sup>, Heitzler P<sup>3</sup>, and Vieira CP<sup>1,2\*</sup>

**Supplementary Information**

**Supplementary Table 1.** Breeding system, genome accession number, quality of the assembly, and ploidy of the *Rosa* species used in this work.

**Supplementary Table 2.** Size, motif 1 and 2, and IP of the sequences identified in *R. chinensis*, *R. multiflora*, *R. moschata*, *R. levigata*, *R. rugosa*, *R. persica*, *R. xantina*, *R. minutifolia*, *R. odorata*, *R. arvensis*, and *R. majalis* genomes.

**Supplementary Table 3.** Location of the *SFB/SLFL/SFBB* like sequences of *R. chinensis* chromosome 3, *R. multiflora* sc0006888, and *R. multiflora* sc0001861.

**Supplementary Table 4.** *R. chinensis* transcriptome data used in this study.

**Supplementary Figure 1.** Neighbor-joining phylogenetic tree, showing the relationship of the *Rosa* sequences covering at least the exon where motif 2 is located, with *Fragaria*, *Prunus*, and *Malus S-RNase* lineage genes. Since not all sequences overlap, two different phylogenies were produced (A and B) using different sequence subsets aligned using the ClustalW algorithm. For phylogenetic inferences, the neighbor-joining method and pairwise deletion option was used, as implemented in Mega7<sup>64</sup>. The tree was rooted with *MDP0000267606A T2- RNase*, not involved in GSI<sup>36</sup>. Numbers below the branches represent bootstrap support values above 70.

**Supplementary Figure 2.** Neighbor-joining phylogenetic tree, showing the relationship of the *Rosa* sequences covering the region of motif 1 with those sequences identified as *Rosa S-RNases* (see Figure 1, and Supplementary Fig. 1). The tree was rooted with *MDP0000267606A T2- RNase*, not involved in GSI<sup>36</sup>. Numbers below the branches represent bootstrap support values above 70.

**Supplementary Figure 3.** *R. arvensis* *S*-haplotype inferences, according to the pedigree (A) and hand-pollination tests (B). In bold are the individuals used in this study, in grey are those *S*-haplotypes that are expected but not observed. Stars indicate those *S*-haplotypes that have been confirmed with hand-pollination tests.

**Supplementary File 1.** The *R. chinensis* and *R. multiflora S-RNase* lineage sequences together with *Fragaria*, *Prunus*, and *Malus S-RNase* lineage genes.

**Supplementary File 2.** The *Rosa* sequences covering at least the exon where motif 2 is located and those identified as *Rosa S-RNase*, *Fragaria*, *Prunus*, and *Malus S-RNase* lineage genes.

**Supplementary File 3.** The *Rosa* sequences covering region of motif 1 and those identified as *Rosa S-RNase* (see Figure 1, and Supplementary Fig. 1).

**Supplementary File 4.** The *R. chinensis* and *R. multiflora* *SFB/SLFL/SFBB* like sequences together with *Prunus* *SFB* and *SLFL* genes, *M. domestica* *S1-SFBBs*, *Petunia* and *Nicotiana* *SLF*, and *A. thaliana* F-box/kelch-repeat sequences.

**Supplementary Table 1.** Breeding system, genome accession number, quality of the assembly, and ploidy of the *Rosa* species used in this work.

| <i>Rosa</i> species             | Accession number                                                                                             | N50 of the assembly | Ploidy | Breeding system           |
|---------------------------------|--------------------------------------------------------------------------------------------------------------|---------------------|--------|---------------------------|
| <i>R. chinensis</i>             | 1- GCA_002994745.2 (assigned as Rchinensis1)                                                                 | 69643165            | 2x     | SI <sup>4</sup>           |
|                                 | 2- after Get ORF(assigned as Rchinensis2)                                                                    |                     |        |                           |
|                                 | 3- <a href="https://iris.angers.inra.fr/obh/">https://iris.angers.inra.fr/obh/</a> (assigned as Rchinensis3) | 16984               |        |                           |
|                                 | 4- after Get ORF(assigned as Rchinensis4)                                                                    |                     |        |                           |
| <i>R. multiflora</i>            | GCA_002564525.1 (assigned as Rmultiflora)                                                                    | 90830               | 2x; 3x | SI <sup>4</sup>           |
| <i>R. moschata</i>              | Abyss assembly based on: SRR7077017 (assigned as Rmoschata17)                                                | 769                 | 2x     | SI <sup>4</sup>           |
|                                 | SRR6175508 (assigned as Rmoschata08)                                                                         | 1652                |        |                           |
| <i>R. laevigata</i>             | Abyss assembly based on SRR7077018 (assigned as Rlaevigata)                                                  | 1905                | 2x     | SI <sup>4</sup>           |
| <i>R. rugosa</i>                | Abyss assembly based on: SRR6175514 (assigned as Rrugosa14)                                                  | 1759                | 2x     | Partially SI <sup>4</sup> |
|                                 | SRR7077019 (assigned as Rrugosa19)                                                                           | 1031                |        |                           |
| <i>R. persica</i>               | Abyss assembly based on SRR7077021 (assigned as Rpersica)                                                    | 2403                | 2x     | SI <sup>77</sup>          |
| <i>R. xanthina</i>              | Abyss assembly based on SRR7077022 (assigned as Rxanthina)                                                   | 1848                | 2x     | SI <sup>2</sup>           |
| <i>R. minutifolia</i>           | Abyss assembly based on SRR7077023 (assigned as Rminutifolia)                                                | 1685                | 2x     | SI <sup>77</sup>          |
| <i>R. odorata</i>               | Abyss assembly based on SRR6175507 (assigned as Rodorata)                                                    | 1259                | 2x     | SI <sup>4</sup>           |
| <i>R. odorata var. gigantea</i> | Abyss assembly based on SRR6175516 (assigned as Rodorata_gigantea)                                           | 801                 | 2x     | SI <sup>4</sup>           |
| <i>R. arvenses</i>              | Abyss assembly based on SRR6175512 (assigned as Rarvensis)                                                   | 2946                | 2x     | SI <sup>4</sup>           |
| <i>R. majalis</i>               | Abyss assembly based on SRR6175513 (assigned as Rmajalis)                                                    | 1538                | 2x     | SI <sup>78</sup>          |

SI-self-incompatible

**Supplementary Table 2.** Size, motif 1 and 2, and IP of the sequences identified in *R. chinensis*, *R. multiflora*, *R. moschata*, *R. leavigata*, *R. rugosa*, *R. persica*, *R. xantina*, *R. minutifolia*, *R. odorata*, *R. arvensis*, and *R. majalis* genomes.

| Sequence Name                                   | Size of the putative coding region (bp) | Motif 1                    | Motif 2 | IP   |
|-------------------------------------------------|-----------------------------------------|----------------------------|---------|------|
| Rchinensis1_1 (NC_037094; XP_024173652; Chr 7)  | 339                                     | FTIGGIWPYT                 | WPAITIL | 9.54 |
| Rchinensis1_2 (NC_037091; XP_024195082; Chr 4)  | 696                                     | FGIHGLWPNY                 | WPTLACP | 4.74 |
| Rchinensis1_3 (NC_037090; XP_024190016; Chr 3)  | 687                                     | YTIHGLWPSN                 | WPNLERP | 8.81 |
| Rchinensis1_4 (NC_037089; XP_024178267; Chr 2)  | 699                                     | FTVHGIWPTN                 | WPSVVTN | 8.95 |
| Rchinensis1_5 (NC_037091; XP_024196661; Chr 4)  | 684                                     | FGIHGLWPNY                 | WPSMSCP | 5.54 |
| Rchinensis1_6 (NC_037093; XP_024164552; Chr 6)  | 693                                     | FTIHGLWPNN                 | WPDVKNA | 8.8  |
| Rchinensis1_7 (NC_037091; XP_024195588; Chr 4)  | 801                                     | FTLHGLWDQN                 | WPDLSAD | 5.76 |
| Rchinensis1_8 (NC_037090; XP_024190063; Chr 3)  | 663                                     | FTIHGVWPAN                 | WPNVERA | 8.34 |
| Rchinensis1_9 (NC_037093; XP_024163375; Chr 6)  | 867                                     | FTIHGLWPDY                 | WPSLSCG | 6.08 |
| Rchinensis1_10 (NC_037091; XP_024196470; Chr 4) | 348                                     | n. a.                      | n. a.   | 6.24 |
| Rchinensis1_11 (NC_037089; XP_024178028; Chr 2) | 711                                     | n. a.                      | n. a.   | 8.87 |
| Rchinensis1_12 (NC_037089; XP_024177989; Chr 2) | 468                                     | FHVHGIWPSN                 | WPSVLTT | 6.12 |
| Rchinensis2_1 (NC_0370931; Chr 6)               |                                         | Identical to Rchinensis1_6 |         |      |
| Rchinensis2_3 (NC_0370911; Chr 4)               | 804                                     | FTLHGLWDQN                 | WPDLSAD | 5.79 |
| Rchinensis2_4 (NC_0370941; Chr 7)               | 423                                     | FTLHGMWASN                 | WPTLLDN | 5.66 |
| Rchinensis2_5 (NC_0370901; Chr 3)               | 420                                     | FMAFGQYELD                 | WPQLIAS | 9.41 |

|                                       |     |                            |         |      |
|---------------------------------------|-----|----------------------------|---------|------|
| Rchinensis2_6 (NC_ 0370891; Chr 2 )#  | 459 | FTLHGLWPQA                 | WPNLKHT | 9.34 |
| Rchinensis2_7 (NC_ 0370881; Chr 1)    | 579 | FTLHGLWPFN                 | WKSVMRS | 8.54 |
| Rchinensis2_8 (NC_ 0370901; Chr 3)    | 564 | WGIHGIWAEK                 | WSSLSAT | 8.96 |
| Rchinensis2_9 (NC_ 0370901; Chr 3)    | 633 | WTIHGLWTCE                 | WLSNNKN | 6.81 |
| Rchinensis2_11 (NC_ 0370911; Chr 4)   | 567 | FTVHGIWPTN                 | WPSVRRD | 9.42 |
| Rchinensis2_12 (NC_ 0370941; Chr 7)   |     | Identical to Rchinesis1_1  |         |      |
| Rchinensis2_15 (NC_ 0370891; Chr 2)   |     | Identical to Rchinesis1_4  |         |      |
| Rchinensis2_16 (NC_ 0370901; Chr 3)   | 591 | FTLHGFWPSN                 | WPNVKYP | 8.78 |
| Rchinensis2_18 (NC_ 0370901; Chr 3)   | 567 | WTIHGLWAER                 | WPSIMGK | 7.60 |
| Rchinensis2_20 (NC_ 0370891; Chr 2) # | 330 | FTLHGLWPQA                 | WPDLTHS | 6.31 |
| Rchinensis2_23 (NC_ 0370891; Chr 2)   |     | Identical to Rchinesis1_11 |         |      |
| Rchinensis2_24 (NC_ 0370891; Chr 2)   | 708 | FHVHGIWPSN                 | WPSVLTQ | 8.98 |
| Rchinensis2_25 (NC_ 0370901; Chr 3)   |     | Identical to Rchinesis1_8  |         |      |
| Rchinensis2_26 (NC_ 0370891; Chr 2)   | 495 | FHVHGIWPSN                 | WPSVLTT | 6.12 |
| Rchinensis2_27 (NC_ 0370901; ch3)     |     | Identical to Rchinesis1_3  |         |      |
| Rchinensis2_28 (NC_ 0370891; Chr 2)   | 588 | NQVSTWNMA                  | WPSVLIT | 9.07 |
| Rchinensis2_29 (NC_ 0370901; Chr 3)   | 747 | FTIHGLWPSN                 | WPDVKRT | 9.83 |
| Rchinensis2_30 (NC_ 0370931; Chr 6)   | 459 | ITVHGLWPSN                 | WSDVEKG | 7.88 |
| Rchinensis2_31 (NC_ 0370901; Chr 3)   | 651 | FSIHGMWPSN                 | WPSYTGL | 9.13 |

|                                                  |     |                             |          |      |
|--------------------------------------------------|-----|-----------------------------|----------|------|
| Rchinensis2_32_1 (NC_0370911; Chr 4)             | 588 | FGIHGLWPNY                  | WPTLACP  | 4.73 |
| Rchinensis2_32_2 (NC_0370911; Chr 4)             | 513 | FGIHGLWPNY                  | WPSMSCP  | 8.09 |
| Rchinensis2_32_3 (NC_0370911; Chr 4)             | 693 | FGIHGLWPNY                  | WPTLACP  | 4.79 |
| Rchinensis3_1 (RC6 G0321700)                     | 861 | FTIHGLWPDY                  | WPSLSCG  | 6.08 |
| Rchinensis3_2 (RC4 G0029500)                     | 834 | FTLHGLWDQN<br>F             | WPDLSADR | 5.99 |
| Rchinensis3_3 (RC6 G0432600)                     | 714 | FTIHGLWPNN                  | WPDVKNA  | 8.62 |
| Rchinensis3_4 (RC2 G0245900)                     |     | Identical to Rchinensis2_24 |          |      |
| Rchinensis3_5 (RC2 G0245600)                     |     | Identical to Rchinesis1_11  |          |      |
| Rchinensis3_6 ( <i>SRNase30</i> ; RC3 G033300)   | 705 | FFIHGLWPSN                  | WPSFTRR  | 7.01 |
| Rchinensis3_7 (RC4 G0432700)                     | 699 | FGIHGLWPNY                  | WPTLACP  | 4.79 |
| Rchinensis3_8 (RC4 G0432600)                     | 684 | FTIHGLWPNY                  | WPSMSCP  | 5.54 |
| Rchinensis3_9 ( <i>SRNase26</i> ; RC3 G0332600)  | 681 | FTIHGLWPSN                  | WRSYLIA  | 7.54 |
| Rchinensis3_10 ( <i>SRNase36</i> ; RC3 G0333600) | 660 | FTIHGLWPSN                  | WPDVIHG  | 7.57 |
| Rchinensis3_11 (RC1 G0140200)                    |     | Identical to Rchinensis2_7  |          |      |
| Rchinensis3_12 (RC3 G0162200)                    | 570 | WTVHGLWAER                  | WPSIMGK  | 6.87 |
| Rchinensis3_13 (RC4 G009400)0                    |     | Identical to Rchinensis2_11 |          |      |
| Rchinensis3_14 (RC2 G0233900)                    | 486 | FHVHGIWPSN                  | WPSVLTT  | 6.12 |
| Rchinensis3_15 (RC2 G0103900)                    |     | Identical to Rchinensis2_6  |          |      |
| Rchinensis3_16 (RC4                              | 453 | FIIGGFRPG                   | WPARAAT  | 9.39 |

|                                                                        |     |            |                                                          |      |
|------------------------------------------------------------------------|-----|------------|----------------------------------------------------------|------|
| G0432900)                                                              |     |            |                                                          |      |
| Rchinensis3_17 (RC3<br>G0038500)                                       |     |            | Identical to Rchinensis2_16                              |      |
| Rchinensis3_18 (RC7<br>G0339700)                                       | 345 | n. a.      | n. a.                                                    | 9.06 |
| Rchinensis4_1 (Chr 6)                                                  |     |            | Identical to Rchinensis3_3                               |      |
| Rchinensis4_3 (Chr 7)                                                  | 405 | FTLHGMWASN | WPTLLDN                                                  | 5.22 |
| Rchinensis4_4 (Chr 1)                                                  |     |            | Identical to Rchinensis2_7                               |      |
| Rchinensis4_5_1 (Chr 4)                                                | 771 | FTLHGLWDQN | WPDLSAD                                                  | 5.56 |
| Rchinensis4_5_2 (Chr 4)                                                | 807 | FTLHGLWDQN | WPDLSAD                                                  | 5.76 |
| Rchinensis4_7 (Chr 2)#                                                 |     |            | Identical to Rchinensis2_6                               |      |
| Rchinensis4_8 (Chr 0)                                                  | 648 | FTIHGLWPNN | WPDLRNG                                                  | 8.42 |
| Rchinensis4_9 (Chr 0)                                                  | 834 | FTLHGLWDQN | WPDLSAD                                                  | 5.99 |
| Rchinensis4_11 (Chr 3)                                                 | 636 | WTIHGLWTCE | WPSNNKN                                                  | 6.81 |
| Rchinensis4_12 (Chr 3)<br>Rchinensis4_28 ( <i>SRNase26</i> ;<br>Chr 3) |     |            | Identical to Rchinensis2_8<br>Identical to Rchinensis3_9 |      |
| Rchinensis4_29 (Chr 3)                                                 | 570 | FTLHGLWPQA | WPDLTHS                                                  | 6.87 |
| Rchinensis4_31 (Chr 2)                                                 | 690 | FHVHGIWPSN | WPSVLTQ                                                  | 8.87 |
| Rchinensis4_33 (Chr 2)                                                 |     |            | Identical to Rchinensis2_24                              |      |
| Rchinensis4_35 (Chr 2)                                                 | 486 | FHVHGIWPSN | WPSVLTQ                                                  | 6.12 |
| Rchinensis4_37 (Chr 2)                                                 | 336 | FTLHGLWPQA | WPDLTHS                                                  | 6.32 |
| Rchinensis4_38 (Chr 4)                                                 |     |            | Identical to Rchinensis2_11                              |      |
| Rchinensis4_40 (Chr 3)                                                 |     |            | Identical to Rchinensis2_16                              |      |
| Rchinensis4_41 (Chr 2)                                                 | 711 | FTVHGIWPTN | WPSVVTN                                                  | 8.59 |
| Rchinensis4_42 (Chr 4)                                                 | 684 | FGIHGLWPNY | WPSMSCP                                                  | 5.54 |
| Rchinensis4_44_1<br>( <i>SRNase36</i> ; Chr 3)                         |     |            | Identical to Rchinensis3_10                              |      |
| Rchinensis4_44_2<br>( <i>SRNase30</i> ; Chr 3)                         |     |            | Identical to Rchinensis3_6                               |      |
| Rmultiflora_1                                                          | 606 | FTIHGLWPNN | WPDVKNA                                                  | 8.38 |
| Rmultiflora_2                                                          | 408 | n. a.      | WPDVKNA                                                  | 8.91 |



|                |     |            |         |      |
|----------------|-----|------------|---------|------|
| Rmultiflora_3  | 628 | FSIHGMWPSN | WPSYTGL | 9.25 |
| Rmultiflora_4  | 594 | YTIHGLWPNN | WPNLENS | 8.38 |
| Rmultiflora_5  | 246 | FTLHGFWPSN | n. a.   |      |
| Rmultiflora_6  | 639 | FTVHGIWPTN | WPSVVTN | 8.31 |
| Rmultiflora_7  | 483 | n. a.      | WPNVKYP | 9.26 |
| Rmultiflora_8  | 657 | YTIHGLWPSN | WPNLENL | 8.37 |
| Rmultiflora_9  | 597 | FHVHGIWPSN | WPSVLTT | 8.53 |
| Rmultiflora_10 | 672 | FTIHGLWPSN | WRSYLIA | 6.26 |
| Rmultiflora_11 | 708 | FTIHGVWPAN | WPNVERA | 8.95 |
| Rmultiflora_12 | 426 | FTVHGIWPTN | WPSFRRD | 6.56 |
| Rmultiflora_14 | 276 | n. a.      | WPNVKYP | 7.89 |
| Rmultiflora_15 | 672 | FHVHGIWPSN | WPSVLTQ | 8.33 |
| Rmultiflora_16 | 675 | FTIHGLWPSN | WPQLIAR | 9.12 |
| Rmultiflora_18 | 150 | FTIHGLWPSN | n. a.   |      |
| Rmultiflora_19 | 591 | FGIHGLWPNY | WPTLACP | 4.71 |
| Rmultiflora_20 | 591 | FGIHGLWPNY | WPTLACP | 4.73 |
| Rmultiflora_21 | 711 | FTIHGLWPSN | WPDVKPT | 9.42 |
| Rmultiflora_24 | 459 | FTLHGLWPQA | WPNLKHT | 9.22 |
| Rmultiflora_25 | 687 | FTIHGLWPSN | WPNVYYY | 8.68 |
| Rmultiflora_27 | 624 | WTIHGLWAER | WPSIMGK | 7.64 |
| Rmultiflora_28 | 615 | WTIHGLWAER | WPSIMGK | 7.64 |
| Rmultiflora_29 | 402 | n. a.      | WPSIMGK | 8.31 |
| Rmultiflora_31 | 291 | FTIGGIWPYT | n. a.   | -    |
| Rmoschata08_1  | 147 | n. a.      | n. a.   | 6.75 |
| Rmoschata08_2# | 270 | FTLHRLWHQN | WPDLSRD | 9.69 |
| Rmoschata08_3  | 219 | n. a.      | n. a.   | 8.66 |
| Rmoschata08_5  | 408 | n. a.      | WPNPFWN | 5.4  |
| Rmoschata08_6  | 408 | n. a.      | WPSFSTT | 5.33 |
| Rmoschata08_7  | 135 | FTVHGIWPTN | n. a.   |      |
| Rmoschata08_9  | 147 | n. a.      | WPSLYGK | 5.41 |
| Rmoschata08_10 | 417 | n. a.      | WPNVKYP | 8.62 |

|                 |     |                             |         |      |
|-----------------|-----|-----------------------------|---------|------|
| Rmoschata08_11  | 519 | FTIHGVWPAN                  | WPNVERA | 9.21 |
| Rmoschata08_12  | 261 | YTIHGLWPSN                  | n. a.   |      |
| Rmoschata08_13  | 423 | n. a.                       | WPTLACP | 4.75 |
| Rmoschata08_14  | 168 | FGIHGLWPNY                  | n. a.   |      |
| Rmoschata08_15  | 126 | FTIHGLWPSN                  | n. a.   |      |
| Rmoschata08_17# | 525 | FTLHGLWDQN                  | WPDLSAD | 8.97 |
| Rmoschata08_18  | 714 | FTIHGLWPNN                  | WPDVKNA | 8.28 |
| Rmoschata08_20  | 135 | n. a.                       | WPNVEVP | 4.7  |
| Rmoschata08_23  | 447 | n. a.                       | WPSYTGL | 9.15 |
| Rmoschata08_24  | 321 | n. a.                       | WPSLACP | 9.01 |
| Rmoschata08_25  | 438 | ITVHGLWPSN                  | WSDVEKG | 9.04 |
| Rmoschata08_26  | 291 | n. a.                       | n. a.   | 9.3  |
| Rmoschata08_27  | 261 | n. a.                       | WPSTYKE | 5.57 |
| Rmoschata08_28  | 147 | n. a.                       | WPSIMGK | 6.92 |
| Rmoschata08_29  | 171 | n. a.                       | n. a.   | 8.02 |
| Rmoschata08_30  | 108 | FTIHG                       | n. a.   |      |
| Rmoschata08_31  | 471 | FGIHGLWPNY                  | WPSMSCP | 6.56 |
| Rmoschata08_32  | 213 | FTVHGIWPTN                  | WPSVLTN | 5.67 |
| Rmoschata08_33# | 591 | FTLHGLWPQA                  | WPDLTHS | 5.95 |
| Rmoschata08_34  | 186 | FTIHGLFFFW                  | n. a.   |      |
| Rmoschata08_36  | 408 | n. a.                       | n. a.   | 9.36 |
| Rmoschata08_37  | 237 | FSVHGLWPSN                  | n. a.   |      |
| Rmoschata08_39  | 180 | FTIHGFWPSN                  | n. a.   |      |
| Rmoschata08_40  | 162 | n. a.                       | WPQLMSH | 5.78 |
| Rmoschata08_41  | 669 | WTIHGLWTCE                  | WPSNNKN | 8.09 |
| Rmoschata17_2   | 141 | FTIHGLWPNN                  | n. a.   |      |
| Rmoschata17_3   | 315 | n. a.                       | n. a.   | 4.64 |
| Rmoschata17_4   | 408 | LTIHGLWPTN                  | WPNAVGP | 8.89 |
| Rmoschata17_5   | 147 | n. a.                       | WPNLTGD | 4.32 |
| Rmoschata17_6   | 270 | n. a.                       | WPSLSCA | 9.51 |
| Rmoschata17_9   | 705 | FHVHGIWPSN                  | WPSVLTQ | 6.03 |
| Rmoschata17_10  |     | Identical to Rmoschata08_31 |         |      |

|                |     |                             |         |      |
|----------------|-----|-----------------------------|---------|------|
| Rmoschata17_12 | 288 | n. a.                       | n. a.   | 9.54 |
| Rmoschata17_14 | 255 | YTIHGLWPSN                  | WPNLELP | 9.44 |
| Rmoschata17_15 | 150 | FTIHGLWPSN                  | n. a.   |      |
| Rmoschata17_18 | 120 | FTLHGLWASN                  | n. a.   |      |
| Rmoschata17_23 |     | Identical to Rmoschata08_36 |         |      |
| Rmoschata17_24 | 228 | n. a.                       | n. a.   | 7.86 |
| Rmoschata17_27 | 444 | n. a.                       | WPDLKNG | 8.28 |
| Rmoschata17_28 | 240 | n. a.                       | n. a.   | 4.97 |
| Rmoschata17_29 | 114 | n. a.                       | WPQLLAH | 4.22 |
| Rmoschata17_30 | 198 | FSIHGMWPSN                  | n. a.   |      |
| Rmoschata17_31 | 336 | FTIHGLWPSN                  | WRSYPIG | 7.00 |
| Rmoschata17_32 | 219 | n. a.                       | n. a.   | 8.55 |
| Rmoschata17_36 |     | Identical to Rmoschata08_14 |         |      |
| Rlaevigata_1   | 228 | n. a.                       | n. a.   | 6.74 |
| Rlaevigata_2   | 108 | n. a.                       | n. a.   | 7.62 |
| Rlaevigata_3   | 219 | FTIHGLWPSN                  | n. a.   |      |
| Rlaevigata_4   | 444 | n. a.                       | WPDLKNG | 8.87 |
| Rlaevigata_6   | 450 | n. a.                       | WRSYLIG | 6.94 |
| Rlaevigata_7   | 255 | n. a.                       | WPSMSCP | 9.15 |
| Rlaevigata_8   | 240 | FTIHGLWPNN                  | n. a.   |      |
| Rlaevigata_9   | 162 | FTIHGLWPSN                  | n. a.   |      |
| Rlaevigata_10  | 438 | n. a.                       | WPNVEKV | 8.25 |
| Rlaevigata_11  | 210 | FGIHGLWPNY                  | n. a.   |      |
| Rlaevigata_12  | 750 | FTIHGLRPSN                  | WPDVERL | 9.12 |
| Rlaevigata_13  | 510 | WGIHGIWAEK                  | WPSISTQ | 4.97 |
| Rlaevigata_16# | 462 | FTLHGLWPQA                  | WPNLKHT | 9.32 |
| Rlaevigata_17  | 492 | FTLHGMWASN                  | WPTLLDN | 4.77 |
| Rlaevigata_18  | 462 | FTIHGVWPAN                  | WPNVERA | 9.20 |
| Rlaevigata_19  | 438 | FHVHRIWPSN                  | WSSVLTA | 9.14 |
| Rlaevigata_20  | 420 | n. a.                       | WPSLYAN | 5.17 |
| Rlaevigata_21  | 495 | FSIHGMWPSN                  | WPSYTGL | 9.44 |

|                |     |            |         |      |
|----------------|-----|------------|---------|------|
| Rlaevigata_24  | 435 | ITVHGLWPSN | WSDVEKG | 8.71 |
| Rlaevigata_25# | 573 | FTLHGLWDQN | WPDLSAD | 7.72 |
| Rlaevigata_26  | 561 | FTIHGLWPSN | WPQLIAH | 5.46 |
| Rlaevigata_27  | 711 | FHVHGIWPSN | WPSVLTQ | 8.38 |
| Rlaevigata_28  | 420 | n. a.      | WPQLIPY | 8.45 |
| Rlaevigata_30  | 546 | FTVHGIWPTN | WPSVLTQ | 8.71 |
| Rlaevigata_31  | 234 | FTIHGLWPSN | n. a.   |      |
| Rlaevigata_32# | 390 | FTLHGLWPQA | WPDLTHS | 7.40 |
| Rlaevigata_33  | 432 | FTIGGIWPYT | WPSLPCP | 9.49 |
| Rrugosa14_1    | 177 | FSVHGLWPSN | n. a.   |      |
| Rrugosa14_2    | 171 | FTIHGLWPSN | n. a.   |      |
| Rrugosa14_3    | 132 | FTVHGIWPTN | n. a.   |      |
| Rrugosa14_4    | 81  | n. a.      | n. a.   | 8.15 |
| Rrugosa14_5    | 420 | n. a.      | WPTLACP | 4.75 |
| Rrugosa14_6    | 426 | n. a.      | WPSVLTQ | 5.90 |
| Rrugosa14_7    | 121 | FTLHGLWATN | n. a.   |      |
| Rrugosa14_8    | 453 | FGIHGLWPNY | WPSMSCP | 7.09 |
| Rrugosa14_9    | 483 | FSIHGMWPSN | WPSYTGL | 8.98 |
| Rrugosa14_10   | 114 | n. a.      | WPQLIAR | 8.16 |
| Rrugosa14_11   | 126 | FTIHGLWPSN | n. a.   |      |
| Rrugosa14_12   | 105 | FTIHGLWPSN | n. a.   |      |
| Rrugosa14_13   | 624 | FTIHGLWPNN | WPDVKNA | 8.58 |
| Rrugosa14_15   | 228 | FTVHGIWPTN | WPSVRTD | 6.44 |
| Rrugosa14_17   | 525 | LLLHGLWPAN | WPNLTGD | 6.05 |
| Rrugosa14_18   | 392 | ITVHGLWPSN | WSDVEKG | 8.15 |
| Rrugosa14_19   | 411 | ITVHGLWPSN | WSDVEKG | 8.79 |
| Rrugosa14_20   | 423 | n. a.      | WPTLACP | 4.75 |
| Rrugosa14_23   | 156 | FTIHGLWPSN | n. a.   |      |
| Rrugosa14_24   | 273 | FGIHGLWPNY | n. a.   |      |
| Rrugosa14_25   | 135 | FTVHGIWPTN | n. a.   | 8.76 |
| Rrugosa14_26   | 180 | n. a.      | WPQLITR | 9.30 |

|               |     |                           |         |      |
|---------------|-----|---------------------------|---------|------|
| Rrugosa14_27  | 435 | n. a                      | WHGLYGK | 4.76 |
| Rrugosa14_28  | 399 | FTIHGLWPSN                | WPDLENG | 7.87 |
| Rrugosa14_29  | 255 | FTIHGLWPSN                | n. a.   |      |
| Rrugosa14_30  | 249 | n. a.                     | WPNTYKD | 5.16 |
| Rrugosa14_32  | 423 | n. a.                     | WPDVGGG | 8.87 |
| Rrugosa14_33  | 408 | n. a.                     | WPNVVTP | 9.24 |
| Rrugosa14_34  | 450 | n. a.                     | WRSYPIG | 7.66 |
| Rrugosa14_35  | 516 | FTIHGLWPSN                | WPNVETP | 9.28 |
| Rrugosa14_36  | 255 | n. a.                     | WPSMSCP | 8.91 |
| Rrugosa14_37  | 108 | n. a.                     | WPSVMTD | 4.80 |
| Rrugosa14_38  | 156 | FTIHGLWPSN                | n. a.   |      |
| Rrugosa14_39# | 285 | FTLHGLWDQN                | WPDLSAD | 8.00 |
| Rrugosa14_40  | 486 | FTLHGLWPQA                | WPDLTHS | 7.48 |
| Rrugosa14_42  | 627 | FTIHGVWPAN                | WPNVERA | 9.21 |
| Rrugosa19_6   | 165 | n. a.                     | WPSIMGK | 6.92 |
| Rrugosa19_7   | 183 | FTIHGLWPSN                | n. a.   |      |
| Rrugosa19_8   | 411 | n. a.                     | WPSNDNE | 5.21 |
| Rrugosa19_9   |     | Identical to Rrugosa14_20 |         |      |
| Rrugosa19_10  | 216 | FTLHGFWPSN                | n. a.   |      |
| Rrugosa19_11  | 255 | FGIHGLWPNY                | n. a.   |      |
| Rrugosa19_12  | 201 | n. a.                     | WPQLISH | 6.00 |
| Rrugosa19_13  | 270 | n. a.                     | n. a. * | 6.89 |
| Rrugosa19_14  | 420 | n. a.                     | WPNVKYP | 8.85 |
| Rrugosa19_15  | 342 | FHVHGIWPSN                | MASVLTT | 8.32 |
| Rrugosa19_16  | 126 | n. a.                     | WPSVLID | 4.86 |
| Rrugosa19_17  | 189 | n. a.                     | WPGISGK | 4.60 |
| Rrugosa19_19  | 186 | n. a.                     | WPDLRNG | 6.06 |
| Rrugosa19_21  | 159 | FTLHGLWASN                | n. a.   | 4.20 |
| Rrugosa19_22  | 258 | n. a.                     | n. a.*  | 9.81 |
| Rrugosa19_23  | 270 | n. a.                     | n. a.*  | 6.89 |
| Rrugosa19_25  |     | Identical to Rrugosa14_25 |         |      |

|               |     |                           |          |       |
|---------------|-----|---------------------------|----------|-------|
| Rrugosa19_26  |     | Identical to Rrugosa14_26 |          |       |
| Rrugosa19_27  | 660 | WSIHGIWAEK                | WPSLSTD  | 5.52  |
| Rrugosa19_29  |     | Identical to Rrugosa14_29 |          |       |
| Rrugosa19_31# | 471 | FTLHGLWPQA                | WPNLKHT  | 9.32  |
| Rrugosa19_33  |     | Identical to Rrugosa14_42 |          |       |
| Rrugosa19_34  |     | Identical to Rrugosa14_38 |          |       |
| Rrugosa19_35  |     | Identical to Rrugosa14_36 |          |       |
| Rrugosa19_36  |     | Identical to Rrugosa14_35 |          |       |
| Rrugosa19_37  | 141 | FTIHG                     | n. a.    |       |
| Rrugosa19_45  | 249 | FTIHGLWPNN                | n. a.    |       |
| Rrugosa19_47  | 147 | FTIHGLWPNN                | n. a.    |       |
| Rrugosa19_48  | 627 | WTIHGLWTYE                | WPINNKN  | 9.24  |
| Rrugosa19_50  | 546 | n. a.                     | WPDVLNG  | 9.65  |
| Rpersica_2    | 135 | n. a.                     | n. a.    | 8.63  |
| Rpersica_4    | 222 | n. a.                     | n. a.    | 7.93  |
| Rpersica_5    | 699 | FTIGGIWPYT                | WPSLSCP  | 9.52  |
| Rpersica_6    | 666 | WTIHGLWPVR                | WPSLSGK  | 6.57  |
| Rpersica_7    | 708 | FTLHGLWPFN                | WKS YKRS | 5.02  |
| Rpersica_8    | 372 | FTVHGIWPTN                | WPSVRTD  | 9.05  |
| Rpersica_9    | 471 | FGIHGLWPNY                | WPSMSCP  | 5.94  |
| Rpersica_10   | 675 | FGIHGLWPNY                | WPTLACP  | 4.55  |
| Rpersica_11   | 420 | FTIHGLWPSN                | WPDVRKA  | 9.18  |
| Rpersica_12   | 522 | FTIHGLWPSN                | WPQLIAR  | 9.38  |
| Rpersica_13   | 543 | FILHGLWPVN                | WKNCEKG  | 4.64  |
| Rpersica_14   | 651 | FSIHGLWPSN                | WPDVEKG  | 8.85  |
| Rpersica_15   | 177 | n. a.                     | n. a.    | 9.78  |
| Rpersica_16   | 174 | NTIHAHWPTN                | n. a.    | 10.57 |
| Rpersica_17#  | 462 | FTLHGLWLQA                | WPNLKHT  | 9.30  |
| Rpersica_18   | 207 | FTLHGLWAIN                | n. a.    |       |
| Rpersica_19   | 189 | n. a.                     | n. a.    | 9.72  |
| Rpersica_20   | 585 | FTIHGVWPTN                | WPNVERA  | 9.00  |

|               |     |             |          |      |
|---------------|-----|-------------|----------|------|
| Rpersica_21   | 315 | FHVHGIWPSN  | WPSVLTT  | 6.17 |
| Rpersica_22   | 156 | n. a.       | WPNLIGN  | 9.78 |
| Rpersica_23   | 552 | VTVHGLWPSN  | WPDVETG  | 8.81 |
| Rpersica_24   | 627 | FTLYGFWPVN  | WKNYEKG  | 5.82 |
| Rpersica_25   | 603 | FSIHGLWPSN  | WPDVEKG  | 8.88 |
| Rpersica_26   | 180 | n. a.       | WPQLIAH  | 5.38 |
| Rxanthina_ 1  | 687 | FTLHGLWPFN  | WKS YERS | 4.95 |
| Rxanthina_ 2# | 390 | FTLHGLWPQA  | WPNLKHA  | 9.16 |
| Rxanthina_ 3  | 228 | n. a.       | n. a.    | 5.31 |
| Rxanthina_ 4  | 207 | n. a.       | n. a.    | 9.05 |
| Rxanthina_ 6  | 441 | n. a.       | WPDLRNG  | 9.18 |
| Rxanthina_ 7  | 780 | LTIHGLWPGF  | WPNVKSP  | 8.75 |
| Rxanthina_ 8  | 792 | FTIHGLWPSN  | WPDVVYL  | 9.43 |
| Rxanthina_ 9  | 669 | LTIHGLWPSN  | APVNC SF | 8.6  |
| Rxanthina_ 10 | 168 | FGIHGLWP NY | n. a.    |      |
| Rxanthina_ 11 | 756 | FTLHGMWASN  | WPTLLDN  | 7.68 |
| Rxanthina_ 12 | 654 | FSIHGVW PEN | WPNVVIP  | 4.44 |
| Rxanthina_ 13 | 552 | ITVHGLWPSN  | WSDVEKG  | 9.23 |
| Rxanthina_ 14 | 153 | n. a.       | WPSIMGK  | 6.92 |
| Rxanthina_ 15 | 255 | FTIHGLWPSN  | n. a.    |      |
| Rxanthina_ 16 | 420 | n. a.       | WPNVKFP  | 8.64 |
| Rxanthina_ 17 | 258 | FTIHGLWP NN | n. a.    |      |
| Rxanthina_ 18 | 648 | FTIHGLWPSN  | FLPVACP  | 6.38 |
| Rxanthina_ 19 | 471 | FGIHGLWP NY | WPSMSCP  | 5.94 |
| Rxanthina_ 20 | 537 | QAMAGLWCGS  | WPTLACP  | 5.54 |
| Rxanthina_ 21 | 408 | FSVHGLWPSN  | WPD LERG | 9.87 |
| Rxanthina_ 22 | 261 | FTIHGF WPSN | n. a.    |      |
| Rxanthina_ 23 | 696 | FFIHGLWPSN  | WRSFTRR  | 9.72 |
| Rxanthina_ 24 | 507 | FTLHGLWPVN  | WKNYEKG  | 4.97 |
| Rxanthina_ 25 | 546 | n. a.       | WPSLACP  | 5.07 |
| Rxanthina_ 27 | 435 | n. a.       | WPDVKNA  | 7.78 |

|                 |     |                              |                  |      |
|-----------------|-----|------------------------------|------------------|------|
| Rxanthina_29    | 516 | FTIHGVWPA <b>N</b>           | WPNVERA          | 9.01 |
| Rxanthina_30    | 204 | FTVHGIW <b>P</b> PN          | n. a.            |      |
| Rxanthina_31    | 465 | FTVHGIW <b>P</b> TN          | WPSVLTD          | 7.14 |
| Rxanthina_32    | 216 | FSIHGMWPS <b>N</b>           | n. a.            |      |
| Rxanthina_33    | 450 | n. a.                        | W <b>R</b> SYLIG | 7.66 |
| Rxanthina_34    | 411 | n. a.                        | WPS <b>N</b> DNE | 4.82 |
| Rxanthina_35    | 207 | FTIHGLWP <b>N</b> N          | n. a.            |      |
| Rxanthina_36    | 447 | n. a.                        | WPS <b>Y</b> TGL | 8.84 |
| Rxanthina_37    | 411 | F <b>H</b> VHGIWPS <b>N</b>  | WPS <b>L</b> LTK | 6.57 |
| Rminutifolia_3  | 72  | n. a.                        | n. a.            | 4.66 |
| Rminutifolia_4  | 540 | FTIHGLWPS <b>N</b>           | WPQLIAR          | 8.89 |
| Rminutifolia_6  | 168 | F <b>G</b> IHGLWP <b>N</b> Y | n. a.            |      |
| Rminutifolia_7  | 246 | <b>Y</b> TIHGLWPS <b>N</b>   | n. a.            |      |
| Rminutifolia_8  | 471 | F <b>G</b> IHGLWP <b>N</b> Y | WPS <b>M</b> SCP | 6.56 |
| Rminutifolia_9  | 252 | n. a.                        | WPQLIAH          | 5.41 |
| Rminutifolia_10 | 165 | FTIHGLWP <b>N</b> N          | n. a.            |      |
| Rminutifolia_11 | 162 | n. a.                        | W <b>K</b> NYEKG | 9.39 |
| Rminutifolia_12 | 567 | F <b>H</b> VHGIWPS <b>N</b>  | WPS <b>V</b> LTT | 6.70 |
| Rminutifolia_13 | 165 | FTIHGLWP <b>N</b> N          | n. a.            |      |
| Rminutifolia_14 | 111 | FTVHGIW <b>P</b> TN          | n. a.            |      |
| Rminutifolia_15 | 504 | n. a.                        | W <b>K</b> SYNHI | 5.90 |
| Rminutifolia_17 | 702 | FTIHGLW <b>L</b> SS          | WPNVVYG          | 9.67 |
| Rminutifolia_18 | 189 | n. a.                        | WPS <b>I</b> MGK | 5.46 |
| Rminutifolia_20 | 432 | n. a.                        | WPNLEIG          | 8.25 |
| Rminutifolia_21 | 732 | FTVHGLW <b>P</b> TK          | WPQLKAH          | 9.23 |
| Rminutifolia_23 | 486 | <b>I</b> TVHGLWPS <b>N</b>   | WPDVEKG          | 7.09 |
| Rminutifolia_24 | 210 | F <b>H</b> VHGIWPS <b>N</b>  | n. a.            |      |
| Rminutifolia_26 | 234 | FSVHGLWPS <b>N</b>           | n. a.            |      |
| Rminutifolia_27 | 429 | FT <b>I</b> GGIWP <b>Y</b> T | WPS <b>L</b> SCP | 9.64 |
| Rminutifolia_29 | 306 | n. a.                        | n. a.            | 5.90 |
| Rminutifolia_30 | 174 | n. a.                        | WPDVEKG          | 6.95 |



|                   |     |            |          |      |
|-------------------|-----|------------|----------|------|
| Rminutifolia_ 31# | 459 | FTLHGLWPQA | WPDLTHS  | 6.58 |
| Rminutifolia_ 32  | 75  | n. a.      | WPSVMTD  | 4.80 |
| Rminutifolia_ 33  | 477 | n. a.      | WPDLRNG  | 9.02 |
| Rminutifolia_ 34  | 624 | FTIHGLWPNN | WPDVKNA  | 8.86 |
| Rminutifolia_ 35  | 768 | FTIHGLWPSN | WPDANHNP | 9.17 |
| Rminutifolia_ 36  | 495 | GLWPFN     | WKSVMRS  | 4.90 |
| Rminutifolia_ 38  | 507 | FTIHGLWPTS | WPNVVTP  | 9.55 |
| Rminutifolia_ 39  | 423 | n. a.      | WPTLACP  | 4.75 |
| Rminutifolia_ 40  | 177 | n. a.      | WPSLYGK  | 4.78 |
| Rminutifolia_ 41  | 411 | n. a.      | WPSNDNE  | 4.93 |
| Rminutifolia_ 43  | 195 | n. a.      | n. a.    | 8.66 |
| Rodorata07_1      | 186 | FTIHRLWASN | n. a.    |      |
| Rodorata07_2      | 123 | FHVHGIWPSN | n. a.    |      |
| Rodorata07_3      | 654 | FSIHGMWPSN | WPSYTGL  | 9.13 |
| Rodorata07_4      | 234 | FSVHGLWPSN | n. a.    | -    |
| Rodorata07_6      | 468 | FGIHGLWPNY | WPSMSCP  | 6.56 |
| Rodorata07_7      | 369 | FGIHGLWPNY | WPSMSCP  | 7.06 |
| Rodorata07_8      | 297 | n. a.      | WPSVVTN  | 7.01 |
| Rodorata07_9      | 372 | n. a.      | n. a.    | 9.36 |
| Rodorata07_10     | 231 | FTIHGLWPSN | n. a.    |      |
| Rodorata07_11#    | 471 | FTLHGLWPQA | WPNLKHT  | 9.32 |
| Rodorata07_13     | 168 | n. a.      | WPSVLIT  | 5.36 |
| Rodorata07_15     | 120 | FTVHGIWPTN | n. a.    |      |
| Rodorata07_16     | 201 | FTLHGFWPSN | n. a.    |      |
| Rodorata07_17     | 111 | n. a.      | WPSVRRD  | 6.92 |
| Rodorata07_18     | 240 | FTIHGLWPSN | n. a.    |      |
| Rodorata07_19     | 126 | FTVHGIWPTN | n. a.    |      |
| Rodorata07_20     | 237 | FTIHGQWPSN | n. a.    |      |
| Rodorata07_21     | 678 | FFIHGLWPSN | WPSFTRR  | 8.05 |
| Rodorata07_24     | 189 | FTIHGLWPNN | n. a.    |      |
| Rodorata07_25     | 450 | n. a.      | WRSYLIA  | 7.65 |

|                      |     |                            |          |       |
|----------------------|-----|----------------------------|----------|-------|
| Rodorata07_26        | 696 | FGIHGLWPNY                 | WPTLACP  | 4.79  |
| Rodorata07_27        | 408 | n. a.                      | WPNVKFW  | 8.58  |
| Rodorata07_28        | 150 | FTTHGLWPSN                 | n. a.    |       |
| Rodorata07_29        | 147 | FTIHGLWPNN                 | n. a.    |       |
| Rodorata07_30        | 435 | n. a.                      | WPDVKNA  | 6.99  |
| Rodorata07_31        | 282 | ITVHGLWPSN                 | WSDVEKG  | 8.63  |
| Rodorata07_32        | 519 | FTIHGVWPAN                 | WPNVERA  | 9.21  |
| Rodorata07_33        | 177 | n. a.                      | WPSIMGK  | 8.11  |
| Rodorata07_34        | 708 | FTIHGLWPSN                 | WPNVYYY  | 8.47  |
| Rodorata07_35        | 294 | ITVHGLWPSN                 | WSDVEKG  | 8.66  |
| Rodorata07_36        | 111 | n. a.                      | WPSVVTN  | 5.35  |
| Rodorata07_37        | 180 | FHVHGIWPSN                 | n. a.    |       |
| Rodorata07_38        | 417 | n. a.                      | WPNVKYP  | 7.68  |
| Rodorata07_39        | 87  | YTIHGLWPSN                 | n. a.    |       |
| Rodorata07_40        | 669 | WTIHGLWTCE                 | WPSNNKN  | 8.35  |
| Rodorata07_43        | 258 | n. a.                      | WPSVLTQ  | 5.80  |
| Rodorata07_44        | 246 | n. a.                      | WPSTYKE  | 6.10  |
| Rodorata07_45        | 444 | n. a.                      | WPDLRNG  | 6.40  |
| Rodorata07_46        | 420 | n. a.                      | WPDVIHG  | 6.99  |
| Rodorata07_47        | 470 | FTIHGLWPSN                 | WPDVKRT  | 10.07 |
| Rodorata_gigantea_1  |     | Identical to Rodorata07_6  |          |       |
| Rodorata_gigantea_2  |     | Identical to Rodorata07_34 |          |       |
| Rodorata_gigantea_3  | 441 | FTTHGLWPSN                 | WPDVEKG  | 7.64  |
| Rodorata_gigantea_4  |     | Identical to Rodorata07_46 |          |       |
| Rodorata_gigantea_5  | 345 | FTHLHGLWPQA                | WPDLTHS  | 8.87  |
| Rodorata_gigantea_6  |     | Identical to Rodorata07_30 |          |       |
| Rodorata_gigantea_7  | 339 | n. a.                      | WKSYGSG  | 9.54  |
| Rodorata_gigantea_8  |     | Identical to Rodorata07_26 |          |       |
| Rodorata_gigantea_9  | 246 | FSVHGLWPSN                 | n. a.    |       |
| Rodorata_gigantea_10 | 237 | n. a.                      | WPDLKNG  | 8.89  |
| Rodorata_gigantea_11 |     | Identical to Rodorata07_32 |          |       |
| Rodorata_gigantea_12 | 378 | n. a.                      | WKSYPKRS | 4.99  |

|                       |     |                            |          |      |
|-----------------------|-----|----------------------------|----------|------|
| Rodorata_gigantea_13  | 390 | n. a.                      | n. a.    | 9.22 |
| Rodorata_gigantea_14  | 216 | n. a.                      | n. a.    | 9.14 |
| Rodorata_gigantea_15  |     | Identical to Rodorata07_29 |          |      |
| Rodorata_gigantea_16  |     | Identical to Rodorata07_18 |          |      |
| Rodorata_gigantea_17  |     | Identical to Rodorata07_9  |          |      |
| Rodorata_gigantea_19  |     | Identical to Rodorata07_21 |          |      |
| Rodorata_gigantea_20  | 215 | FTIHGLF                    | n. a.    |      |
| Rodorata_gigantea_21  | 273 | n. a.                      | n. a.    | 5.35 |
| Rodorata_gigantea_23  |     | Identical to Rodorata07_8  |          |      |
| Rodorata_gigantea_24  |     | Identical to Rodorata07_16 |          |      |
| Rodorata_gigantea_25  | 180 | FHVHGIWPSN                 | n. a.    |      |
| Rodorata_gigantea_26  |     | Identical to Rodorata07_35 |          |      |
| Rodorata_gigantea_28  | 237 | n. a.                      | WKS YKRS | 5.33 |
| Rodorata_gigantea_29  | 129 | FTIHRLWPSN                 | n. a.    |      |
| Rodorata_gigantea_30  |     | Identical to Rodorata07_21 |          |      |
| Rodorata_gigantea_31# | 237 | FTLHGLWDQN                 | WPDLSAD  | 9.06 |
| Rodorata_gigantea_32  |     | Identical to Rodorata07_10 |          |      |
| Rodorata_gigantea_33  | 108 | n. a.                      | n. a.    | 4.57 |
| Rodorata_gigantea_36  |     | Identical to Rodorata07_26 |          |      |
| Rodorata_gigantea_37  | 162 | n. a.                      | n. a.    | 9.23 |
| Rodorata_gigantea_38  |     | Identical to Rodorata07_29 |          |      |
| Rodorata_gigantea_39  | 105 | n. a.                      | WPDISGK  | 5.41 |
| Rodorata_gigantea_40  |     | Identical to Rodorata07_2  |          |      |
| Rodorata_gigantea_41  | 126 | n. a.                      | n. a.    | 8.61 |
| Rodorata_gigantea_42  |     | Identical to Rodorata07_24 |          |      |
| Rodorata_gigantea_43  | 108 | n. a.                      | n.a.     | 8.99 |
| Rodorata_gigantea_44  |     | Identical to Rodorata07_6  |          |      |
| Rodorata_gigantea_45  | 105 | n. a.                      | n. a.    | 8.06 |
| Rodorata_gigantea_46  |     | Identical to Rodorata07_45 |          |      |
| Rarvensis_1           | 180 | n. a.                      | WPSVLTD  | 5.39 |
| Rarvensis_2           | 660 | FTIHGLWPYN                 | WPD AHSV | 8.88 |

|              |     |            |         |      |
|--------------|-----|------------|---------|------|
| Rarvensis_3  | 420 | n. a.      | WPSIMGK | 7.79 |
| Rarvensis_4  | 633 | WTIHGLWAYR | WPSNNPN | 8.38 |
| Rarvensis_6  | 179 | YTIHGLWPSN | n. a.   |      |
| Rarvensis_7  | 177 | n. a.      | WPSYTGL | 7.91 |
| Rarvensis_8  | 237 | n. a.      | WPSVLTQ | 5.02 |
| Rarvensis_9  | 357 | FLLHGLWPAN | n. a.   |      |
| Rarvensis_10 | 546 | FTLHGLWPFN | WKSVMRS | 8.20 |
| Rarvensis_11 | 396 | n. a.      | WPNLEYG | 7.09 |
| Rarvensis_13 | 312 | n. a.      | n. a.   | 9.46 |
| Rarvensis_14 | 153 | FTVHGIWPTN | n. a.   |      |
| Rarvensis_15 | 216 | FTIHGLWPNN | n. a.   |      |
| Rarvensis_16 | 246 | n. a.      | WPSLARP | 8.60 |
| Rarvensis_18 | 195 | FSVHGLWSSN | n. a.   |      |
| Rarvensis_19 | 690 | FTIHGVWPAN | WPNVERA | 8.96 |
| Rarvensis_20 | 423 | n. a.      | WPNLTGD | 6.39 |
| Rarvensis_21 | 418 | n. a.      | WPDVIHG | 6.58 |
| Rarvensis_22 | 126 | FTIGGIWPYT | n. a.   |      |
| Rarvensis_23 | 173 | FTIHGLWPSN | n. a.   |      |
| Rarvensis_24 | 444 | n. a.      | WPDLRNG | 7.63 |
| Rarvensis_25 | 540 | FTIHGLWPSN | WPQLIAR | 8.87 |
| Rarvensis_26 | 453 | n. a.      | WPSFTRR | 8.80 |
| Rarvensis_27 | 576 | FGIHGLWPNY | WPTLACP | 4.73 |
| Rarvensis_29 | 120 | FTLHGIWASN | n. a.   |      |
| Rarvensis_32 | 267 | FGIHGLWPNY | n. a.   |      |
| Rarvensis_33 | 699 | FTLHGLWPQA | WPDLTHS | 8.52 |
| Rarvensis_34 | 246 | FTIHGLWPSN | n. a.   | 7.87 |
| Rarvensis_35 | 210 | FTIHGLF    | n. a.   |      |
| Rarvensis_36 | 223 | n. a.      | WPSMSCP | 7.97 |
| Rarvensis_38 | 408 | n. a.      | WPNPIPN | 6.55 |
| Rarvensis_39 | 408 | ITVHGLWPSN | WPDVEKG | 8.86 |
| Rarvensis_40 | 87  | FWIHG      | n. a.   |      |
| Rarvensis_41 | 108 | n. a.      | n. a.   | 8.96 |

|             |     |                         |                                                |      |
|-------------|-----|-------------------------|------------------------------------------------|------|
| Rmajalis_1  | 294 | FTLHRLW <sup>H</sup> HN | WPDLSRD                                        | 9.51 |
| Rmajalis_2  | 408 | n. a.                   | WPDLTHS                                        | 9.08 |
| Rmajalis_4  | 114 | n. a.                   | n. a.                                          | 7.95 |
| Rmajalis_5  | 189 | n. a.                   | n. a.                                          | 7.06 |
| Rmajalis_6  | 231 | FTLHG <sup>F</sup> WPSN | n. a.                                          |      |
| Rmajalis_8  | 132 | FTVHGIW <sup>P</sup> TN | n. a.                                          |      |
| Rmajalis_9  | 189 | n. a.                   | WPS <sup>I</sup> MGK                           | 6.29 |
| Rmajalis_10 | 108 | n. a.                   | WPS <sup>V</sup> M <sup>T</sup> D              | 4.80 |
| Rmajalis_11 | 531 | FTIHG <sup>F</sup> WPSN | WPD <sup>L</sup> A <sup>D</sup> G              | 8.80 |
| Rmajalis_12 | 315 | n. a.                   | n. a.                                          | 9.70 |
| Rmajalis_13 | 441 | n. a.                   | WPNLERR                                        | 6.46 |
| Rmajalis_14 | 651 | FTLHGLW <sup>P</sup> FN | W <sup>K</sup> S <sup>Y</sup> N <sup>H</sup> I | 4.92 |
| Rmajalis_15 | 204 | FTIHGLWPSN              | n. a.                                          |      |
| Rmajalis_16 | 243 | n. a.                   | W <sup>R</sup> S <sup>Y</sup> P <sup>I</sup> A | 6.06 |
| Rmajalis_18 | 366 | n. a.                   | n. a.                                          | 6.20 |
| Rmajalis_19 | 150 | FTIHGLWPSN              | n. a.                                          |      |
| Rmajalis_20 | 645 | FTIHGLW <sup>P</sup> NN | WPDVKNA                                        | 8.74 |

---

# without introns

n. a. not available

In blue are amino acids not allowed in the motifs described in Vieira *et al.*<sup>47</sup>.

**Supplementary Table 3.** Location of the *SFB/SLFL/ SFBB* like sequences of *R. chinensis* chromosome 3, *R. multiflora* sc0006888, and *R. multiflora* sc0001861.

| F-box genes                   | Location |          |
|-------------------------------|----------|----------|
| Rchinensis_F-box-4            | 1507747  | 1509120  |
| Rchinensis_F-box-3            | 5375622  | 5376560  |
| Rchinensis_F-box-2            | 5433148  | 5434392  |
| Rchinensis_F-box-1            | 5475850  | 5477151  |
| Rchinensis_F-box+1            | 5558222  | 5559472  |
| Rchinensis_F-box+2            | 5618754  | 5619989  |
| Rchinensis_F-box+3            | 5720698  | 5722023  |
| Rchinensis_F-box+4            | 5734186  | 5735463  |
| Rchinensis_F-box+5            | 5751338  | 5752603  |
| Rchinensis_F-box+6            | 5803902  | 5805155  |
| Rchinensis_F-box+7            | 5808024  | 5809247  |
| Rchinensis_F-box+8            | 5856394  | 5857662  |
| Rchinensis_F-box+9            | 5879526  | 5880743  |
| Rchinensis_F-box+10           | 6536594  | 6537988  |
| Rchinensis_F-box+11           | 7143024  | 7144325  |
| Rchinensis_F-box+12           | 7149272  | 7150558  |
| Rchinensis_F-box+13           | 7425762  | 7426949  |
| Rchinensis_F-box+14           | 9568955  | 9570373  |
| Rchinensis_F-box+15           | 14254770 | 14255927 |
| Rchinensis_F-box+16           | 17725765 | 17727120 |
| Rchinensis_F-box+17           | 19789495 | 19790751 |
| Rchinensis_F-box+18           | 19818837 | 19820111 |
| Rchinensis_F-box+19           | 21203124 | 21204203 |
| Rchinensis_F-box+20           | 21569130 | 21570335 |
| Rchinensis_F-box+21           | 26018972 | 26020213 |
| Rchinensis_F-box+22           | 28383240 | 28384418 |
| Rchinensis_F-box+23           | 28397189 | 28398376 |
| Rchinensis_F-box+24           | 36186560 | 36187792 |
| Rchinensis_F-box+25           | 38266966 | 38268198 |
| Rchinensis_F-box+26           | 43723185 | 43724546 |
| Rmultiflora_sc0006888_F-box-4 | 15225    | 16445    |
| Rmultiflora_sc0006888_F-box-3 | 62159    | 63515    |
| Rmultiflora_sc0006888_F-box-2 | 122932   | 124119   |
| Rmultiflora_sc0006888_F-box-1 | 210234   | 211466   |
| Rmultiflora_sc0006888_F-box+1 | 310084   | 311322   |
| Rmultiflora_sc0001861_F-box-3 | 47382    | 48596    |
| Rmultiflora_sc0001861_F-box-2 | 141247   | 142485   |
| Rmultiflora_sc0001861_F-box-1 | 226346   | 227578   |
| Rmultiflora_sc0001861_F-box+1 | 253971   | 255152   |
| Rmultiflora_sc0001861_F-box+2 | 383393   | 384625   |

**Supplementary Table 4.** *R. chinensis* transcriptome data used in this study

| Tissue           | SRA Acc. number        |
|------------------|------------------------|
| Stamen           | SRX5973706, SRX5973707 |
| Pistil and Ovary | SRX5973701, SRX5973702 |
| Leaf             | SRX5973703, SRX5973704 |
| Stem             | SRX5973699, SRX5973700 |
| Root             | SRX5973697, SRX5973698 |

**Supplementary File 1**

>Rmultiflora\_1

ATGTCTCTAGGTTTCATATGATCATTTTTAAATTTGTACAACAATGGCCACCGCCGTCTGTGATACGTCTGGCTGCAAGA  
GATCGGGGTTATCACACTTCACGATCCATGGCCTTTGGCCAAATAATAAAACGTATGTGAAAAATCAACCGACTTGTCT  
TACCAGTCATGCCAGCTCATTTAATTCGAATTTGGTAAGCAAGCTGAGCACCTCTTGGCCCGATGTGAAAAATGCAAAT  
GATAATGATTTTTTGGAAACAAACAATGGGACAAGCATGGCACATGTTTCCTTGACAGACATACGACCAAGCACAACTTTCG  
AGCGGTCATACAACATGTGGAAAGAAACCAACCTGACAAACACCTTGAATAGCCTCATCAAACAGACACCGAGACAACA  
GAACGTCACAGATATAGAACAACCTCATTCAAGGAGTAAGTGAACCTGAAAAGAAACCCCTCCTCCGTTGTGAACAATCT  
CATAGTAATGCCAGTAAGTCTCTCTTGAAGAGATTGTCATTTGCTATGCACACAACGGGATTACTGTGATCGATTGCC  
TCAGTCGACCAAATCCACCTTCGAATGCTATGACGGATTTTGGTTTCCT

>Rmultiflora\_3

ATGCTTATTTCTACATTTGCTAAAGCCGCAAACAAATATGACTATCTACAACACTAGTGCAACAATGGCCTAAAACGTTCT  
GCCATAATAACCGAGCTTGCAATCAAGGTGCAGTCTCCCGGAGCTGTTCTCGATACATGGTATGTGGCCATCTAATTT  
CTCCGGCCAGAACGACGCTTGTGTTGGAACCTCGGTTGAGCATGAGAGAGATGCGTCGACACAATCATCTCGAAACTCAA  
TTGCTGTCATCCTCATGGCCAAGCTACACTGGTCTGTCCAACCTGCACTTTTGGGAGTATGAGTATAACAAGCACGGCA  
CTTGTTCAGAGAATAACCTCAACAGACGGACTATTTTACCAGAGCCGACGCTTTGTGGAGGCGCTACAATGTTACCAA  
TATGCTTTTAAACATCGCGCCACCAAATCTCGCCGGGATCCTCCTATCGTTACGCTGACATTTTGTATGCCATTTCGACAA  
GGAATTGGGGGATACACTCGTTTTGATTCTTTGCAAGAAAGATCCGGCAAATAATATTTGGATTCTGCACGAGGTGATAA  
TTTGTTCGATCCCTTGGGGAATAACGTCATCGCTTGTGCGAGAAGATCGAGATATAGTTGCAACAGCGGG

>Rmultiflora\_4

TCACAATTAATTTCCACAGGGTCTATGACTATTTCAAATTTGTTGTACAATGGCCACCAGCCACTGCAGTGTTTTTTA  
AATGCCACAATAGTAACCCGCCACACATTTACACCATCCATGGCCTATGGCCAAATAATCGTTCTAAGGCAGTCGGGAA  
TAAGTGCCAGGGATCGTCATTTCAAAGCCGGCTCCTCCATTGGAAGCCAAACTGAAAGATCTCTTGGCCTAACCTAGAA  
AATTCGAGTGATGCGCACTTTTGGGAACTTCAGTGGAACAAACATGGCAAGTGTTCGGAGCCGACATTTACGCAATCCC  
AATACTTCGATCGAGCCCATCAAATTTGGATGATGGAGAAATTAATATTAAGTATCCTCCAAAATGTAAACATCGT  
ATCAGGGAAAACAAAAGCTACGAAGAGATAGAATTTCCCATTTGAATCAAAAACCTCACAAGACACCACTCCTTCACTGC  
ATAAACACTCAGAAGTTGCATGAAGTGGTACTTTGCTGGGACCATGCTGCAAAAAAATGATCGACTGTAAACATACAG  
AAGCAACATGCTCAAGGAATAGTCCAATTGAGATTCTA

>Rmultiflora\_6

ATGCAGAGCCATACGAATACCTACAGTTTGTCTTGCAATACCCTAGAGGTTTACTGTGTTAACGACAAGAAATGCATTC  
CACCGGCGAGCTTGCCAGCCAAATTCACGGTTCATGGAATTTGGCCACGAATATTTCCGAGCCGATTATCAGCTGTGA  
CAAGGCACATAAACTACACTCGTTCAACGGAAATCTGATAACTCCGTCGTTGAAAACCGATCTTCTCCAATCTTGGCCC  
AGCGTCGTGACAAATAAAGATGATATGTCGTTTTGGGAACACGAATATAATAAGCATGGGTCTGTACTGCACCAGCTA  
TCACTCAGACAGCGTATTTTGGAGAGCTCACAAGTTCTGGAAGGAGTATGATCTCTATTTCCATTTTGGAAACAAAAAA  
TATCAAGCCGGGGCAATCTCGATCGTATTTACTGGCTGATTTTGAAGCAGCCGTCAAGTCCAAGATCAGTACCGACACA  
AAACCTCTCATCCTTTGTAAGCAGGACAACTAACTCGTGGGAGCACAACAACCAACTTCATTTTGGAGGAAATTTGTGA  
TCTGTTTCGATCACCAGGGGACAAATCTGGTCAATTGTACCCGATCAACAGATTGTGACCAGAAGCAGAAGATATACTA  
CCCT

>Rmultiflora\_8

CAATACTCATTTGTTTTTGTGTCAAGGCCTCATTTTGGAATTTAATGTTTCGTTTTGTTTCTTGTCAACAATTAATTTCCA  
CAGGATCGTATAAATATTTCAAATTTGTTGTACAATGGCCACCAGCCACTGCAGTGTTTTTAAATGCCACAATAGCAA  
CCCGCCAAAGATATACACCATCCATGGCCTATGGCCAAGTAATCGTTCTAATGCAGCTCGCAGTAAGTGCCAGGGATCG  
TCATTTCAACAACCGGCTCTTCCATTGGAAGCCAAACTGAAGATCTCTTGGCCTAACCTAGAAAATTTGAGTGATGCGC  
AGTTTTGGGAACTTGAATGGAACAGACATGGCAAGTGTTCGGAGCCGACATTTACGCAAACCCAATACTTCAATCGAGC  
CCATGAAATTTGGATGATGGATGACATTAATATTACTGATATCCTCCAAAATGTTACATCGTATCAGGGAAACAAAA  
ACCTACGCAGAGATAGAATTTCCCATTTGAATCAAAAACCTCAAAAGACAATCCTCCTTCGCTGCCTAAACCCCTCAGAAGT  
TGCATGAAGTGGTAATTTGCTGGGACCATGCTGCAAAAAATATGATCGACTGTAATCGTACAGAAGCAACATGCTCAA  
CAGCAGTCTAATTGATGTTCTA

>Rmultiflora\_9

TACCCACCTGGAGTTTGGCTATGACACATCAAAGGTTATTGATCTCACCTCTGCCAACCAAGTTCCATGTACATGGAA  
TATGGCCTTCTAACTTCTCCGATATACATGTCACCTTTGATATGTTTTTCTAATTGTATCTTTTTATTTTCAGATGACACC  
TCTGCAGACGGATTTGGTAAACTCATGGCCGTCCGTGTTAACAACAAGAGCAATATGTGGTTCTGGGAGCATGAGTAC  
AAGAAACATGGCGCATGTACAGTAGAGTCAGGTGTACCACCTTTCACTCAAAGTCTTACTTTGAGAAAGGACACCAGC  
TATGGAACCAATATGACATCCATTGAGTCTTGTCAAAGTGGTATTAAGCCGAGTACTGCAACGTACATACACTATGAC  
TCAGCTTGTAAACCGCAATCCAAAAGAAAATCAGGACTAGCAATACTCCTTTAATCCTGTGACAGGAGGACAACCCCTGGT  
GACACACTAAAGGAAGTGGTAATCTGTCTGGATTACCAGGCAACAATGTGATAAGTTGCGCGCTCAGTAAAAGGAAAA  
CAGATTGCCAGGATCCTTCGGCAAGGTATACTATGTAGCT

>Rmultiflora\_11



ATGAAAACCCCAGCAGCAGTCTGTCTTATTTTCTTGCTTTCTGTTATTCTGCTCAAGGGTCCCACGCAGAGCCATACG  
AGTATCTACAATTTGTTTTGCAATACTCCAAAGGCTACTGCTACAACACCCAGATATGTTTTGCGAGGTTGCCAAAAAT  
GTTTACCATACACGGTGTCTGGCCCGCAACATTTCCAATCCCCTGGTGAGATGTAAACAGTCAAAGAACTACACCAG  
TTCAAGCAAAACATGACAACATCACTGCAAAACGATCTTGCCCAATCTTGCCCAATGTCGAAAGAGCTAAAACCAATA  
TAGGGTTTTGGAAAGAGGAATACGAAAAGCATGGGTCTTGACTGCACCAGCTATCACACAGAAAGCGTACTTTGAGAG  
AGCTCACGAGCTGTGGAAGGAGTATGATCTCTATAACAATTTGGATAAAAAGCAGATCAAGCCGGGGCACTCATATGCA  
CTCACTGATTTTGAAGCAGCCGTCAAGTCCAAGATCGGTACCGATAACAATACCTCTCATCCTGTGCAAAGAGGACACAC  
TAACTACTGGGAGCAGCACAACCTGGATTAATTCTGAGGGAAAATAGTTATCTGTTTTCGATCACCAGGGAACAAATCTGGT  
CAATTGTACCCGGCCGACAGATTGCAAGCGGCAGAAGAGCACAACCTAAAGACAACATGATATACTACGTACCT

>Rmultiflora\_15

ATGAAGAATTCAAACCTTCATTATCCTTCTATCAGTATATGCACTTGTACAAGTTCTCAACGTTTTCAAATGCTGAACCCT  
ACGAGTACATGCAATTTGTACTCCAGTACCCACCTGGAGTTTGCTATGACAAATCAAAAAGGTGATTGCATCTCACCTCT  
CCCAACCAAGTTTTCATGTACATGGAATATGGCCTTCTAACTTCTCCAATATACTTGTCCCAATATGTTTTTCTAATTGT  
ACCTTTTTATTTTTCAGATGACACCTCTGCAGACGGATTTGGGAACTCATGGCCGTCCGTGTTAACACAAAACAACAATA  
TGCAGTTCTGGGAGCATGAGTATAGACAGCACGGTGCATGTGCAGTAGAGTCAGGTGTACCACCTTTCACTCAAAGGTC  
CTACTTTGAGAAAGGACACCAGCTATGGAACCAATATGACATCCTTGCAAGTGGTATTAACCCGGGT  
ACTGCAACATCATACTATGACTCAGCTTGTAAACCGCAATCCAAAAGAAAATCGGGAGTAACAATACTCCTTTAATCA  
TGTGCAGGAGGACAGCCCTTGGTTACACACTAAGGGAAGTGATAATCTGTCTGGATCACCAGACAACAAATGTGATAAG  
TTGTGCGCTCAATAATATTAGAAAACAGATTGCCGAGATCCTTCGGGCAAGGTATACTATGTAGCT

>Rmultiflora\_16

ATGGCATTGCTAAGTACAATAGCCGTGCTGCTTGTCTTTTCTGCTTTTTTCATCAGGTGCTAAAGCCGCCAATAAGTACGACT  
ACTTCCAGTTTGTCCAGCAATGGCCGGCTACATTCTGCTATCAAAATTCGGATTGTGTCCGGAATCCCCCGCGGAATAC  
TTTTACCATCCACGGCCTCTGGCCAAGTAATTACACTGCACCTGAAAAGCCATGCATGTTTGCTGCCCCAAAACCATGGT  
TTGAAAAACTATTTTCTGCCGCAAGCATGGCCCCAGTTAATTGCTCGTTTACCGACATGCAATTCTGGCAGACCGAAT  
ATAACAAGCACGGTACATGCTCGGAGAACAACCTCAAGCAGACGGAGTATTTTAGAACAGCTCACTGGGCGTGGGTTCG  
ATTCAATGCATATTTTCTGTTTGACAGCTCGCCTCTCCAAATCCACCCTGGTAATTACTATTTTAAAGCTGACCTTGAA  
CAAGCCATTCGGACAGTCACTACTAAGGACCCTCTGCTTACGTGCAAGAAGATCAAAACCATGGGCATTGATACGTGGA  
TATTGCAGGAAGTCATAATCTGTCTTGATGTTTTGGGAGTCCAACCGGTCCCTAGTGGCCCTCGATTACCAACTTGCCG  
TGGTCCAATAATATATTATGGTTACCAACTAATTTATATA

>Rmultiflora\_21

ATGATCAGAGATGCGGTCCGACAGCCGGTCCCCAGCCTGTCCGAGAGCTGGTCCCATCACTCCCATGGAGGTTCCGGAC  
GGCCGTATTATGAGTACCTGCGATTTGTACTGCAAGTTCCAGAACATTGAATCCAAGCTCAACACTTAACCAGAAATTT  
CACCATTATGCGCCTATGGCCTAGCAATCACAGCACTCATAATGGTGGAAATTCCTTATGTTCAAATTTGTGATCCAAAT  
TATATCCTTGATCCTCAACAGGAGCTCAGTCACTCTTGCCCGATGTAAAGCCGACTGCAAACGATTGCAAGTTTGGGA  
CCGACGAATACAGGAAGCACGGCACCTGCGCAAACCGTATATCCGTACACCAGGGGATTACTTTAGAAAAGCAGATGA  
CTTGATCGCAGTCATCCCATACAACGTTTTTTTAACTATTCGCCGACCACATCCGCCAGGACAGCAAGTCCCCGTG  
AGCACATTTAATCTCGTACCAACGGCGACAGCAAGGAAGATGCACGACTGTGGTGCAATTGGAATGGAACCCCTCT  
ACCTACTGAAGGAAGTAGTTATTTGTTACAATAACACCTCGTTTGGTTCACGAAATGAATTTCTTAGAAAAGTTGATCC  
TTTGATTTCTATCGGGAAGGGAAAATTAAGATTCCTACTAATGTGTTTGATAACACTAAAAAATGGAATCAATAAT

>Rmultiflora\_24

ATGTCTTCATTTCTCACCATTTTCTCTGTTTTCAACTGCTCCTAGCGGTGCCAAATCCACTTCGAGAGAAAAATTTAG  
CTCCTGATTCCTTCTGTGGTAATTTGTTGGCCCAATACCTTCTGTCTTTTTTCAGAGCAATCCATGTCAACAGCTTCC  
ACAATCTTTTACGTTACACGGATTGTGGCCGACAGCGGAAGGTTCCCTCGTTGAAATGTACGAGTGTACCAATGATTGAT  
AGCATCTTAAAAGGCAACAAAGATGATTTGGAAAGGTATTGGCCAAACTTGAAGCACACAAAGTTGATGAGAGTAAAA  
AATTCTGGATTAGTGAAGTGGATTAAACATGGTAGCTGCTCCGCAAAGACTCCTGCTAATTACTTGAAGCCTGGTTTTTGA  
TCTAATGAAGAAAATCAAGAAAATTTGATGTGAAAAAGATATTTGAAAAGCACGGTAAGATA

>Rmultiflora\_25

ATGGGTGGAGCAACAGTGGCATCAGTCATTGTGCTATTTTTCTTCCACTCGGTGTGATTGGAAATGCGGTCCGGACAGC  
CGAATCACAATTATGACTACATGCAATTTGTGCAGCAATATCCCAAACATTGAATGTAAGCTCAGAATATAACCGAGCG  
TTTACCATTATGCGCCTATGGCCTAGCAATTCCTTCGGCTACGGTCTGATCTACATTGTCAAACACCATATGCTAAC  
CGTTATCAACTTTTCAGGACAGCTGACCAACGAACCTCAGAAACACTCTCAGTTACTCTTGCCCAATGTTTACTACTATT  
GGCAGTTACAAAGTTTTCAAACAATTTGATCTTTTTGGTACAACGAATACCAGAAGCACGGCAGCTGCGCTGTGGCCCT  
TCTGGGTATATTTCCAAACAGCGCAGGCTTACTTTGAAAAGAGCACATAAGTTGTGGGAAGCAAATGATTTGTATGGTGTA  
TTCGTCAACTACAACATCCACCCGGGAGACCGAGTCGACGCTAGCAAATTTAGGACAGCCCTGAGAATTCGACTGGAT  
GGAACGCTCGACTGTGATGCACTGGAACCGGCCTAATGATGGAAGTAGTTATTTGTTATGATATTCATGCAACTCGAGT  
GAGGAATGTCTTAGACCGGGAAATTTGACGGGGCTTATATCATATCCAAAA

>Rmultiflora\_27

ATGGAAATCATTATTTCTTGCTTTCATATTATTTTATTTCCCGCAACTGTGCCAGCACAGACAAAAGGTTACGAGT  
ATATCATGCTGGTCTCCAAAATCCTTTTAAACAGGAATGGCGCTAGTCCTTGGACCATAACATGGCCTGTGGGCCGAGAG  
ACTTCAAGGACCATCTCCTAACTATAAATTTGTTCCAGTTAATAGTATTAATAGCGACATTGAAGCTGCACATAATTAAA  
GCTTGGCCCAGTATTATGGGTAAACCAAACCAAAGAGTTTGGGAACATGAATGGAGAAAACACGGTTCATGTACCACAG  
ATTTATTACCAACTTCTAATGACTACCTACTGAAAGGAGTTTACCTGTGGGAGCAAATCAAGTTTCATGATTTGATGGG  
TGTGGGTCCGGGTGCCCAATTTAAGCCAAATACTCAATATGATGCGAACACGGTGCTGGCGGCCATCACAAGCAAATAC  
AAGGTCAAACAATGCTGACCTGTCAGGGTGGGGAAATATTGGATGTTAGGTTTTGTTATTTAGGACCTTGGGTACTGG  
TAGATTGCCTGGACACCCAACCACCTCCCCATACAGTTTGTACAGTTTAAATTTATTATCCTAGAATA

>Rmultiflora\_28

ATGGAAATCATTATTTCTTGCTTTCATATTATTTTATTTCCCGCAACTGTGCCAGCACAGACAAAAGGTTACGAGT  
ATATCATGCTGGTCTCCAAAATCCTTTTAAACAGGAATGGCGCTAGTCCTTGGACCATAACATGGCCTGTGGGCCGAGAG  
ACTTCAAGGACCATCTCCTAACTATAAATTTGTTCCAATTAATAGCGACATTGAAGCTGCACATAATTAAAGCTTGGCCC  
AGTATTATGGGTAAACCAAACCAAAGAGTTTGGGAACATGAATGGAGAAAACACGGTTCATGTACCACAGATTTATTAC  
CAACTTCTAATGACTACCTACTGAAAGGAGTTTACCTGTGGGAGCAAATCAAGTTTCATGATTTGATGGGTGTGGGTCC  
GGGTGCCCAATTTAAGCCAAATACTCAATATGATGCGAACACGGTGCTGGCGGCCATCACAAGCAAATACAAGGTCAAA  
ACAATGCTGACCTGTCAGGGTGGGGAAATATTGGATGTTAGGTTTTGTTATTTAGGACCTTGGGTACTGGTAGATTGCC  
TGGACACCCAACCACCTCCCCATACAGTTTGTACAGTTTAAATTTATTATCCTAGAATA

>Rchinensis1\_6\_Rchinensis2\_1

ATGTCTGGTATTTCGTATGACGATCCTGAATGGGGTGGCTCTTGCATTTGTTCTTTCTTGTGTATCCCCATGTGCACCG  
GTTTCATATGATCATTTTAAATTTGTACAACAATGGCCACCGGCCGTCTGTGATACGTCTGGCTGCAAGAGATCGGGGTT  
ATCACGCTTCACGATCCATGGCCTTTGGCCAAATAATAAAACGTATGTGAAAAATCAACCGACTTGTCTTACCAATCGG  
GCCAACTCAATTAAGGCTACGATACTCACTAGTTTCGAATTTGGTAAGCAAGCTGAGCACCTCTTGGCCCGATGTGAAAA  
ATGCAAAATGATAATGATTTTGGAAACAACAATGGGACAAGCATGGCACATGTTTCTTGCAGACATACGACCAAGCACA  
ATACTTCGAGCGGTACATAACAATGTGGAAAGAAACCAACCTGACAAAAACCTTGGATAGCCTCATCAAACAGACACCG  
AGACAACAGAACGTACAGATATAGAACAACCTCATTCAAGGAGTAACTGCAACTGAAAAGAAACCCCTCCTCCGTTGTG  
AACAATCTCATAGTAATGCCAGTAAGTCTCTCTTGAAGAGATTGTCAATTTGCTATGCACACAACGGGATTACTGTGAT  
CGATTGCGTCAGTCGACCAAAATCCACCTTCGAATGCTATGACGGATTTTGGTTTTCT

>Rchinesis1\_1\_Rchinensis2\_12

ATGAAAATCCCATTCCCCATCTTCTGTTTGATACTCTCTGCTCTCATAAGCCTGTCAACAACCTATTCTAACCGCTCAAG  
AAAATCCTGTTTCTTCTACATTGCTTATCAGTGGCCAGGCTCATACTGTGCAGCAGCAAAGCAGGGTTGTTGCTACCC  
AAAGAGTATTAGAAAACATCCCAGTTTCACTATTGGTGGCATAATGGCCTTACACTTTTCTGGGGATAGACCAACCTAC  
TGCAAAATCAAGACCCCTTTTAGTTTATCTAAGATATCAAACCTGACCAAGAGTTTGGAAAGGAATTGGCCGGCCATCA  
CTATCTGCCCAAGCCGTAC

>Rchinesis1\_3\_Rchinensis2\_27

ATGGCAATGTTGAAATCATCGTTCGCTTTAATTGCTCTTGCTTTTGTCTCTGTTTCACTATGAGCATTGGTTCCTATG  
AATATTTTAAATTTGTGGTACAATGGCCACCAGCCCCTGCAGGGTTAGAAAATGCACACCCCAAGCCTTGCAACAGAA  
AATTTACACCATCCATGGCCTATGGCCGAGTAATTATTCTAAAGCTGTTGTGTATAATTGTCCGGGATCGTCTTTTCAA  
AATCCGGTCTCTCCATTGGAAGCCAACTGAAGATCTCTTGGCCCAACCTAGAACGTCCGAACGATGCAATGTTTGGG  
CACTTGAGTGGGACAGGCATGGCAAGTGTTCGGAGCAGACATTTACACAAACCAATACTTCAATCGAGCCCATGAAAT  
TTGGGTGGGGAAGAATATTACTGACATCCTCCAGAGAGCTAGCATCTTATCGGGGAGACAAAAGACTACGGAGTTATA  
GAATTAGCCGTACGATCAAAAACCTCAAAGACACCCCTCCTTCGCTGCGAACAACCAAAGCAGAAACCTACGCAGAAAC  
CTACGCAACCTACGCAGCGGACTCAGTGGTTGCATGAGGTGGTACTTTGCTGGGACTATCATGCCAAAATATGATTGA  
CTGTGATGATACAGAAGCAACATGTCAAGATACTTTTCCAATCGATATTCTG

>Rchinesis1\_4\_Rchinensis2\_15

ATGAAAACAGCAGCAGTCTGTCTCCTTTTCTTGCTCTCTGTTATACTGTTCAAGGGTTCATGCAAAGCCATACGAAT  
ACCTACAGTTTGTCTTGCAATACCCTAGAGGTTACTGTGTTAACGACAAGAAATGCATTTCCACCGGCGAGCTTGCCAGC  
CAAATTCACGGTTCATGGAATTTGGCCCACGAATATTTCCGAGCCGATTATCAGCTGTGACAAGGCACAGAACTACAC  
TCGTTCAACGGAAACCTGATAACTCCGTCGTTGAAAACCGATCTTCTCCAATCTTGGCCCAGCGTCGTGACAAAATAAG  
ATGATATGTCGTTTTGGGAACACGAATATAATAAGCATGGTTCCTGTACTGCACCAGCTACTCAGACAGCGTATTT  
TGAGAGAGCTCACAAGTTCTGGAAGGAGTATGATCTCTATTCCATTTTGAACAACAAAATATCAAGCCGGGGCAATCT  
CGATCGTATTTACTGGCTGATTTTGAAGCAGCCGTCAAGTCCAAGATCGGTACCGACACAAAACCTCTCATCCTTTGTA  
AGCAGGACAACTAACTCGTGGGAGCACAACAACCAACTTCATTTTGGGGAAATTTGATCTGTTTCGATCACCAGGG  
GACAAATCTGGTCAATTGTACCCGATCAACATATTGTGACCAGAAGCAGAAGATATACTACCT

>Rchinesis1\_8\_Rchinensis2\_25

ATGAAAACCCAGCAGCAGTCTGTCTTATTTTCTTGCTTTCTGTTATTCTGCTCAAGGGTTCACGCAGAGCCATACG  
AGTATCTACAATTTGTTTTGCAATACTCCAAAGGCTACTGCTACAACACCCAGATATGTTTTGCGAGGTTGCCAAAAT  
GTTTACCATACCGGTGTCTGGCCCGGAACATTTCCAATCCCCTGATGACAACATCACTGCAAAACGATCTTGGCCAA  
TCTTGGCCCAATGTGCAAAGAGCTAAAACCAATATAGGGTTTTGGAAAGAGGAATACGAAAAGCATGGGTCTTGTACTG

CACCAGCTATCACACAGAAAGCGTACTTTGAGAGAGCTCACGAGCTGTGGAAGGAGTATGATCTCTATAACAATTTTGGAT  
TAAAAAGCAGATCAAGCCGGGGCACTCATATGCACTCACTGATTTTGAAGCAGCCGTCAAGTCCAAGATCGGTACCGAT  
ACAATACCTCTCATCCTGTGCAAAGAGGACACACTAACTACTGGGAGCAGCACAACCTGGATTAATTCTGAGGGAAATAG  
TTATCTGTTTCGATCACCAGGGAACAAATCTGGTCAATTGTACCCGGCCGACAGATTGCAAGCGGCAGAAGAGCACAAC  
TAAAGACAACATGATATACTACGTACCT

>Rchinesis1\_11\_Rchinesis2\_23\_Rchinesis3\_5

ATGAAGAATTCAAACCTTCATTATCCTTCTATCAGTATATGCACCTTGTACAAGTTCTCAACGTTTCAAATGCTGAACCCCT  
ACGAGTACATGCAATTTGTACTCCAGTACCCACCTGGAGTTTGCTATGACCAATCAAAAAGGTCATTGCATCTCACCTCT  
CCCAACCAAGTTTCATGTACATGGAATATGGCCTTCTAACTTCTCCAATACACTTGTCCGTTGTGGGCACGCACTGAGG  
AATAACCCCTTTCATAAGGTGCAGATGACACCTCTACAGACGGATTTGGGAAACTCATGGCCGTCGTTGTTAACACAAA  
ACAACAATATGCAGTTCTGGGAGCATGAGTATAGAGAGCACGGTGCATGTGCAGTAGAGTCAGGTGTACCACCTTTCAC  
TCAAAGTCTACTTTGAGAAAAGGACCAACTATGGAACCAATATGACATCCTTGCAGTGCTTCGTCAAAGTGGTATT  
AAACCGGGTACTGCAACATCATACACTATGACTCAGCTTGTAACCGCAATCCAAAAGAAAATTGGGAGTAAACAATACC  
CTTTAATCATGTGCAGGAGGACAGCCCTTGGTTACACACTAAAGGAAGTGATAATTTGTCTGGATCACCAGGCAACAAA  
TGTGATAAGTTGTGCGCTTAATAATATTAGAAAAACAGATTGCCGAGATCCTTCAGGCAAGGTATACTATGTAGCT

>Rchinesis2\_5

TTTGTCCGGCAATGGCCGGCTACATTCTGCTATCATAATTCGGATTGTGTCATCCCCCGCACAGTACTTTTACAATTCA  
TGGCCTTTGGCCAATATGAACTTGATCAGATGTTTGCTGCCCAAACCATGGTTTGAAGACTATTTTCTGCCGCAAGC  
GTGGCCCCAGTTAATTGCTAGTTTCACCAACATGCAATTCGTGCAGAGCGAATATAACAAGCACGGTACCTACTCGGAG  
AACAACTCAAGCAGACGGAGTATTTAGGACAGCTCACTCAATGCATATTTTCTGTTTGCACACTCGCCTCTCCAAAT  
CCACCTGGTAAAGCTGACCTTGAACAAGCCATTCGGGCAGTCACTACTAAGGACGCTCTGCTTATGTGCAAGAAGATC  
AAACCCATGGGCATTGATACTGGC

>Rchinesis2\_6\_Rchinesis3\_15\_Rchinesis4\_7

ATGATGTCCTCATTCTCACCATTTTCTCTGTTTTCAACTGCTCCTAGCAGTGCCAAATCCACTTCGAGCGAAAATTT  
CAGCTCCTGATTCCTTCTGTTGTAATTGTTTGGCCCAATACCTTCTGTCTTTTTTTCAGAGCAATCCATGTCAACAGCT  
TCCACAATCTTTTACGTTACACGGATTGTGGCCGACGGCGGAAGGTTCTCGTTGAAATGTACGAGTGTACCAATGATT  
GATAGCATCTTAAAGGCAACAAAGATGATTTGGAAAGGTATTTGGCCAACTTGAAGCACACAAAGTTCGATGAGAGTA  
AAAAATCTGGATTAGTGAGTGGATTAAACATGGTAGCTGCTCCGCAAAGACTCCTGCTAATTACTTGAGCCTGGTTTT  
TGATCTAATGAAGAAAATCAAGAAAATTTGATGTGAAAAAGATATTTGAAAAGCACGGTAAAGATA

>Rchinesis2\_7\_Rchinesis3\_11\_Rchinesis4\_4

ATGATTAATACGAGAGCAAAAAGAAATCTCGTTTTCACTCTTCAACGGGCTTTGGCCCTTCAACGCCACTCAATTAGATCCAA  
ACAATATTAATTCTGATTTCCAGTATAGACCTATCATAGAGGGTGGCCAGTTACCTATTGTCTTACTATATAAACTCGC  
AAAATCTTGGAAAAGTTATATGCGTAGCTATCCGAATGGGGATTTTTGGAAAGATGAATACGACAAGCATGGAACATGC  
ACCGTTAAAAAATTTCTGACACCTGTCGAGTACTTCCAGAAGGCAATGACTTGTGGGAAGCCAACCAATAGAGGATT  
GGTTTCGGCGTGATGGTCGCTTACAGATACAGATGTCCAGCTCGCTGAGCTGAGAGGCGGATCATGAACAAGTTCGG  
TTCTGTGCCATGGTTTTCAGTGTGAGGACAAATTTGTGCGGCAGATAGGCTTGTGTTTTGATGAGGTTGGAGGGTTGGGT  
GCGAATGTCCTAAAGAATATCAAAGAAGCAATGCCCCCTACTATACAGTATAGATTG

>Rchinesis2\_8\_Rchinesis4\_12

ATGGTCTACAGAATCCTTCGACCTTAAAAGGCAAGGCTCCCTGGGGCATAACATGGTATTTGGGCAGAAAAACTTGATC  
CACTTGTAGGGCCATCTCCACAAAGGTATAAGTATGTGCCAGTTCAATCGTGTCAATCATTTCCTCCATTTGACCCATA  
GATTAGTCAAAAAATTACAAAGGCACTCGATAAAGCTTGGTTCGAGTCTTTCGGCTACGTGGCCAAACGTTAAATTTTG  
GAACATGAATATAACAACACGGTTCATGTATCGTAGATTTATTACCAACTTCTACGGATTACCTAATGAAAGCACTTT  
ACCTGTGGGAGCAACTCAAGTTTACGAGGTGATGGGTAAGGGTAAGCAATTTGAGCCAAATACACTATACAAAACCGA  
GGATATCTTAAGGGCATCAAAGTTTACATAATGTTTCGACCAGAATTGACCTGTATCGGTAATAAACTAACAGATGTT  
AGGTTTGTGCATACAAGAAATTTGGGTATTGGTAGATTGCGAGGGCATCAAACATCTTGTACAGGTCAAATTAATATG  
TTAGGCAAGTG

>Rchinesis2\_11\_Rchinesis3\_13\_Rchinesis4\_38

ATGAGAACCAGCAGTCTGTCTTATTTTCTTGTCTCTGTTGGTCTGTTCAAGGGTTCCCATGCAGAGCCATTGCAAT  
ACCTACAGTTTGTCTTGCAATACGCTAGAGGTTTCTGTGTTAACGTCAAGAAATGCATTCACCGGCGAGATTGCCGGC  
CAAATTCACGGTTCATGGAATTTGGCCACGAATATTTCCAAGCAGGAGGTGATCGAGTGTACAGCTGCCGTGAAACTA  
CACTCGTTTCGACGGAAACCTGATAACACCGTTCGTTGAAAACCGATCTTCTCCAATCTTGGCCAGCGTCCGGAGAGATA  
AAGATAATATGACTTTTTTGGGAACCAAGTATAATAAGCATGGGTCCTGTACTGCACCAGCTATCACTCAGACAGCGTA  
TTTTGAGAGAGCTACAAGTTCTGGAAGGAGTATGATCTCTATTCTGTTTTGGAACAAAAAAATCAAGCCGGGGCAGT  
CTCGATGGTATTCAGTGGCTGATTTTCAAGCAGCCGTCCAGTCCAAGATTAGTACCGATTATATACCTCTCATCCTGTG  
CAAGGAGGAAGCAT

>Rchinesis2\_16\_Rchinesis3\_17\_Rchinesis4\_40

ATGTCTACAGGGTATTACGAATATTTCAAACCTTGTGCAACAATGGCCACCAACCACTTGCCAAAATGCAAACCTGCCGCA  
GAGTACCGCCACCTCGCCTCTTTACCCTCCATGGGTTTTGGCCATCTAATTATTCAAACAATGTCGTGGCTAATTGCAC

TAACGCAATATTTCAACGGATGGATCGCTCATTGGTATCTAAACTGAATATATCCTGGCCCAATGTGAAATATCCGAAT  
AATATCCAGTTTTGGGATAAACAGTGGAGAAAACATGGCTCATGTTCCGTGCACACGTTTAACCAAACAGAGTACTTCA  
CGCAAGCGGATAATCTTTGGAACACACAACATTACTGATATTTCTTATAACTGGTGGGATCAAGCCAAATGGATCAGA  
ATATGCATACGATACGGTAGAGCGGCCATCCAAATTGCAACCGGGAAGGAACCCGAACCTCGTTGCGCACCATCTCC  
CTTGGAAGGCAATTGTTGCATGAAGTAGTACTTTGTTATAATCATAAGGGAACAACGCCCATCGACTGTAACCCTTAC  
ATTCAACCTGCGATCGTAACCTTCCAAATAAAGTTTATT

>Rchinensis2\_18

ATGCTGGTCCCTCCAAAATCCTTTTAAACAGGAATGGCACTAGTCCCTGGACCATAACATGGCCTGTGGGCCGAGAGACTTC  
AAGGACCATCTCCTAACTATAAAATTTGTTCCAGTTAATAAATGTCCATCAGCCCTCCATTTAACCCTGAGATTAATAG  
CGACATTCAGCTGCACTAATTAAGCTTGGCCCAGTATTATGGGTAAACCAAACCTAAAATTTTGGGAACATGAATGG  
GGAAAACACGGTTCATGTACCACAGATTTATTACCAACTTCTAATGACTACCTACTGAAAGGAGTTTACCTGTGGGAGC  
AAATCAAGTTTCATGATTTGATGGGTGTGGGTCCGGGTGCCCAATTTATGCCAAATACTCAATATGATGCGAACACGGT  
GATGGCGGCCATCACAAGCAAATACAAGGTCAAACAATGCTGACCTGTGAGGGTGGGGAAATATTGGATGTTAGGTTT  
TGTTATTTAGGACCTTGGGTACTGGTAGATTGCCTGGACACCCAACCACCTCCCGGTACAGTTTGTACAGTTTAAATTT  
ATTATCCTAGAATA

>Rchinensis2\_24\_Rchinensis4\_33\_Rchinensis3\_4

ATGAAGAATTCAAACCTTCATTATCCTTCTATCAGTATATGCACTTGTACAAGTTCTCAACGTTTCAAATGCTGAACCCCT  
ACGAGTACATGCAATTTGTACTCCAGTACCCACCTGGAGTTTGTCTATGACCAATCAAAGGTCATTGCATCTCACCTCT  
CCCAACCAAGTTTCATGTACATGGAATATGGCCTTCTAACTTCTCCAATACACTTGTCCGTTGTGTGCACGCACTGAGG  
AATAACCCCTTTCATAAGGCGCAGATAACACCTCTGCAGACCGATTTGGGAAACTCATGGCCGTCCGTGTTAACACAAA  
AAAAAATATGCAGTTCTGGGAGCATGAGTATAGAGAGCACGGTGCATGTGCAGTAGAGTCAGGTGTACCACCTTTCAC  
TCAAAGGTCCTACTTTGAGAAAAGGACACCAGCTATGGAACCAATATGACATCCTTGCAGTGCTTCGTCAAAGTGGTATT  
AAACCGGGTACTGCAACATCATACTATGACTCAGCTTGTAAACCGCAATCCAAAAGAAAATCGGGAGTAAACAATCTC  
CTTTAATCATGTGCAGGAGGACAGCCCTTGGTTACACACTAAAGGAAGTGATAATCTGTCTGGATCACCAGGCAACAAA  
TGTGATCAGTTGCGCGCTCAATAATATTAGAAAAACAGATTGCCGAGATCCTTCGGGCAAGGTATACTATGTAGCT

>Rchinensis2\_28

ATGAAGAATTCAAACCTTCATTATCCTTCTATCAGTATATGCACTTGTACAAGTTCTCAACGTTTCAAATGCTGAACCAT  
ACGAGTACATGCAATTTGTACTCCAGTACCCACCTGGAGTTTGTCTATGACAGATCAAAGGTTATTGCATCTTACCTCT  
GCATGCCAACCAAGTTTCATGTACATGGAATATGGCCTTCCAACCTTCTCCGATATAGAATGATATATTTTTCTAATTGT  
ATCTTTTATTTTTCAGATGACACCTCTGCAGACGGATTTAGTAACTCATGGCCATCCGTGTTAATAACAAAGAGCAATA  
TGTGGTTTTGGGAGCATGAGTACGAGAACCATGGCGCATGTACAGTAGAGTCAGGTGTACCACAATTCCTCAAAGTC  
CTACTTTGAGAAAGGACACCAGCTATGGAACCAATATGACATCCATTCAGTGCTTGATCAAAGTGGTATTAACCAAGT  
ACTGCAAAATCATACTATGACTCAGCTTGTAAACCGCAATCAAAGAAAATCGGGAGTAAACAATACCCCTTTAATCA  
TGTGCAGGAAGAAAAAACTTGGTTACGTACTAAT

>Rchinensis2\_29

ATGATCAGAGATGCGGTTCGGACAGCCGGTCCCCAGCCTGTTGGAGAGCTGGTCCCATCACTCCCATGGAGGGTTCGGAC  
GGCCGTATTATGAGTACCTGCAATTTGTACTGCAAGTTCCAGAACATTGAATCCAAGCTCAACACTTAACCAGAAATTT  
CACCATTTCATGGCCTATGGCCTAGCAATCACAGCACTCATAATGGTGGAAATTCCTTATGTTCAAATTTGTGATCCAAAT  
TATATCCTTGATCCTCAACAGGAGGTGAGGTTATTGCTGAGCCGTAACCTCCAAAGGAATCTCAGTCACTCTTGCCCCG  
ATGTAAAGCGGACTGCAAACGATTCGAAGTTTTGGACCGACGAATACAGGAAGCACGGCACCTGCGCAAACCGTATATT  
CCGTACACCAGGGGATTACTTTAGAAAAGCAGATGACTTGTATCGCAGTCATCCATACACGTTTTTTTTAATCTATTTC  
GCCAACCACATCCGCCAGGACAGCAAGTCCCCGTGAGCACATTTATTAATCTCGTACCAACGGCAACAGCAAGGAAGA  
ATGCACGACTGTGGTGAATTTGGAATGGAACCCCTCTACCTACTGAAGGAAGTAGTTATTTGTTACAATAAGACCTCGTT  
CGGTTACGAAATGAATTTCTTAGAAAAGTTGATCCTTTGTATTTCTATCGGGAAGGGAAATTAAGATTCTATTAATG  
TGTTTGATAACACTAAGAAATGGAATCAATAAT

>Rchinensis2\_30

AACGATGTGGCTTTTGTCTGCTCACTGCTCTAGGTTTGGTCTTTCAGTCTGACGTCATCATATACACCCTACCAATACCTGT  
TGTTTGTCAACGGTGGCCAATGTCTGTTTGTATGATATCAACTGCCCTAACACTTCCCCTCCAATCATCACGGTACA  
CGGTTTATGGCCATCGAACTATAATCGACCTCGCTTGAAGTGCTCTGGCGTTGTGACATCTAGTGAACACTGGTAACA  
CATATTATTATGCGATTATATATGAGTACCAAACAGTACTAAAAGCAAACCTGGATCAACATTCTTGGTCCGATGTGG  
AGAAGGGAAACCATATAGGTTTCTGGAAGCATGAGTGGCAGGCTCATGGACAGTGTTTAGACACCGTCTTTCCAGTTTC  
CACATACCAAATATTTCCAATGGTGTGCGGATATGTGGAAGAAAACGTTGATAGGCGAGATCCT

>Rchinensis2\_31

ATGGCATTCCTAGCAGTTAGGACACTAATTGTTCTTATGCTTATTTCTACATTTGCTAAAGCCGCAAACAAATATGACT  
ATCTACAACCTAGTGAACAATGGCCTAAAACGTTCTGCCATAATAACCGAGCTTGCATTCAAGGTGCAGTCTCCCGGA  
GCTGTTCTCGATACATGGTATGTGGCCATCTAATTTCTCCGGCCAGAACGACGCTTGTATGCGTCGACACAATCATCTC  
GAAACTCAATTGCTGTCTCCTCATGGCCAAGCTACACTGGTCTGTCCAACCTGCACTTTTGGGAGTATGAGTATAACA  
AGCACGGCACTTGTTCAGAGAATAACCTCAAACAGACGGACTATTTACCAGAGCCGACGCTTTGTGGAGGCGCTACAA

TGTTACCAATATGCTTTTAAACATCGCGCCACCAAATCTCGCCGGGATCCTCCTATCGTTACGCTGACATTTTGTATGCC  
ATTTCGACAAGGAATTGGGGGATACACTCCTTTGATTCTTTGCAAGCAAGATCCGGCAAATAATATTTGGATTCTGCACG  
AGGTGATAATTTGTTTCAATCCCTTGGGGAATAACGTCATCGCTTGTTCGAGAAGATCGAGATATAGTTGCAACAGCGG  
GTTGATAGACTATCCTAAG

>Rchinensis2\_32\_2

ATGAGATACAGCACTAGTTTGGATTTTGGATCAAACCTATTGGTAATTCGAATACCTGTCAGTTCTTTGCGCTTCGCAGGACT  
TTGATTTCTTCTACTTCGTTCAACAGTGGCCTGGAGCATATTGCGACAAAAGCATAGTTGTTGCTATCCAAAGTCAGG  
GAAGCCTGCAGCAGATTTTCGGCATTACGGTCTCTGGCCAAACTACAAGGATGGCTCTTACCCTTCAAACCTGTGATCCA  
GACAGTGTCTTCGACAAATCTGAGATCTCAGAGTTGATGGGCAGTCTGGAAAAGAGTTGGCCATCTATGAGCTGCCCAA  
GCAGTAATGGTTACAGGTTCTGGTCACACGAATGGGAGAAGCATGGCACTTGTCTCCGAATCTGAACTTGTATCAGAAA  
TTACTTCCAAGCCGGTCTCAAGCTCAAGGAAAAGCAAACCTTCTTCAAGCCCTTAAAAAAGCTGGTAATTTAGTTCGT  
CTATACTCAATTGTTTATAAGAAATTAACCAAGCTAGAT

>Rchinensis3\_3\_Rchinensis4\_1

ATGTTATTGAATCTAATCAGCTGCTCTTATATAAGTTTTGACATTCCTTCTGTTATTTTTTTGTTTTTTTTTTTTT  
CCAACACAATAATGTCTCTAGGTTTCATATGATCATTTTTAAATTTGTACAACAATGGCCACCGCCGTCTGTGATACGTC  
TGGCTGCAAGAGATCGGGGTTATCAGCTTCACGATCCATGGCCTTTGGCCAAATAATAAACGTTATGTGAAAAATCAA  
CCGACTTGTCTTACCAATCGGGCCAACCTCAATTAAGGCTACGATACTCACTAGTTTCGAATTTGGTAAGCAAGCTGAGCA  
CCTCTTGGCCCGATGTGAAAAATGCAAATGATAATGATTTTTTGGAAACAACAATGGGACAAGCATGGCACATGTTCCCTT  
GCAGACATACGACCAAGCACAATACTTCGAGCGGTTCATACACATGTGGAAAAGAAACCAACCTGACAAAAACCTTGGAT  
AGCCTCATCAAACAGACACCGAGACAACAGAACGTCACAGATATAGAACAACCTCATTCGAAGGAGTAACTGCAACTGAAA  
AGAAAACCCCTCCTCCGTTGTGAAACAATCTCATAGTAATGCCAGTAAGTCTCTCTTGAAGAGATTGTCAATTTGCTATGC  
ACACAACGGGATTACTGTGATCGATTGCGTCAGTCGACCAAAATCCACCTTCGAATGCTATGACGGATTTTGGTTTCCT

>Rchinensis3\_6\_Rchinensis4\_44\_2\_SRNase30

ATGGAAACGGCATTGCTATGTACAGTCTCCATGCTGGTTATTTCTGCTTTTCCATCCGGTGCTAAAGCCGCGAATCAGT  
ACGACTATCTTCAATTTGTTCAACAATGGCCGATAACCTTGTGCTACAACAACCCAGCCTGTATTCCAGGAGCATCACT  
CCCCTGGACTTCTTTATCCATGGGTTATGGCCAAGCAATTTCTCTGGCCAGAATCAGCCCTGTGTTGGTACTCCGTTT  
GACTATAATGAGATGCTTAGTCAATATCGTCTCCGAACCAAAATGCTACCATTCTCATGGCCAAGCTTCACTCGTAGAT  
CCAACATGGGCTTCTGGAAATATGAGTATAATCAACACGGCACTTGTTCGGAGAATAACCTCGCGCAGACGGACTATTT  
TTACAAAGCCTATGCTCTCTGGATGCGCTACAATGCAAACCTTTATATTATATGCATCTACAGTTATACCAGGCCACAAG  
ATTGTGCCGGGATACCTCTACCATACGCTGACCTTCTAACTCCGTTCAACAAGCAATTTGGTGGATTCACTCCTTCGC  
TTATGTGCAAGCACGAGCCTGCAAATAATACTTGGATTCTGCACGAAGTCATCATATGTTTTGATGCCATGGGGAACAA  
CGTCATCAATTGTGTTAGAGGATCTAGTTGCTCTGCCACTACCACCGGTATATACACTATCCTTTGCAA

>Rchinensis3\_9\_Rchinensis4\_28\_SRNase26

ATGGGGATTAATGTATCCTGATTTCTCTGCCTTATCAGCAACGTTGCTAGTGCAGCCAACACATACGATTATCTTC  
AACTAGTACTGCAATGGCCAAACACGTTCTGCATCAGTAACCAAAAGTGCATATCAAATCTCCCCTAGACTTCACCAT  
ACATGGGTTATGGCCTAGCAATTTCTCCGGCCAAAATAACCCATGTGTGGGTGCGCCATTTAATAGAGCTCAGATGTCC  
GCGAACTACCGTCTTCAAACCATATTGCTCCCATCCTCGTGGAGAAGCTACCTTATCGTGTCTCCAACACAAACTTCT  
GGCAGACTGAGTATAACAACATGGTACATGTTCCGAGCTCAATTTGCCACAGACGGAACTTCAACAAAACCCATTG  
GCTATGGATGGTCAACAACATTTATAGTATATTTTTCGCTCTCCGTAACAGACAAGGATATCCAATCTTGCCGGGTTT  
ACCTATGACTACGCCGATCTTCTTGCCGAGTTCAACTAGGAATCGGTGGCGTCACTCCCGTGTACTTGCATGGTCA  
TAAATAACAACCAATACGTTCTTACGAAGTGGTTATTTGTTATGATGCCTTGGGGATCAACCGCATCCATTGTGTGCC  
ACAATCGAGTTGCTCTTTTCGCTCCTAACGGACGTGTGCTCTATCCT

>Rchinensis3\_10\_Rchinensis4\_44\_SRNase36

ATGGCACAAAATAATATGGCTTACGTCCTCATGACCTGCACTACTGTTGCCTTACTCTTTACTCTGGCCTCCTCGTATA  
CCGCCTACGAATACTTCTTGTGTTGTTCAACAGTGGTCCAAGACCGTTTGTGGTAACAGCTGCAAAGCTCCCTCTCCAGT  
TTTTACGATACATGGGTTGTGGCCCTCCAACCACTGGCCCTCAGCTGAAGTGCAGTGGTGCAGCATATAATCCACA  
GAGATGAACAACCAACCCATCTTGA AAAAAGAACCTTGA AACTAAATCATGGCCAGATGTTATTCATGGGCAGCATGAGA  
TTTTCTGGATACACGAATGGGCTTCCACGGCAAATGTTTCAGATCTCGTCTTCCCACAGACGAAGTATTTTGGCGCAG  
CCATGAAATGTGGACCGATATGGTTCATAGGAGATATGCTTAAGAAGGCGTCCATCGTCCCGCGGGCCGGAGCAAAGTAT  
AGCCTTCCCGACATTGAAAAGGCCATCAAAGCCAAGACTTCGCACGACCCATTAATCCGCTGCTTCAAGAATCAGTTGA  
AGGAAGTAGCATTATGTTACGATTACTATGGCAAAAACGTGGTTGACTGTGATAAATCGCAAAGCAATTGCCCTCAAGC  
TCCAACCTTATAGAATATCCGAAC

>Rchinensis3\_16

ATGTGTTGGCCAGGATCCTACGGTGGCCCTCAGCACAAATATTTGCTATCCAACCTACAGGAAAACCTGCACAAAGTTTCA  
TTATCGGGGGCTTTTCGGCCAGGTTTAAACAATGGTTCAATCCCAACCTACTGCGATCCCAACAACCCCTTCAATGAAAC  
AAAGGTATACAGTGTGAGGATAATCGACGATTTGCAAAAATATTTGGCCATCGGCTGGCCTGCCCGAGCAGCAACGGTA  
CGCAGCTTTGGCCGAAGAATGGGAAAACATGCATGGCACTTGTCTGCAGTCTGTCTTGGATCGGTATAATTACTTCT

TTCATGCTACCGGCTCAGAGATACATTGAAAGACATCCACGGATACCTTCAAGATTATGGAATCCGACCAGATGGGAC  
AGCGTACAACCTAAACACCCAAATATTATCTGAGAAAATCATTTCTTGGCCTCAA

>Rchinensis4\_8

GCATTTAACATTCTTTTTCTCTCAATAATATCTACAGCGAGCTACCAATATTTTCAGTTTGTGCAGCAATGGCCACCAA  
ACTTCTGCTACGGTAGATATCGTCTTGCAATAGGCAATCATTCACCATTTCATGGCCTGTGGCCAAATAATTTTTCACA  
AGTTAATTACAATCATATTTGTTTCAGGGGCCGATTTAAAAATCAGATGTATTTCAATCAAACACTGGTAAACGACCTG  
ACTCGCTCTTGGCCGGACCTGAGAAATGGGAACCATCAAAGTTTTGGGAAGAGCAGTGGGATAAACATGGCAAATGCT  
CGGATCAGACGTATGGGCAAACGCGATACTTCCAGCGCGCCTTCGAGATGTGGAACCAATTTCGATATTACTGATATCTT  
TACTGCCGCTGGCGTCGTATCTCCGCCAGGGACACAACCAAGTAAAGTTAACGCGAGCGACTTAGAAGCACGCATTCAA  
GCAGTAACTCATATGGCCCCTATCCTTCGGTGCAGAAAAGTTACAGTGCAGAACGTTCAACGGCCAGTTGAGCTAATTT  
ATGAAGTGGGCATTTGTTACGATTATCATGGAACAAATCTGTATCCTTGTACCAGCACACAAGGAAGATGCGGCGTAA  
TGATATATACTTT

>Rchinensis4\_31

ATGAAGAATTCAAACCTTCATTATCCTTCTATCAGTATATGCACCTTGTACAAGTTCTCAACGTTTTCAAATGCTGAACCC  
ACGAGTACATGCAATTTGTACTCCAGTACCCACCTGGAGTTTGTCTATGACCAATCAAAAAGTTCATTGCATCTCACCTCT  
CCCAACCAAGTTTCATGTACATGGAATATGGCCTTCTAACTTCTCCAATACACTTGTCCGTTGTGGGCACGCACTGAGG  
AATAACCCCTTTCATAAGACGGATTTGGGAAACTCATGGCCGTCCGTGTTAACACAAAACAACAATATGCAGTTCTGGG  
AGCATGAGTATAGAGAGCACGGTGCATGTGCAGTAGAGTCAGGTGTACCACCTTTCACTCAAAGTCTACTTTGAGAA  
AGGACACCAACTATGGAACCAATATGACATCCTTGCAGTGTTCGTCAAAGTGGTATTAACCAGGTTACTGCAACATCA  
TACACTATGACTCAGCTTGTAAACCGCAATCCAAAAGAAAAATTGGGAGTAAACAATACCCCTTTAATCATGTGCAGGAGGA  
CAGCCCTTGGTTACACACTAAAGGAAGTGATAATTTGTCTGGATCACCAGGCAACAAATGTGATAAGTTGTGCGCTTAA  
TAATATTAGAAAAACAGATTGCCGAGATCCTTCAGGCAAGGTATACTATGTAGCT

>Rchinensis4\_41

ATGAAAACAGCAGCAGTCTGTCTCCTTTTCTTGTCTCTGTTATACTGTTCAAGGGTTCCCATGCAGAGCCATACGAAT  
ACCTACAGTTTGTCTTGCAATACCCTAGAGGTTACTGTGTTAACGACAAGAAATGCATTCACCAGGCGAGCTTGCCAGC  
CAAATTCACGGTTCATGGAATTTGGCCCACGAATATTTCCGAGCCGATTATCAGCTGTGACAAGGCACAGAACTACAC  
TCATATTACTCGGCTTGTTTTGTFTTTCAGATAACTCCGTCGTTGAAAACCGATCTTCTCCAATCTTGGCCCAGCGTCG  
TGACAAAATAAGATGATATGTCGTTTGGGAACACGAATATAATAAGCATGGGTCTGTACTGCACCAGCTATCACTCA  
GACAGCGTATTTTGGAGAGCTCACAAGTCTGGAAGGAGTATGATCTCTATTCCATTTTGGAAACAAAAAATATCAAG  
CCGGGGCAATCTCGATCGTATTCCTGGCTGATTTTGAAGCAGCCGTCAAGTCCAAGATGGGTACCGACACAAAACCTC  
TCATCCTTTGTAAGCAGGACAAAATAACTCGTGGGAGCACACAACCAACTTCATTTTGGAGGAAATTTGTGATCTGTTT  
CGATCACCAGGGGACAAATCTGGTCAATTGTACCCGATCAACAGATTGTGACCAGAAGCAGAAGATATACTACCCCT

>MDP0000267606AT2Lineage

ATGATCTCTCTGCTCAATTCGCCTCTGCAGTAGCACTGATTGCGGTGGGCGCTTCTCTGTGCCTGATCGATGCCAAGC  
AAGCCGGAATCGGATTCGAAATCGGAAGCAGAGGAGGAGGGCAGAGGGAGTTTCGATTACTTCAACTTGGCCCTGCA  
ATGGCCTGGCACTTCTGTTCAGCGCACCCGCCATTGTTGCTCCTCCAATGCTTGTGCCGCGCTCAAATGCTCCAACC  
ATGTTTACAATCCATGGATTGTGGCCTGACTACAATGATGGAACCTGGCCTGCCTGTTGCACACGGAAAACCTTTGATG  
ATAAGGAGATCTCAACATTGCACGATGCTTTAGAGAAATACTGGCCATCTTTAAGCTGTGGTAAACCATCATCTGCCA  
TGGTGGAAAAGGATCATTTTGGGGTTCATGAGAAGCACACTTGCTCCTCTCCAGTAGTTGGAGATGAATACAATTACTTT  
TTGACAAAATGCTTATTTAAGTACAATGTCACTCAAATCCTGAATGAAGCAGGATATGTACCATCCAATACTGAAAAAT  
ATCCTCTTGGAGGCATTGTTTCTGCTATTTCAGAATGCTTTCGGGCAACCCCGAGGTTGGTTTGCAAAAAAGGGCCTT  
GGAGGAACCTCATCTATGCTTCTACAAGGATTTCCAGCCTCGGGATTGTCTGGTTGGATCTGGCAGTCTAAGTGACAAG  
TTAGCTTCAAGTAGCTCATGTCCAGTTTGTCTCAGCATAACCAGCATATGCATCATTGGATTCTTGCAGCTCAACTCTTA  
ACCTGCAGAATGTCAATCTGCCC

>M\_domestica\_MDP0000160706\_Malus\_S\_RNase\_lineage\_2

ATGGAGTCGAAGTTAGTGCAAGTCATATTTTTCTTCTTGTGTTGTCACAGTTTCATCCGCTTACACACCATTCCAATACT  
TTATGCATGTTTCAGTTCTGGCCAGCTGCTGAATGCCAAGCTACAGGGGGGAATAAATGCCACATCATGCAACCATCTCA  
TCTTCAGTTCACTATTTCATGGTCTCTGGCCTGCGAATAAATCATCCTCTTCATCCCTTGGCTGCAAGGGGGATGCCTAT  
AATGTGAATGGGATGAATGATACACTGAAAAGGAGCTACTCAGTTTCGTGGTGGGATTGGAGAAAAGGGGAGCATGTCTG  
AATTCTGGCAACGAGAGTATGATAAGCACGGAAAGTGTCTCCGACAATGTGTTTCTGAAGACCGAGTACTTCCGGAAGAC  
CCTAGCGATGTACCATGATTTTGTATATAGCTCAAATCCTCGAGAAGGCTAATATTGTACCCCAACTACTTTCAGCCCAAG  
ACGTCGTTGTACAAAATTGTACTCCATCGATCAGATAACAAAGGCCATTGAGTCCAAAACCGGCGGACATTCCGTCATA  
TCAGATGCTATCAACAAAACAGAGAAGAGCAACAATGGAAGTAAACCATTAATATATTTGGCCCAAGTCGCCCTCTG  
CTATAATAGATCTGGCAATAGCAGAATAACTGTGATCCAGGCGAAACAACCAGCTGCAACTTTAATGAATCAGAACC  
AAAACGTACCAAGAATAGCCACATAAAGCTCTGG

>M\_domestica\_MDP0000250548A\_S\_RNase\_lineage\_1

ATGCACTTCTTCAAGATTGCTCTCCTTGTCTCCTCCTTACTTTCATCACCTCTCTCGGAAAGATCAATGCTGCCACAC  
CATATGACATCTTCCAGTTCGTCCAGCAATCCCATTGGCCTTCTGCTACGGAACCGATATCTGCGGAGACCAACCAGT

ACTGCCCCGTACCTTTACGACGCACGGCCTCTGGCCAAGCAGCAGCACCAATCCAGCTGCTCCTTTAACCTGCGCTGGT  
ACCGCATTACGCCGTAGTGAGATGAATGATCCCGACAATCAATATCTGCAACTACTTTTGTCTTATTCTGGCCAACT  
TCAACATTAGACAAACAAATATGGATTTCTGGGAGTATGAGTACAACAAGCACGGCAGGTGCTCGGACAATACATTTTC  
CCAGACACAATACTTCCGTGAAGCTTATAGATTGTGGTCTACCTACAATGCACTCCATCTATTTTCTCAAACAACCTTGG  
ATTGTACCAGGCTATCCATATCGTTATATCGACCTTGAATTGGCCATTGCAAGGACTATAGGAGGGAAAGCACCTCTTC  
TTATGTGCAAGTATAACGGGGTGAGCCCGTATCTGGTGGAAGTCGTCATCTGCTTTGACTACACTGCAGCGAATCCGGT  
CGATTGTGTCAGGACAACAAATTTGTGGAAATCCTAATGCATTGGGCAAAATTTTCATCTAATATATGGTGGAAATAGGCAG  
>M\_domestica\_S2\_RNase\_MDP0000345854

ATGGGGACTACGCGGATGGTATATATAGTTACGATGTTATTTTCATTAATTGTATTAATATTGTCTTCGTCTACGGTGG  
GATACGATTATTTTCAATTTACGCAGCAATATCAGCCGGCTGCCTGCAACTCTAATCCTACTCCTTGTAAGATCCTCC  
TGACAAGTTGTTTACGGTTCACGGTTTGTGGCCTTCAAACATGAATCGAAGTGAATTATTTAATTGCAGTAGTTCAAAC  
GTGACTTATGCGAAGATACAAAATATCCGAACCCAGTTGGAAATGATTTGGCCAAACGTATTC AATCGAAAAATCATT  
TAGGCTTCTGGAATAGAGAGTGGAAACAAACACGGCGCCTGTGGGTATCCACAATACGGAACGACTTGCAATTACTTTCA  
AACAGTAATCAAATGTACATAACCCAGAAACAAAACGTCTCTGATATCCTCTCAAAGGCCAAGATTGAACCGGATGGA  
AATATCAGGACACAGAAGGAAATTTGTAGATGCCATAAGAAAAGGTATCCATGGTAAGGAACCAAACTCAAGTGCCAAA  
AGAATACTCAGATGACTGAATTGGTTGAGGTCACTCTTTGCAGCGATGGCAACTTAAAGCAGTTTCATAGATTGCCCCCA  
CCATTTTCAAATGGATCACGACATAACTGCCCCACCAATCATATTCTG

>M\_domestica\_S3\_RNase\_MDP0000266136

ATGGGGATTACAGGGATGATATATATGGTTACAATGGTATTTTCATTAATTGTATTAATATTGTCTTCGTCCGCGGTGA  
AATTCGATTATTTTCAATTTACGCAGCAATATCAGCCGGCTGTCTGCAGCTCTAATCCTACTCCTTGTAAGGATCCTCC  
TGACAAGTTGTTTACGGTTCATGGTTTGTGGCCTTCAAATGTTAATGGAAGTGACCCCAAGAAATGCAAACTACAATC  
TTGAACCTCAAACGATAACAAAATCTTACAGCCCAGCTGGAAATTTATTTGGCCAAACGTACTCAATCGAAAGGCTCATG  
CACGCTTCTGGCGTAAACAGTGGCGTAAACATGGCACCTGTGGGTACCCACAATAGCGGACGACATGCATTACTTTAG  
CACAGTAATCGAAATGTACATAACCAAGAAACAAAATGTCTCTGAAATCCTCTCAAAGGCGAAAATTAACCGGAGAAG  
AAATTCAGGACACGGGACGACATTTGTGAATGCCATAAGCCAAAGTATCGACTATAAGAAACCAAACTCAAGTGCAAGA  
ACAATAATCAGATAACTGAATTGGTTGAGGTGGTCTTTGCAGCGATAACAACTTAAACGCAGTTTCATAGATTGCCCCCG  
CCCATTTCCACAAGGATCACCATTTTCTGCCCCACCAATAATATTAGTAT

>P\_persica\_ppa024151m\_S\_RNase\_lineage\_1

ATGTTGTTTCTGTTTCTTGCTTTCTTTTATGTCAACAACATTCATGTGACTGCAATGCTCCTGGACAGTATGACTACT  
TCCAGTTTGTTCAGGAGTCTCCTTTTCTATTTTGCAAAAATATTAATGGAAAGGGATGCAACATCCTACTCCTGCCACG  
GATATTTACTATTTCATGGCTTGTGGCCAAGCAACTTCACACATCGTCATAAACCTTGCGTTGGTGCACAATTTAGTAGA  
GATATAAATGAAGCCTCCAATGATGAATTGCGAGCTGATCTGGAGTTGTTCATGGCGAAGCTTCATCAGTGGGCGGTCAA  
ATATGGACTTCTGGGAATATGAATACAACAACACGGCAAGTGTCCGACGACAAGTTTTCGCAGACGCAATACTTCGA  
CCGTGCCAGGAGTTTGTGGAAGCAATACAACCTCATGCTCTATTTTCTAATCGCTCGCTTGAACCAGGCAAGTCATAT  
AGTTTACTGGCCTTGAACAAGCCATCCGATCATTATAGGCGGGAGCAGACCTCTCTCCTTTGCGAGCAATCTAAGA  
GGAAGAAGAACAAGAAGAAGACAAAA

>P\_persica\_S2\_RNase\_ppa018459m

ATGGGGATGTTGAAATCGTCACTCGCTTTCCTTGTCTTGTGTTTTGCTTTCTTCTTTTGTACGTTATGAGCAGCGGAT  
CTTATGACTATTTTCAATTTGTGCAACAATGGCCACCGACTAACGTCAGAGTTCGCGTCAAGCGACCTTGCTCCAATCC  
CCGGCCATTACAATATTTACCATCCATGGCCTATGGCCAAGCAATTTATCAAACCCAAAGATGCCAGTAATTCACACA  
GGGTGCAATTTAAGAAACAGAATTTGTACCCTTATATGCAATCCAACTGAAGATATCTTGGCCGGACGTGGAAAGTG  
GGAATGATACAAAATTTGGGAAGGCGAATGGAATAAACAATGGTACATGTTCCGAACGAACACTTAACCTAATGCAATA  
CTTCCAGCGATCCCACGCAATGTGGAAATCACACAATATTACAGAGATCCTTAAAAACGCTTCAATCGTACCACATCCG  
ACAAAAACATGGAAGTACTCGGACATAGAATCACCCATTTAAAAGAGCAACTAAAAGAACACCCGTCCTTTCGTTGCAAC  
GTGATCCAGTACAGGCGAATACTCAGTTGTTTACATGAAGTGGTATTTTGTATGAATATGATGCGCTAAAGCTGATTGA  
CTGTAATCGAACAGATTGCTGGAATAACGTTGACATTAAGTTTCAA

>P\_persica\_ppa011133m\_Prunus\_PA1

ATGCCATTAAGATATGAGATATTGGCAGGGCTTCTCTGCAAGCTATTACCACTCATGGGCAACCGTATGACTACCTAC  
AATATGACTACAATGGCAGAAGACGAAATGCTTGAAGGTGCGGAAACGGTGCCTCATATGAGAAGTTCACTACTCA  
CGCCTCTGGCCAACCAACCTCTCCAAGATATTGACATGCAATCAGCTTCAAATTTAGCAGCACTATGCTGCAAAAT  
AATGCTTCATTGCTATCGAAGATGAAAAAGTCTGGCCAAATCTGGAGCAGAGAGTTGCCAAGGAAAAGACAACGATA  
TGTGGTTTTGGGCGATGGAGTACGAAAAACACGGTATATGTGCCAAGTTTTCTAGCCAGAATACTTACTTGTCAAAGC  
ATGTGATTTTGTGGGAAGAAAACAAGATTAAGGAGATTTTGTAGCACCACAAAATCTTTCCAACAACCGGACGTCATAT  
AAAGATGTTTTGCTTATGAATGCTATTGAAATGGAACCTCGAGTTCTCCTCTCCTTCTTTGCCATAGAGTCAACGGCG  
ATTATTTGTTGTGGGAGGTTGTTCTTTGCTATGACGACACGGCTAAAAACGGATGAATTGTTCTGATCAAAGTGCAAG  
ACAAACAAATTTGCGGAACGGACATCTATTATAAA

>P\_mume\_S\_RNase\_scaffold241\_33

ATGGGGATGCTGAAATCGTCACTCGCTTTCCTTGTTCTTGCTTTTGCTTTCTTCTCCTATTCATCACAATAATTTTGG  
CAGGATCTTACGACTATTTTCAATTTGTGCAACAATGGCCACCGACCAACTGCAGAGTTCGCATCAAGCGACCTTGCTC  
CAACCCCGGCCATTACAATATTTACCATCCATGGCTTATGGCCAGTAATTATTCAAACCCAACGGTGCCAGTAAT  
TGTAATGGGTCAAATTTGACGCAAGGAAAGTGTACCTCAACTACGAAACAACTGACGAAATCTTGCCGGACGTGG  
AAAGTGGCAATGATACAAAATTTGGGAAGGCGAATGGAACAAACATGGTACGTGTTCCGAGCAGACACTTACCAAAT  
GCAGTATTTGAGATATCCACGACATGTGGCTGTCCACAATATAACACATATCCTTAAAAACGCTACAATCGTACCA  
AGTGCCACACAAACGTGGAAGTACTCGGACATAGTAACACCCATTTAAATAGCAACTAAAAGAACACCCCTCCTTCGTT  
GCAAACCTGATCCAGCACAAAATAAGAGCGGACCGAAGACTCAGTTGTTACATGAAGTGGTACTTTGTTATGGATATAA  
TACAAAAAAGCAGATTGACTGTAATCGAACAGCAGGATGCTGGAATAATGTTGACATCAAGTTTCAA

>P\_mume\_scaffold442\_35\_S\_RNase\_lineage\_1

ATGGTACTTGACCACCAATTGGCTCGGCTTTCAGTCCCCTTACATGCTGCAATGCCGCTGGACAGTATGACTACTTTC  
AGTTTGTTCAGGAGTCTCCTTTTGTATTTTGCAAAATATTACTGGAAAGGGATGCAACATCCTACCTCTGCCACGGAT  
ATTTACCATTTCATGGCTTGTGGCCAAGCAACTTCAAACATCGTCATAAACCTTGCCTTGGTGCACAATTTAGTAGAGAT  
ATGAATGAAGCCTCCAATGATGAATTGCGAGCTGATCTGGAGTTGTCATGGCGAAGCTTTCATCAGTGGGCGGTCAAATA  
TGGACTTCTGGGAATATGAATACAACAAACACGGCAAGTGTCCGACCACATATTTTCGCAGACGCAATACTTCGACCG  
TGCCAGGAGTTTGTGGAAGCAATACAAAGCTCATACTCTATTTTCTAATCGCTCGGTTGAACCAGGCAAGTCATATCGT  
TTTACTGACCTTGAACAAGCCATCCGATCATTATAGGCGGGAGAAGACCTCTTCTCCTTTGCATGCAATCTGAGTGGAA  
AGAAGAAGACAAAACAATATTTGCTGGAAGTGCATAATTTGCTTTGATGACATAGCAATTAATCCAGTGAATTGTCCCAA  
GAGGATGTCAAAGAATGTCTTCCACAATCCCCTGTATGGTATATGCTA

>M\_domestica\_SH\_RNase\_AB032247

ATGGGGACCGGGATGATATATATGGTTATGATGGTATTTTCACTAATTTTATTAATATTGCCTTCGTCCACGGTGGGAT  
TCGATTATTATCAATTTACGCAGCAATATCAGCCGGCTGTCTGCAACTCTAATCCAACCTCCTTGTAAGGATCCTACTGA  
CAAGTTGTTTACTGTTACGGTGTGTGGCCTTCAAACCTCGAATGGAATGACCCAAAAATATTGCAACGCACAGCAATAT  
CAGACGATGAAAATACTCGAACCCCAAGTGGTAATTTTGGCCGAACGTACTCAATCGAAACGATCATGAAGGCTTCT  
GGCGTAAACAGTGGGAGAAACATGGCTCCTGTGCGTCTTCCCAATACAGAACCAGAAGCATTACTTTGATACAGTAAT  
CAAAATGTACACAACCCAGAAAACAAACATCTCTGAAATCCTCTCAAAGGCGAATATAAAACCGGGTAGGAAAAACAGG  
ACACTGGTGGATATTGAAAATGCCATACGTAATGTTATCAACAATATGACACCACAATTCAGTGCCAAAAGAATACTA  
GGACATCATTGACTGAATTGGTTGAGGTCGGTCTTTGCAGCGATAGCAACTTAACGCAGTTCATAAATTGCCCCCGCC  
ATTTCCACGAGGATCACGGTATTTCTGCCCCACCAATATTCAGTAT

>P\_pyrifolia\_S9\_RNase\_AB104909

ATGGGGATTACAGGGATGATATATATGGTTACAATGGTATTTTCATTAATTGTATTAATATCGTCTTCGCCCCGTGATGA  
AATTCGATTATTTTCAATTTACGCAGCAATATCAGCCGGCTGTCTGCAGCTCTAATCCTACTCCTTGTAAGGATCCTCC  
TGACAAGTTGTTTACGGTTCATGGTTTGTGGCCCTCAAATGTTAATGGAAGTGACCCCAAGAAATGCAAACTACAATT  
TTGAACCTCAAACGATAACAAAATCTTACAACCCAGCTGGAACTATTTGGCCAAACGTACTCAATCGAAGGGCAAATG  
TGCGCTTCTGGCGTAAACAGTGGCGTAAACATGGCACCTGTGGGTACCCACAATAGCGGACGACATGCATTACTTTAG  
CACAGTAATCGAAATGTACATAACCAAGAAACAAAACGTCTCTGAAATCCTCTCAAAGGCGAAAATTAACCCGGAGAAG  
AAATTCAGGAAACGGGACGACATGTAAATGCCATAAGCCAAAGTATCGACTACAAGAAACCAAACTCAAGTGCAAGA  
ACAATAATCAGATAACTGAATTGGTGGAGGTCGGTCTTTGCAGCGATAACAACCTAACGCAGTTCATAGATTGCCCCCG  
CCCATTTCCACAAGGATCACCATTTTCTGCCCCACCAATAATATTCAGTAT

>P\_pyrifolia\_S4\_RNase\_AB009385

ATGGGAATTACGGGGATGACATATATGTTTACAATGGTATTTGTCATTAATTGTATTAATATTCTCTGCGTCCACGGTGG  
GATTCGATTATTTTCAATTTACGCAGCAATATCAGCCGGCCGTATGCAACTCTAATCCTACTCCTTGTAACGATCCTAC  
TGACAAGTTGTTTACGGTTCACGGTGTGTGGCCTTCAAACAGGAATGGACCTGACCCAGAAAAATGCAAGACTACAACC  
ATGAATTCTCAGAAGATAGGAAATATGACAGCCCAGTTGGAAATTTTGGCCGAACGTTCTCAATCGAAGCGATCATG  
TAGGCTTCTGGGAAAGAGAGTGGCTCAAACATGGCACCTGTGGGTATCCACAATAAAGGACGACATGCATTATTTAAA  
AACAGTAATCAAATGTACATAACCCAGAAACAAAACGTCTCTGCAATCCTCTCAAAGGCGACGATTCAACCGAACGGG  
AATAACAGGTCACCTGGTGGATATTGAAAATGCCATACGCAGTGGTAACAACAATACGAAACCAAAATTCAGTGCCAAA  
AGAATACTAGGACGACGATGAATTGGTTGAGGTCACCTTTGCAGTAATAGAGACTTGACTAAGTTCATAAATTGCC  
CCACGGCCTCCAAAAGGATCACGATATTTCTGCCCCACCAATGTTAAGTAT

>P\_ussuriensis\_S35\_RNaseDQ839240

ATGGGAAATACGGGGATGATATATATGTTTACAATGGTATTTTTCATTAATAGTATTAATATTGTCTTCGTCAACGGTGG  
GATACGATTATTTTCAATTTACGCAGCAATATCAGCCGGCCGTATGCAACTCTAATCCTACTCCTTGTAACGATCGTCC  
TGAAAAATTTGTTTACGGTTCACGGTGTGTGGCCTTCAAACAAGAAGGGACCTGACCCAGAAAAATGCAAGAATATACAA  
ATGAATTCTCAGAAGATAGGAAATATGGCAGCCCAGTTGGAAATTTTGGCCGAATGTGCTCAATCGAACCGATCATG  
TAGGCTTCTGGGAAAGAGAGTGGCTCAAACATGGCACCTGCGGGTATCCACAATAAAGGACGACATGCATTACTTAAA  
AACAGTAATCAAATGTACATAACCCAGAAACAAAACGTCTCTGCAATCCTCTCGAAGGCGATGATTCAACCGAACGGG  
CAAAACAGGTCATTGGTGGATATTGAAAATGCCATACGCAGTGGTACCAACAATACGAAACCAAAATTCAGTGCCAAA



AGAATACTAGGACGACGACTGAATTAGTTGAGGTCCTCTTGCAGTGATAGAGACTTAACGAAGTTCATAAAATTGCC  
CCAACCACAACAAGGATCACGATATCTCTGCCCGCCGATGTTTCAGTAT

>P\_avium\_S3\_RNase\_AJ298312

ATGGCTATGTTGAAATCGTCACTCTCTTTCCTTGTCTTGGTTTTGCTTTCTTCTTGTGTTTCATTATCAGCGCTGGT  
ATGGATCTTATGTCTATTTTCAATTTGTGCAACAATGGCCACCGACCACCTGCAGAGTTCAGAAGAAATGCTCTAAACC  
CCGGCCATTACAAAACCTTACCATTTCATGGCCTATGGCCAAGTAATTATTCAAACCCAAACGATGCCAGTAATTGCAAT  
GGGTCGCGATTTAAGAAAGAGCTATTGTCCCCTCGAATGCAATCCAACTGAAGATATCTTGGCCGAACGTTGTAAGTA  
GCAACGATACAAAATTTTGGGAAAGTGAATGGAACAAACATGGTACTTGTTCGGAACAGACACTTAACCAAGTGCAATA  
CTTCGAGATATCCCACGAAATGTGGAACCTGTTCAATATTACAGATATCCTTAAAAACGCTTCAATCGTACCACATCCG  
ACACAAACATGGAAGTACTCGGACATAGTATCAGCCATTTCAGAGTAAACTCAAAGAACACCCCTCCTTCGTTGCAAAA  
CGGATCCAGCACATCCTAACGCGAATACTCAGTTGTTACATGAAGTGGTATTTTGTATGGATATAATGCAATAAAGCA  
GATTGATTGTAATCGAACAGCAGGATGCAAAAATCAAGTTAACATCTTGTTTCCA

>P\_dulcis\_SM\_RNase\_DQ099895

ATGGGGATGTTGAAATCGTCACTCGCTTTCCTTGTCTTGGTTTTGCTTTCTTCTTTTGTACGTTATGAGCAGCGGAT  
CTTATGACTATTTTCAATTTGTGCAACAATGGCCACCGACTAACTGCAGAGTTCGCGTCAAGCGACCTTGCTCCAATCC  
CCGGCCATTACAATATTTTACCACCCATGGCCTATGGCCAAGCAATTATTCAAACCCAAAGATGCCAGTAATTGCACA  
GGGTCGCAATTTAAGAAACAGAAATTTGTACCCTTATATGCAATCCAACTGAAGATATCTTGGCCGGACGTGGAAAAGTG  
GGAATGATACAAAATTTTGGGAAGGCGAATGGAATAAACATGGTACATGTTCCGAACGAACACTTAACCTAATGCAATA  
CTTCCAGCGATCCCACGCAATGTGGAAATCACACAATATTACAGAGATCCTTAAAAACGCTTCAATCGTACCACATCCG  
ACAAAAACATGGAAGTACTCGGACATAGAATCACCCATTAAAAGAGCAACTAAAAGAACACCCCTCCTTCGTTGCAAAC  
GGGATCCATCACATCCTAACAACTCTCAGTTGTTACATGAAGTGGTATTTTGTATGATTATAAGGCAAAAAAGCAGAT  
TGATTGTAATCGAACAGCAGGATGCTGGAATAATGTTGACATCAAGTTTGAA

>P\_avium\_S1\_RNase\_AB028153

ATGGCGATGTTGAAATCGTCACTCGCTTTCCTTGTCTTGGTTTTGCTTTCTTCTTTTGTACGTTATGAGCAGTGGAT  
CTTATGACTACTTTTCAATTTGTGCAACAATGGCCACCGACCAACTGCAGAGTTCGCATCAAGCGACCTTGCTCCAAACC  
CCGGCCATTACAAAATTTTACCATCCATGGCCTATGGCCAAGTAATTATTCAAATCCAACGAAGCCAGTAATTGCAAC  
GGGTCAAAATATGAGGACAGGAAAGTGTACCCTAAATTTGCGATCCAACTGAAGAGATCTTGGCCCGACGTGGAAAAGTG  
GCAATGATACAAAGATTTTGGGAAGGCGAATGGAACAAACATGGCAGATGTTCCGAACAGACACTTAACCAATGCAATA  
CTTCGAGATATCTCACGACATGTGGGTGTCTACAATATTACAGAGATCCTTAAAAACGCTTCAATCGTACCACATCCG  
ACACAAAAATGGAGCTACTCCGACATAGTATCACCCATTAAAACAGCAACTAAAAGAACACCCCTCCTTCGTTGCAAAA  
CTGATCCAGCAACTAATACTGAGTTGTTACATGAAGTGGTATTTTGTATGAATATCATGCGTTAAAACAGATTGACTG  
TAATCGAACAGCAGGATGCAAAAATCCACAAGCCATCTCGTTTCAA

>P\_avium\_S5\_RNase\_AJ298314

ATGGCGATGTTGAAATCGTCACTCGCTTACTTGTCTTGGTTTTGCTTTCTTCTTTTGTATGTTATGAGCAGTGGAT  
CTTATGACTATTTTCAATTTGTGCAACAATGGCCACCGACCAACTGCAGAGTTCGAACGAAATGCTCCAACCCCCGGCC  
ATTACAATATTTTACCATCCATGGCCTATGGCCAAGTAATTATTCAAACCCAAAGATGCCAGTAATTGCATTGGGTGCG  
CAATTTAACGAAAGTAAAGTGTATCCCCGATTGAGATCCAAATTTGAGGATATCGTGGCCGGACGTGGAAAAGTGGCAATG  
ATACAAAGTTTTTGGGAGACGAATGGAACAAACATGGTACATGTTCCCAACGGATCCTTAACCAATTCCAATACTTTGA  
GCGATCCCAGCAAATGTGGAGATCTTACAATATTACAAATATCCTTAAAAAAGCTCAAATCGTACCAAATGCGACACAA  
ACGTGGAGCTACTCGGACATAGTATCACCCATTAAAGACAGCAACTAACAGAACACCTCTCCTTCGTTGCAAAATCTCAGC  
CTAAGAGCCAAGCGAATTTTCAAGTTGTTACATGAAGTGGTACTTTGTTTTGATTATAATGCGCTAGTACATATTGACTG  
TAATCGAACAGCAGGATGCTGGAATAACGTTGACATTAAGTTTCAA

>P\_dulcis\_S7\_RNase\_AY291118

ATGGGGATGTTGAAATCGTCACTCGCTTTCCTTGTCTTGGTTTTGCTTTCTTCTTTTGTACGTTATGAGCAGTGGAT  
CTTATGACTATTTTCAATTTGTGCAACAATGGCCACCGACCAACTGCAGAGTTCGCATGAAGCGACCTTGCTCCAATCC  
CCGGCCATTACAATATTTTACAATCCATGGCCTATGGCCAAGTAATTTTCAAACCCAAAGATGCCAGTAATTGCAAT  
GGGACTAAATTTGATGCAAGGAAAGTGTATCCTGAAATGCGATCCGATCTGAAGATATCTTGGCCAGACGTGGAAAAGTG  
GCAATGATACAAAATTTTGGGAAGACGAATGGAACAAACACGGTACATGTTCTGAACAGACACTTAATCAATTCAGTA  
CTTTGAGCGATCCCACGAAATGTGGATGTCTGACAAATATTACAGAGATCCTTAAAAACGCTTCAATCGTACCACATCCG  
GCAAAAACATGGACCTATTCGGACATAGTATCACCCATCAAAGCAGCAACTGGAAGAACACCCCTCCTTCGTTGCAAAAT  
ACGATAACAACACTCAGTTGTTACATGAAGTGGTATTTTGTATGGCTATAAAGCAATAAAGCAGATTGACTGTAATCG  
GCCAGGATGCAAAAATAAAATTGACATCAAGTTTCAA

>P\_bretschneideri\_S34\_RNase\_DQ414813

ATGGGGATGACGGGGATGATATATATGGTTACGATGGTATTTTCATTAACTGTATTAGTATTGTGTTCCCTCTACGGTGG  
GATACGATTATTTTCAATTTACGCGCAATATCAGCCGGCTGTCTGCAACTCTAGTACTACTCCTTGTAAGGATCCTGC  
TGACAAGCTGTTTACGGTTACGGTTTGTGGCCCTCAAACCTGGAATGGATCCCACCCAGTAATTTGCACGAATAAAACC  
ATGAATTCCTGACGATGGGAAATCTGACAGCCAGTTGGAAATTTTGGCCGAATGTACTCAATCGAAACGATCATG  
CAGGCTTCTGGAATAGACAGTGGAAACAAACATGGTACCTGTGGAGTCCCCAAAATAAACGACAGCTTGCAATACTTTCG

AACAGTAATCAAATGTACATAACTCAGAAACAAAACGTCTCTGAAATCCTCGCAAAGGCGAATATTAACCCGGAGGGG  
AAAAACAGGACACTGGTGGATATTTCTAAAAGCCATACGCAGTGGTACAACAATAAGGCACCAAAACTCAAGTGCCAAA  
AGAAATCTTCGATGACTGAATTGGTTGAGGTGAGTCTTTGCAGCGATCACAACATAACGCAGTTCATAAATTGCCCCG  
CCCATTTCCACAAGGATCACCACATTTTTGCCCAAACAATAGTATTGAGTAT

>P\_avium\_PA1\_AB096918\_Prunus\_PA1

ATGTTAAAACACTACTCCTTCTTGTGCTCTTTTCAGCGGCGTCTCTGCAAGCTATCACCCTCATGGGCAACCGTATGACT  
ATCTACAATATGTACTACAATGGCCGAACACGAAATGCGTGAAGGCACGGTGCATTCCAGGGATTCAAAAACTGAGTT  
CACTACTCACGGCCTCTGGCCAACCAACCTCTCCAAGATATTGACATGCAATTCAGCTTCAAATTTAGCAGCACTATG  
CTGCAAAATGATGCTACATTGGTATCGAAATTGAAAACCTTCTTGGCCAAATCTGGAGCAGAGAGTTGCCCAAGGAAAAG  
ACAATGATATGTGGTTTTGGGCGATGGAGTACGAAAAACACGGCACATGTGCTAAGTTTTCCAGCCAGAATACTTACTT  
GTCAAAAGCATGTGATTTGTGGGAAGAAAACAAGATTAAGGATATTTTTGCCAAACACAAAATCATTCCAAGAAACGCG  
ACGTATAAAGATGTTTTGCTTACGAATGCTATTCAAATGGAACTCGCAGTTGCCTCTCCTTCTTTGCCATAGAGTCA  
ACGGCGGTGATTTGTTGTGGGAGTTGTACTTTGCTATGACGACACGGCTAAAAAACGGATGAATTGTTCTGATCAAAG  
TGCAAGACAAACAATTTGCCGAACGGACATCTATTATAAA

>F\_vesca\_00230\_S\_RNase\_lineage\_1

ATGGAAATGGCATTGCTAGCGGTTTTTCTTATCTCAGCTGCTGCTTGTTCATCAGTCACTGAAGCAGCCAAGGCCTACG  
ACTACTTCCAGTTCGTACAACAATATCCTATTACCTTATGCATGTTTCGACACAAGTTGCATTCCAGGACAATCACTGCC  
TCGATACTTCTACATCCACGGCTTATGGCCAGTAACTTCACTTATCCGCATGACGATTGTGTGGGTACACTGTTTCGAC  
TACAATCAGATGAGCAGTGATCCTACTCTCTCAAACAATTTGCTGCAATCATGGCCCAGCTTACCGTCCAAATCCCACA  
TCAAATTTCTGGGCGGATGAGTATCACAAGCACGGGACCTGTTCCGAGATAGACTACCCGCAGCACCGCTATTTTTGCCGA  
AGCCCATATGCTCTGGACGTTTCGTCATGCATACCGTATCTTAGCAACATACAACATCGTTCCCGGCAGAACCTACCCT  
GCGGTTGACATTATATACTTTCGTTCCAAGCAGCACTCAAAGGAATCACACCATCTGTTATGTGCAAGGCCAATTTCTGCGG  
GTCAAGAATATCTCCACGAGATCATCATATGTCTTGACAAAACGCTTACCAGATTCATCAATTGTGTTTCGACCATCCAC  
TTGCCGTAATAACAGCGGTAATGTATCCC

>F\_vesca\_00227\_S\_RNase\_lineage\_1

ATGGGGATCCTACTTGTCTGCTGCTTCTCTCTGCGTGTGGTGCAGATGATGCAGCGAACATCTACGACTACATGC  
AGTTCGTCCAGCAATGGCCGGCGACATTTCTGCTATGGTAAATCCGAATTTGTGTCCCAAATCCACCACACAGTACTTTTAC  
GATTCACGGCCTCTGGCCCAGCAATTAATTCGACACCTGAAATTTCCATGCGTTGGCACACCCTTTGATCCCTCGCAGATG  
TTCGCTGCCGAAAACCGTGGTTTTGAGGGACTATTTTTCTGCCGCAAGCATGGCCACAGTTGAATGCTCGTTATAACCACT  
TGGAGTTCTGGAATTCGAGTACGAAAAGCACGGTATGTGCTCGGAGAATCTGAATCAGATGGATTATTTTCAGGAA  
AGCTTACTGGGCGTGGGCTCGATTCAATGCTTATGTTCTGTTTGGCGCATCGCCTAAGCAAATCTACCCTGGCAATTAC  
TATTACACAAGAGATATTGAAGCAGCCATTCAGAGAGTGACCAGTGAGAAGCCTCTGCTTATGTGCAAGAAGGTAAGAG  
TAGGTACGGTTGATAGTTGTCTATTGCAGGAGGTCATCATCTGTCTTGATCGTTGGGCAGACAACGTTGTACCTTGTCCG  
CCTTCGACTGTCATCGTGAACGTTCCCAATTATATATTATGGTTAC

>F\_vesca\_26822

ATGCATGAGTGTGTACGTATCTTAATTTTCATATATGGCAATCTCATTTCATATTTGGCAATCTCATTAAATTGATGAAA  
ACACAATCGACTATACAAAGCCGATCATTTCACAAGGAACACCCTTCCAGTACTACCAACTGGTCATGCGATGGCCAAA  
AGCAGCATGCTACCACAAACCTGCTGAGCCAAAGATTTGTGTTATGGATGATGATCATGTTCCGATGAGGTTACCCCTC  
CACGGAATGTGGGCGACGAACCTGGACAAATATCAAAGATGAAATTCGGTGTGAAAAGGCTGGAACGCCATTTGATGAAG  
ATGAGATGACTAAACAAAAGACACTGCAAGAACAACCTGGAGCAAAGCTGGCCGACGTTACTGGATAATTATCCAACATA  
TATGGAATTTCTGGAAGCACGAATACGATAAGCATGGCCGATGCAGCCAAGATACAACACTCAGACCGAATACTTCGAA  
AAAGCTCACAAATTTGTGGCAGGAATTCAGGTTGTGTACCAAGCACTTGCAGATGACAAGATCATACTGCAGCTGATA  
AGATTCACACCTACAACCAGATCGAGCGAGCAATCGCTAAACGATTCGGCAGTAGTTGGAAGGTTGTGCTTTTTTGCAG  
AAAGGTGAATCTGACGCCTCGTGGTACCGGTGGAACAAAACGATTCTACTTCTTTTGCATGAAATCGTATTCTGCTTT  
GATAACAAAGCAATGGAAAAGAAGAGTTGCAACAGAAAATCGAACTGCGAGAACCGGAAAACCTATAACACTGATAAAT

>F\_vesca\_22609

ATGATGAAGAATTCAGTCTTCGTTTTCTTTCTGTGCTAGTCTATGTCCTTGTCCAACCTTATCAAGCTTTCAAATGCTGAAC  
CATTTGAGTACATGCAGTTTGTGCTCCAGTACCCACTTGGAGTTTGTATGGTACACAAAAGGTGATTCCAAATCACC  
TCTGGCTACCAAGTTTACCCTTACAGCATCTGGCCGTCAAACTTCTCCGATACAGAGTCGTTTGTAGGCAAGCACTG  
ATAAGCTACCCCTTTAATAATGCGCAGATGACGTCGCTCTGCGAGTACTGATTTGACAAAACCTCATGGCCATCTGTGATAA  
CAAAAAAAGCGACATGCAGTTTTGGCAACATGAGTATGAGGAGCATGGCGCTTGTTCAGTAGACAAGGGTGTACCACT  
GTTACCCAGAAGTCTACTCTGAGAGAGGAAACCAGCTCTGGAACCAATATGACATCCATGCAGTCTTGTGATAAAGC  
AATATCAAACCGGATTTCTTCAAAGCCATGCAAAATGACTGAGATTGTAGCTGCAATCCAAAAGAAAATCGGGAAAAACA  
CACTCCTGTACGAAGGTGCAAGGAAGATAACAAAATTTACATAC

>F\_vesca\_12961

ATGTTGTCATTTCTCATTGTTTTGCTTAGTGTCAAATGCTGCTAGCAGCAAATCCACCTCCACCTCCACCTCCAGCTG  
TTCCAGCTCTTGATTCATACAAGCTGGTCATTGAATGGCCAAACACTTTTTGTCTTGTGAGCCACAGCCACCATGCCA  
ACAGCATCCACAGTCTTTTACATTGCATGGCCTTTGGCCACAGGCGGGTGGTTCGATCGTTAGTGAAGTGTCTGTTCA

CCAATGGAAGATCAAACCCTAGAGGCAAATAAAGGTGATCTGACAAAGTTTTGGCCTGATCTTAGGAACTCGGACTTTG  
ATAAGAGTAAAAGCTTTTGGCGTCAGGAGTGGGACACACACGGTCGCTGTTCTGGCAAGCCTCCGGCCGACTACCTTAC  
CATGGTCTTTAATGCAGTAAAAAAGTATGACGTGCAAAAGTTACTTGCAAAGAATGGAATTTTACCAGGTGATCCGACA  
GGGCATACGGCGGCACAGTTTTGAACAGGCAATATTCAAAGAACTAAACTGCACACAGAGATTGAATGCCGGACGAAGG  
ACTCGAAGGAGTATCTATTTCAAATTTATTTCTGCTTAACACCTCAAGGACAGTTCAAGAATTGTCCGATCCGTTACAG  
GTGTGCAAATCAACAAATCTACATGCCCTTGCCTCCGCCAGTCCC

>F\_vesca\_scf0513144\_1\_Prunus\_S\_RNase\_lineage

ATGCATGGTATGTTTCTATATATTGTTGACGTCGGTTTTGCCGAAGGAAAGGTCTATCTATATAACAAGCATGAGATTCCG  
TGACTGTGTTATTGTTGTTGTTTCTTGTCTTAGCACTATAATGTCTCGAGGATCTTATGATCATTTCAAATTTGTACA  
ACAATGGCCACCGCCTTCTGTGCCACGAATCGCTGTAAACCAGGGGCAAACAGATGTTAATGTTCACTATCCATGGT  
CTCTGGCCAGATAATAAAACTTATGTGCCTTGTCTGTCGCCCTTTTACCCTTGTGTTGCAGGCCGTGATCCCTTAATGATG  
CGAGTCTGGTAAACAAGCTGTTGACCTCTCAAATCTGAAAGGAATTGATCGCAAGTTTTGGAAAGAAGAATGGGACAA  
ACACGGAAGATGTTTCTCGCAGACGTACGACCAAAGACAATATTTGAGCGGTCACACAACATGTGGATGGAAAACGGAC  
TTGACCAACACCTTTGGCAACCTTATCAAAGGAAACAGTCTACAACGGAACGTGCGAGATATAGAAAACCTGATTCAAA  
AGGTAACCTGCAACGGAAAAAAACCCTCCTCCGTTGTAAAAACAAAAGATCCACACCTCACGATGAAGTATTAACCTGA  
AATTATAATTTGCTATGCACACAATGGAAGTAGTCTGATCGATTGTGTCCGTTCCATCCACCTGCACGGACGGATTTTAC  
TTTCCT

>F\_vesca\_scf0513063\_1\_Prunus\_PA1\_lineage

ATGGGTTTTGTTTTTTTTTCTGGTGGTTGTGCCGCTTACCTCCAAAGCACTTTCCGGTGGTCATCGCCGTCAACATATCA  
ATGCATACGGCGATGATCCCGGCTATGATCTGGTGTATTTGTCCTACAAGTCACTAATCCTCGTGACAAGGAGAAATGG  
ACCTTACTTAACCATCTTCCGGCTTTGGGCCGAATATCTTCAGAATGGGGCCCCCTGAGACCGGGTACCTTCAACCG  
TACCTAAGAAAGAGGCTCCATGTAATATGGCCAACCAGAAAGACGGAAGCTACCCAACAGACCGGGCCTTTTGGCTGC  
ACGAAGTTGATAAACATGGGACCTGTATGGCAGATATATTCGGACGGGGGAGCAGTACCTACAAAAGGCAAAAAGAATT  
GTATGAGCAGATCGGGATAGGCCAGTTCTTGGGTGTAACGGAAGGTGGCTGCCAAAAATGAATTCATACCGCGGAT  
TTACTGGGGGCGATCGGTACTGAACGCAGACCACTATTAGAAATGTGAAGGAAATCATCTCGTCAGAATTTTATTCTGCT  
ACAGCAAACTGGGTGATTAACCCTGCTTGCCACCCACCCCGATCCAGCAAGAGATTGTCCCGATAGGATTTCTTA  
TGTTCTGCCGCAGCAGCAG

>F\_vesca\_scf0513159\_1\_Prunus\_PA1\_lineage

ATGGAAGCACTTGTGATATTATCATTTGTCCTTCTATCTATTTTTCTCAACTGAGTGCGCAGCTAGGAGAACCCTATT  
ACCAATACATACAACTCTCACTTCAAGTCCCAAGTCGAGGGACCCTCAATCTACTTTGGAGTATTTCCCTTTGCACGG  
CTTTCCGGCCGTAACACATCTCTATCTAACCCTGAATTTGCCCTTGGGTTTTAACCCTGATACACCTATCGAAAAGTAC  
CTGAGAAGTGAAGTCAAGTTATGTTGGATGAGTATAGGAGTACCAGGCCAACGCACGATGACGGATGAGCGATTTTGGC  
TATATGAATACAGTAAACATGGGCAATGTACTATTAACGAATATCCGACCCCTCAAGATTACTTCGCCATGGCAGTTAA  
CCTGTGGCATCTCTATCCTGTGGATAAGTGGTTTAAAGAATAATGGATTGCAGCCAAAAAAGATAAACCCGCTCCAAGAT  
TTTGTGCTGTCATCTCAAAAAGAAATTCGGCGCTATTCCATGGCTAACGTGTTACGACAACGGGAAGAAGCTGAAGGAGG  
TGGGCTTGTTTCTTAAAATCATCCAGTGTGAATGCGAATCCTGCCCTACAAGTTGTCTTATAAGGGCACTAACGTA  
TGATCTAAGATGTAATTATTTGATACAATATGATCTAGGTCCA

>F\_nipponica\_gi561674690\_gi561985884\_gi561957436\_Prunus\_S\_RNase\_lineage

ATGCATGGGATGTTTCTATATATTGTTGACGTCGGTTTTGCCGAAGGAAAGGTCTATCTATATAACAAGCATGAGATTCCG  
TGACTGTGTTATTGTTGTTGTTTCTTGTCTTAGCACTATAATGTCTCGAGGATCTTATGATCATTTCAAATTTGTACA  
ACAATGGCCACCGCCTTCTGTGCCATGAATCGCTGTAGACCAGGGGCAAACAGATGTTGATGTTCACTATCCATGGT  
CTCTGGCCAGATAATAAAACTTATCTGCCTTGTCTGTCGCCCTTTTACCCTTGTGTTAACGGCAGATCCTTGATGCGAGTC  
TGGAACAAGCTGTCGACCTCTTGCCAAATCTGAAAGGAATTGATGCCAATTTTTGGGAAGAAGAATGGGACAAACA  
CGGAAGATGTTTCTCGCAGACGTACGACCAAAGACAATATTTGAGCGGTCACACAACATGTGGATGGAAAACGGACTTG  
ACCAACACCTTTGGCAACCTTATCAAAGGAAACAGTCTACAACGGAACGTGAGAGATATAGAAAACCTGATTCAAAAG  
TAACTGCAACGGAAAAAAACCCTCCTCCGTTGTAAAAAAAGCATCCACGCCTCACGATGAATTTTTAACTGAAAT  
TATAATTTGCTATGCACACAATGGAAGTAGTCTGATCAATTTGTGCCAGTCCATCCAACCTGCACGGACGGATTTTACTTT  
CCT

>F\_nipponica\_gi561805796\_Prunus\_S\_RNase\_lineage

CTCTTTTCCACAGGTTACTACGACTACTTTTCAAGTTGGTGCAACAATGGCCACCCAACGTCTGCTTTAAAAGAAAAGTAC  
CTTGCTACAATAACACGCCATCACTAATCTTTGGTATTTCATGGCCTATGGCCAAGTAATAATACAGTGAATAAAAACCC  
CAGTTGCCACCGAACCCATTTAAACCGCAGGTATATATGATCTTTTGCAGGGTAAGCATGTTAAATAATCAAACGCTG  
CTAGCGGACCTTAGCCGTTCTTGGCCGACGTGGTAAATGGGACGATCCAACGTTTTGGGCCAAGGAGTGGGACAAAC  
ATGGCACATGTTTACAGACCAGACATTTGGGCAAAAACGATACTTCCAGCGATCCACGAGATTTGGGAACAATATAATAT  
TACGGATATCTTTAAAAGAGCTGGCTTGTATATCGATGACGGGGCCAGCAGTACCAAGACGATGCAACGTGCAAAACATA  
CTAACACGCATTGAAGCGGTGACTGGGAAGAAACCTGTCTTTATTGTCAATGGAAATCGATATACCAGCCGACCCGC  
AAGGACAACCACAAAGAGGCTAACCATTCGATTGATTGAGGAAGTGGCCTTTGTTTTGATTATTATGGAACGACATT  
AACTGATTGTACCAATATCAATACACTATGCAAAGGACGTAATGTCTGGTTT

>F\_nipponica\_gi561877040\_S\_RNase\_lineage\_1  
ATGGGGATCATCCAACCTACTGTCTGCTGCTTCTCTCTGCGTGTGGTGCAGCTGATGCGGCGAACCTCTACGATTACA  
TGCAGTTTCGTCCAGCAATGGCCGGCGACATTTTGGCTATGCTAACCCGGATTGTATCCCAAATCCACCGCACAGTACTTT  
TACGATTACGGCCTTTGGCCTAGCAATTACTCGACTTTTGAAGGGAAATGCGTTGGCACACCCTTTGATCCATCGCCG  
GTATTGCATTATTGCATGCATGGAATATTATATCACTTCTATTTCATTTAGTCTTTTCATTTTTCAGAATTCTTTCTGCCG  
TAGCATGGCCTCAGTTGGACGCTCATTATACCGACATGGAGTTCCTGGAAATACGAGTACAACAAGCACGGTACGTGCTC  
GGAGAACTATCTGAATCAGATGGATTATTTCAAGAAAGCTCACTGGGCGTGGGTTTCGTTCAATGCTTATAATCTGTTT  
GCAGCCTCGCCTATGCAAATCTACCCTGGTAATTACTACTATACAAGAGATATTGAAGCAGCCATTGTGAGAGTGACCA  
ATGTGAAGCCTCTGCTTATGTGCAAGAAGGTGAGAGTGGGTAAGGTTGATAGTTGGCTATTGCAGGAGGTCAATCATCTG  
TCTTGATCGTTGGGCAGACAACGTTGTACCTTGTGGCCCTCGATGGTCATCGTGCAACGTTCCAATTATATATTATGGT  
AAC

>F\_nipponica\_gi561793890  
ATGCATGAGTGTGTACGTATCTTAATTTTCATATATGGCAATCTCATTATTGATGAAAACACAATCGACTATACAAAGC  
CGATCATTTTCAAAAGGAACACCCTTCCAGTACTACCAACTGGTCATGCGATGGCCAAAAGCAGCATGCTACCACAAACC  
TGCTGAGCCAAAGATTTGTGTTATGGATGATGATCATGTTCCGATGAGGTTACCCCTCCACGGAATGTGGGCGACGAAC  
TGGACAAAATGTCAAAGATGAAATTCAGTGTGATAAGGCTGGAACGCCATTTGATGAAGATGAGATGACTAAAACAAAAGA  
CACCGCAAGAACAACCTGCAGCAAAGCTGGCCGACGTTACTGGATAATTATCCAACATAATGAAGTTTTGGGAGCACGA  
GTATGATAAACATGGACGATGCAGCCAAGATACAACCCTCAGACCGAATACTTCGAAAAGCTCACAAATTTGTGGCAG  
GAATTGCAGGTTGTGTACCAAGCACTTGCAGATGACAAGATCATACTGCAGCTGATAAGACTCACACCTACAACCAGA  
TCGAGCAAAGCAATCGAAAACGATTCGGCAGTAGTTGGAAGGTTGTGATTTTTTGCAGAAAGGTGAATCTGACGTCTCG  
TGGTACCGGTGGAAAAAAAACGATTCTACTTCTTTTGCATGAAATCGTATTCTGCTTTGATAACAAAGCAATGGACAAG  
AAGAGTTGCAACAGAAAATCG

>F\_nipponica\_gi561844698  
ATGATGAAGAATTCAGTCTTGGTTATCTTTCTGTCTAGTATATGTCCTTGTCCAACCTTATCAAGCTTTCAAATGCTGAAC  
CATTTGAGTACATGCAGTTTGTGCTCCAGTACCCCTTGGAGTTTGTATGGTACACAAAAGGTGATTGCAAAATCACC  
TCTGCCTACCAAGTTTTCCGTTTACGGCATCTGGCCGTCAAACCTTCTCCGATACACGAGTCGTTTGTAGGCAAGCACTG  
ATAAGTCACCCCTTTGATAATGCGCAGACGACGTCGTCTCTGAAGACTGATTTGACAACTGGCCATCTGTGATAACAA  
AAAATAGCGACATGCAGTTTTTGGCAACATGAGTATGAGGAGCATGGCGCTTGTTCAGTAGACAAGGGTGTACCACCGTT  
CACCCAGAAGTCTACTTTGAGAGAGGAAACCAGCTCTGGAACATGCAATATGACATCCATGCCTGCTTGTATCAAAGC  
AACATCAAACCAGATTCTTCAAAGCCA

## Supplementary File 2

>Rmultiflora\_4  
TCACAATTAATTTCCACAGGGTCTATGACTATTTCAAATTTGTTGTACAATGGCCACCAGCCCCTGCAGTGTTTTTTA  
AATGCCACAATAGTAACCCGCCACACATTTACACCATCCATGGCCTATGGCCAAAATAATCGTTCTAAGGCAGTCGGGAA  
TAAGTGCCAGGGATCGTCATTTCAAAGCCGGCTCCTCCATTGGAAGCCAAACTGAAGATCTCTTGGCCTAACCTAGAA  
AATTCGAGTGATGCGCACTTTTGGGAACTTCAGTGGAAACAAACATGGCAAGTGTTCGGAGCCGACATTTACGCAATCCC  
AATACTTCGATCGAGCCCATCAAATTTGGATGATGGAGAATATTAATATTACTAGTATCCTCCAAAATGTAAACATCGT  
ATCAGGGAAAACAAAAGCTACGAAGAGATAGAATTTCCCATGAAATCAAAAACCTACAAGACACCCTCCTTCACTGC  
ATAAACACTCAGAAGTTGCATGAAGTGGTACTTTGCTGGGACCATGCTGCAAAAAAATGATCGACTGTAAACATACAG  
AAGCAACATGCTCAAGGAATAGTCCAATTGAGATTCTA

>Rmultiflora\_8  
CAATACTCATTTGTTTTTGTGTCAAGGCCTCATTTTGGAAATTTAATGTTTCGTTTGTCTTGTGTCACAATTAATTTCCA  
CAGGATCGTATAAATATTTCAAATTTGTTGTACAATGGCCACCAGCCCCTGCAGTGTTTTTAAATGCCACAATAGCAA  
CCCGCCAAAGATATACACCATCCATGGCCTATGGCCAAGTAATCGTTCTAATGCAGCTCGCAGTAAGTGCCAGGGATCG  
TCATTTCAACAACCGGCTCTTCCATTGGAAGCCAAACTGAAGATCTCTTGGCCTAACCTAGAAAATTTGAGTGATGCGC  
AGTTTTGGGAACCTGAATGGAACAGACATGGCAAGTGTTCGGAGCCGACATTTACGCAAACCCAATACTTCAATCGAGC  
CCATGAAATTTGGATGATGGATGACATTAATATTACTGATATCCTCCAAAATGTTTACATCGTATCAGGGAAACAAAA  
ACCTACGCAGAGATAGAATTTCCCATGAAATCAAAAACCTCAAAAGACAATCCTCCTTCGCTGCCTAAACCCCTCAGAAGT  
TGCATGAAGTGGTAATTTGCTGGGACCATGCTGCAAAAAAATATGATCGACTGTAATCGTACAGAAGCAACATGCTCAA  
CAGCAGTCTAATTGATGTTCTA

>Rchinensis1\_3\_Rchinensis2\_27  
ATGGCAATGTTGAAATCATCGTTTCGTTTTAATTTGCTCTTGGCTTTTGGCTCTCTGTTTCACTATGAGCATTGGTTCCCTATG  
AATATTTTTAAATTTGTGGTACAATGGCCACCAGCCCCTGCAGGTTAGAAAATGCACACCCCAAGCCTTGAACAGAA  
AATTTACACCATCCATGGCCTATGGCCGAGTAATTTCTAAAGCTGTTGTGTATAAATGTCCGGGATCGTCTTTTCAA  
AATCCGGTCTCCTCCATTGGAAGCCAAACTGAAGATCTCTTGGCCCAACCTAGAACGTCCGAACGATGCAATGTTTTGGG  
CACTTGAGTGGGACAGGCATGGCAAGTGTTCGGAGCAGACATTTACACAAACCCAATACTTCAATCGAGCCCATGAAAT  
TTGGGTGGGGAAGAATATTACTGACATCCTCCAGAGAGCTAGCATCTTATCGGGGAGACAAAAGACTACGGAGTTATA

GAATTAGCCGTACGATCAAAAACCTAAAAGACACCCCTCCTTCGCTGCGAACAACCAAAGCAGAAACCTACGCAGAAAC  
CTACGCAACCTACGCAGCGGACTCAGTGGTTGCATGAGGTGGTACTTTGCTGGGACTATCATGCCAAAAATATGATTGA  
CTGTGATGATACAGAAGCAACATGTCAAGATACTTTTCCAATCGATATTCTG  
>Rchinensis2\_16\_Rchinensis3\_17\_Rchinensis4\_40  
ATGTCTACAGGGTATTACGAATATTTCAAACCTTGTGCAACAATGGCCACCAACCCTTGCCAAAATGCAAACCTGCCGCA  
GAGTACCGCCACCTCGCCTCTTTACCCTCCATGGGTTTTGGCCATCTAATTATTCAAACAATGTCGTGGCTAATTGCAC  
TAACGCAATATTTCAACGGATGGATCGCTCATTGGTATCTAAACTGAATATATCTTGCCCAATGTGAAATATCCGAAT  
AATATCCAGTTTTGGGATAAACAGTGGAGAAAACATGGCTCATGTTCCGTGCACACGTTTAACCAAACAGAGTACTTCA  
CGCAAGCGGATAATCTTTGGAACCTCACACAACATTACTGATATTCTTATAACTGGTGGGATCAAGCCAAATGGATCAGA  
ATATGCATACGATACGGTAGAGCGGCCATCCAAATTGCAACCGGGAAGGAACCCGAACCTTGGTTCGCGCACCATCCTCC  
CTTGGAAGGCAATTGTTGCATGAAGTAGTACTTTGTTATAATCATAAGGGAACAACGCCCATCGACTGTAACCCTTTAC  
ATTCAACCTGCGATCGTAACTTCCAAATAAAGTTTATT  
>Rchinensis3\_9\_Rchinensis4\_28\_SRNase26  
ATGGGGATTAATGTCATCTGATTCTTCTCTGCCTTATCAGCAACGTTGCTAGTGCAGCCAACACATACGATTATCTTC  
AACTAGTACTGCAATGGCCAAACACGTTCTGCATCAGTAACCAAAGTGCATATCAAATCTCCCCTAGACTTCACCAT  
ACATGGGTTATGGCCTAGCAATTTCTCCGGCCAAAATAACCCATGTGTGGGTGCGCCATTTAATAGAGCTCAGATGTCC  
GCGAACTACCGTCTTCAAACCATATTGCTCCCATCCTCGTGGAGAAGCTACCTTATCGCTGTCTCCAACACAAAACCTTCT  
GGCAGACTGAGTATAACAAACATGGTACATGTTCCGGAGCTCAATTTGCCACAGACGGAATACTTCACCAAACCCATTG  
GCTATGGATGGTCAACAACATTTATAGTATATTTTCGTCTTCGGTAAACAGACAAGGATATCCAATCTTGCCGGGTTTC  
ACCTATGACTACGCCGATCTTCTTGCCGAGTTCAACTAGGAATCGGTGGCGTCACTCCCGTGCTTACTTGCATGGTCA  
TAAATAACAACCAATACGTTCTTACGAAGTGGTTATTTGTTATGATGCCTTGGGGATCAACCGCATCCATTGTGTGCG  
ACAATCGAGTTGCTCTTTTCGCTCCTAACGGACGTGTGCTCTATCCT  
>Rchinensis3\_6\_Rchinensis4\_44\_2\_SRNase30  
ATGGAAACGGCATTGCTATGTACAGTCTCCATGCTGGTTATTTCTGCTTTTTCCATCCGGTGCTAAAGCCGCGAATCAGT  
ACGACTATCTTCAATTTGTTCAACAATGGCCGATAACCTTGTGCTACAACAACCCAGCCTGTATTCCAGGAGCATCACT  
CCCCTGGACTTCTTTATCCATGGGTTATGGCCAAGCAATTTCTCTGGCCAGAATCAGCCCTGTGTTGGTACTCCGTTT  
GACTATAATGAGATGCTTAGTCAATATCGTCTCCGAACCAAATGCTACCATTCTCATGGCCAAGCTTCACTCGTAGAT  
CCAACATGGGCTTCTGGAAATATGAGTATAATCAACACGGCACTTGTTCGGAGAATAACCTCGCGCAGACGGACTATTT  
TTACAAAGCCTATGCTCTCTGGATGCGCTACAATGCAAACCTTTATATTATATGCATCTACAGTTATAACCAGGCCACAAG  
ATTGTGCCGGGATACCTCTACCATTACGCTGACCTTCTAAACTCCGTTCAACAAGCAATTGGTGGATTCACTCCTTCGC  
TTATGTGCAAGCACGAGCCTGCAAATAATACTTGGATTCTGCACGAAGTCATCATATGTTTTGATGCCATGGGGAACAA  
CGTCATCAATTGTGTTAGAGGATCTAGTTGCTCTGCCACTACCACCGGTATATACACTATCCTTTGCAA  
>Rchinensis3\_10\_Rchinensis4\_44\_SRNase36  
ATGGCACAAAATAATATGGCTTACGTCCTCATGACCTGCACTACTGTTGCCTTACTCTTTACTCTGGCCTCCTCGTATA  
CCGCCTACGAATACTTCTTGTGTTGTTCAACAGTGGTCCAAGACCGTTTGTGGTAACAGCTGCAAAGCTCCCTCTCCAGT  
TTTTACGATACATGGGTTGTGGCCCTCCAACCACACTGGCCCTCAGCTGAAGTGCATGGTGCAGCATATAATCCCACA  
GAGATGAACAACCAACCCATCTTGAAGAAAGAACCTTGAACATAATCATGGCCAGATGTTATTTCATGGGCAGCATGAGA  
TTTTCTGGATACACGAATGGGGCTTCCACGGCAAATGTTTCAAGATCTCGTCTTCCACAGACGAAGTATTTTGGAGCGCAG  
CCATGAAATGTGGACCGATATGGTCATAGGAGATATGCTTAAGAAGGCGTCCATCGTCCCCGCGCCGGAGCAAAGTAT  
AGCCTTCCCGACATTGAAAAGGCCATCAAAGCCAAGACTTCGCACGACCCATTAATCCGCTGCTTCAAGAATCAGTTGA  
AGGAAGTAGCATTATGTTACGATTACTATGGCAAAAACGTGGTTGACTGTGATAAATCGCAAAGCAATTGCCCTCAAGC  
TCCAACCTTATAGAATATCCGAAC  
>Rrugosa14\_8  
TGGCCTGGAGCATATTGCGACACAAAGCATAGTTGTTGCTATCCAAAGTCAGGGAAGCCTGCAGCAGATTTCCGGCATT  
ACGGTCTCTGGCCAAACTACAAGGATGGCTCTTACCCTTCAAACCTGTGATCCAGACAGTGTCTTCGACAAATCTGAGGT  
ACACGACACCTTTACTTTAATCAACATATATATAACCTTAATATCAGAGTTGATGGGCAATCTGGAAAAGAGTTGGCCA  
TCTATGAGCTGCCAAGCAGTAATGGTTACAGGTTCTGGTCAACGAATGGGAGAAGCATGGCACTTGTCTCCGAATCTG  
AACTTGATCAGAAAGATTACTTCCAAGCCGGTCTCAAGCTCAAGGAAAAGCAAACCTTCTTCAAGCCCTTAAAAAAGC  
TGGAATTTAGTTCGTTTATACTCAATTGTTTATAAGAAATTAACCAAGCTAGAT  
>Rrugosa14\_9  
ATGGCATTCCTAGCAGTTAGGACACTAATTGTTCTTATGCTTATTTCTACATTTGCTAATGCCGCAAACAAATATGACT  
ATCTACAACCTAGTGAACAATGGCCTAAAACGTTCTGCCATAATAACCAAGCTTGCATTCAGGTGCAGCCCTCCCGGA  
GCTGTTCTCGATACATGGTATGTGGCCATCTAATTTCTCCGGCCAGAACGACGCTTGTGTTGGAACCTCGGTTACAGCATG  
AGAGAGATGCGTCGACACAATCATCTCGAAACTCAATTGCTGTCTCATCCTCATGGCCAAGCTACACTGGTCTGTCCAACC  
TGCATTTTGGGAGTACGAGTATAACAAGCACGGCACTTGTTCAGAGAATAACCTCAAACAGACGGACTATTTACCAG  
AGCCGACGCTTTGTGGAGGCGCTACAATGTTACCAATATGCTTTTAAACATCGCGCCACCAAATCTCGCCAGGATCCTCC  
TATCGT  
>Rrugosa14\_13

ATGTCTCTAGGTTTCATATGATCATTTTTAAATTTGTACAACAATGGCCACCGGCCGTCTGTGACACGTCTGGCTGCAACA  
GATCGGGTTATCACGCTTCACGATCCATGGCCTTTGGCCAAATAATAAAACGTATGTGAAAAATCAACCGACTTGTCT  
TACCAATCAGACCAACTCATTTAAGGCTGCGATACTCACTAATTCGAATTTGGTAAGCAAGCTGAGCACCTCTTGCCC  
GATGTGAAAAATGCAAATGATAATTTTTTTTTGGAAGAAACAATGGGACAAGCATGGCACATGTTCCCTTGACAGACATACG  
ACCAAGCACAATACTTCGAGCGGTCATACAACATGTGGAAAGAAACCAACCTGACAAACACCTTGATAGCCTTATCAA  
ACAGACACCGAGACAACAGAACGTCACAGATATAGAACAACCTCATTCAAGGAGTAACTGCAACTGAAAAGAAACCCCTC  
CTCCGTTGTGAACAATCTCATAGTAATGCCAGTAAGTCTCTCTTGAAGAGATTGTCATTTGCTATGCACACAACGGGA  
TTACTGTGATCGATTGCGTCAGTCAACCAAATCCACCTTCGAATGCTATGACGGATTTTGGTTTCCT

>Rrugosal4\_18

CCCAGTGTGGCTTTTGTGTCGTCCTGCTCTAGCTTTGGTCTTCAGTCTGACGTCATCATATACACCCTACCAATACCTGT  
TGTTTGTTCACCGGTGGCCAAAGCCTGTTTGTATGATATCAACTGCCCTAACACTCCCCCTCCAATCATCACAGTACA  
CGGTCTATGGCCATCGAACTATAATGGACCTCGCTTGAAGTGCTCAGGCGTTATGAGTCACCAAACAGTACTAAAAGCA  
AACTTGGAAACAACGTTCTTGGTCGGATGTGGAAAAGGGAAACCATATGGGTTTTCTGGAAGCATGAGCAGCAGGCTCATG  
GACAGTGTTTAGACACCGTCTTTCCAGTTTCCACATACCAAATATTTCCAATGGTGTACGATATGTGGAAGAA

>Rrugosal4\_19

CCCAGTGTGGCTTTTGTGTCGTCCTGCTCTAGCTTTGGTCTTCAGTCTGACGTCATCATATACACCCTACCAATACCTGT  
TGTTTGTTCACCGGTGGCCAAAGCCTGTTTGTATGATATCAACTGCCCTAACACTCCCCCTCCAATCATCACAGTACA  
CGGTCTATGGCCATCGAACTATAATGGACCTCGCTTGAAGTGCTCAGGCGTTATGAGTCACCAAACAGTACTAAAAGCAAAC  
TTGGAACAACGTTCTTGGTCGGATGTGGAAAAGGGAAACCATATGGGTTTTCTGGAAGCATGAGCAGCAGGCTCATGGAC  
AGTGTTTAGACACCGTCTTTCCAGTTTCCACATACCAAATATTTCCAATGGTGTACGATATGTGGAAGAAAAACGTGA  
TAGGCGAGATCCT

>Rrugosal4\_28

TTTGTGCAACAATGGCCACCAACTTTTTGCAAAATTAAAAACTGCGTCCCAAACACACCCAGAACTTCACCATCCATG  
GTTTGTGGCCAAGTAATGCTTCATACAGTTCGGCGGGTTTTGTGTCTGGAGCGGTATTTAACTTCAATTTGGCAGGTGC  
GTTAGCACCTCTATTACAAAACCTTTGGCCAGACCTGGAAAAATGGTAACGCCACGAGATTTTGGAACTTGAGTGGGAT  
AGACATGGCAAATGTTCCGACCAGACATTAGACCAAAGAAAGTTACTTCACACAATCCCAACAATTTGGACTAGATATC  
ACATTTCTGATATCCTTAAAAACTCTCAAATAGAGCCAGATGGTAGTTTTGTACTCTTACACATCAATAGAATCCTCCAT  
CCGA

>Rrugosal4\_35\_Rrugosal19\_36

CCGGCCGGACAGCCGTATTATGACTACCTGCAATTTGTACTGCAGTATCCCAGAACAGTGAATCCAATATCAAAATTAG  
ACAAGGTTTTACCATTCATGGCCTATGGCCTAGCAATTACAGCGGATGTCTCTGAACAAAAGCGGCCTTCGAGATGA  
ACTCCTTCACTCTTGGCCCAATGTAGAGACTCCAAACAATTCGGACTGGTTTTGGAGCTACGAATACAATAAGCACGGC  
ACCTGCACCAAACCTCATATTCACGGAGCCGAGGCTTACTTTAAAAAAGCAGATGACTTGTATCGCACACCACCTTTGG  
ATAATTTATTCACCCGCATCAGCATCCCCGCGGGAGAGCTAGTCGACACGCGAACATTTAAGAACCAGGTAAGGTA  
GATTGGAGGGATTCCACGACTGAGGTGCAGTCAAACCAATGGAACCCTACTGCAGGAAGTAGTTATTTGTTACAATAAA  
ACTGCAACTAATGTGACTGATTGTGCAAAAAAAAAAACC

>Rrugosal4\_39

AATGTGGAGCÄCTTGAGATTGGCCCTGACCAATCCAAATGCTTATTGCTCATTAAGCGCTTGTGTTGCACCTATTCCAC  
AGTCTTTTACTCTTCACGGACTATGGGATCAGAATTTTGTCAAGATTAGTGGAAATAACCCCTTGAAGTCAATTCATCT  
AAGAGGAGTTTCAACTCAAGATCTTCTCACCTATTGGCCAGACCTGTCTGCAGATCGAGCAATCCATGGGAGAATCAAC  
TGCTTTTCATTTGGAGGCATGAATGGGGATCCCATGGTGCACATATA

>Rrugosal4\_40

CCAGATAGTTTCTTGATTGAGATCGATTTGCTAAAACCTCTCTTACCACCTCATCACCACCATGAAGTCGATTTTGA  
TTTCATTTGTACAAATTTTTATCAGTTTTCAACTTCTCCTAGCAGCGCCAAATCCACCTCAAGCCCCACCTCCAGCGCC  
CACTCCACCTCCTGATTCCCTTCATTTTGGTCATTGTGTGGCCCAATACCTTCTGTCTTTTGGAGTCATGTCAGCTGCAT  
CCACAATCTTTTACACTACATGGATTGTGGCCACAGGCGAATGGGAAATCCTTGAAGATGATTTGAACAAGTATTGGC  
CAGACTTGACGCATTCCAAGTTTGAAGAGAGTAAAAGCTTTTGGATACATGAGTGGGAAAAACATGGTTCGTTGCTCTGC  
AAAGAGTCTGCTAATTACTTGAACCTGGTTTTTGTATCTGATGAAAAACATGATGTGGAACAGATATTTAAAAACAAT  
GGTAAGAAA

>Rrugosal19\_15

CATGCAATTTGTACTCCAGTATACCCACCTGGAGTTTGTATGACACATCAAAGGTTATTGCATCTCACCTCTGCCAA  
CCAAGTTCATGTACATGGAATATGGCCTTCTAACTTCTCCGATATACATGTCAGTGTGGTCAAGCACTGAAGAATAA  
CCCCTTTGATAACCGCAGGTGTACGGATTTGGTAACTCATGGCCTCCGTGTTAACAACAAGAGCAATATGTGGTTT  
TGGGAGCATGAGTACAAGAAACATGGCGCATGTACAGTAGAGTCAGGTGTACCACCTTCACTCAAAGTCTACTTTG  
AGAAAGGACACCAGCTATGGAACCAA

>Rrugosal19\_31

ATGAAGTCGATGATGCTTTCATTTCTCACCATTTTTCTCTGTTTTCAACTGCTCCTAGCGGTGCCAAATCCACTTCGAG  
AGAAAAATTCAGCTCCTGATTCTTCTGTTGGTAATTGTTTGGCCCAATACCTTCTGTCTTTTTTTCAGAGCAATCCATG

TCAACAGCTTCCACAATCTTTTACGTTACACGGATTGTGGCCGCAGGCCGGAAGGTTCCCTCGTTGAAATGTACGAGTGTA  
CCAATGATTGATAGCATCTTAAAAGGCAACAAAGATGATTGGAAAGGTATTGGCCAACTTGAAGCACACAAAGTTCCG  
ATGAGAGTAAAAAATTCTGGATTAGTGAGTGGATTAAACATGGTAGCTGCTCCGCAAAGACTCCTGCTAATTACTTGAG  
CCTGGTTTTTGTATCTAATGAAGAAAATCAAGAAATTTGATGTGAAAAGATATTTGAAAAGCACGGTAAGATA  
>Rrugosa19\_33\_Rrugosa14\_42  
ATGAAAACCCCAGCAGCAGTCTGTCTTATTTTTCTTGCTTCTGTTATTCTGCTCAAGGGTCCCACGCAGAGCCATACG  
AGTATCTACAATTTGTTTTGCAATACTCCAAAGGCTACTGCTACAACACCCAGATATGTTTTGCGAGGTTGCCAAAAAT  
GTTTACCATACACGGTGTCTGGCCCGCAACATTTCCAATCCCCTGGTGAGATGTAAACAGTCAAAGAAACTACACCAG  
TTCAAGCAAACATGACAACATCACTGCAAAACGATCTTGGCCAATCTTGGCCAATGTGCGAAAGAGCTAAAACCAATA  
TAGGGTTTTGGAAAGAGGAATACGAAAAGCATGGGTCTTGTACTGCACCAGCTATCACACAGAAAGCCTACTTTGAGAG  
AGCTCACGAGCTGTGGAAGGAGTATGATCTCTATAACAATTTGGATAAAAAGCAGATCAAGCCGGGGCACTCATATGCA  
CTCACTGATTTTGAAGCAGCCGTCAAGTCCAAGATCGGTACCGACACAAAACCTCTCATCCTTTGTAAGCAGGCCAAAC  
TAACTCGTGGGAGCACAAACCAACTTCATTTTTGAGGGAAATTTGTGATCTGTTTTCGATCACCAGGGGACAAAT  
>Rrugosa19\_48  
TTGTTTTATTCATCCCAAAAACAAATACAGAGGGATGAAAATTTATTCCTATTCTTGCCCTCCTATTATTCCCTATTC  
CAACTGTACAGGGCGAAATGAAAATATTATGACGGTCAAATGCTTGTGTTACAAAATAGCAAAGCTGATTTATGGACGAT  
TCATGGCCTTTGGACTTACGAACTTACCGGAAAAGAACCTGATTTCTACTATAAGCAACTTAGTGGCAAGGAACGATCG  
ATACTCATTAGGGTTTTGGCCTATTAACAATAAGAATATCAGGATAACCTATCAATTTCTGGAAGTATGAATATGAAAAC  
ACAGTTCATGTACCGCAGATATATTACCAAGCTGTAGAGATTATTTAATGAAAGCAACTGTACTGTGGAATATACTCAA  
GTTAGATGATTTGCTGGGTCCTAACGGCAAGTATAAGCCAAACTCTTCATTTCAAGCCCAGGACTTGCTGAAACGACATG  
GAAGTGAAGTATAAGGTCCGACCACTGTTGAAGTGAATCTTCAGGGGAACTACTGGAAGTTTGGTTTTGTTATACAA  
AATTATGGAAAAGCATATTTTTGCGCGCGCACGACAGACTCTTGTATGGGTTCATATTAATATGTTAGGGCA  
>Rodorata\_gigantea\_3  
ATGGCACAAAACACTTGCAAAACCAATGTGGCTTTTTATCATCACTGCTCTGTCTTCGGTCTTCGGTCTGACATCATCAT  
ATACACCCCTACCAATACCTGTTGTATGTACAGCAGTGGCCCAAGTCTGTTTTGTTATGATATCAACTGCCCTAACACTCC  
CCCTCCAATCTTACGACACACGGCCATGGCCGTGCAACTATAATGGGCCTCGCTTGGTGTGCTCTGGTGGTGTGCCA  
TTTAGTGAACACTGGTAACACTTTATTATATGAATCAACAAACAATACTAAAAGCAAACTTGAACAACATTTCTTGGC  
CGGATGTGAAAAGGGGAACCATATGGGTTTTCTGGAGGCATGAGTGGCAGGCTCATGGACAATGTTTCAGATACCATCTT  
TCCACAAACCAATATTTCCAATGGTGTACGATATGTGGAAGAAA  
>Rodorata\_gigantea\_5  
ACACGCTTTCGACACGTAATAATGAATTGAAATTTATCGCATCCACAATCTTTTACACTACATGGATTGTGGC  
CACAGGCGAATGGGAAATCCTTGGTGGACTGTGCTGGTTCAGAAATGGATGATAGCACCTTAAATGGCAAGAAAAGATGA  
TTTGAACAAGTATTGGCCAGACTTGACGCATTCCAAGTTTGAAGAGAGTAAAAGCTTTTGGATACATGAGTGGGAAAAA  
CATGGTCTGTGCTCTGCAAAGAGTCCCTGCTAATTACTTGAGCCTGGTTTTTGTATCTGATGAAAAACATGATGTGGAAC  
AGATATTTAAAACAATGGTAAGAAA  
>Rodorata\_gigantea\_31  
TTTACTCTTACGGACTATGGGATCAGAATTTTGTCAAGATTAGTGAATAACCCCTTGAAGTCAATTCATCTAAGAG  
GAGTTTCAACTCAAGATCTTCTCACCTATTGGCCAGACCTGTCTGCAGATCGAGCAACCCATGGGAGAGTCAACTGCTT  
TTCATTTTGGAGGCATGAATGGGGATCCCATGGTGCACATATATGTGCAAGGTTTGGCTGCAGAAGAATCGACTATTTT  
>Rodorata07\_3  
ATGGCATTCCCTAGCAGTTAGGACACTAATTGTTCTTATGCTTATTTCTACATTTGCTAAAGCCGCAACAAATATGACT  
ATCTACAACCTAGTGCAACAATGGCCTAAAACGTTCTGCCATAATAACCGAGCTTGCATTCAGGTGCAGTCCCTCCCGGA  
GCTGTTCTCGATACATGGTATGTGGCCATCTAATTTCTCCGGCCAGAACGACGCTTGTATGCGTCGACACAATCATCTC  
GAAACTCAATTGCTGTATCCTCATGGCCAAGCTACACTGGTCTGTCCAACCTGCACTTTTGGGAGTATGAGTATAACA  
AGCACGGCACTTGTTCAGAGAATAACCTCAAACAGACGGACTATTTACCAGAGCCGACGCTTTGTGGAGGCGCTACAA  
TGTTACCAATATGCTTTTAAACATCGCGCCACCAAAATCTCGCCGGGATCCTCCTATCGTTACGCTGACATTTTGTATGCC  
ATTCGACAAGGAATTTGGGGGATACACTCCTTTGATTCTTTGCAAGCAAGATCCGGCAAATAATATTTGGATTCTGCACG  
AGGTGATAATTTGTTTTCAATCCCTTGGGGAATAACGTATCGCTTGTGCGAGAAGATCGAGATATAGTTGCAACAGCGG  
GTTGATAGACTATCCTAAG  
>Rodorata07\_11  
ATGAAGTCGATGATGTCTTTCATTTCTCACCATTTTTCTCTGTTTTTCAACTGCTCCTAGCAGTGCCAAATCCACTTCGAG  
AGAAAATTTAGCTCCTGATTCTTCTCTGTTGGTAATTGTTTGGCCCAATACCTTCTGTCTTTTTTTCAGAGCAATCCATG  
TCAACAGCTTCCACAATCTTTTACGTTACACGGATTGTGGCCGCAGGCCGGAAGGTTCCCTCGTTGAAATGTACGAGTGTA  
CCAATGATTGATAGCATCTTAAAAGGCAACAAAGATGATTGGAAAGGTATTGGCCAACTTGAAGCACACAAAGTTCCG  
ATGAGAGTAAAAAATTCTGGATTAGTGAGTGGATTAAACATGGTAGCTGCTCCGCAAAGACTCCTGCTAATTACTTGAG  
CCTGGTTTTTGTATCTAATGAAGAAAATCAAGAAATTTGATGTGAAAAGATATTTGAAAAGCACGGTAAGATA  
>Rodorata07\_21\_Rodorata\_gigantea\_19

ATGGAAACGGCATTGCTATGTACAGTCTCCATGCTGGTTATTTCTGCTTTTCCATCCGGTGCTAAAGCCGCGAATCAGT  
ACGACTATCTTCAATTTGTTCAACAATGGCCGATAACCTTGTGCTACAACAACCCAGCCTGTATTCCAGGAGCATCACT  
CCCCTGGACTTCTTTATCCATGGGTTATGGCCAAGCAATTTCTCTGGCCAGAATCAGCCCTGTATGCTTAGTCAATAT  
CGTCTCCGAACCAAATGCTACCATTTCTCATGGCCAAGCTTCACTCGTAGATCCAACATGGGCTTCTGGAAATATGAGT  
ATAATCAACACGGCCTTGTTCGGAGAATAACCTCGCGCAGACGGACTATTTTTACAAAGCCTATGCTCTCTGGATGCG  
CTACAATGCAAACCTTTATATTATATGCATCTACAGTTATACCAGGCCACAAGATTGTGCCGGGATACCTCTACCATTAC  
GCTGACCTTCTAAACTCCGTTCAACAAGCAATTGGTGGATTCACTCCTTCGCTTATGTGCAAGCACGAGCCTGCAAATA  
ATACTTGGATTCTGCACGAAGTCATCATATGTTTTGATGCCATGGGGAACAACGTCATCAATTGTGTTAGAGGATCTAG  
TTGCTCTGCCACTACCACCGGGTATATACACTATCCTTTGCAA

>Rodorata07\_31

CCCTACCAATACCTGTTGTTTTGTTCAACGGTGGCCAAAGCCTGTTTGTATGATATCAACTGCCCTAACACTCCCCCTC  
CAATCATCACAGTACACGGTCTATGGCCATCGAACTATAATGGACCCCGCTTGAAGTGCTCAGGCGCTGTGACATTTAG  
TGAAACACTGGTAACACATTATTATATGAGTCACCAAACAGTACTAAAAGCAAACCTTGGAAACAACGTTCTTTGGTCCGAT  
GTGGAAAAGGAAACCATATAGGTTTCTGGAAGCATGAGTGGCAG

>Rodorata07\_32\_Rodorata\_gigantea\_11

ATGAAAACCCAGCAGCAGTCTGTCTTATTTTTCTTGCTTTCTGTTATTCTGCTCAAGGTTCCCACGCAGAGCCATACG  
AGTATCTACAATTTGTTTTGCAATACTCCAAAGGCTACTGCTACAACACCCAGATATGTTTTGCGAGGTTGCCAAAAAT  
GTTTACCATAACGGTGTCTGGCCCGCGAACATTTCCAATCCCCTGGTGAGATGTAAACAGTCAAAGAAACTACACCAG  
TTCAAGCAAACGTTGATGACAACATCACTGCAAACGATCTTGGCCAATCTTGGCCCAATGTCGAAAGAGCTAAAACCA  
ATATAGGGTTTTGGAAAGAGGAATACGAAAAGCATGGGTCTTGTACTGCACCAGCTATCACACAGAAAGCGTACTTTGA  
GAGAGCTCACGAGCTGTGGAAGGAGTATGATCTCTATACAATTTTGGATAAAAAAGCAGATCAAGCCGGGGCACTCATAT  
GCACTCACTGATTTTTGAAGCAGCCGTCAAGTCCAAGATCGGTACC

>Rodorata07\_34\_Rodorata\_gigantea\_2

ACAGTGGCATCAGTCATTGTGCTATTTTTCTTCCACTCGGTGTGATTGGAAATGCGGTCCGGACAGCCGAATGTGACCG  
GAAATGCGGTCCGGACAGCCGAATCACAATTATGACTACATGCAATTTGTGCAGCAATATCCCAAGACATTGAATGGAAG  
CTCAGAATATACCGAGCGTTTTACCATTTCATGGCCTATGGCCTAGCAATTCCTTCGGCTACGGTTCTGATTATCTAGAT  
TGTCAAAACAGATATGCTAACCGTTATCAACTTTTCAGGACAGCTGACCAACGAACTCAAAAACACTCTCAGTTACTCTT  
GGCCCAATGTTTACTACTATTGGCACGTTACAAAGTTTTCAAAAACAATTTGATCTTTTGGTACAACGAATACCAGAAGCA  
CGGCAGCTGCGCTGTGGCCCTTCTGGGTATATTTCCCAACAGCGCAGGCTTACTTTGAAAGAGCACATAAATTTGTGGGAA  
GCAAATGATTTGCATGGTGTATTCGTCAACGACAACATCCACCCGGGAGACCGAGTCGACGCTAGCAAATTTAGGACAG  
CCCTGAGAAGTGGCAGTGGATGGAACGCTCGACTGTCTGTCGACTGGAACCGGCCTACTGATGGAAGTAGTTATTTGTTA  
TGATATTCATGCAACTCGAGTGAGGGATTGTCCTAGACGGGGGAATTTGTACGGGGCTTATATCATATCCAAAA

>Rodorata07\_35\_Rodorata\_gigantea\_26\_Rodorata\_gigantea\_27

CCCTACCAATACCTGTTGTTTTGTTCAACGGTGGCCAAATGTCTGTTTGTATGATATCAACTGCCCTAACACTTCCCCTC  
CAATCATCACGGTACACGGTTTATGGCCATCGAACTATAATCGACCTCGCTTGAAGTGCTCTGGCGTTGTGACATCTAG  
TGAAACACTGGTAACACATATTATTATGCGATTATATATGAGTCACCAAACAGTACTAAAAGCAAACCTTGATCAACAT  
TCTTGGTCCGATGTGGAGAAGGGAACCATATAGGTTTTCTGGAAGCATGAGTGGCAG

>Rodorata07\_38

ATGGATCGCTCATTGGTATCTAAACTGAATATATCCTGGCCCAATGTGAAATATCCGAATAATATCCAGTTTTGGGATA  
AACAGTGGAGAAAACATGGCTCATGTTCCGTGCACACGTTAACCAAACAGAGTACTTCACGCAAGCGGATAATCTTTG  
GAACTCACACAACATTACTGATATTTCTTATAACTGGTGGGATCAAGCCAAATGGATCAGAATATGCATACGATACGGTA  
GAGCGGCCCATCAAATTTGCAACCGGGAAGGAACCCGAACTTCGTTGCGCACCATCTCCCTTGGAAAGGCAATTTGTTGC  
ATGAAGTAGTACTTTGTTATAATCATAAGGGAACAACGCCCATCGACTGTAACCTTTACATTCAACCTGCGATCGTAA  
CTTCCAAATAAAGTTTTATT

>Rodorata07\_40

TTGTTTATTCATCCCAAAAACAAATACAGAGGGATGAAAAATTATTCCTTTTCTTGCCCTCCTATTTTTCTATTTCCCCT  
CAACTGTACGGGGCGAAATGAAATATTATGACGGTCAAATGCTTGTCTTACAAAATAGCAAAGTTGATTTATGGACGAT  
TCATGGCCTTTGGACTTGCGAACCTACCAGAAAAGAACCTGATTTCTACTATAAGCAAGTTACCGATTGTTCCACATTT  
GAAAGATTTAATTTAAATGAGCTTAGTGGCAGGGAACGATCGATACTCACTAGGGTTTGGCCTAGTAACAATAAGAATA  
CGAGGATAACCTATCAATTTCTGGGAGTATGAATATGAAAAACACGGTTTCATGTACCACAGATATATTACCAAGCTGTAG  
AGATTATTTAATGAAAGCAACTGTATTGTGGAATATACTCAAGTTTACGATTTGCTGGGTCCTAACGGCAAGTATAAG  
CCAAACACTTCATTTCAAGCCCAAGACTTGGCTGGATGACATGGAAGTGAAGTATGAGGTCCGACCCTGTTGAAGTGTA  
ATCTTCAGGGGGAACCTACCAGGAGTTTTGGTTTTGTTATACAAAAGTATGGAAAAGCATATTTTTGCGCGTCCACGACAGA  
CTCTTGATGGGTCATATTAATATGTTAGGACA

>Rodorata07\_47

CTTGGTATGATCAGAGATGCGGTCCGGACAGCCGGTCCCCAGCCTGTCCGAGAGCTGGTCCCATCACTCCCATGGAGGG  
TTGGACGGCCGTATTATGAGTACCTGCAATTTCTACTGCAAGTTCCGAGAACATTGAATCCAAGCTCAACACTTAACCA  
GAATTTACCATTCATGGCCTATGGCCTAGCAATCACAGCACTCATAATGGTGGAAATTCCTTATCTGAGCCGTAACCTC



CAAAGGAATCTCAGTCACTCTTGGCCCGATGTAAAGCGGACTGCAAACGATTTCGAAGTTTTGGACCGACGAATACAGGA  
AGCACGGCACCTGCGCAAACCGTATATTCGGTACACCAGGGGATTACTTTAGAAAAGCAGATGACTTGTATCGCAGTCA  
TCCCATAACAACGTTTTTTTTAATCTATTCGCCAACCACATCCGCCCAGGACAGCAAGTCCCCGTGAGCACATTT

>Rmoschata08\_2

AATGCTTATTGCTCATTAAGGGCTTGTGTTGCACCTATCCCACAGTCTTTTACTCTTCACAGACTATGGCATCAGAATT  
TTGTCAAGATTGGTGAATAAACCCCTTGCAGTCAATTCATCTAAGAGGTGTTTCAACACGAGATCTTCTCAACTATTG  
GCCAGACCTCTCTAGAGACCGAGCAATTTGGAAGCATGAATGGGAATCCCACGGCGCACATATATGTGCAAGGCTTGGC  
TGCAGAAGAATAGAAGTCTATTTTCAGTGTGTCT

>Rmoschata08\_11

ATGAAAACGCCAGCAGCAGTCTGTCTTATTTTTCTTGCTTTCTGTTATTCTGCTCAAGGGTCCCACGCAGAGCCATACG  
AGTATCTACAATTTGTTTTGCAATACTCCAAAAGCTACTGCTACAACACCCAGATATGTTTTGCGAGGTTGCCAAAAT  
GTTTTACCATACACGGTGTCTGGCCCGCAACATTTCCAATCCCCTGGTGAGATGTAAACAGTCAAAGAAACTACACCAG  
TTCAAGCAAACATGATGACAACATCACTGCAAACGATCTTGCCCAATCCTGGCCCAATGTCGAAAGAGCTAAAACCA  
ATTTAGGGTTTTGAAAGAGGAATACGAAAAGCATGGGTCTTGTACTGCACCAGCTATCACACAGAAAGCGTACTTTGA  
GAGAGCTCACGAGCTGTGGAAGGAGTATGATCTCTATACAATTTTGATAAAAAGCAGATCAAGCCGGGGCACTCATAT  
GCACTCACTGATTTTTGAAGCAGCCGTCAAGTCCAAGATCGGTACC

>Rmoschata08\_17

AATGCTTATTGCTCATTAAGGGCTTGTGTTGCACCTATTCCACAGTCTTTTACTCTTCACGGACTATGGGATCAGAATT  
TTGTCAAGATTAGTGAATAAACCCCTTGAAGTCAATTCATCTAAGAGCAGTTTCAACTCAAGATCTTCTCACCTATTG  
GCCAGACCTGTCTGCAGATCGAGCAACCCATGGGAGAGTCAACTGCTTTTCAATTTGGAGGCATGAATGGGGATCCCAT  
GGTGCACATATATGTGCAAGGTTTGGCTGCAGAAGAATCGACTATTTCAATTTGGTCTCTTAAACTTGCAAGCCAATGCA  
TTAACGACCTTGAAGCTCTTTTTGCCAAATACGGGAATATTCGGGATGGAAAGACCATGTATGATCCAAGATATGTACG  
CAGCATTATCTTTTCGAGAGCTAGAGGTGCATGTGTTGGTGATATGCAAGCCTCTGCGTGACAGTTACATTCTCTTTGAA  
ATTCATTTTTGCTTCACTACTAGAAATGTGGCCTATGGCCACAGCCCAACA

>Rmoschata08\_18

ATGTTATTGAATCTAATCAGCTGCTCTTATATAAGTTTTGACATTCTTCCTTTCTGTTTTTTTTTTTTGTTTTTTTTTTTT  
TCAACACAATAATGTCTCTAGGTTTCATATGATCATTTTTAAATTTGTACAACAATGGCCACCGGCCGTCTGTGATACGTC  
TGGCTGCAAGAGATCGGGGTTATCACACTTCACGATCCATGGCCTTTGGCCAAATAATAAAACGTATGTGAAAAATCAA  
CCGACTTGTCTTACCAGTCATGCCAACTCATTTAAGGCTACGATACTCACTAGTTCGAATTTGGTAAGCAAGCTGAGCA  
CCTCTTGGCCCGATGTGAAAAATGCAAATGATAAAGATTTTTGGAACAAACAATGGGACAAGCATGGCACATGTTCCCTT  
GCAGACATACGACCAAGCACAATACTTCGAGCGGTACATAACATGTGGAAAGAAACCAACCTGACAAACACCTTGGAT  
AGCCTCATCAAACAGACACCGAGACAACAGAACGTACAGATATAGAACAACCTCATTCAGGAGTAACTGCAACTGAAA  
AGAAACCCCTCCTCCGTTGTGAACAATCTCATAGTAATGCCAGTAAGTCTCTCTTGAAGAGATTGTCAATTTGCTATGC  
ACACAACGGGATTACTGTGATCGATTGCGTCTAGTCCGACCAAAATCCACCTTCGAATGCTATGACGGATTTTTGGTTTCCT

>Rmoschata08\_25

AGAACGATGGCACAAAATACTTGCAAGCCCAATGTGGCTTTTGTGCTCACTGCTCTAGGTTTGGTCTTCAGTCTGATGT  
CATCATATACACCCTACCAATACCTGTTGTTTGTTCACGGTGGCCAAAGTCTGTTTGTATGATATCAACTGCCCTAA  
CACTCCCCCTCCAATCATCACGGTACACGGTTTATGGCCATCGAACTATAATCGACCTCGCTTGAAGTGTCTGGCATG  
AGTCACCAAACAGTACTAAAAGCAAACCTTGGATCAACATTCCTTGGTGGATGTGGAGAAGGGAAACCATATAGGTTTCT  
GGAAGCATGAGTGGCAGGGTCATGGACAGTGTTTAGACACCGTCTTTCCAGTTTCCACATACCAATATTTCCAATGGT  
GTCGCGATATGTGGAAGAAAAACGTGATAGGCGAGATCCT

>Rmoschata08\_41

TTGTTTATTCATCCCAAAAACAAATACAGAGGGATGAAAAATTATTCCTTTTCTTGGCCCTCCTATTTTTTCTATTTCCCCT  
CAACTGTACGGGGCGAAATGAAATATTATGACGGTCAAATGCTTGTCTTACAAAATAGCAAAGTTGATTTATGGACGAT  
TCATGGCCTTTGGACTTGCGAACCTACCGGAAAAGAACCCTGATTTCTACTATAAGCAAGTTACCGATTGTTCCACATTT  
GAAAGATTTAATTTAAATGAGCTTAGTGGCAGGGAAAGATCGATACTCACTAGGGTTTGGCCTAGTAACAATAAGAATA  
CGAGGATAACCTATCAATTCCTGGGAGTATGAATATGAAAAACACGATTTCATGTACCACAGATATATTACCAAGCTGTAG  
AGATTATTTAATGAAAGCAACTGTATTGTGGAATATACTCAAGTTTACGATTTGCTGGGTCCTAACGGCAAGTATAAG  
CCAAACACTTTCATTTCAAGCCCAAGACTTGGCTGGACGACATGGAAGTGAAGTATGAGGTCCGACCACTGTTGAAGTGTA  
ATCTTCAGGGGGAACACTGGAAGTTTGGTTTTGTTATACAAAAGTATGGAAAAGCATATTTTTGCGCGTCCACGACAGA  
CTCTTGTATGGGTCATATTAATATGTTAGGACA

>Rmoschata17\_4

CACCAGTACCTAGCTCCCAACTTTCCAGCAACTTATCCCCATTTGACCATTACAGGTCTCTGGCCTACCAATTACAGCC  
GTCGTGCTGTTGTTTTCCGTTGAAAACGTAGTTTTACAGATTATACGCTGTCTGCTAAATTTGAAAAGGAGCTCGATAC  
GTTTTGGCCCAATGCTTATGGTCCCTCAAAGAATCAGGGTTTTTCGGATCCACGAATACCGAAGACACGGCAGCTGCACA  
AAGCTAAAGTTCAGATCAGCGGAGGATTACTTTGGAACGGCTCTTTACTGGTATAATCATATAATGACGAGTTGGATAA  
CGCATAAAGTGCCAGCTCTTTCCCAAGAAGGGTCTCACGGAGTCTTAACTAGTACGTTTTCAACGTCCGTCGAACTAGC  
GATTGGGGGAAAA

>Rmoschata17\_14

TCCTATGAATATTTTAAATTTGTGGTACAATGGCCACCAGCCACTGCAGAGTTAGAAAATGCACACCCCAAGCCTTGC  
AAAAGAAAATTTACACCATCCATGGCCTATGGCCGAGTAATTATTCTAAAGCTGTCTGTATAAGTGTCCCGGATCGTC  
TTTTCAAATCCGGTAAATGCTCCTCCATTGGAAGCCAAACTGAAGATCTCTTGGCCCAACCTAGAACTTCCGAATGAT  
GCAATGTTTTGGGCACCTT

>Rmoschata17\_31

TTCACCATACATGGGTTATGGCCTAGCAATTTCTCCGGCCAAAATAACCCATGTGTGGGTACGCCATTTAATAGAGCTC  
AGATGTCCGCAAACCTATCGTCTTCAAACCATATTGCTCCCATCCTCGTGGAGAAGCTACCCTATCGGTGTCTCCAACAC  
AGACTTCTGGGAGAATGAGTATAACAAACATGGCACATGTTTCGGAGCTCAATTTGCCACAGACGGAATACTTCACCAA  
ACCCATTGGCTATGGATGGTCAACAACATTTATAGTATTTTTTCATCTTCGGCCAACAGACAAGGATATCTAATCTTGC  
CGGGTTTACCTATGACTAC

>Rlaevigata\_12

ATGAGGCCCTAAGAGTTGTATTCTCAATTTCTAGGTGGCCTCAATCATTTTTCTTTCATGATATGCATTAATCAAAACTATA  
TACAACTGGTCCCACAGCGGGTCGGACAACCGTATTATGAGTATCTGCAATTTGTACTGCAAGGTACGACAACAGTGAA  
TCCGTCAAATCCAGACTTAAGCCATTACCCGCCTTTACCATTTCATGGCCTGCGGCCCTAGCAATTTTCAGCCGTTTTCTGT  
GATCCAATTCCTTACATTTCAAAATTTGTAATCCAAATCGAAAATATAACCCCTAAAACCTTGGGCAGGTGACAACGACCTCA  
AAAATGATCTCCGTCAATTTTTGGCCCGATGTAGAGCGTCTAAACAATTTGAGGTTTTGGACCCACGAATACAGGCAGCA  
CGGCAGCTGCGCCAACCTTGTATTTCGAAAGCCGGGAGGGCAACCTTGTACTCGAAAAACGGGAGGCTTACTTTAGAACA  
GCAGATTACTTGTATCATCATCGCATACCAATTTGTATGACTTATTCAACAACATCCGCATCCCCCGCGGCCGCTGGT  
CTGGCACAGTCAACACTACTACATATATGTTTCGAGATACGGGATGCGAATGGAGGGTTTTCCACGACTGCGGTGCAATGG  
AACAAAATAACCACTTCTGAGGGAGTAGTATTTGTTACGATAAAGATGCAATTAACGTGATTGATTGTCCATTCTTA  
GGGTGGAATTTGCCAAGTTTCATAGCATTTCGAATA

>Rlaevigata\_16

ATGATGTCCTTCAATTTCTCACCATTTTTCTCTGTTTTCAACTGCTCCTAGCAGTGCCAAAATCCACCTCCAGCGAAAAATTT  
CAGCTCCTGATTCCTTCTGTTGGTAATTGTTTGGCCCAATACCTTCTGTCTTTTTTCAGAGCAATCCATGTCAACAGCT  
TCCACAATCTTTTACGTTACACGGATTGTGGCCGAGGGCGGAAGGTTCTCGTTGAAATGTACGAGTGTACCAATGATT  
GATAGCATCTTAAAGGCAAGAAAAGATGATTTGGAAAGGTATTGGCCAACTTGAAGCACACAAAGTTTCGATGAGAGTA  
AAAAATTCGGATTAGTGAAGTGGATTAAACATGGTAGCTGCTCCGCAAAGACTCCTGCTAATTACTTGGAGCTGGTTTT  
TGATCTAATGAAGAAAATCAAGAAAATTTGATGTGAAAAAGATATTTGAAAAGCATGGTAAGATA

>Rlaevigata\_18

GGTTCACAGCAGAGCCATACGAGTATCTACAATTTGTTTTGCAATACTCCAAAGGCTACTGCTACAACACCCAGATAT  
GTTTTGCGAGGTTGCCAAAAATGTTTACCATACACGGTGTCTGGCCCGCAACATTTCCAATCCCCTGGTGGATGTAA  
ACAGTCAAAGAACTACACCAGTTCAAGCAAACGATGACAACATCACTGCAAAACGATCTTGGCCAATCTTGGCCC  
AATGTGCAAAGAGCTAAAACCAATATAGGGTTTTGGAAAGAGGAATACGAAAAGCATGGGTCTTGTACTGCACCAGCTA  
TCACACAGAAAGCGTACTTTGAGAGAGCTCACCAGCTGTGGAAGGAGTATGATCTCTATACAATTTGGATAAAAAGCA  
GATCAAGCCGGGCACCTCATATGCACTCACTGATTTTTGAAGCAGCCGTCAAGTCCAAGATCGGTACC

>Rlaevigata\_19

CCACGAGGACTCTGCTATAACACAACAAAAGTTATTGCATCTCACCTCTGCCAACCAAGTTTCATGTACACAGGATAT  
GGCCTTCTAACTTCTCCGATATTATTATGACACCTCTGCAGACGGATTTGGTAAACTCATGGTCTCGTCCGTGTTAACAGC  
AAAGAGCAATATGTGGCTCTGGGAGCATGAGTACGAGAACCATGGCGCATGTGCAGTAGAGTCAGGTGTACCACCTTTC  
ACTCAGAACTCTACTTTGAGAAAGGGCACCAGCTATGGAACCAATATGACATCCATGCAGTGTAAATCAAAGTGGTA  
TTGTACCGGGTACTGCAACATCATATACTAGCATTGTAACCCGAATCCAAAAGAAAATTTGGGAGTAAACAATACTCCTTT  
AATCAAGTGCAGGACGACTGTGAAGACCCGAAATTTTCAGT

>Rlaevigata\_21

ATGGCATTCCTAGCAGTTAGGACACTAATAATTGTTCTTATGCTTATTTCTACATTTGCTAAAGCCGCAAAAAAATATG  
ACTATCTACAACCAGTGCAACAATGGCCTAAAACGTTCTGCCATAATAACCAAGCTTGCATTCAGGTGCAGCCCTCCC  
GGAGCTGTTCTCGATACATGGTATGTGGCCATCTAATTTCTCCAGCCAGAACGACGCTTGTGTTGGAACCTCGGTTTCAGC  
ATGAGAGAGATGCGTTCGACACAATCATCTGGAAACTCAATTGCTGTCATCATCATGGCCAAGCTACACTGGTCTGTCCA  
ACCTGCACTTCTGGGAGTACGAGTATAACAAGCACGGCACTTGTTCAGAGAATAACCTCAAACAGACGGACTATTTTAC  
CAGAGCCGACGCTTTGTGGAGGCGTACAATGTTACCAATTTGCTTGTAAACATCGCGCCACCAAAATCTCGCCGGGATCC  
TCCTACCGTACGTTACGC

>Rlaevigata\_24

AACGATGGCACAAAATACTTGAAGCCCAATGTGGCTTTTTGTGCTCACTGCTCTAGCTTTGGTCTTCACTCTAACGTCA  
TCATATACACCCTACCAATACCTGTTGTTTTATCGACGGTGGCCAAAGTCTGTTTGTATGATACCAACTGCCCTAACAC  
TCCCCCTCCAATCATCACAGTACACGGTCTATGGCCATCGAACTATAATGGAACCTCGCTTGAAGTGTCTTGGCATGAGT  
CACCAAAACAGTACTAAAAGCAAACCTTGAACAACATTTCTGGTTCGGATGTGGAGAAGGGAAACCATATAGGTTTCTGGA  
AGCATGAGTGGCAGGCTCATGGACAGTGTTTAGACACCGTCTTTCCAGTTTCCACATACCAAAATATTTCCAATGGTCTC  
ACGATATGTGGAAGAAAACGTGATAGGCAAGTTCTCT

>Rlaevigata\_25

AATCTGGAGCACTTGAGATTGGCCCTGACCAATCCAAATGCTTATTGCTCATTAAAGGGCTTGTGTTGCACCTATTCCAC  
AGTCTTTTACTCTTCACGGACTATGGGATCAGAATTTTGTCAAGATTCGTGGAATAACCCCTTGAAGTCAATTCATCT  
AAGAGGAGTTTCAACTCAAGATCTTCTCACCTATTGGCCAGACCTGTCTGCAGATCGAGCAACCCATGGGAGAGTCAAC  
TGCTTTTCATTTTGGAGCCATGAATGGGGATCCCATGGTGCACATATATGTGCAAGGTTTGGCTGCAGAATAATCGACT  
ATTTCAATTGGTCTCTTCAACTTGCAAGCCAATGCATCAACGACCTTGAAGCTCTTTTGGCCAAATACGGGATTATTCG  
GGATGGAAAGACCATGTATGATCCAAGATATGTACGCAGGATTATCTTTTCGAGAGCTAGAGGTGCATGTGTTGGTGATA  
TGCAAGCCTCTGCGTGACAGTTACATTCTCTTTGAAATTCACTTTTGCTTGGATATGACAAGGGACTTTGCGGATTGTA  
CCAACCTGGTACAGGGAGGAT

>Rlaevigata\_27

ATGAAGAATTCAAACTTCATTATCCTTCTATCAGTATATGCACTTGTACAAGTTCTCAACGTTTCAAATGCTTCACCCT  
ACGAGTACATGCAATTTGTACTCCAGTACCCACCTGGAGTTTGTCTATGACACATCAAAAAGTTATTGCGTCTCACCTCT  
CCCAACCAAGTTTCATGTACATGGAATATGGCCTTCTAACTTCTCCAATATACTTGTCCGTTGTGGGCACGCACTGAGG  
AATAACCTTTTTTCATGAGGCGCAGATGACACCTCTGCAGACGGATTTGGGAAACTCATGGCCGTCGTTAACAACAAA  
ACAACAATATGCAGTTCTGGGAGCATGAGTATGGAGAGCACGGTGCATGTGCAGTAGAGTCAGGTGTACCACCTTTTAC  
TCAAAGGTCCTACTTTGAGAAAAGGACACCAGCTATGGAACCAATATGACATCCTTGCAGTGCCTCATCAAAGTGGTATT  
AAACCGGGTACTGCAACATCATACACTATGACTCAGCTTGTAAACCGCAATCCAAAAGAAAATCGGGAGTAAACAATACTC  
CTTTAATCATGTGCAGGAGGACAGCCCTTGGTTACACACTAAAGGAAGTGATAATCTGTCTGGATCACCAGGCAACAAA  
TGTGATAAGTTGCGCGCTCAATAATATTAGAAAAACAGATTGCCGAGATCCTTCGGGCAAGGTATACTATGTAGCT

>Rlaevigata\_30

TCATCATATACAGCAAAAATGAAAACACCAGCAGTCTGTCTCCTTTTCTTGCTCTCTGTTATACTGTTCAAGGGTTCCC  
ATGCAGAGCCATACGAATACCTACAGTTTGTCTTGAATACCCTAGAGGTTACTGTGTTAACGACAAGAAAATGCATTCC  
ACCGGCGAGCTTGCCAGCCAAATTCACGGTTCATGGAATTTGGCCACGAATATTTCCGAGCCGACTATCAGCTGTGAC  
AAGGCACAGAAACTACACTCGTTCAACGGAAACCTGATAACTCCGTCGTTGAAAACCGATCTTCACCGATCTTGGCCCA  
GCGTCTTGACAGATAAAGATGATATGTCGTTTTGGGAACACGAATATAATAAGCATGGGTCTGTACTGCACCAGCTAT  
CACTCAGACAGCGTATTTTGGAGAGCTCACAAGTTCTGGAAGGAGTATGATCTCTATTCCATTTTGGAAACAAAAAAT  
ATCAAGCAGGGGCAATCTCGATCGTATTCACTGGCTGATTTTGAAGCAGCCGTCAAGTCCAAGATCGGTACC

>Rlaevigata\_32

CCACCTCCAGCGCCCACTCCACCTCCTGATTCCCTCATTTTGGTCAATTGTGTGGCCCAATACCTTCTGTCTTTTTGAGT  
CATGTCAGCTGCATCCACAATCTTTTACACTACATGGATTGTGGCCACAGGCGAATCGGAAATCCTTGGTGGACTGTGC  
TGGTTCAGAAATGGATGATAGCACCTTAAATGGCAAGAAAAATGATTTGAACAAGTATTGGCCAGACTTGACGCATTCC  
AAGTTTGAAGAGAGTAAAAGCTTTTGGATACATGAGTGGGAAAACATGGTCGTTGCTCTGCAAAGAGTCTGTCTAATT  
ACTTGAGCCTGGTTTTTGTATCTGATGAAAAACATGATGGGGAACAGATATTTAAAAACAATGGTAAGAAA

>Rlaevigata\_33

TGGCCAGGCTCATACTGTACAGCAGCAAAGCAGGGTTGTTGCTACCCAAAGATTAGAAAACATCCCAGTTTCACAATTG  
GTGGCATATGGCCTTATACTTTTTGTGGGGATAGACCAACCTACTGCAAATCTAAGACCCCTTATAGTTTATCTAAGAT  
ATCAAACCTGACCAAGAGTTTGGAAAGGAATTGGCCATCACTACCCTGCCAAAGCCGTACTAGTAGCATTAGCAGTAGG  
AAACTATGGATGCAAGAATGGCAGAAATATGGGACTTGTGCGGAATCACTCTTTGGAGGTCAATACCAATACTTTTCATG  
CAGGTCTCAATCTGAGGAAGAAAAATAGACATGCTCCAGATACTCAGCAATGCAGGTCTGATCACTACTATAATCCAAC  
TTCGGATTTTCGGTTCAAATAAATTAGTGGAACTC

>Rpersica\_5

TGGCCAGGCTCATACTGTGCAGCATCAAAGCAGGGTTGTTGCTACCCAAAGAGTATTA AAAA ACATCCCAGTTTCACAA  
TTGGTGGCATATGGCCTTATACTTTTTCTGGGGATAGACCAACCTACTGCAAATCTAAGACCCCTTTTAGTTTATCCAA  
GATCTCAAACCTGACCAAGAGTTTGGAAAGGAATTGGCCATCACTATCCTGCCAAAGCCGTAGTAGTAGCAGTAGCAGT  
AAGAAACCATGGATGCAAGAATGGCAGAAATATGGGACTTGTGCAGAATCACTCTTTGGATGTCAATACCATTACTTTC  
ACGCAGGTCTCAATCTCAGGAAGAAAAATAGACATGCTCCAGATACTCAGCAATGCAGGTCTGATCACTACCATAATCCA  
ACTTTTGGTTTTTCATTTTAGGCAGACTAGTCGAACTCAGAACTTTTCACTTGTTCGGTATTGGATGCAGGAATCCATCCA  
AACGGGTCATTTTATGAGATGACTGCATTTTTCAATGCCATGCAAAGGCCACTATCTATCTTCCGGGGTTTATCTGTA  
ACAAAGACAAATCAGGCAACAAACAGCTCTACCAGATTATACTCTGTGGAAACACCGCCGGAAGTACAAGATCAGACTG  
CCTCGCAACCCAAAGATCGAATACTGGACAATGCCCCGAAAAATTTAAGTTCCCTCCCTGAAA

>Rpersica\_8

CTACAGTTTGTCTTGCAATACGCTAGAGGTTACTGTGTTAACGTCAACAAATGCATTCCACAGGCGAGCTTGCCGGTCA  
AATTACAGGTTTCATGGAATTTGGCCACGAATATTTCCAAGCCGGTATCGAGTGTAAAGCTGCACAGAAACTACACCA  
ATTTCAACAAAAAGCTGATAACACAGTCGCTGGAAACCGATCTTCTCCAATCTTGGCCAGCGTCCGGACAGATAAAGAT  
AATATGACTTTTTTGGAAAGACGAATATAATAAGCATGGGTCTGTACTGCACCAGCTATCACTCAGACAGCATATTTTG  
AGAGAGCTCACAAGTTCTGGAAGGAGTATGATCTCTATTCTGTTTTGGAACAAAA

>Rpersica\_11

CTCAGAAATGCAGTCGGAGAGGCGGCCGGACAGCCTTATTATGACTACCTGCAATTTGTGCAGCAATATCCCAGAACAG  
TGAATCGAAGCTCAAGATTAGACAATTTACCATTTCATGGCCTATGGCCTAGCAATTACAACAATATTTATGTTATATA  
TTGTGGTCAAATATCAGCGAGACTGCACCTAAAAAGCAGCTGAGCCCCGGCCTCCGAGGTAATCTCACTCACTCTTGG  
CCCGATGTAAGGAAGGCAACCCATTGGGGTGGACCAACGAATCCAATAAGCACGGCACCTGCGCCAGCCATACAT  
TCACAACGCCGAAGGAATACTTTGAGAAAGCAGATTGCTTGTATCGCAACTTCTCTGGCGGACAAAATTTGTATGATTT  
ATTCTCCGCGCAAGCAACAC

>Rpersica\_12

CCGTGCTGCTTGTCTTCTGCTTTTTCATCAGGTGCTAAAGCCGCCAATATGTACGACTACTTCCAGTTTGTCCAGCAATG  
GCCGGCCGGCTACATTCTGCTATCGTAATCCGGATTGTGTCCGGAATCCCCCGGGAATACTTTTACCATTTCATGGCCT  
GTGGCCAAGTAATTACACGACACCTGAAAAGCCATGCGTTGGCACATCCTTTAACTATTTTCTGCCGCAAGCATGGCCC  
CAGTTAATTGCTCGTTTTACCAATATGCGATTCTGGCAGAGCGAATATAACAAGCACGGTACCTGCTCGGAGAACAAC  
TCAAGCAGACGGAGTATTTTAGGACAGCGCACTGGGCGTGGGTTTCGATTCAATGCATATTTTCTGTTTGCAGACTCGCC  
TCTCCAAATCCACCCTGGTAATTACTATCTCAAAGCTGACCTTGACCAAGCAATCGGGCAGTCACTACTAAGGACCCT  
TGCTTATGTGCAAGAAGATCAAACCCATGGGCATTGATACGTGGC

>Rpersica\_14

TATTGCTTATTCTACGTTCTTTCATACGCAGTAATATGCATAGGATCTTATGATTATTTCCAATTTGTCTTACAATGGC  
CACCAACGGTGTGTAGAATGAAACCATGCATCCAGGCAAAATCCGCCAGAACTTCAGCATCCATGGTCTGTGGCCAAG  
TAATTATTTCATTCAATATGGTGCCAAGTGTCTGCGGTGGGGCGGCATACGTCCCCGCTGTGACTAATGCGTTAGCACCT  
TTACTAAGAGTCTCTTGGCCGGACGTGGA AAAAGGCAACGAACAGGACTTCTGGAACTTGAGTGGGACAGACATGGCA  
AATGTTCCGAACAAACATTA AACCAAACAAGATACTTACACAATCCACAACATTTGGAATCGATATCATATTTCTTGA  
TATCCTTAAAACTCTCAAATAGAACCAAACGGTAGTTGTACCTTTACACAGATATACAATCCTCCATCCGAAAAGCA  
ACTCAAATGACACCTCGTATTCGAACGAAGCAACTTTTAAACCGATCCTAAGAACGCATCATCGTTTGTCTTCTACTTGC  
ACGAAAATGGTCTTATGTTATAAGTATGACGGGGTGACACCCGAAAACCTGCTCGGCAGCAGGCTCACGGCAACAATATGT  
CAAATTTGCTATAAAA

>Rpersica\_17

ATGATGTTTTTCATTTCTCACCATTTTCTCTGTTTTCAACTGCTCCTAGCAGTGCCAAATCCACCTCGAACGCCAATTC  
CAGCTCCTGATTCCTTCATGTTTGTAAATGTTTGGCCCAATACCTTCGGTCTTTTTGAGTGCATCCATGTCAACAGCT  
TCCACAATCTTTTACGTTACACGGATTGTGGCTGCAGGCGAAAGGCATTTTCCTTGTCAAATGTGAGGGTGTAAATGAAT  
GATAGCACCTTAAAAGGCAAGAAAAGATGATTTGGAGAGGTATTTGGCCAACTTGAAGCATACAAAGTTTCGATGAGAGTA  
AATACTTCTGGATTAGTGAAGTGAATAAACATGGTAGCTGCTCCGCAAAGACTCCTGCTAATTACCTGAGCCTGGTTTT  
TGATCTAATGAAGAAAATCAAGAAAATTTGGTGTCAAAAAGATATTTGAAAAGCATGGTAAGAAA

>Rpersica\_20

GGCTCTATATATAGACTTACATGTTTGTGTAACCATAACGAATTCCTAGCTGGCTGCAATATCAGCAAAATGAAAACGCCA  
GCAGCAGTCTGTCTTATTTTCTGCTTTCTGTTATTCTGCTCAAGGGTTCACACGCAGAGCCATACGAGTATCTACAAT  
TTGTTTTACAATACTCCAAAGGCTACTGCTACAACACCCAGATATGTTTTGCGACGTTGCCAAAATGTTTACCATACAC  
GGTGTCTGGCCACGAACATTTCCAATCCCCTGGTGAGATGTAAACAGTCAAAGAACTACAGCCGTTCAACCAAAACG  
TGATGACAACATCACTGCAAAACGATCTTGGCCAATCTTGGCCCAATGTGCAAAAGAGCTAAAACCAATATAGGGTTTTG  
GAAAGAGGAATACGAAAAGCATGGGTCTTGTACTGCACCAGCTATCACACAGAAAGCGTACTTTGAGAGGGCTCACGAG  
CTGTGGAAGGAGTATGATCTCTATACAATTTTGGATAAAAAGTCAGATCAAGCCGGGGCACTCATATGCACTCACTGATT  
TTGAAGCAGCCGTCAAGTCCAAGATCGGTACC

>Rpersica\_23

AGAACGATGGCACA AAAAGACTTGCAAGCCCAATGTGGTTTTTGTGCTCACTGCTTTGGCTTTGGTCTTTCAGTCTAACGT  
CATCATATACGCCCTACCAGTACCTGTTGTTTGTTCACAGTGGCCAACTCTGTTTTTATGATATCAATTGCCCTAA  
CACTCCCCCTCCAATCGTCACGGTACACGGTCTATGGCCGTCAAACATAAATTCGCTCGCTTGAAGTGTCTTAGCGGT  
ATAAGTCACCAAACAGTACTAAAAGCAAATTTGGAACATTCCTGGCCGATGTGAAAACGGGAAACCATATGGGTTTTCT  
GGAAGCATGAGTGGCAGGCTCATGGACAATGTTTCAGACACCGTCTTTCCACAAAACCAATATTTTCAATGGTGCCTGTC  
ACGAATGTGGAAGAAAACGATAGGCGAGATCCTTGAAGGTCGACGTCATCATCCAGGACCCAAAAGTATAGC  
TTGTCTGCCATAGAAAATGCTAACAGAGCAAACACTTCGCATGACCCTTATATTCGGTCTGCCAAAGGTTCCGGAAGAT

>Rpersica\_25

ATGAGTGGTGGAGCCTATCATTTTTTCCAGTTTGTGCAACAATGGCCACCAACTCTTTGCAAAATTA AAAAATTCGCTTG  
TCCCAAACGCACCCAGAAAACCTCAGCATCCACGGTTTGTGGCAAGTAATGCTTCATACAGTTCCGGGGGTTTGTGTCC  
TGGGGCGGATTTGACTACGGTTTGGCAGGTGTGTTAGCACCTCTATTACAAAATCTTGGCCGGACGTGAAAAAGGT  
AACGACACGAAATTTTGGAAAACCTGAGTGGGATAGGCATGGA AAAATGTTCCGATCAGACATTCGACCAAAGAAGATACT  
TCACACAATCCACAACATTTGACGAGATATCATATCTTAAATATCCTTAAAAACTCTCAAATAGAACCAAATGGTAG  
TTTTTACTCTTACACATCAATAGAATCCTCCATCCGAAGTGCAACTCAAACGAGACCCCGTATTCGAACAAGGAATCTT  
CCAACCTGATCCTAACACAATACTGATGCTCACTACTTGACGAAATAGTCCTTTGTTTTAAGTATGATGGGGTGACAC  
CGGACAACCTGCTCCGCGGTAGTCGGACCACCAGGAGATGTCAAATTTGAA

>Rxanthina\_2

CCAATTCCAGCTCCTGATTCCCTTCATGTTGGTAATTGTTTGGCCCAATACCTTCTGTCTTTTTGAGAGCGATCCATGTC  
AACAGCTTCCACAATCTTTTACGTTACACGGATTGTGGCCGAGGCGAAAGGCATTTCTTGTGCAAAATGTGAGGGTGT  
AATGAATGATAGCACCTTAAAAGGCAAGAAAGATGATTTGGAAAGGTATTGGCCAAACTTGAAGCATGCAAAGTTCGAT  
GAGAGTAAATACTTCTGGATTAGTGAGTGGAAATAAACATGGTAGCTGCTCCGCAAAGACTCCTGCTAATTACTTGAGCC  
TGTTTTTTGATCTAATGAAGAAAATCAAGAAATTTGATGTGAAAAGATATTTGAAAAGCATGGTAAGAAA

>Rxanthina\_7

ATGGGTGGTCTCCACTACAAATTACCTACACTTGTGAGTGTAGTAACAGTGGCATCAGTCATTGTGCTATGTTTCCTTC  
CACTTGGTGTGATTGGAAATGCAGTCGGAGATGGACAGCCGGTCACAGATGCGGTTCGGACATCCGCCAGATATCAGTA  
CATGCAATTTGTACTGCAAGTTCCCAAACGGTGAATCCATACTCACCTAACCAATACCCGCATTTGACCATTTCATGGT  
CTATGGCCTGGTTTTTCCGACAATAGTCGTCTTGAATTTTGTAAATCCGCCATCTTATGACCAGCATCAACTTTCAACGC  
TGCCCCCCTCAAATAATCTCGCTCACTCTTGGCCCAATGTAAAGAGTCCAAACAATTTGGAGTTTTGGTCCAAGGAATA  
CAACAGGCATGGCAGCTGCGCCTACCATATATTGGCTGGATTGAAAACCCGAAGACTTCTTGGAGGCTTACTTTACA  
GAAGCAAATAATTTGTATCGCCCTCAGTACGCACAACATTTGTATCAGTTATTCCACTACATCCGCCGCCAGAGCCCGT  
ATGCCATTGTCCGCAACAGCCAGTCTGGCAGGATCGACATTTGGAGTTATTTGCAGGCGATTGAAAATGAGAATGGAGG  
GAAAGCTCCACGACTGTTGTGCAATGAAACAAATAGCTACTTACTGAAGGAAGTAGTTATTTGTTACGACATGTTTCTA  
AAATACGTGATTCCATGTCTTTTTTCCAATAGGGAAAGTATTGTCCGCGGTTTCATATCATTTCCAATA

>Rxanthina\_8

TTGGGATCTCCACTACATACACTACCTACACTTATGGCTGCAGTAACAGTGGCATCAGTCATTGTGCTATTTTTCTTC  
CACTTGGTGGCAGTACAGAAATGCAGTCGGACAGCCGGTTCGGACAGCCGATTATCAGTACCTGCAATTTGTACTGCAATA  
TCCCAGAACAGTGAATCAAAGCTCAGATATTGAAAAGAGATTACCATTTCATGGCCTATGGCCTAGCAATTACAGCAAG  
GCTCAAAATCGTCGTGTTAGAAAATTTGTAGTCCAAAATATCCCGCTGATATTTCTTTTAAAGCAGAATCTCGATGAGTCTT  
GGCCCGATGTAGTATATTTAAACAATTCGAATTTTGGACCAAGCAATACAGAAAACGCGGACAGCTGCGCCAACCATAC  
ATTACACCCGACAGGATTACTTTAGAAAAGCAGATGACTTGTATCGCAAACATTTGGAATGGTTTTGTATAATTTATTCGTC  
GACGGCGGCATCGTCCCGGAAAAGCCAAACAACACTGGCACATATACGAATCTCGTACAAAATGCGACTGGAAGGAAAC  
TTCCACGACTGCGGTGCGAGGGGAAACCTACTGAAAGAAGTAGTTATTTGTTACAATAAACTGCAACTGAAATTTATTA  
TTGTCTTCAGACATAGGGGAGAAATTTGTGTGGGGTCCATATTAATACCAACAGGAATTTCCCTTTATGGTCCAACCATA  
TTGGTATTGTCTTTAGTTTACCCTTGGGGCTAATTATCTTTAAATATGGTCCAAGCTATATTAATCTAAGCTAGCT

>Rxanthina\_9

ATGGCATTGCTAAGTACAATAGCCGTGCTGCTTGTCTGCTTTTTTCATCAGGTGCTAAAGCCGCCAATAAGTACGACT  
ACTTCCAGTTTGTCCAGCAATGGCCGGCTACATTCTGCTATCATAATCCGGATTGTGTCCCAAATCCCCCGCACAGTAC  
TTTGACAATTCATGGCCTTTGGCCAAGTAATTACACGACACCTGAAAAGCCATGCGTTGGCACACCCTTTAATGTTTGC  
TGCCCCAAACCATGGTTTTGAAAGACTATTTTCTGCCGCAAGCATGGCCCCAGTTAATTTGCTCGTTTTACCAACATGCAA  
TCTGGCAGAGTGAATATAACAAGCACGGTACCTGCTCGGAGAACAACCTCAAGCAGACGGAGTATTTTAGGACAGCTCA  
CTGGGCGTGGGTTTCGATTCAATGCATATTTTCTGTTTGCAGACTCGCCTCTCCAAATCCACCCTGGTAATTACTATCTT  
AAAGCTGACCTTGAACATGCCATTCGGGCAGTCACTACTAAGGACCCTCTGCGTATGTGCAAGAAGATCAAACCCATGG  
GCATTGATACGTGGCTAGAAGTCATCATCTGTCTTGTATGTTTTGGGAGTCCAACCGATCCCTTGTGCCCCCTCGATTACC  
AACTTGCTCGGTCCAATTATATATTTATGGTTAC

>Rxanthina\_11

CTTTGCAAATTAACCATGTCAGTCTTCAAAGGAAATTCGGTCTCCTTCTTCTTGTTTTAGTACTGTTTTCTCTCCAGC  
ATGGAAGTGAATCACTAGGTAAACCCTTTGAATATTATCAACTCGTGTATGCGATGGCCCAAAGCAGTTTGTACCATAA  
ACCTGATGAGCCGTACAGGTGTGTAATGGAAGCAGATCGTGTGCCGTTGAGGTTTACCCTCCACGGCATGTGGGCTCC  
AACTGGATTAATGTGGGAGATGGAATTTGATTGTGATGAGGCTGGAACACCATTTAGATAGATGAGACATTGCAAGAAC  
AACTAAAGCAAAGCTGGCCGACGTTACTGGATAACTATCCAAGTATGAAATTTTGGCAACACGAGTATGATAAGCA  
TGGCCAATGTAGCCAAGACACTACTACTCAGACTGAGTACTTCTCACGCGCTCACAAGTTGTGGCAGGAATTGCAGGCT  
GTCTACCAAGCATTGCGGATGAAAAAATCGTACCAGCAGCTGACAAAACATACACCTACACCAGCTCGAGCAAGCTA  
TTGGAAAACGATTCGGCAGTAATTTGGAAGGTTGTCAATCTTTGCAGAAAGGTGAATCTCTCACCTGGTGGTCTGGACC  
AAAACAAATTTCTACTTCTTTTGCATGAAATCGTATTCTGTTTCGATAACAAGCAACGGAGAAGAAGAGTTGCAACAGA  
AAAACAAATTTGTGAGAACGCGAAAACCTATAACCTTCATAAAT

>Rxanthina\_13

AGAACGATGGCACAAGAGACTTGCAAGCCCAAAGTGGCTTTTTGTGCTCACTGCTCTAGCTTTGGTCTTCAGTCTGACGT  
CATCATATACACCCTACCAATACCTGTTGTTTTGTTCAACAGTGGCCAAAGTCTGTTTGTATGATATCAACTGCCCTAA  
CACTCCCCCTCCAATCATCACGGTACACGGTCTATGGCCATCGAAGTATAATGGACCTCGCTTGAAGTGTCTGGCGGT  
ATGAGTCACCAAACAGTACTAAAAGCAAACCTCGGAACAACATTCCTGGTTCGGATGTGAAAAGGGAAACCATATGGGTT  
TCTGGAAGCAGGAGTGGCAGGCTCATGGACAGTGTTCAGACACCCTCTTTCCACATACCAATATTTCCAATGGACTCA  
CGATATGTGGAACAAAACGATGATAGGCGAGATCCTTGAAAGGTGCGCCATCATTCCAAGACCCAAAAGGTATAGCTTG  
TACGCCATAGAAAATGCCATCAGAGCAAACACTTCGCATGACCCTTATATTCGCCGTGCCCAAAGTTTCGGACAAT

>Rxanthina\_21

CTTGTCCAAATGTGGCCACCGGGTCATTGTCATTTCCCACCACATTGCACTGCACCGATACCTCGGAACTACTTTAGTG  
TGCATGGCTTATGGCCAAGTAATCACAGTGTGCCAAGATTACATGCAAGAATGCATATGTTCCCTTCTCCGAAACACT  
GGTACGGCGCAACAACCCCTACTGCAGGACCTAAGTAAATATTGGCCAGACTTGGAAAAGAGGGAAAGATTTTCAGATTC  
TGGGAACATGAGTACAGGGATCATGGGAGGTGTATGTATAACATACACAGGGAGCACCAAATTCCTTGAGGGCAGCTG  
CACCAGCCCTTTCAAAAAAAAAAAAAAAAAAGTCCCTATTCCGTTCATCTCTCATACAATCAATCACTTTAATGCCCTGCT  
TAGAATAACT

>Rxanthina\_23

ATGGAAACGGCATTGCTAAGTACAATAGCCGTGCTGCTTATTTTTGCTTTTTTCATCAGGTGCTAAAGCCGCGAATCATT  
ATGACTATCTTCAGTTTGTTCACAATGGCCGATAACCTTGTGCTACAAAATTCAGACTGTATTCCAGGTGCAAGACT  
CCCCTGGGCTTCTTTATCCATGGGTTATGGCCGAGCAATTTCTCTGGCCCGAATCAGCCTTGTGTTGGTACTCCGTTT  
AACTCTAATATGTTAAATCAACATAGTCTCATGGGGAAGCTGGAAGTCTCATGGCGAAGCTTCACTCGTAGACCTAACA  
TGAGCTTCTGGGAGCATGAATACAACCGTCACGGCACTTGTTCGGAGAACAACCTCCCGCAGACGAGATATTTTTCCAA  
AGCCCATCGTCTCTGGGAGAGCTACAAAGCACACCGTATGTTCCGTAAATCTAGAGTCATGGGCCACCGGATCGTGCCG  
GGATACCCCTACCGTTACCGTGACCTTCGAAAGGCCGTTTCGACAAGAAATTTGGCGGAAAAAATCCTTTCGCTTATTTGCA  
AGCACGAGCCTGCAAATAATACTTGGATGCTGCACGAAGTCATCATATGTTTTAATGCCACGCGGTACAACGTCATCGA  
TTGTGTTAGAAGATCTAGTTGCTCCGGCGCTGCCAACGGGTATATACACTATCCTTTCGCGA

>Rxanthina\_29

ATGAAAACGCCAGCAGCAGTCTGTCTTATTTTTCTTGCTTTCTGTTATTCTGCTCAAGGGTTCCACGCAGAGCCATACG  
AGTATCTACAATTTGTTTTACAATACTCCAAAGGCTACTGCTACAACACCCAGATATGTTTTGCGACGTTGCCAAAAAT  
GTTTACCATCCACGGTGTCTGGCCCGCGAACATTTCCAATCCCTGGTGAGATGTAAACAGTCAAAGAACTACACCCG  
TTCAACCAAAACATGACAACATCACTGCAAAACGATCTTGGCCAATCTTGGCCCAATGTCGAAAGAGCTAAAACCAATA  
TAGGGTTTTGGAAGAGGAATACGAAAAGCATGGGTCTTGTACTGCACCAGCTATCACACAGAAAGCGTACTTTGAGAG  
AGCTCACGAGCTGTGGAAGGAGTATGATCTCTATACAATTTTGGATAAAAAGCAGATCAAGCCGGGGCACTCATATGCA  
CTCACTGATTTTGAAGCAGCCGTCAAGTCCAAGATCGGTACC

>Rxanthina\_31

GCAGAGCCATACGAATACCTACAGTTTGTCTTGAATACCCTAGAGGTTACTGTGTTAACGACAAGAAATGCATTCCAC  
CGGCGAGCTTGCCAGCCAAATTCACGGTTCATGGAATTTGGCCACGAATATTTCCGAGCCGATTATCAGCTGTGACAA  
GGCACAGAACTACACTCGTTCAACGGAAACCTGATAACTCCGTGTTGAAAACCGATCTTCTCCAATCTTGGCCCAGC  
GTCCTGACAGATAAAGATGATATGTCGTTTTGGGAACACGAATATAATAAGCATGGGTCCGTACTGCACCAGCTATCA  
CTCAGACAGCGTATTTTGAAGAGCTCACAAGTCTGGAAGGAGTATGATCTCTATTCATTTTGAACAAAAAATAT  
CAAGCCGGGGCAATCTCGATCGTATTCACTGGCTGATTTTGAAGCAGCCGTCAAGTCCAAGATCGGTACC

>Rminutifolia\_4

GTGTTAATCATGGATATGGCATTGCTAAGTACAATAGCCGTGCTGCTTGTCTGCTTTTTTCATCAGGTGCTAAAGCCG  
CTAATAAGTACGACTACTTCCAGTTTGTCCAGCAATGGCCGGCTACATTCTGCTATCAAAATCCGGGTTGTGTTCCGAA  
TCCCCCGCGGAATACTTTTACCATTTCATGGCCTTTGGCCAAGTAATTACACGACACCTGAAAAGCCATGCGTTGGCACA  
CCCTTTAGTCCAGCTGAGATGTTTGTGCGCGAAAACCATGGTTTTGAAAGACTATTTTCTGCCGCGAGCATGGCCCCAGT  
TAATTGCTCGTTTACCAACATGCAATTCGGCGGACCGAATATAACAAGCACGGTACCTGCTCGGAGAACAACCTCAA  
GCAGACGGAGTATTTTGGACAGCTCACTGGGCGTGGGTTCGATTCAATGCATATTTTCTGTTTGCACACTCGCCTCTG  
CAAATCCACCCTGGTAATTACTATCATAAAGCTGACCTTGAACAAGCCATTCGGGCAGTCACTACT

>Rminutifolia\_17

ATGGCTGGAGTAAACAGTGGCAGTCATTGTGCTATTTTTCTTTCACTTGGTGGCGTCCGACAGCCGGGCGGACATCATG  
GCCGACAGCCGGTCCGACATCGGGTCCGACATCAGTATGACCTTCAACTTGTACTGCAATATCCAGAACACGGAACCG  
AGGATCAAATATTCGCGAGCGTTTACCATTTCATGGCCTATGGCTCAGCAGTAAATTCAGCCCTCATACTTATTTGTGGA  
CGACGCCTTGGTGCATTTCAAACCTGCTGACCAAAGTCTCAAACGAACCTCAGTACTCTTGGCCCAATGTTGTTT  
ACGGTGACTCTCGGAATTTGAATTTTTGGACCGACGAATACAATAAGCACGGCAGCTGCGCCGTTTACTGGAAAAATAT  
CAGAACAGTGGAGGAGTACTTTCGAAAAGCAGATGACTTGTATTTGCAAACAAGCAATTTATATAAAGTATTCGGCAAC  
GGCATCCACCCGGGAACAAGTTCGACGTTAGCCACTATAGGAGTCTCGTAAAAACAGAGACTGGGAAAAATTCACGAC  
TGCAGTGCATCGATGGAAGTTTTGGAACCCGACTGCTGGAAGTAGCTATTTGTTACAAAAACAGAGTACTTTATTCAA  
AGTGGTTGATTGCTCAAACCTGGGAATTTGTACGGGGCTCATATCATATCCAACAGAAATAGCCCTT

>Rminutifolia\_21

ATGGGGATCATCTACTCGTCCTGCTTCTCTCTGCGTGGGAGGCAGCTGATGCAACCAAACCCCTACTACTACTTCCAGT  
TTGTGCAGCAATGGCCGGCTGAAATTTGTTTTGCAATCCAGTTTTTTCGCCATGGCCATCCAGTTCGTATCCAACATTT  
CCCAAAGTTTTTTTACAGTGCACGGCCTTTGGCCAACAAAACTCACGGACTGCTCGGACTCCTCCACCGGCTTGTGTT  
GGCACACCATTTGATGAAGCTGAGATGTCCAAAACCGTGACTTGTGAAAGATCTTCGAAAAGCATGGCCCCAATTTGA  
AAGCTCATACTACTAATATGGAGAAAGCTGATGCTGCAAAATATGCACTTCTGGAAAGAAGAGTATAATAAGCACGGAAT  
TTTTCTCGGAGAACAAGCTGGACCAGACGCAATTTTTTTCAGGAAGCTTACCAGGATGTGGTCTCTGTACAGAGCAGATCAG  
CTGTTTTGAAAAATCATCACCAGCAATCTACCCTGGAAGTTCCTATACTCTCACTGCCCTTAAAAATGCCATTTGGGAAG  
GGACTGGGGGCCGGCCTCTTCTTAGCTGCAGGCCAGGAAGAGAAAAGTAGGTGCCAAATATGAAAATGTTTGGTTTTT

GGAGGAGGTCATCATTGTTTTGATTATCTGAGACAGAACGTCATCGATTGTGTTGACGGACAAATTGCGGTGTAACA  
ATATATTATCGTCGTTAC

>Rminutifolia\_23

TCTATTTCTAGTACTTGCCTGGCGGAGGGATTAATTTCCCTAACAATTATGATATCAACGACTGCCCTAACACTCCCC  
CTCCAATCATCACGGTACACGGTCTATGGCCATCGAACTATAATGGACCTCGCTTGAAGTGCTCTGGCGGTATGAGTCA  
CCAAACATTACTAAAAGCAAACCTGGAACAACATTCCCTGGCCGGATGTGGAAAAAGGAAACCATATGGGTTTTCTGGAAG  
CATGAGTGGGCGGAGTGGCAGGCTCATGGACAGTGTTCGGACACCGTCTTTCCAGTTCCACATACAAAATATTTCAAT  
GGTGTACGATATGTGGAACAAAAACGTGATAGGCGAGATCCTTGAAGGTCGCCCATCATCCCAAGACCCAAAACGTA  
TAGCCTGTACGCCATAGAAAATGCCATCAGAGCAAACACTTCGCATCACCCCTTATATTCGCTGTGCCCAAACCTCAAAG  
TTCGAAGAT

>Rminutifolia\_27

TGGCCAGGCTCATACTGTGCAGCAGCAAAGCAGGGTTGTTGCTACCCAAAGAGTATTAGAAAACATCCCAGTTTCACAA  
TTGGTGGCATATGGCCTTATACTTTTTCTGGGGATAGACCAACCTACTGCAAACTAAGACCCCTTTTAGTTTATCCAA  
GAGTTTGGAAAGGAACTGGCCATCACTATCCTGCCCAAGCCGTACTAGTAGCAGTAAGAACTATGGATGCAAGAAATGG  
CAGAAAATATGGACTTGTGCAGAACTACTCTTTGGAGGTCAATACCAATACTTTTCATGCAGGTCTCAATCTGAGGAAGA  
AAATAGACATGCTCCAGATACTCAGCAATGCAGGTCTGATCACTACTATAATCCAACCTTTCGGATTTTCAGCTCAAATAA  
ATTAGTGGAACTCAAACCTTTTCGCTTAATA

>Rminutifolia\_34

ATGTCTCTAGGTTTATATGATCATTTTAAATTTGTACAACAATGGCCACCGGCCGTCTGTGACACGTCTGGCTGCAACA  
GATCGGGGTTATCACGCTTACAGATCCATGGCCTTTGGCCAAATAATAAACGATGTGAAAAATCAACCGACTTGTCT  
TACCAATCAGGCCAACTCATTTAAGGCTAAGATACTCACTAGTTCGAATTTGGTAAGCAAGCTGAGCACCTCTTGGCCC  
GATGTGAAAAATGCAATGATAAATTTTTTTGGAAAGAAACAATGGGACAAGCATGGCACATGTTCTTGCAGACATACG  
ACCAAGCACAATACTTCGAGCGGTCATACAACATGTGGAAAGAAACCAACCTGACAAACACCTTGGATAGCCTCATCAA  
ACAGACACCGAGACAACAGAACGTCACAGATATAGAACAACCTATTCAAGGAGTAACTGCAACTGAAAAGAAAACCCCTC  
CTCCGTTGTGAACAATCTCATAGTAATGCCAGTAAATCTCTCTTGAAGAGATTGTCAATTTGCTATGCACACAACGGGA  
TTACTGTGATCGATTGCGTCAGTCAACCAAAATCCACCTTCGAATGCTATGACGGATTTTGGTTTCT

>Rminutifolia\_35

ATGGCTGCGACAGTGTCTTCTGTTGTTCTTACTTCCATTTGCTGCTGAGGGTCTAATCACAAATTCGAGCCAGGGGCAGT  
ACCGCTCCAGTTTGTAGCTACCACAAGGGTTGGAAGAGCATTCCCGGGCAGGCCGTGGGATGGCCGGCGTACCAATACCT  
GCAGTTTGTACTACAAAATCCTAATTTCTTTGGATCCAAAAACACCAGTGCAGAGCTATTTTACCATACATGGCCTTTGG  
CCTTCCAATATCAGCAATAGTCATCCCCATGCTGTTGTTTCCGTTGAAAACGTAGTTACAGTCTCGCAGTCTCATG  
AGTATTGGTTGGATAACATCCTCGATCATATTTGGCCAGATGCTCATAATCCCTTTTCAAAGGAAATGCAGCTGCACAA  
CAATGAGCGTTTTTTGGGAAAACGAATACAACAAGCACGGCAGTTGCACCTGCACAAAATCGAAATTTCTTGACACCGAAG  
GATTACTTTAAAAAAGCTGTTGAATTTGTGGAACAAGCTTAATATTCGTTACTTTTCTCACATACAACCGGGAAAGCAGAG  
TCCCATATCGTGACTATTTACGGCTCGTCAAACAAGCGCTTGATAAACACCAAAACAGTAAATCCAATACTGTATTGCCA  
CCCAATGAACAGACAACGTGAACAACAACCTCAAGGAAGTAGTTATTTGTCTGGATAAAAAATGCGAGTATGCTGAAGAAT  
TGTACC CGCCTCAGAGGGCCATTGTGCAAGAGTTGGGGGAAGATATACTCGAGC

>Rminutifolia\_38

AGATTCACCATTCTATGGGCTATGGCCTACGAGCAAATACAATACTGCGATTACATATTGTAATACTCGAAATTATGCAG  
CTGCTGATCTTCGCAAACAGCTGCGGCCAACCAGTCTCCAGATGAACTCCTTCAGTCTTGGCCCAATGTAGTGACTCC  
AAACAATCCGAATGCAGTTTGGTCTTCTGGAAATACCAATACAACAAGCACGGCAGCTGCGCCTACTGGAGATTCCAA  
AGACTGGAGGCTTACTTTAGAAAAGCAGATGACTTGTATCGCAGTGATAACGTACAACATTTGTATGATTCAATCACC  
GCAATCGCCAAGTCTCTGCTATCAGATATATGAATGACGTAAAAAATTATGGAGGGAAATTTCCAGGACTGCGGTGCAA  
TGGAACGGGATTCTGATAGAAGTATTCTGTTACACAAAAAAGCAACTAAAATGATTGATTGCCCTAAACGGGGG  
AATTGTACGAGGCTAATTGAATATCCAATG

>Rarvensis\_2

GTGGGGCAGCCGTATTACCAGTACCTGCAGTTTGTAGTACAAAATCCTAATCTTTGGATCCATGCTCACCAGTACGGA  
GCTATTTTACCATACATGGCCTTTGGCCTTACAATATCAGCAATAATAAACACCATGATGTTGTTTCCATTGAAAACG  
TAGTTACTGTCTCCAGACCTCATCAGTATTGGCTGCCTACGAATTTGGAAAACAGCCTCGATATAGTTTGGCCGGAT  
GCTCATAGTGTTCGACCCAATCATCAGCGTTTTTCGGGAAAACGAATACAAAAAACACGGCAGCTGCACAAACCGAATTT  
TCCCAGACCAGGAGGATTACTTTGAAAAGCTCTTCACTGGTATGATCTGATAATCGAAAGACTGTTAGATCATCATCA  
TCGTAACCTATATCCCAACATCCAACATCTGGTATCCCAACCAGGAAACCGAGTCCGCACCTGGTCTGCTTTTAAATGAC  
GTCAGACAAGCGATTAAAGACGAGCGAAGGATTACAGCCGAGCCACTACTGTTGTGCAACGGAGGGAAAGGCCAACCCAC  
AACAACCTCAAGGAAATAGTTATTTGTCTCAATCAACATGCAACTGAAGCGACTGATTGTACCAAAGAAGAGGGTTGTG  
TAGGGGGGGAATATACTTACGCT

>Rarvensis\_4

ATGAAAATGATTCCTTTTCTTGTCTCCTACTTTTCTTATTCCTTATTCCTTCAACTGTAAGGGCCGAAATGAAATATTATGACG  
GTCAAACGCTTGTGTTACAAAATTCAGATGAGTTATGGACCATTACGGCCTTTGGCCTACCGACTTACTGGAAAAGA

ACCTAAATTTCTACTATCAGCCAGTTACCGATTGTTTACCATTAAAAAATTTAATTTAAATGAGGTAATTGGCAACGAA  
CGAGGGACACTCGCTAGGGTTTGGCCTAGTAACAATCCGAATACGAGGATGTCCTATAAATTTCTGGCAGTATGAATATG  
AAAAACACGGTTCATGTACCGCAGATATATTACCAAGCTGTAGAGATTATTTAATGAAAGCAGTTACACTGTGGAATAT  
ACTCCAGTTAGACAATTTGCTGGGTCCATAAAGGCAAGTATAAGCCAAACACTTTATTTCAAGCCCAGGACTTGCTGTAC  
GACATGGAAGTGGAGTATAAGGTCCGACCTCTGTTGAAGTGTAAATAATCAGGGGGAACACTACTGGAATTTGGTTTTGTT  
ATACAGAAGTATGGAAAAGCATATTTTGGCCAGCCCACGACAGACTCTTGTACGGGTTCATATTAATATGTTAGGGCA

>Rarvensis\_10

GTCCCACGGATGATTAATACGAAAGCAAAGAATCTCGTTTCACTCTTACGGCCTTTGGCCCTTCAACGCTACACAAT  
TAGATCCAAACAATATTAATTTCTGATTTCCAGTATAGACCTATCATAGAGTGTGCCAGTTACCTACTGTCTTACTGTA  
TAAACTTGCAAATCTTGGAAAAGTTATATGCGTAGCTATCCGAATGGGGATTTTTGGAAAGATGAATACGACAAGCAT  
GGAACATGCACCGTTGAAAAATTTTCGTACACCTGCCGAGTACTTCCAGAAGGCAAATGACTTGTGGGAAGCCAACCCAA  
TAGAGGATTGGTTTTCGGCGTGATGGTTCGCTTACAGATACAGATGTCCAGCTCGCTGAGCTGAGAGGCGCGATCATGAA  
CAAGTTCGGTTCGTGCCATGGTTTTAGTGTGAGGACAAAATTTGTGCGGCAGATAGGCTTATGTTTTGATGAGGTTGGA  
GGGCTGGGTGCGAATTGTCTTAAAGAATATCAAAGAAGCAATGTCCCCCTACTGTACAGTATAGATTG

>Rarvensis\_19

TGTCTTATTTTCTTGCTTTCTGTTATTCTGCTCAAGGGTTCCCACGCAGAGCCATACGAGTATCTACAATTTGTTTTGC  
AATACTCCAAAGGCTACTGCTACAACACCCCGATATGTTTTGCGAGGTTGCCAAAAATGTTTTACCATACACGGTGTCTG  
GCCCCGGAACATTTCCAATCCCTGGTGAGATGTAAACAGTCAAAGAAATTACACCAGTTCAAGCAAACGTGATGACA  
ACATCACTGCAAACGATCTTGGCCAATCTTGGCCCAATGTCGAAAGAGCTAAAACCAATATAGGGTTTTGGAAAAGAGG  
AATACGAAAAGCATGGGTCTTGTACTGCACCAGCTATCACACGAAAGCGTACTTTGAGAGAGCTCACGAGCTGTGGAA  
GGAGTATGATCTCTATACAATTTGGATAAAAAGCAGATCAAGCCGGGGCACTCATATGCACTCACTGATTTTGAAGCA  
GCCGTCAAGTCCAAGATCGGTACCRATACAATACCTCTCATCCTGTGCAAAGAGGACACACTAATACTACTGGGAGCAGCA  
CAACTGGATTAATTTCTGAGGGAAATAGTTATCTGTTTCGATCACCAGGGAACAAAATCTGGTCAATTGTACCCGCGCCAG  
AGATTGCAAGCGGCAGAAGAGCACAACTAAGGACAACATGATATACTACGTACCT

>Rarvensis\_25

ATGGCATTGCTAAGTACAATAGCCGTGCTGCTTGTCTTTTTTCATCAGGTGCTAAAGCCGCCAATAAGTACGACT  
ACTTCCAGTTTGTCCAGCAATGGCCGGCTACATTCTGCTATCAAAATTCGGCTTGTGTCCGGAATCCCCCGCGGAATAC  
TTTTACCATCCACGGCCTCTGGCCAAGTAATTACACGGCACCTGAAAAGCCATGCGTTGGCACACCCTTTAGTCCAGCT  
GAGATGTTTGTGCCCAAACCATGGTTTTGAAAGACTATTTCTGCCGCAAGCATGGCCCCAGTTAATTGCTCGTTTCA  
CCGACATGCAATTTCTGGCAGACCGAATATAACAAGCACGGTACGTGCTCGGAGAACAACACTCAAGCTGACGGAGTATTT  
TAGAACAGTTCCTGGGCGTGGGTTTCGATTCAATGCATATTTCTGTTTGCACACTCGCCTCTCAAATCCACCCTGGT  
AATTACTATTTTAAAGCTGACCTTGAACAAGCCATTCGGGCAGTCACTACTAAGGACCCCTCTGCTT

>Rarvensis\_33

ATGAAGTCGATTTTGATTTTCAATTTGTCACAATTTGTATCAGTTTTCACTTCTCCTATCAGCGCCAAATCCACCTCAAG  
CCCCACCTCCTGATTCCTTCTTTGGTCATTGTGTGGCCCAATACCTTCTGTCTTTTGGAGTCATGTCAGCTGCATCC  
ACAATCTTTTACACTACATGGATTGTGGCCACAGGCGAATGGGAAATCCTTGGTGGACTGTGCTGGTTTCAAGAAATGGAT  
GATAGCACCTTAAATGGCAAGAAAGATGATTTGAACAAGTATTGGCCAGACTTGACGCATTTCAAAGTTTGAAGAGAGTA  
AAAGCTTTTGGATACATGAGTGGGAAAACATGGTTCGTTGCTCTGCAAAGAGTCTGCTAATTACTTGAGCCTGGTGT  
TGATCTGATGAAAAACATGATGTGGAACAGATATTTAAAAACAATGGAATTTTACCAAGCAAGAACGGGTATCCGATG  
ACACAGTTGGGACAGGCAATATTTGATGACACTAAATTTGTGGACAAGGATTAATGCCAATCGAACGACGGACACCAGT  
TTCTATTTCAAATATATTTCTGCTTAAACAGCTCAAGGCCAATTCAGGAATTTGTTCTAAAAGCGGTGCGGACTATACAGG  
GTGTACCAAAGGCTGCCAGTCACTTCCCCTTACCTTCGCCGGTCTCATAGTAAAAAGCAAGAAG

>Rarvensis\_39

CTTTGGTCTTTCAGTCCGACGTCATCATATAACAATACCTATTGTTTTGTTCAACGGTGGCCAAAGTCTGTTTGTATGATA  
TCAACTGCCCTAACACTCCCCCTCAAACATCACGGTACACGGTCTATGGCCATCGAACTATAATGGACCTCGCTTGAA  
GTGCTCTGGCGTTGTGACATTTAGTGAAACACTGGTAACACATTATTATATGAGTCACCAAACATTACTAAAAGCAATC  
TTGGAACAACATTCCTGGCCGGATGTGAAAAGGGAAACCATATGGGTGTCTGGAAGCGTGAGTGGCAGGCTCATGGAC  
AGTGTTCAGACGCCGCTTTCCACATACCAAATATTTCAAATGGTGTACGATATGTGGAAGAAAACGTTGATAGGCGA  
GATCCTTGAAAGG

>Rmajalis\_1

TTGCTGCTCTTCACTCTTCCCTCAGTATATTCTCAGAATGTGGAGCACTCGAGATTGGCTCTAACCAATCCAAAGGCTT  
ATTGCTCATTAAGGGCTTGTGTTGCACCTATCCCACAGTCTTTTACTCTTACAGACTATGGCATCATAATTTTGTCAA  
GATTGGTGGAAATAACCCCTTGGCGTCAATTCATCTAAGAGGTGTTTTCAACACAAGATCTTCTCAACTATTGGCCAGAC  
CTCTCTAGAGATCGAGCAATTTGGAAGCATGAATGGGAATCCCACGGCGCACATATA

>Rmajalis\_11

ATGAGTATTTTTACATTGTTTCTCCCCCAAACCTCCACAGGCGGATACTATGAATATTTCAAGATGGTGGAAACAGTGGC  
CGTTAGGATATTGCACAGGTCGACCAGATCCTTGCAACAAAACCTCCACCAAACATGTTACCATCCATGGTTTTTGGCC  
CAGTAATTTATTCAAACAATCCAGCAGATACATGCAAAGGGACTTCGTTCAACGAGACTATGATGCGTAAAAATCAAACA



TTGGTATCCGCACTACAGAGAGTATGGCCAGACCTGGCGGACGGAGATGATTTTGGGTTCTGGAGACGTCAGTGGGACA  
AACATGGGAAATGTTTCGGAGCAAACATTTTCAGCAAATGCAATATTTTCGAGCGTGCAAATGTTATTTGGAACAAACCGAA  
TATGACTTTGATCTTTAAAAATAATGGAATCCTAGCAGGGGGGGCAAATATAACTCCACAGACTTGGTATCACGCATT  
GAAAAGGTGCTTCGGACCACGCCCTACTTTCATTGCAAATGGGTAACGGATCCTAAT

>Rmajalis\_20

TTTTTTTTTTTTCAACACAATAATGTCTCTAGGTTTCATATGATCATTTTTAAATTTGTACAACAATGGCCACCGGCCGTCT  
GTGACACGTCCTGGCTGCAACAGATCGGGGTTATCACGCTTCACGATCCATGGCCTTTGGCCAAATAATAAAACGTATGT  
GAAAAATCAACCGACTTGTCTTACCAATCAGACCAACTCATTTAAGGCTGCGATACTACTAATTCGAATTTGGTAAGC  
AAGCTGAGCACCTCTTGGCCTGATGTGAAAAATGCAAATGATAAATTTTTTTTGGAAAGAAACAATGGGACAAGCATGGCA  
CATGTTCTTGCAGACATACGACCAAGCACAATACTTCGAGCGGTCATACAACATGTGGAAAGAAACCAACCTGACAAA  
CACCTTGGATAGCCTTATCAAACAGACACCGAGACAACAGAACGTCACAGATATAGAACAACCTCATTCAAGGAGTAAC  
GCAACTGAAAAGAAACCCCTCCTCCGTTGTGAACAATCTCATAGTAATGCCAGTAAGTCTCTCTTGGAAAGAGATTGTCA  
TTTTGCTATGCACACAACGGGATTACTGTGATCGATTGCGTCAGTCAACCAAAAATCCACCTTCGAATGCTATGACGGATT  
TTGGTTTCCT

>MDP0000267606AT2Lineage

ATGATTCTCTCTGCTCAATTCGCCTCTGCAGTAGCACTGATTGCGGTGGGCGCTTCTCTGTGCCTGATCGATGCCAAGC  
AAGCCGGAATCGGATTCGAAATCGGAAGCAGAGGAGGAGGGCAGAGGGAGTTTCGATTACTTCAACTTGGCCCTGCA  
ATGGCCTGGCACTTTCTGTTCAGCGCACCCGCCATTGTTGCTCCTCCAATGCTTGTGCGCGGCTCAAATGCTCCAACC  
ATGTTTACAATCCATGGATTGTGGCCTGACTACAATGATGGAACCTGGCCTGCCTGTTGCACACGGAAAACCTTTGATG  
ATAAGGAGATCTCAACATTGCACGATGCTTTAGAGAAAATACTGGCCATCTTTAAGCTGTGGTAAACCATCATCTGCCA  
TGGTGGAAAAGGATCATTTTTGGGGTTCATGAGAAGCACACTTGCTCCTCTCCAGTAGTTGGAGATGAATACAATTACTTT  
TTGACAAATGTCTATTTTAAAGTACAATGTCACTCAAATCCTGAATGAAGCAGGATATGTACCATCCAATACTGAAAAAT  
ATCCTCTTGGAGGCATTGTTTCTGCTATTGAGAATGCTTTCCGGGCAACCCCGAGGTTGGTTTGCAAAAAAGGGGCCCT  
GGAGGAACCTCATCTATGCTTCTACAAGGATTTCCAGCCTCGGGATTGTCTGGTTGGATCTGGCAGTCTAAGTGACAAG  
TTAGCTTCAAGTAGCTCATGTCCAGTTTTGTGTCAGCATAACCAGCATATGCATCATTGGATTTCCTGCAGCTCAACTCTTA  
ACCTGCAGAATGTCAATCTGCCC

>M\_domestica\_MDP0000160706\_Malus\_S\_RNase\_lineage\_2

ATGGAGTCGAAGTTAGTGCAAGTCATATTTTTCTTCTTGTGTTGTCACAGTTTCATCCGCTTACACACCATTCCAATACT  
TTATGCATGTTTCAGTTCTGGCCAGCTGCTGAATGCCAAGCTACAGGGGGGAATAAATGCCACATCATGCAACCATCTCA  
TCTTCAGTTCACTATTCATGGTCTCTGGCCTGCGAATAAATCATCCTCTTCATCCCTTGGCTGCAAGGGGGATGCCTAT  
AATGTGAATGGGATGAATGATACACTGAAAAAGGAGCTACTCAGTTTCGTGGTGGGATTTGGAGAAAAGGGGAGCATGTGCG  
AATTCTGGCAACGAGAGTATGATAAGCACGGAAAGTGTCCGACAATGTGTTTCTGAAGACCGAGTACTTCCGGGAAGAC  
CCTAGCGATGTACCATGATTTTATAGCTCAAATCCTGCAGAAGGCTAATATTGTACCCCACTACTTTCAGCCCAAG  
ACGTCGTTGTACAAATTTGACTCCATCGATCAGATAACAAAGGCCATTGAGTCCAAAACCGGCGGACATTCCGTCATA  
TCAGATGCTATCAACAAAACCAGAAGAAGAGCAACAATGGAAGTAAACCATTAATATATTTGGCCCAAGTCGCCCTCTG  
CTATAATAGATCTGGCAATAGCAGAATACTGTGATCCAGGCGAAACAACCAGCTGCAACTTTAATGAATCAGAACC  
AAAACGTACCAAGAATAGCCACATAAAGCTCTGG

>M\_domestica\_MDP0000250548A\_S\_RNase\_lineage\_1

ATGCACTTCTTCAAGATTGCTCTCCTTGTCTCCTCACTCTTACTTTCATCACCTCTCTCGAAAGATCAATGCTGCCACAC  
CATATGACATCTTCCAGTTCGTCCAGCAATCCCCATTGGCCTTCTGCTACGGAACCGATATCTGCGGAGACCAACCAGT  
ACTGCCCGTACCTTTACGACGCACGGCCTCTGGCCAAGCAGCAGCACCATCCAGCTGCTCCTTTAACCTGCGCTGGT  
ACCGCATTCAGCCGTAGTGAGATGAATGATCCCGACAATCAATATCTGCAACTACTTTTGTCTTATTCCTGGCCCACT  
TCAACATTAGACAAACAAATATGGATTTCTGGGAGTATGAGTACAACAAGCACGGCAGGTGCTCGGACAATACATTTTC  
CCAGACACAATACTTCCGTGAAGCTTATAGATTGTGGTCTACCTACAATGCACTCCATCTATTTTCTCAAACAACCTGG  
ATTGTACCAGGCTATCCATATCGTTATATCGACCTTGAATTTGGCCATTGACCGGACTATAGGAGGGAAAGCACCTCTTC  
TTATGTGCAAGTATAACGGGGTGAGCCCGTATCTGGTGAAGTTCGTCATCTGCTTTGACTACACTGCAGCGAATCCGGT  
CGATTGTGTCAGGACAACAATTTGTGGAATCCTAATGCATTTGGGCAAATTTTCATCTAATATATGGTGGAAATAGGCAG

>M\_domestica\_S2\_RNase\_MDP0000345854

ATGGGGACTACGCGGATGGTATATATAGTTACGATGTTATTTTTCATTAATTGTATTAATATTGTCTTTCGTCTACGGTGG  
GATACGATTATTTTCAATTTACGCGAGCAATATCAGCCGGCTGCCTGCAACTCTAATCCTACTCCTTGTAAAGATCCTCC  
TGACAAGTTGTTTACGGTTACGGTTTGTGGCCTTCAAACATGAATCGAAGTGAATTTAATTGCAAGTATTCAAAC  
GTGACTTATGCGAAGATACAAAATATCCGAACCCAGTTGGAATGATTTGGCCAAACGTATTCAATCGAAAAAATCATT  
TAGGCTTCTGGAATAGAGAGTGAACAACACGGCGCCTGTGGGTATCCACAATACGGAACGACTTGCATTACTTTCA  
AACAGTAATCAAATGTACATAACCCAGAAACAAACGTCCTGATATCCTCTCAAAGGCCAAGATTGAACCGGATGGA  
AATATCAGGACACAGAAGGAAATTTGTAGATGCCATAAGAAAAGGTATCCATGGTAAGGAACCAAAAACCTCAAGTGCCAAA  
AGAATACTCAGATGACTGAATTTGGTTGAGGTCCTTTGCGAGGATGGCAACTTAAAGCAGTTTCATAGATTGCCCCCA  
CCATTTTCAAATGGATCACGACATAACTGCCCCACCAATCATATTCTG

>M\_domestica\_S3\_RNase\_MDP0000266136

ATGGGGATTACAGGGATGATATATATGGTTACAATGGTATTTTCATTAATTGTATTAATATTGTCTTCGTCCGCGGTGA  
AATTGCGATTATTTTCAATTTACGCGAGCAATATCAGCCGGCTGTCTGCAGCTCTAATCCTACTCCTTGTAAGGATCCTCC  
TGACAAGTTGTTTACGGTTTCATGTTTTGTGGCCTTCAAATGTTAATGGAAGTGACCCCAAGAAATGCAAACTACAATC  
TTGAACCTCAAACGATAACAAATCTTACAGCCCAGCTGGAAATTTATTTGGCCAAACGTACTCAATCGAAAGGCTCATG  
CACGCTTCTGGCGTAAACAGTGCGCTAAACATGGCACCTGTGGGTACCCACAATAGCGGACGACATGCATTACTTTAG  
CACAGTAATCGAAATGTACATAACCAAGAAACAAATGTCTCTGAAATCCTCTCAAAGGCGAAAATTAACCCGGAGAAG  
AAATTCAGGACACGGGACGACATTGTGAATGCCATAAGCCAAAGTATCGACTATAAGAAACCAAACTCAAGTGCAAGA  
ACAATAATCAGATAACTGAATTGGTTGAGGTGCGTCTTTGCAGCGATAACAACCTTAACGCAGTTCATAGATTGCCCCG  
CCCATTTCCACAAGGATCACCATTTTTCTGCCCCACCAATAATATTCAGTAT

>P\_persica\_ppa024151m\_S\_RNase\_lineage\_1

ATGTTGTTTCTGTTTCTTGCTTTCTTTTTATGTCAACAACATTTCCATGTGACTGCAATGCTCCTGGACAGTATGACTACT  
TCCAGTTTGTTCAGGAGTCTCCTTTTCTATTTTGCAAAAATATTAATGGAAGGGATGCAACATCCTACCTCTGCCACG  
GATATTTACTATTCATGGCTTGTGGCCAAGCAACTTCACACATCGTCATAAACCTTGCGTTGGTGCACAATTTAGTAGA  
GATATAAATGAAGCCTCCAATGATGAATTGCGAGCTGATCTGGAGTTGTCATGGCGAAGCTTCATCAGTGGGCGGTCAA  
ATATGGACTTCTGGGAATATGAATACAACAAACACGGCAAAGTGCTCCGACGACAAGTTTTTCGCAGACGCAATACTTTCGA  
CCGTGCCAGGAGTTTGTGGAAGCAATACAAACCTCATGCTCTATTTTCTAATCGCTCGCTTGAACCAGGCAAGTCATAT  
AGTTTTACTGGCCTTGAACAAGCCATCCGATCATTTATAGGCCGGGAGCAGACCTCTTCTCCTTTGCGAGCAATCTAAGA  
GGAAGAAGAACAAGAAGAAGACAAAA

>P\_persica\_S2\_RNase\_ppa018459m

ATGGGGATGTTGAAATCGTCACTCGCTTTCCTTGTTCTTGGTTTTGCTTCTTCTTTTGTACGTTATGAGCAGCGGAT  
CTTATGACTATTTTCAATTTGTGCAACAATGGCCACCGACTAACTGCAGAGTTCGCGTCAAGCGACCTTGCTCCAATCC  
CCGGCCATTACAATATTTACCATCCATGGCCTATGGCCAAGCAATTATTCAAAACCCAAAGATGCCAGTAATTCACACA  
GGGTTCGCAATTTAAGAAACAGAAATTTGTACCCTTATATGCAATCCAACTGAAGATATCCTTGCCCGGACGTGGAAAGTG  
GGAATGATACAAAATTTGGGAAGGCCAATGGAATAAACATGGTACATGTTCCGAACGAACACTTAACCTAATGCAATA  
CTTCCAGCGATCCCACGCAATGTGGAAATCACACAATATTACAGAGATCCTTAAAAACGCTTCAATCGTACCACATCCG  
ACAAAAACATGGAAGTACTCGGACATAGAATCACCCATTTAAAGAGCAACTAAAAAGAACACCCGTCCTTTCGTTGCAAAC  
GTGATCCAGTACAGGCGAATACTCAGTTGTTACATGAAGTGGTATTTTGTATGAATATGATGCGCTAAAGCTGATTGA  
CTGTAATCGAACAGATTGCTGGAATAACGTTGACATTAAGTTTCAA

>P\_persica\_ppa011133m\_Prunus\_PA1

ATGCCATTAAGATATGAGATATTTGGCAGGGCTTCTCTGCAAGCTATTACCCTCATGGGCAACCGTATGACTACCTAC  
AATATGTACTACAATGGCAGAAGACGAAATGCTTGAAGGTCGGGAAACCGGTGCACTCCATATGAGAAGTTCCTACTCA  
CGGCCTCTGGCCAACCAACCTCTCCAAGATATTGACATGCAATCAGCTTCAAATTTAGCAGCACTATGCTGCAAAAT  
AATGCTTCATTGCTATCGAAGATGAAAAAGTCTGGCCAAATCTGGAGCAGAGAGTTGCCCAAGGAAAAGACAACGATA  
TGTGGTTTTGGGCGATGGAGTACGAAAAACACGGTATATGTGCCAAGTTTTCTAGCCAGAATACTTACTTTGTCAAAGC  
ATGTGATTTGTGGGAAAGAAAACAAGATTAAGGAGATTTTGTAGCACCACAAAATCTTTCCAACAAACGCGACGTCATAT  
AAAGATGTTTTGCTTATGAATGCTATTGAAATGGAACCTCGCAGTCTCCTCTCCTTCTTTGCCATAGAGTCAACGGCG  
ATTATTTGTTGTGGGAGGTTGTCTTTGCTATGACGACACGGCTAAAAAACGGATGAATGTTCTGATCAAAGTGAAG  
ACAAACAAATTGCGGAACCGACATCTATTATAAA

>P\_mume\_S\_RNase\_scaffold241\_33

ATGGGGATGCTGAAATCGTCACTCGCTTTCCTTGTTCTTGCTTTTGCCTTCTTCTTCTTCTTCTTCTATTCATCACAATAATTTTG  
CAGGATCTTACGACTATTTTCAATTTGTGCAACAATGGCCACCGACCACTGCAGAGTTCGCATCAAGCGACCTTGCTC  
CAACCCCGGCCATTACAATATTTACCATCCATGGCTTATGGCCAGTAATTAATCAAACCCAACGGTGCACAGTAAT  
TGTAATGGGTCAAATTTGACGCAAGGAAAGTGTCACTCACTACGAAACAACTGACGAAATCTTGGCCGGACGTGG  
AAAGTGCAATGATACAAAATTTGGGAAGGCCAATGGAACAAACATGGTACGTGTCCGAGCAGACACTTACCAAAT  
GCAGTATTTCGAGATATCCCACGACATGTGGCTGTCCACAATATAACACATATCCTTAAAAACGCTACAATCGTACCA  
AGTGCCACACAAACGTGGAAGTACTCGGACATAGTAACCCCATTAAAAATAGCAACTAAAAAGAACACCCCTCTTTCGTT  
GCAAACCTGATCCAGCACAAAATAAGAGCGGACCGAAGACTCAGTTGTTACATGAAGTGGTACTTTGTTATGGATATAA  
TACAAAAAAGCAGATTGACTGTAATCGAACAGCAGGATGCTGGAATAATGTTGACATCAAGTTTCAA

>P\_mume\_scaffold442\_35\_S\_RNase\_lineage\_1

ATGGTACTTGACCACCAATTGGCTCGGCTTTTCACTCCGCTTTCACATGCTGCAATGCCGCTGGACAGTATGACTACTTTTC  
AGTTTGTTCAGGAGTCTCCTTTGTATTTTGCAAAAATTAATCTGGAAGGGATGCAACATCCTACCTCTGCCACGGAT  
ATTTACCATTCATGGCTTGTGGCCAAGCAACTTCAAACATCTGCATAAACCTTGCCTTGGTGCACAATTTAGTAGAGAT  
ATGAATGAAGCCTCCAATGATGAATTGCGAGCTGATCTGGAGTTGTCATGGCGAAGCTTTCATCAGTGGGCGGTCAAATA  
TGGACTTCTGGGAATATGAATACAACAAACACGGCAAGTGCTCCGACCACATATTTTCGCAGACGCAATACTTCGACCG  
TGCCAGGAGTTTGTGGAAGCAATACAAAGCTCATACTCTATTTTCTAATCGCTCGGTTGAACCAGGCAAGTCATATCGT  
TTTACTGACCTTGAACAAGCCATCCGATCATTTATAGGCCGGGAGAAGACCTTCTCCTTTGCGATGCAATCTGAGTGGGA  
AGAAGAAGACAAAACAATATTTGCTGGAAGTGCATATTTGCTTTGATGACATAGCAATTAATCCAGTGAATTGTCCCAA  
GAGGATGTCAAAGAATGTCTTCCACAATCCCCTGTATGGTATATGCTA

>M\_domestica\_SH\_RNase\_AB032247

ATGGGGACCGGGATGATATATATGGTTATGATGGTATTTTCACTAATTTTATTAATATATGCCTTCGTCCACGGTGGGAT  
TCGATTATTATCAATTTACGCAGCAATATCAGCCGGCTGTCTGCAACTCTAATCCAACCTCCTTGTAAGGATCCTACTGA  
CAAGTTGTTTACTGTTTACGGTTTGTGGCCTTCAAACCTCGAATGGAAATGACCCAAAATATTGCAACGCACAGCAATAT  
CAGACGATGAAAATACTCGAACCCAGTTGGTAATTATTTGGCCGAACGTACTCAATCGAAACGATCATGAAGGCTTCT  
GGCGTAAACAGTGGGAGAAACATGGCTCCTGTGCGTCTTCCCAATACAGAACCAGAAGCATTACTTTGATACAGTAAT  
CAAATGTACACAACCCAGAAACAAAACATCTCTGAAATCCTCTCAAAGGCGAATATAAAACCGGGTAGGAAAAACAGG  
ACACTGGTGGATATTGAAAATGCCATACGTAATGTTATCAACAATATGACACCACAATTCAGTGCCAAAAGAATACTA  
GGACATCATTGACTGAATTGGTTGAGGTCGGTCTTTGCAGCGATAGCAACTTAACGCAGTTCATAAATTGCCCCGCC  
ATTTCCACGAGGATCACGGTATTTCTGCCCCACCAATATTCAGTAT

>P\_pyriifolia\_S9\_RNase\_AB104909

ATGGGGATTACAGGGATGATATATATGGTTACAATGGTATTTTCATTAATTGTATTAATATATCGTCTTCGCCCGTGATGA  
AATTCGATTATTTTCAATTTACGCAGCAATATCAGCCGGCTGTCTGCAGCTCTAATCCTACTCCTTGTAAGGATCCTCC  
TGACAAGTTGTTTACGGTTTATGGTTTGTGGCCCTCAAATGTTAATGGAAGTGACCCCAAGAAATGCAAACTACAATT  
TTGAACCTCAAACGATAACAAAATCTTACAACCCAGCTGGAAACTATTTGGCCAAACGTACTCAATCGAAGGGCAAATG  
TGCGCTTCTGGCGTAAACAGTGGCGTAAACATGGCACCTGTGGGTACCCACAATAGCGGACGACATGCATTACTTTAG  
CACAGTAATCGAAATGTACATAACCAAGAAACAAAACGTCTCTGAAATCCTCTCAAAGGCGAAAATTAACCCGGAGAAG  
AAATTCAGGAAACGGGACGACATTGTAATGCCATAAGCCAAAGTATCGACTACAAGAAACAAAACCTCAAGTGCAAGA  
ACAATAATCAGATAACTGAATTGGTGGAGGTCGGTCTTTGCAGCGATAACAACCTTAACGCAGTTCATAGATTGCCCCG  
CCCATTTCCACAAGGATCACCATTTTCTGCCCCACCAATAATATTCAGTAT

>P\_pyriifolia\_S4\_RNase\_AB009385

ATGGGAATTACGGGGATGACATATATGTTTACAATGGTATTTGTCATTAATTGTATTAATATTTCTCTGCGTCCACGGTGG  
GATTCGATTATTTTCAATTTACGCAGCAATATCAGCCGGCCGTATGCAACTCTAATCCTACTCCTTGTAACGATCCTAC  
TGACAAGTTGTTTACGGTTTACGGTTTGTGGCCTTCAAACAGGAATGGACCTGACCCAGAAAATGCAAGACTACAACC  
ATGAATTCCTCAGAAGATAGGAAAATGACAGCCCAGTTGGAAATTTATTTGGCCGAACGTCTCAATCGAAGCGATCATG  
TAGGCTTCTGGGAAAGAGAGTGGCTCAAACATGGCACCTGTGGGTATCCCAATAAAGGACGACATGCATTATTTAAA  
AACAGTAATCAAATGTACATAACCCAGAAACAAAACGTCTCTGCAATCCTCTCAAAGGCGACGATTCAACCCGAACGGG  
AATAACAGGTCCTGGTGGATATTGAAAATGCCATACGCAGTGGTAACAACAATACGAAACCAAATTCAGTGCCAAA  
AGAATACTAGGACGACGACTGAATTGGTTGAGGTCACTCTTTGCAGTAATAGAGACTTGACTAAGTTCATAAATTGCC  
CCACGGCCCTCAAAGGATCACGATATTTCTGCCCCGCCAATGTTAAGTAT

>P\_ussuriensis\_S35\_RNaseDQ839240

ATGGGAAATACGGGGATGATATATATGTTTACAATGGTATTTTCATTAATAGTATTAATATTTGTCTTCGTCAACGGTGG  
GATACGATTATTTTCAATTTACGCAGCAATATCAGCCGGCCGTATGCAACTCTAATCCTACTCCTTGTAACGATCGTCC  
TGAAAAATGTTTACGGTTTACGGTTTGTGGCCTTCAAACAAGAAGGGACCTGACCCAGAAAATGCAAGAATATACAA  
ATGAATTCCTCAGAAGATAGGAAAATGGCAGCCCAGTTGGAAATTTATTTGGCCGAATGTGCTCAATCGAACCAGATCATG  
TAGGCTTCTGGGAAAGAGAGTGGCTCAAACATGGCACCTGCGGGTATCCCAATAAAGGACGACATGCATTACTTAAA  
AACAGTAATCAAATGTACATAACCCAGAAACAAAACGTCTCTGCAATCCTCTCGAAGGCGATGATTCAACCCGAACGGG  
CAAACAGGTCATTGGTGGATATTGAAAATGCCATACGCAGTGGTACCAACAATACGAAACCAAATTCAGTGCCAAA  
AGAATACTAGGACGACGACTGAATTAGTTGAGGTCACTCTTTGCAGTGATAGAGACTTAACGAAGTTCATAAATTGCC  
CCAACCACAACAAGGATCACGATATCTCTGCCCCGCCGATGTTTCAAGTAT

>P\_avium\_S3\_RNase\_AJ298312

ATGGCTATGTTGAAATCGTCACTCTCTTTTCTTGTCTTGGTTTTGCTTTCTTCTTGTGTTTCAATTATCAGCGCTGGTG  
ATGGATCTTATGTCTATTTTCAATTTGTGCAACAATGGCCACCGACTAATGCAGAGTTCAGAAGAAATGCTCTAAACC  
CCGGCCATTACAAAACCTTACCATTATGTCCTATGGCCAAGTAATTTTCAAACCCAAAGATGCCAGTAATTCGAAT  
GGGTCGCGATTTAAGAAAGAGCTATTGTCCCCTCGAATGCAATCCAAACTGAAGATATCTTGGCCGAACGTTGTAAGTA  
GCAACGATACAAAATTTTGGGAAAGTGAATGGAACAAAACATGGTACTTGTCCGAACAGACACTTAACCAAGTGCAATA  
CTTCGAGATATCCACGAAATGTGGAACCTGTTCAATATACAGATATCCTTAAAAACGCTTCAATCGTACCACATCCG  
ACACAAACATGGAAGTACTCGGACATAGTATCAGCCATTGAGAGTAAAACCAAAGAACACCCCTCCTTTCGTTGCAAAA  
CGGATCCAGCACATCCTAACCGGAATACTCAGTTGTTACATGAAGTGGTATTTTGTATGGATATAATGCAATAAAGCA  
GATTGATTGTAATCGAACAGCAGGATGCAAAAATCAAGTTAACATCTTGTTTCCA

>P\_dulcis\_SM\_RNase\_DQ099895

ATGGGGATGTTGAAATCGTCACTCGCTTTTCTTGTCTTGGTTTTGCTTTCTTCTTTTGTACGTTATGAGCAGCGGAT  
CTTATGACTATTTTCAATTTGTGCAACAATGGCCACCGACTAATGCAGAGTTCGCGTCAAGCGACCTTGCTCCAATCC  
CCGGCCATTACAATATTTACCACCCATGGCCTATGGCCAAGCAATTTATCAAACCCAAAGATGCCAGTAATTCGACA  
GGGTCGCAATTTAAGAAACAGAATTTGTACCCTTATATGCAATCCAAACTGAAGATATCTTGGCCGGACGTGGAAAGTG  
GGAATGATACAAAATTTTGGGAAAGGCGAATGGAATAAACAATGGTACATGTTCCGAACGAACACTTAACCTAATGCAATA  
CTTCCAGCGATCCACGCAATGTGGAAATCACACAATATTACAGAGATCCTTAAAAACGCTTCAATCGTACCACATCCG  
ACAAAACATGGAAGTACTCGGACATAGAATCACCCATTTAAAAGAGCAACTAAAAGAACACCCGTCCTTCGTTGCAAAC

GGGATCCATCACATCCTAACAACTCTCAGTTGTTACATGAAGTGGTATTTTGTATGATTATAAGGCCAAAAAGCAGAT  
TGATTGTAATCGAACAGCAGGATGCTGGAATAATGTTGACATCAAGTTTGAA

>P\_avium\_S1\_RNase\_AB028153

ATGGCGATGTTGAAATCGTCACTCGCTTTCCTTGTTCCTTGGCTTTTGTCTTCTTCTTTGTTACGTTATGAGCAGTGGAT  
CTTATGACTACTTTCAATTTGTGCAACAATGGCCACCGACCAACTGCAGAGTTCGCATCAAGCGACCTTGCTCCAAACC  
CCGGCCATTACAAAATTTACCATCCATGGCCTATGGCCAAGTAATTATTCAAATCCAACGAAGCCAGTAATTGCAAC  
GGGTCAAAAATATGAGGACAGGAAAGTGTACCCTAAATTGCGATCCAAACTGAAGAGATCTTGGCCCCGACGTGGAAAGTG  
GCAATGATACAAGATTTTGGGAAGGCGAATGGAACAAACATGGCAGATGTTCCGAACAGACACTTAACCAAATGCAATA  
CTTCGAGATATCTCACGACATGTGGGTGTCTACAATATTACAGAGATCCTTAAAAACGCTTCAATCGTACCACATCCG  
ACACAAAAATGGAGCTACTCCGACATAGTATCACCCATTAACAGCAACTAAAAGAACACCCCTCCTTCGTTGCAAAA  
CTGATCCAGCAACTAATACTGAGTTGTTACATGAAGTGGTATTTTGTATGAATATCATGCGTTAAAACAGATTGACTG  
TAATCGAACAGCAGGATGCAAAAATCCACAAGCCATCTCGTTTCAA

>P\_avium\_S5\_RNase\_AJ298314

ATGGCGATGTTGAAATCGTCACTCGCTTACTTGTTCCTTGGCTTTTGTCTTCTTCTTTGTTATGTTATGAGCAGTGGAT  
CTTATGACTATTTTCAATTTGTGCAACAATGGCCACCGACCAACTGCAGAGTTCGAACGAAATGCTCCAACCCCCGGCC  
ATTACAATATTTACCATCCATGGCCTATGGCCAAGTAATTATTCAAACCCAAAGATGCCAGTAATTGCATTGGGTGCG  
CAATTTAACGAAAGTAAAGTGTATCCCCGATTGAGATCCAAATTGAGGATATCGTGGCCGGACGTGGAAAGTGGCAATG  
ATACAAAGTTTTGGGGAGACGAATGGAACAAACATGGTACATGTTCCCAACGGATCCTTAACCAATTCCAATACTTTGA  
GCGATCCCAGCAAATGTGGAGATCTTACAATATTACAAATATCCTTAAAAAAGCTCAAATCGTACCAAATGCGACACAA  
ACGTGGAGCTACTCGGACATAGTATCACCCATTAAGACAGCAACTAACAGAACACCTCTCCTTCGTTGCAAAATCTCAGC  
CTAAGAGCCAAGCGAATTTTTCAGTTGTTACATGAAGTGGTACTTTGTTTTGATTATAATGCGCTAGTACATATTGACTG  
TAATCGAACAGCAGGATGCTGGAATAACGTTGACATTAAGTTTCAA

>P\_dulcis\_S7\_RNase\_AY291118

ATGGGGATGTTGAAATCGTCACTCGCTTTCCTTGTTCCTTGGTTTTGCTTTCTTCTTTTGTACGTTATGAGCAGTGGAT  
CTTATGACTATTTTCAATTTGTGCAACAATGGCCACCGACCAACTGCAGAGTTCGCATGAAGCGACCTTGCTCCAATCC  
CCGGCCATTACAATATTTACAATCCATGGCCTATGGCCAAGTAATTTTCAAACCCAAACGAAGCCAGTAATTGCAAT  
GGGACTAAATTTGATGCAAGGAAAGTGTATCCTGAAATGCGATCCGATCTGAAGATATCTTGGCCAGACGTGGAAAGTG  
GCAATGATACAATAATTTTGGGAAGACGAATGGAACAAACACGGTACATGTTCTGAACAGACACTTAATCAATTCCAGTA  
CTTTGAGCGATCCCACGAAATGTGGATGTCTACAATATTACAGAGATCCTTAAAAACGCTTCAATCGTACCACATCCG  
GCAAAAACATGGACCTATTCGGACATAGTATCACCCATCAAAGCAGCAACTGGAAGAACACCGCTTCTTCGTTGCAAAAT  
ACGATAACAACACTCAGTTGTTACATGAAGTGGTATTTTGTATGGCTATAAAGCAATAAAGCAGATTGACTGTAATCG  
GCCAGGATGCAAAAATAAAATTGACATCAAGTTTCAA

>P\_bretschneideri\_S34\_RNase\_DQ414813

ATGGGGATGACGGGGATGATATATATGGTTACGATGGTATTTTCATTAAGTATTAGTATTGTGTTTCTCTACGGTGG  
GATACGATTATTTTCAATTTACGCAGCAATATCAGCCGGCTGTCTGCAACTCTAGTACTACTCCTTGTAAGGATCCTGC  
TGACAAGCTGTTTACGGTTCACGGTTTGTGGCCCTCAAACCTGGAATGGATCCCACCCAGTAAATTGCACGAATAAAACC  
ATGAATTCCTGACGATGGGAAATCTGACAGCCCAGTTGGAAATTTTGGCCGAATGTACTCAATCGAAACGATCATG  
CAGGCTTCTGGAATAGACAGTGGAAACAACATGGTACCTGTGGAGTCCCCAAAATAAACGACAGCTTGCAATACTTTTCG  
AACAGTAATCAAATGTACATAACTCAGAAACAACACGCTCTGAAATCCTCGCAAAGGCGAATATTAAACCCGGAGGGG  
AAAAACAGGACACTGGTGGATATTTAAAAGCCATACGCAGTGGTACAACAATAAGGCACCAAAACTCAAGTGCCAAA  
AGAAATCTTCGATGACTGAATTTGGTTGAGGTGAGTCTTTGCAGCGATCACAACATAACGCAGTTCATAAATTGCCCCCG  
CCCATTCACACAAGGATCACACATTTTGGCCAAACAATAGTATTGAGTAT

>P\_avium\_PA1\_AB096918\_Prunus\_PA1

ATGTTAAAACACTACTCCTTCTTGTGCTCTTTTTCAGCGCGTCTCTGCAAGCTATCACCACTCATGGGCAACCGTATGACT  
ATCTACAATATGTACTACAATGGCCGAACACGAAATGCGTGAAGGCACGGTGCATTCAGGGATTCAAAAAACTGAGTT  
CACTACTCACGGCCTCTGGCCAACCAACCTCTCCAAGATATTGACATGCAATTCAGCTTCAAATTTAGCAGCACTATG  
CTGCAAAATGATGCTACATTTGGTATCGAAATTGAAAACCTTCTTGGCCAAATCTGGAGCAGAGATTGCCCAAGGAAAAG  
ACAATGATATGTGGTTTTTGGGCGATGGAGTACGAAAAACACGGCACATGTGCTAAGTTTTCCAGCCAGAATACTTACTT  
GTCAAAAGCATGTGATTTGTGGGAAGAAAACAAGATTAAGGATATTTTGGCCAAACACAAAATCATTCCAAGAAACGCG  
ACGTATAAAGATGTTTTGTCTACGAATGCTATTCAAATGGAACCTCGCAGTTTCGCCTCTCCTTCTTTGCCATAGAGTCA  
ACGGCGGTGATTTGTTGTGGGAGTTGTACTTTGCTATGACGACACGGCTAAAAACGGATGAATTGTTCTGATCAAAG  
TGCAAGACAAACAATTTGCGGAACGGACATCTATTATAAA

>F\_vesca\_00230\_S\_RNase\_lineage\_1

ATGGAAATGGCATTGCTAGCGGTTTTTCTTATCTCAGCTGCTGCTTGTTCATCAGTCACTGAAGCAGCCAAGGCCTACG  
ACTACTTCCAGTTCGTACAACAATATCCTATTACCTTATGCATGTTTCGACACAAGTTGCATTCAGGACAATCACTGCC  
TCGATACTTCTACATCCACGGCTTATGGCCAGTAACCTTCACTTATCCGCATGACGATTGTGTGGGTACACTGTTTCGAC  
TACAATCAGATGAGCAGTGATCCTACTCTCTCAAACAATTTGCTGCAATCATGGCCAGCTTACAGTCCAAATCCCACA  
TCAAATTTCTGGGCGGATGAGTATCACAAGCACGGGACCTGTTCCGAGATAGACTACCCGCAGCACCGCTATTTTGGCGA

AGCCCATATGCTCTGGACGTTTCGTCAATGCATACCGTATCTTAGCAACATAACAACATCGTTCGCCGGCAGAACCTACCCT  
GCGGTTGACATTATATACTTCGTCCAAGCAGCACTCAAAGGAATCACACCATCTGTATGTGCAAGGCCAATTCTGCGG  
GTCAAGAATATCTCCACGAGATCATCATATGTCTTGACAAAACGCTTACCAGATTCATCAATTGTGTTTCGACCATCCAC  
TTGCCGTACTACAGCGGTAATGTATCCC

>F\_vesca\_00227\_S\_RNase\_lineage\_1

ATGGGGATCATCTACTTGTCTGCTGCTTCTCTCTGCGTGTGGTGCAGATGATGCAGCGAACATCTACGACTACATGC  
AGTTCGTCCAGCAATGGCCGGCGACATTCTGCTATGGTAATCCGAATTGTGTCCCAAATCCACCACACAGTACTTTTAC  
GATTCACGGCCTCTGGCCCAGCAATTACTCGACACCTGAATTTCCATGCGTTGGCACACCCTTTGATCCCTCGCAGATG  
TTCGCTGCCGAAAACCGTGGTTTTGAGGGACTATTTTTCTGCCGCAAGCATGGCCACAGTTGAATGCTCGTTATACCAACT  
TGGAGTTCTGGAAATTCGAGTACGAAAAGCACGGTATGTGCTCGGAGAACTATCTGAATCAGATGGATTATTTTCAGGAA  
AGCTTACTGGGCGTGGGCTCGATTCAATGCTTATGTTCTGTTTGGCGCATCGCCTAAGCAAATCTACCCTGGCAATTAC  
TATTACACAAGAGATATTGAAGCAGCCATTCAGAGAGTGACCAGTGAGAAGCCTCTGCTTATGTGCAAGAAGGTAAGAG  
TAGGTACGGTTGATAGTTGTCTATTGCAGGAGGTCATCATCTGTCTTGATCGTTGGGCAGACAACGTTGTACCTTGTCTG  
CCTTCGACTGTCATCGTGCACAGTCCCAATTATATATTATGGTTAC

>F\_vesca\_26822

ATGCATGAGTGTGTACGTATCTTAATTTTCATATATGGCAATCTCATTTCATATTTGGCAATCTCATTAAATTGATGAAA  
ACACAATCGACTATACAAAGCCGATCATTTCACAAGGAACACCCTTCCAGTACTACCAACTGGTCATGCGATGGCCAAA  
AGCAGCATGCTACCACAAACCTGCTGAGCCAAAGATTTGTGTTATGGATGATGATCATGTTCCGATGAGGTTTACCCTC  
CACGGAATGTGGGCGACGAACTGGACAAATATCAAAGATGAAATTCGGTGTGAAAAGGCTGGAACGCCATTTGATGAAG  
ATGAGATGACTAAACAAAAGACACTGCAAGAACAACCTGGAGCAAAGCTGGCCGACGTTACTGGATAATTATCCAACATA  
TATGGAATTTCTGGAAGCACGAATACGATAAGCATGGCCGATGCAGCCAAGATACAACACTCAGACCGAATACTTCGAA  
AAAGCTCACAAATTTGTGGCAGGAATTCAGGTTGTGTACCAAGCATTGCAGATGACAAGATCATACTGCAGCTGATA  
AGATTCACACCTACAACCAGATCGAGCGAGCAATCGCTAAACGATTCCGGCAGTAGTTGGAAGGTTGTGCTTTTTTGCAG  
AAAGGTGAATCTGACGCCTCGTGGTACCGGTGGAACAAAACGATTCTACTTCTTTTGCATGAAATCGTATTCTGCTTT  
GATAACAAAGCAATGGAAAAGAAGAGTTGCAACAGAAAATCGAACTGCGAGAACCGGAAAACATAACACTGATAAAT

>F\_vesca\_22609

ATGATGAAGAATTCAGTCTTCGTTTTCTTTCTGTGCTAGTCTATGTCCTTGTCCAACCTATCAAGCTTTCAAATGCTGAAC  
CATTTGAGTACATGCAGTTTGTGCTCCAGTACCCACTTGGAGTTTGTATGGTACACAAAAGGTGATTCCAAATCACC  
TCTGCCACCAAGTTTACCGTTTACAGCATCTGGCCGTCAAACCTTCTCCGATACACGAGTCGTTTGTAGGCAAGCACTG  
ATAAGTCACCCCTTTAATAATGCGCAGATGACGTCGTCTCTGCAGACTGATTTGACAACTCATGGCCATCTGTGATAA  
CAAAAAAAGCGACATGCAGTTTTGGCAACATGAGTATGAGGAGCATGGCGCTTGTTCAGTAGACAAGGGTGTACCACT  
GTTTACCCAGAAGTCTTACTCTGAGAGAGGAAACCAGCTCTGGAACCAATATGACATCCATGCAGTCTTGTGATAAAGC  
AATATCAAACCGGATTCTTCAAAGCCATGCAAAATGACTGAGATTGTAGCTGCAATCCAAAAGAAAATCGGGAAAAACA  
CACTCTGTACGAAGGTGCAAGGAAGATAACAAAATTTACATAC

>F\_vesca\_12961

ATGTTGTCATTTCTCATTGTTTTGCTTAGTGTTCAAATGCTGCTAGCAGCAAATCCACCTCCACCTCCACCTCCAGCTG  
TTCCAGCTCTTGATTACATAAAGCTGGTCATTGAATGGCCAAACACTTTTTGTCTTGTGAGCCACAGCCACCATGCCA  
ACAGCATCCACAGTCTTTTACATGTCATGGCCTTTGGCCACAGGCGGGTGGTTCGATCGTTAGTGAATGTCTCTGGTTCA  
CCAATGGAAGATCAAACCTTAGAGGCAAATAAAGGTGATCTGACAAAGTTTTGGCCTGATCTTAGGAACTCGGACTTTG  
ATAAGAGTAAAAGCTTTTGGCGTCAGGAGTGGGACACACACGGTCGCTGTTCTGGCAAGCCTCCGGCCGACTACCTTAC  
CATGGTCTTTAATGCAGTAAAAAAGTATGACGTGCAAAAGTTACTTGCAAAGAATGGAATTTTACCAGGTGATCCGACA  
GGGCATACGGCGGCACAGTTTTGAACAGGCAATATTCAAAGAACTAAACTGCACACAGAGATTGAATGCCGGACGAAGG  
ACTCGAAGGAGTATCTATTTCAAATTTATTTCTGCTTAACACCTCAAGGACAGTTCAAGAATTTGTCGATCCGTTACAG  
GTGTGCAAATCAACAAATCTACATGCCCTTGCCCTCCGCCAGTCCC

>F\_vesca\_scf0513144\_1\_Prunus\_S\_RNase\_lineage

ATGCATGGTATGTTTCTATATATTGTTGACGTCGGTTTGGCGAAGGAAAGGTCTATCTATATAACAAGCATGAGATTG  
TGACTGTGTTATTGTTGTTGTTTCTTGTCTTAGCACTATAATGTCTCGAGGATCTTATGATCATTTCAAATTTGTACA  
ACAATGGCCACCGCCTTCTGTGCCACGAATCGCTGTAAACAGGGGCAAACAGATGTTAATGTTCACTATCCATGGT  
CTCTGGCCAGATAATAAAACTTATGTGCCTTGTGCTGCCCTTTTACCCTTGTGTTGTCAGGCGCTCAGATCCTTAAATGATG  
CGAGCTGGTAAACAAGCTGTGACCTCTCCAAATCTGAAAGGAATTTGATCGCAAGTTTTGGAAAGAAGAATGGGACAA  
ACACGGAAGATGTTTCTCGCAGACGTACGACCAAAGACAATTTTCGAGCGGTACACACAATGTGGATGGAACGGAC  
TTGACCAACACCTTTGGCAACCTTATCAAAGGAAACAGTCTACAACGGAAACGTCGAGATATAGAAAACCTGATTCAA  
AGGTAACCTGCAACGGAAAAAACCCTCCTCCGTTGTAAAAACAAAAGATCCACACCTCACGATGAAGTATTAACCTGA  
AATTATAATTTGCTATGCACACAATGGAAGTGTGCTGATCGATTGTGTCGGTCCATCCACCTGCACGGACGGATTTTAC  
TTTTCT

>F\_vesca\_scf0513063\_1\_Prunus\_PA1\_lineage

ATGGGTTTTGTTTTTTTTCTGGTGGTTGTGCCGCTTACCCTCAAAGCACTTTCCGGTGGTCATCGCCGTCAACATATCA  
ATGCATACGGCGATGATCCCGCTATGATCTGGTGTATTGTTCTTACAAGTCACTAATCCTCGTGACAAGGAGAAATGG

ACCTTACTTAACCATCTTCGGCCTTTGGGCCGAATATCTTCAGAATGGGGCCCCCCTGAGACCGGGTACCTTCAACCG  
TACCTAAGAAAGAGGCTCCATGTAATATGGCCAACCAGAAGAGACGGAAGCTACCCAACAGACCGGGCCTTTTGGCTGC  
ACGAAGTTGATAAACATGGGACCTGTATGGCAGATATATTCGGACGGGGGGAGCAGTACCTACAAAAGGCAAAAAGAAAT  
GTATGAGCAGATCGGGATAGGCCAGTTCCTTGGGTCGTAACGGAAGGTGGCTGCCAAAAATTGAATTC AATACCGCGGAT  
TTACTGGGGCGATCGGTACTGAACGCAGACCACTATTAGAATGTGAAGGAAATCATCTCGTCAGAATTTTATTCTGCT  
ACAGCAAACACTGGGTGATTAACCCCTGCTTGCCACCCACCCCGATCCAGCAAGAGATTGTCCCGATAGGATTTCTTA  
TGTTCTGCCGACGAGCAG

>F\_vesca\_scf0513159\_1\_Prunus\_PA1\_lineage

ATGGAAGCACTTGTGATATTATCATTTTGTCTTCTATCTATTTTTTCTCAACTGAGTGCAGCTAGGAGAACCGTATT  
ACCAATACATACAACTCTCACTTCAAGTCCCAAGTCGAGGGACCCTCAATCTACTTTGGAGTATTTCCCTTTGCACGG  
CTTTTCGGCCGGTAAACACATCTCTATCTAACCCGAATTTGCCTTTGGGTTTTAACCAGGTATACACCTATCGAAAGGTAC  
CTGAGAACTGAACTCAAGTTATGTTGGATGAGTATAGGAGTACCAGGCCAACGCACGATGACGGATGAGCGATTTTGGC  
TATATGAATACAGTAAACATGGGCAATGTACTATTAACGAATATCCGACCCCTCAAGATTACTTCGCCATGGCAGTTAA  
CCTGTGGCATCTCTATCCTGTGGATAAGTGGTTTTAAGAATAATGGATTGCAGCCAAAAAAGATAAACCGCTCCAAGAT  
TTTGTGTGCTGTCATCTCAAAAAGAAATTCGGCGCTATTCCATGGCTAACGTGTTACGACAACGGGAAGAAGCTGAAGGAGG  
TGGGCTTGTGTTTTCTTAAAATCATCCAGTGTGAATGCGAATCCTGCCCTACAAGTTGTCTTATAAGGGCACTAACGTA  
TGATCTAAGATGTAATTATTTGATACAATATGATCTAGGTCCA

>F\_nipponica\_gi561674690\_gi561985884\_gi561957436\_Prunus\_S\_RNase\_lineage

ATGCATGGGATGTTTTCTATATATTGTTGACGTCGGTTTGGCGAAGGAAAGGTCTATCTATATAACAAGCATGAGATTCTG  
TGACTGTGTTATTGTTGTTGTTTCTTGTCTTAGCACTATAATGTCTCGAGGATCTTATGATCATTTCAAATTTGTACA  
ACAATGGCCACCGCCTTCTGTGCCATGAATCGCTGTAGACCAGGGGCAAAACAGATGTTGATGTTCACTATCCATGGT  
CTCTGGCCAGATAATAAAACTTATCTGCCTTGTGCTGCCCTTTCACCGTTGTTTTAACGGGCAGATCCTTGATGCGAGTC  
TGGTAAACAAGCTGTGACCTCTTGGCCAAATCTGAAAGGAATTGATGCCAATTTTTGGGAAGAAGAATGGGACAAACA  
CGGAAGATGTTCTCGCAGACGTACGACCAAGACAATATTTGAGCGGTACACACAACATGTGGATGGAAACGGACTTG  
ACCAACACCTTTGGCAACCTTATCAAAGGAAACAGTCTACAACGGAACGTCAGAGATATAGAAAACCTGATTCAAAAAG  
TAACTGCAACGGAAAAAAAACCACTCCTCCGTTGTAAAAAAAAGCATCCACGCTCACGATGAATTTTTAACTGAAAT  
TATAATTTGCTATGCACACAATGGAAGTGTCTGATCAATTTGTGCCAGTCCATCCAAGTGCACGGACGGATTTTACTTT  
CCT

>F\_nipponica\_gi561805796\_Prunus\_S\_RNase\_lineage

CTCTTTTCCACAGGTTACTACGACTACTTTTCAGTTGGTGCAACAATGGCCACCCAACGTCTGCTTTAAAAGAAAAGTCAC  
CTTGCTACAATAACACGCCATCACTAATCTTTGGTATTCATGGCCTATGGCCAAGTAATAACAGTGAATAAAAACCC  
CAGTTGCCACCGAACCCATTTAAACCGCAGGTATATATGATCTTTTGCAGGGTAAGCATGTTAAATAATCAAACGCTG  
CTAGCGGACCTTAGCCGTTCTTGGCCCGACGTGGTAAATGGGGACGATCCAACGTTTTGGGCCAAGGAGTGGGACAAAC  
ATGGCAGATGTTTACAGCCAGACATTCGGGCAAAAACGATACTTCCAGCGATCCACGAGATTTGGGAACAATATAATAT  
TACGGATATCTTTAAAAAAGCTGGCTTGATATCGATGACGGGGCCAGCAGTACCAAGACGATGCAACGTCGCAACATA  
CTAACACGCATTGAAGCGGTGACTGGGAAGAAACCTGTCTTTATTGTCAATGGAAATCGATATACCAGCCGCAGCCGC  
AAGGACAACCACCAAGAGGCTAACCATTGATTGATTCAGGAAGTGAAGCTTTGTTTGTATTATGGAACGACATT  
AACTGATTGTACCAATATCAATACACTATGCAAAGGACGTAATGTCTGGTTT

>F\_nipponica\_gi561877040\_S\_RNase\_lineage\_1

ATGGGGATCATCCAACCTACTGTCTGCTTCTCTCTGCTGTGCTGATGCGGCGAACCTCTACGATTACA  
TGCAGTTTCGTCCAGCAATGGCCGGCGACATTTTGCTATGCTAACCCGGATTGTATCCCAAATCCACCGCACAGTACTTT  
TACGATTCACGGCCTTTGGCCTAGCAATTACTCGACTTTTGAAGGGAAATGCGTTGGCACACCCTTTGATCCATCGCCG  
GTATTGCATTATTGCATGCATGGAATATTATATCACTTCTATTCAATTTAGTCTTTCAATTTTTCAGAATCTTTCTGCCGC  
TAGCATGGCCTCAGTTGGACGCTCATTATACCGACATGGAGTTCTGGAATAACGAGTACAACAAGCACGGTACGTGCTC  
GGAGAACTATCTGAATCAGATGGATTATTTCAAGAAAGCTCACTGGGCGTGGGTTTCGTTCAATGCTTATAATCTGTTT  
GCAGCCTCGCCTATGCAAATCTACCCTGGTAATTACTACTATACAAGAGATATTGAAGCAGCCATTGTGAGAGTGACCA  
ATGTGAAGCCTCTGCTTATGTGCAAGAAGGTGAGAGTGGGTAAGGTTGATAGTTGGCTATTGCAGGAGGTCATCATCTG  
TCTTGATCGTTGGGCAGACAACGTTGTACCTTGTGGCCCTCGATGGTCATCGTGCAACGTTCCAATTATATATATATGTT  
AAC

>F\_nipponica\_gi561793890

ATGCATGAGTGTGTACGTATCTTAATTTTCATATATGGCAATCTCATTATTGATGAAAACACAATCGACTATACAAAGC  
CGATCATTTTACAAGGAACACCCCTCCAGTACTACCAACTGGTCATGCGATGGCCAAAAGCAGCATGCTACCACAAACC  
TGCTGAGCCAAAGATTTGTGTTATGGATGATGATCATGTTCCGATGAGGTTACCCCTCCACGGAATGTGGGCGACGAAC  
TGGACAAAATGTCAAAGATGAAATTCAGTGTGATAAGGCTGGAACGCCATTTGATGAAGATGAGATGACTAAACAAAAGA  
CACCCGAAGAACAACCTGCAGCAAAGCTGGCCGACGTTACTGGATAATTATCCAACATAATGAAGTTTTGGGAGCACGA  
GTATGATAAACATGGACGATGCAGCCAAGATACAACCACTCAGACCGAATACTTCGAAAAAGCTCACAAATTTGTGGCAG  
GAATTGCAGGTTGTGTACCAAGCATTGCAGATGACAAGATCATACCTGCAGCTGATAAGACTCACACCTACAACCAGA  
TCGAGCAAGCAATCGCAAAACGATTCGGCAGTAGTTGGAAGGTTGTGATTTTTTTGCAGAAAGGTGAATCTGACGTCCTG

TGGTACCGGTGGAAAAAACGATTCTACTTCTTTTGCATGAAATCGTATTCTGCTTTGATAACAAAGCAATGGACAAG  
AAGAGTTGCAACAGAAAATCG  
>F\_nipponica\_gi561844698  
ATGATGAAGAATTCAGTCTTGGTTATCTTTCTGTCTAGTATATGTCCTTGTCCAACCTATCAAGCTTTCAAATGCTGAAC  
CATTGAGTACATGCAGTTTGTGCTCCAGTACCCCTTGGAGTTTGTATGGTACACAAAAGGTGATTGCAAATCACC  
TCTGCTACCAAGTTTTCCGTTACGGCATCTGGCCGTCAAACCTTCTCCGATACACGAGTCGTTTGTAGGCAAGCACTG  
ATAAGTCACCCCTTTGATAATGCGCAGACGACGTCGTCTCTGAAGACTGATTTGACAACTGGCCATCTGTGATAACAA  
AAAATAGCGACATGCAGTTTTGGCAACATGAGTATGAGGAGCATGGCGCTTGTTCAGTAGACAAGGGTGTACCACCGTT  
CACCCAGAAGTCCTACTTTGAGAGAGGAAACCAGCTCTGGAACATGCAATATGACATCCATGCCTGCTTGTATCAAAGC  
AACATCAAACCAGATTCTTCAAAGCCA  
>Rrugosa14\_32  
ATGAGTCAAGATCCAACATTGGTATCCGAACCTACAGAGATCGTGGCCAGACGCTGGGAGGTGGAGATGATATGGGGTTTT  
GGGGACGTCAGTGAATAAACATGGGACATGTTCCGAACAGACATTTGGGCAAATTCATATTTTTCAGCGAGCAGACGC  
CATTGGAACAAAGCGAAAATGAATATTACTATGATCCTTAAAAACAATAAAATCTCAGCAGGGGGGGGAAAATATAAT  
TACACGCATATAGAAGGAGTCATCAAACGGGCAATCGGTGACACACCCATCATTTCGTTGCATATGGAGAAAAGAGGGCTC  
AGTTGTTGCATGAAGTGGTTACTTGTGGTCCCAAGACGGTCAAATTTGATCAAATGTAACCTCTACGCAAAAAATGCAG  
TTCGAATTTTGATATCGAATTTTTA  
>Rrugosa14\_33  
CTGCGGCGAACCAGATCTCCAGATGAACTCCTTTCAGTCTTGGCCCAATGTAGTGACTCCAAACAATCCGAATGCAGTTT  
GGTCTTCTGGAAATACCAATACAACAAGCACGGCAGCTGCGCCTACTGGAGATTCCAAAGACTGGAGGCTTACTTTAG  
AAAAGCAGATGACTTGTATCGCAGTGATAACGTACAACATTTGTATGATTCATTCACCAGCAATCGCCAAGTCTCTGCT  
ATCAGATATATGAATGACGAAAAAATTATGGAGGGAAATTTCCAGGACTGCGGTGCAATGGAACGGGATTCTTGATGG  
AAGTGAGTATCTGTTACACAAAAAAGCAACTAAAATGATTGATTGCCCTAAACGGGGGAATTGTACGAGGCTAATTGA  
ATATCCAATG  
>Rrugosa14\_34  
ATGTCCGCGAACTATCATCTTCAAACCATATTGCTCCCATCCTCGTGGAGAAGCTACCCTATCGGTGTCTCCAACACAG  
ACTTCTGGGAGAATGAGTATAACAAACATGGCACATGTTCCGGAGCTCAATTTGCCACAGACGGAATACTTCAACAAAAC  
CCATTGGCTATGGATGGTCAACAACATTTATAGTATTTTTTCATCTTCGGCCAACAGACAAGGATATCTAATCTTGCCG  
GGTTTACCTATGACTACATCAATCTTCTTCCGCTTGTTCAACTAGGAATCGGTGGCTTCACTCCCCTGCTTACTTGCA  
AGGTCATAAATAAAAACCAATACGTTCTTACGAAGTGGTTATTTGTTATGATGCCTTGGGGATCAACCGCATCCATTG  
TGTGCGACAATCGAGTTGCTCTTTCGCTCCTAACGGACGTGTGCTCTATCCT  
>Rrugosa14\_36\_Rrugosa19\_35  
ATCTCAGAGTTGATGGGCAGTCTGGAAAAGAGTTGGCCATCTATGAGCTGCCCAAGCAGTAATGGTTACAGGTTCTGGT  
CACACGAATGGGAGAAGCATGGCACCTGCTCCGAATCTGAACTTGATCAGAAAGATTACTTCCAAGCCGGTCTCAAGCT  
CAAGGAAAAGCAAACCTTCTTCAAGCCCTTAAAAAAGCTGGTAATTTAGTTTCGTTTATACTCAATTGTTTATAAGAA  
TTAACCAAGCTAGAT  
>Rrugosa19\_14  
ATGGATCGCTCATTGGTATCTAAACTGAATATATCGTGGCCGAATGTGAAATATCCGAATAATATCCAGTTTTGGGATA  
AACAGTGGAGAAAACATGGCTCATGTTCCGTGCACACGTTAACCAAACAGAGTACTTCACGCAAGCGGATAATCTTTG  
GAACTCACACAACATTACTGATATTTATAACTGGTGGGATCAAGCCAAATGGATCAGAATATGCATACGATACGGTA  
GGGCGGCCCATCAAATTGCAACCGGGAAGGTACCCGAACTTCGTTGCGCACCATCTCCCCTGGAAGGCAATGTTGC  
ATGAAGTAGTACTTTGTTATAATCATAAGGGAACAACGCCATCGACTGTAACCTTTACAGGCAACCTGCGATCGTAA  
GTCCCTAATAAAGTTTACTCAG  
>Rrugosa19\_22  
AAAATCGTACCAGCAGCTGACAAAACCTTACACCTACACCCAGCTCGAGCAAGCTATTGGAAAACGATTTGGCAGTAATT  
GGAAGGTTGTCATTCTTTGCAGAAAGGTGAATCTCTCACCTGGTGGTCGTGGACAAAACAAATTCTATTTCTTTTGCA  
TGAAATCGTATTCTGTTTCTATAACAAAGCAACGGAGAAGAAGAGTTGCAACAGAAAAACAAATTGTGAGAACGCGAAA  
ACTATAACCTTCATAAAT  
>Rrugosa19\_50  
CTGAGCCACC\_AACTCCAACGGATCTCAGTACGTCTTGGCCGATGTACTGAACGGAATCAATTCGCGGTTTTGGACCC  
ACGAATACAATAAGCACGGCAACTGCGCCAACCATACATTACAACGCCGAGGCTTACTTTAAGAAAGCAGATTACTT  
GTATCGCAGCTTCCGCTGGCGGACAAAATTTGAATGGTTTATTTCGTCGCGGGCGGCATCCGCCCGGGACAGCAAAGCGAC  
ACTATGATATATATGAATCTCGTAAAAAATGCGACTGGAGAGTTTCCCCGACTGTGGTGCAGTGGAATAGACTGAAAG  
AAGTAGTTATTTGTTACAATAAAGATGCAACTCAAGTGATTGATTGTCCTCCACTCGTAAGGCCGAATAATTGTACGGG  
GCGCATATTAATATCAACAAGAAGACCCCTTATGGTCTAACCATAAAGACCCCTTATGGTTCAACCATATTGGTATTG  
TCCTTTAGTTTACCCTTGGGGCTAATTATCTTTAAATATGGTCCAAGCTATATTAATCTAAGCTAGCT  
>Rodorata\_gigantea\_7

TTCGATGAAGCATTAAACCATCTAGAAAGCAATTGGAAGAGTTATGGAAGCGGGTCGAAAAAAGTTTTGGGATC  
ATGAGTACAATAAACATGGAACCTGCACCATCCTTAAAATCATAATCCTCGCGCTTTTTTCAAAAAAAAAAAAAAAAA  
GTTATGGTCAGACACTAACGTGCACCCAGTGCTTGATGGATCGGTTTTACCAAATGTTCTGAGCTCCTTTGATGATGTG  
ATGTCCACCATCGAGAGGGGATTTGGA AAAAGGCCAACTGCGTTTTATGTTAAAGAATATGCCCGGACAGACCTGCAACA  
AGTGCCTTTATGTTACGACCTCC

>Rodorata\_gigantea\_10

ATGTATACAAATCAAACATTGGTAAATGACTTGACTCGCTCTTGGCCGGACCTGAAAAATGGGAACAATGGAAGTTTT  
GGAAAGAGCAGTGGGATAAACATGGCAAATGCTCAGAACAGACATATACACAAACACAATACTTCCAGCGCTCCTTCCA  
GATGTGGAACCAATTCGATATTACTAGTATCTTAACTGCCGCTGGCGTCGTATCTCCGCCAGGGACACAACCAAGTAAA

>Rodorata\_gigantea\_13

TTGCAGTTTTGGACCGATGAATACAATAAGCACGGCAGCTGTGCACAGCCTAAACTCCGAACACCGGAGGCTTTCTTTA  
GAAAAGCGGTTGACTTGTATCGCAGTAATGACATACAAGATTTAAAGAATTTATTTCGCCGGCATTTCGCAATAGCATCCC  
CCACGGACAGCGATTCCACGTGGGTCTTTGCAGCAATTATATGCAAACCGTAGAAAAGTGCATAGCAGGGAAACAGCCA  
CGACTGTGGTGAAGAAAAACCAACAGGGACACATACTGAAGGAACTCAAGGAAGTAGTTATTTGTTACGATGGACTTG  
CAGCTGTTGTGATTCTTGTCTCGAGGCATAGGGCCGAATTTGTTATCAGAAGTTCATACATTATCCAATA

>Rodorata\_gigantea\_14

GATTTTTGAAGCAGCCGTCAAAGTCCAAGATCGGTACCGACACAAAACCTCTCATCCTTTGTAAGCAGGACAAACTAACTC  
GTGGGATCACAACAACCAACTTCATTTTGAGGGAAATTTGTGATCTGTTTTCGATCACCAGGGGACAAATCTGGTCAATTA  
TATTGTACCCGATCAACAGATTGTGACCAGAAGCAGAAGATATACTACCCTTAGC

>Rodorata07\_8\_Rodorata\_gigantea\_23

TACTCGGCTTGTGTTTTGGTTTTTCAGATAACTCCGTCGTTGAAAACCGATCTTCTCCAATCTTGGCCCAGCGTCGTGACAA  
ATAAAGATGATATGTCGTTTTGGGAACACGAATATAATAAGCATGGGTCTGTACTGCACCAGCTATCACTCAGACAGC  
GTATTTTGAGAGAGCTCACAAGTTCTGGAAGGAGTATGATCTCTATTCATTTTTGGAACAAAAAATATCAAGCCGGGG  
CAATCTCGATCGTATTCACTGGCTGATTTTGAAGCAGCCGTCAAAGTCCAAGATCGGTACC

>Rodorata07\_9\_Rodorata\_gigantea\_17

TCTTGGCCCAATTTAGTGGCTCCAAACAATCCGAATGCAGTTTGGTCTTCTGGAAAATACCAATACAACAAGCACGGCA  
GCTGCGCTACTGGAGATTCCATAGACTGGAGGATTACTTTAGAAAAGCAGATGACTTGTATCGCGGTGATAGCGTACA  
ACATTTGTATGATTCATTCACCAGCAATCACCAGTCTCTGCTATCAGATATAGGAATGACGTAAAAAATTATGGAGGG  
AAATTTCCAGGACTACGGTGAATGGAACGGGATTCTGATGGAAGTAGTTATCTGTTACACAAAAAACAACATAAA  
TGATTGATTGCCCTAAACGGGGGAATTTGTACGAGGCTAATGAATATCCAATG

>Rodorata07\_25

ATGTCCGCGAACTACCGTCTTCAAACCATATTGCTCCCATCCTCGTGGAGAAGCTACCTTATCGCTGTCTCCAACACAA  
ACTTCTGGCAGACTGAGTATAACAAACATGGTACATGTTCCGAGCTCAATTTGCCACAGACGGAATACTTCAACAAAAC  
CCATTGGCTATGGATGGTCAACAACATTTATAGTATATTTTCGTCCTCGGTAACAGACAAGGATATCCAATCTTGCCG  
GGTTTACCTATGACTACGCCGATCTTCTTGCCGCAGTTCAACTAGGAATCGGTGGCGTCACTCCCGTGCTTACTTGCA  
TGGTCATAAATAACAACCAATACGTTCTTACGAAGTGGTTATTTGTTATGATGCCTTGGGGATCAACCGCATCCATTG  
TGTGCGACAATCGAGTTGCTCTTTCGTCCTAACGGACGTGTGCTCTATCCT

>Rodorata07\_27

ATTAGTCAAAAATTACAAAGGCACTCGATAAAGCTTGGTTCGAGTCTTTCGGCTACGTGGCCAAACGTTAAATTTGGG  
AACATGAATATAACAACACGGTTCATGTATCGTAGATTTATTACCAACTTCTACGGATTACCTAATGAAAGCACTTTA  
CCTGTGGGAGCAACTCAAGTTTGACGAGGTGATGGGTAAGGGTAAGCAATTTGAGCCAAATACACTATAAAAACCGAG  
GATATCTTAAGGGCATCAAAGTTTACATAATGTTTCGACCAGAATTGACCTGTATCGGTAATAAATAACAGATGTTA  
GGTTTTGTCATAACAAGAAATTGGGTATTGGTAGATTGCGAGGGCATCAAACATCTTGTACAGGTCAAATTAATATGT  
TAGGCAAGTG

>Rmoschata08\_3

AAGGAGTATGATCTCTATTCTGTTTTGGAACAAAAAATCAAGCCGGGGCCGCTCTCGATGGTATTCACTGGCTGATT  
TTCAAGCAGCCGTCAGTCCAAGATTGGTACCGACAAAATACCTCTCATCCTGTGCAAGGAGACCGCATTAACTCGTGG  
GAGCCGAACAACCTGAATTAATCTGAGGGAAATAGTTATCTGTTTCGATCACCAGGGGACA

>Rmoschata08\_10

ATGGATCGCTCATTGGTATCTAAACTGAATATATCGTGGCCGAATGTGAAATATCCGAATAATATCCAGTTTTGGGATA  
AACAGTGGAGAAAACATGGCTCATGTTCCGTGCACACGTTTAAACAAACAAAGTACTTACGCAAGCGGATAATCTTTG  
GAACTCACACAACATTACTGATATTCTTATAACTGGTGGGATCAAGCCAAATGGATCAGAATATGCATACGATACGGTA  
GAGCGGCCCATCCAAATTGCAACCGGGAAGGTACCCGAACCTCGTTGCGCACCATCCTCCCTTGGAAAGGCAATTGTTGC  
ATGAAGTAGTACTTTGTTATAATCATAAGGGAACAACGCCCATCGACTGTAACCCTTTACAGGCAACCTGCGATCCTAA  
CTTCTAATAAAGTTTATT

>Rmoschata08\_23

ATGCGTCGACACAAACATCTCGAAACTCAATTGCTGTATCCTCATGGCCAAGCTACACTGGTCTGTCCAACCTGCAC  
TTTTGGGAGTACGAGTATAACAAGCACGGCACTTGTTCAGAGAATAACCTCAAACAGACGGACTATTTCAACACAGCCGA



CGCTTTGTGGAGGAGCTACAATGTTACCAATATGCTTTTAAACATCGCGCCACCAAATCTCGCCGGGATCCTCCTATCGT  
TACGCTGACATTCTCAATGCCATTCGACAAGGAATTGGGGGATACACTCCTTTGATTCTTTGCAAGAAATATCGGGCAA  
AAAATAATTTGATGATTCTGCACGAGGTGATAATTTGTTTCGATCCCTTGGGGAATAACGTCATCGCTTGTGGCAGAAG  
ATCGAGACATAGTTGCTCTTACACTAACAGCGGGTTGATAGACTATCCTAAG

>Rmoschata08\_24

ATAATCGACTATTTGGAAACAGATTGGCCGTCGCTGGCCTGCCCGAGCCGCAACAGTACGCAGCTTTGGGCCGAAGAAT  
GGAAACACATGGCACTTGGCTCACAGTCTGTCCTTCATCAGTACAAGTACTTCGCGAACGGTTTCGACCCTCAAAGCCTC  
GGTAGACATCCTCAAATGCTACAACCTTGGTGGTACCTATTTTTTCATCTTTACCTCCCTCGTCATTTATATTATTCTGA  
TTCATGCATTTGAAAAATAAGTTATCATCAATACTATTCCAACCTTGCAGGAATCCAAGCGCGCAGATGGGAAAGTTTAA  
CT

>Rmoschata08\_26

GACAAACTTTGGAAATGCGCACAACTTACTGATATCCTTCGATCTGCTGGCATAAGTTGGAAATGGGTTCGCCAAGGAATT  
ACATAAACATAGAAGGCCCATTCAAAACAAAACCTGGAAAGGTACCCCTCCTTCGTTGCAGGGAGCCACTAAGTGAAG  
GCATAAACCTCGATATCAGCGGACTCAATTATTACATGAAGTGTCTTTTTGTTACAATTATGATGGAATAACTCCGATC  
GACTGTAACCGCGCACAGAGCACGTGCAATTCGACAAGACCAGTAACGTTTACTGAA

>Rmoschata17\_6

AGTTTGGAAAGGAACTGGCCATCACTATCCTGCGCAAGCCGTACTAGTAGCAGTAAGAACTATGGATGCAAGAATGGC  
AGAAATATGGGACTTGTGCAGAACTACTCTTTGGAGGTCAATACCAATACTTTTCATGCAGGTCTCAATCTGAGGAAGAA  
AATAGACATGCTCCAGATACTCAGCAATGCAGGTCTGATCACTACTATAATCCAACCTTTCGGATTTTCAGCTCAAATAAA  
TTAGTGGAACTCAAACCTTTTCGCTTAATA

>Rmoschata17\_12

CAGGCTGTCTACCAAGCATTGCGGATGAAAAATCGTACCAGCAGCTGACAAAACCTTACACCTACACCCAGCTCGAGC  
AAGCTATTGGAAAACCTATTTGGCAGTAATTGGAAGGTTGTCACTCTTTGCAGAAAGGTGAATCTCTCACCTGGTGGTTCG  
TGGACCAAAAAAATTCTACTTCTTTGCATCAAATCGTATTCTGTTTCGATAACAAAGCAACGGACAAGAAGAGTTGC  
AACAGAAAAACAATTTGTGAGAACGCGAAAACCTATAACCTTCATAAAT

>Rmoschata17\_23\_Rmoschata08\_36

CTGCGGCGAACC<sup>~</sup>GATCTCCAGATGAACTCCTTCAGTCTTGGCCCAATGTAGTGACTCCAAACAATCCGAATGCAGTTT  
GGTCTTCTGGAATAACCAATACAACAAGCACGGCAGCTGCGCCTACTGGAGATTCCAAAGACTGGAGGCTTACTTTAG  
AAAAGCAGATGACTTGTATCGCAGTGATAACGTACAACATTTGTATGATTCAATCACCAGCAATCGCCTAGTCTCTGCT  
ATCAGATATATGAATGACGTAATAAATTTGGAGGGAAATTTCCAGGACTGCGGTGCAATGGAACGGGATTCTTGATAG  
AAGTGATTATCTGTTACACAAAAAAGCAACTAAAATGATTGATTGCCCTAAACGGGGGAATTGTACGAGGCTAATTGA  
ATATCCAATG

>Rmoschata17\_24

GGATATCTAATCTTGC<sup>~</sup>GGGTTTACCTATGACTACACCGATCTTCTTGC<sup>~</sup>CGCTGTTCAACTAGGAATCGGTGGCGTCA  
CTCCCGTGCTTACTTGAAGGTCATAAATAAAAACCAATACGTTCTTACGAAGTGGTTATTTGTTATGATGCCCTGGG  
GATCAACCGCATCCATTGTGTGCGACAATCGAGTTGCTCTTTCGCTCCTAACGGACGTGTGCTCTATCCT

>Rmoschata17\_27

ATGTATTCAAATCAAACATTGGTAAAAGACCTGACTAGCTCTTGGCCGGACCTGAAAAATGGGAACAATCAAAGGTTTT  
GGAGAGAGCAGTGGGATAAACATGGCAAATGCTCAGAACAGACATATACACAAACGCGATACTTCCAGCGCTCCTTCGA  
GATGTGGAACCAATTCGATATTAATAATCTTTACTGCCGCTGGCGTCGTATCACCGCCTGGGACAAAACCACGTATA  
GTCAACGCGAGCGACTTAGAAGCACGCATTGAAGCCGTAACCTCATTCGATACCTGTCTTCCGGTGCAGAAAAGCGGCAG  
TTCTCAGAGGTCAACCGCCAGTTGATTTAATTTATGAAGTGGGCATTTGTTACGATTATGTTGGAACAATCCGTATCC  
TTGTGACCGTTACACGGGAAGATGCACTGCAAATGATATTTACTTT

>Rmoschata17\_32

CTCCAACGAGCTGGCATCTTATCGAGGACACAAAAAGACTACGGAGACATAGAACTAGCCATACGATCAAAAACCTCAA  
AGACACCCCTCCTTCGTTGCGAACAACCTAAGCAGAAACCTACGCAGAAACCTAAGCAGCAGACTCAGTGGTTGCATGA  
AGTGGTACTTTGCTGGGACCATCATGCAAAAAATATGATTGACTGTGATGATACAGAAGCA

>Rlaevigata\_4

ATGTATTCAAATCAAACATTGGTAAAAGACCTGGCTCGCTCTTGGCCGGACCTGAAAAATGGGAACAATCAAAGGTTTT  
GGAGAGAGCAGTGGGATAAACATGGCAAATGCTCAGAACAGACATATGCACAAACGCGATACTTCCAGCGCTCCTTCGA  
GATGTGGAACCAATTCGATATTAATAATCTTTACTGCCGCTGGCGTCGTATCATCGCCTGGGACAAAACCACGTATA  
GTCAACGCGAGCGACTTAGAAGCACGCATTGAAGCCGTAACCTCATTCGATACCTGTCTTCCGGTGCAGAAAAGCGGCAG  
TTCTCAGAGGCCAACCACCAGTTGATTTAATTTATGAAGTGGGCATTTGTTTCGATTATGTTGGAACAATCCGTATCC  
TTGTGACCGTTACACGGGAGATGCACTGCAAATGATATTTACTTT

>Rlaevigata\_7

ATCTCAGAGTTGATTGGCCGCTGGAAAAGAATTGGCCATCTATGAGCTGCCCAAGCAGTAATGGTTACAGGTTCTGGT  
CACACGAATGGCAGAAGCATGGCACCTGCTCCGAATCTGAACTTGGATCAGAAAGATTACTTCCAAGCCGGTCTCAAGCT

CAAGGAAAAAGCAAACCTTCTCCAAGCCCTTAAAAAAGCTGGTAATTTAGTTTCGTCTATACTCAATTGTTTATGACAAA  
TTAATCAAGCTATAT  
>Rlaevigata\_10  
ATGAACCAGTCCACTACACTTGTATCCAACTGAAGATATCTTGGCCCAACGTGGAAAAAGTTGGGAAGGAAATGAATT  
TTTGGACGGATGAGTGGAAACAAACATGGGACATGTTCCGAGCAGAAATATAAGCAAACAGATTATTTTCGAGCGGTCTCA  
CGAAATGTGGAAAGAAAACAATGTCACCTGATATTTTAGATAACGCTGGAATCAAACCAAATGGAACATTACTCCGGAAC  
TACGTGGACATAGAAGGACCGATTAAAGCAGCAATTAACAACAAGACGCCTCTCCTCCGTTGCAAAAATGAGACAATGA  
GCAATACTCCCCGCTTGCATGAAATTTGTCATTTGCTATGCTCATGACGGTACTACTTTGACCGACTGTATCAGTAGCGA  
GGCGACGTGCAAAAGGATAAAATAAAATCAAGTTTTCTTTA  
>Rlaevigata\_28  
ATGGCCCAAAACGGTCAATTGGAGAACAATCTTCAAGAGCATGGCCCAATTGATACCTTATTTTACAGATATGGACT  
TCTGGGGAGATGAATACAATAAGCACGGTACTTGGCTCGGAGAACAAGCTGGACCAGACGCAATATTTTCGGAAAAGCTTA  
CCGGATGTGGTCTCTGTACAGAGCAGATCAGCTGTTTCTAACTCAGGAATCTACGGTGGACGTTACCATACTCGCACT  
GCCCTTGAAAATGCCATTTGGCGAGGGACTAGAGGCTGGCCTCTGCTTAGCTGCTGGTCCAGGAACATAAAAAGTAGCAG  
GTGCCAAATATGAAAATGTTTGGTTTTTGGAGGAGGTCATCATTGTTTTGATTATCTGGGGAGAACGTCATCGATTGT  
GTTTCGACGGACAAATTGCGGTG  
>Rpersica\_4  
GAAGCAGCCGTCAAGTCCAAGATCGGTACCGATACAATACCTCTCATCCTGTGCAAAGAGGACACACTAACTACTGGAA  
GCAGCACAACCTGGATTAATTCTGAGGGAAATAGTTATCTGTTTTGATCACCAGGGAAACAAATCTGGTCAACTGTACCCG  
GCTGACAGATTGCAAGCGGCAGAAAGAGCACAATAAAGACAATATGATATACTACGTACCT  
>Rxanthina\_4  
GATTTTGAAGCAGCCGTCAAGTCCAAGATCGGTACCGACACAAAACCTCTCATCCTTTGTAAGCAGGCCAAAATAACTC  
GTGGGAGCACAACAACCAACTTCATTTTGGGGAAATTTGTGATCTGTTTCGATCACCAGGGGACAAATCTGGTCAATTG  
TACCCGATCAACAGATTGTAACCAGAAGCAGAAGATATACTACGTT  
>Rxanthina\_6  
ATGCTTTCAAATCAAACATTGGTAAACGACCTGACTCGCTCTTGGCCGGACCTGAGAAAATGGGAACCATAAAAAGTTCT  
GGATAGAGCAGTGGGATAAACATGGCCAATGCTCAAAAACAGACATATACACAAAACCGGATACTTCCAGCGCTCCATCGA  
GATGTGGAACCAATTCGATATTAATAATCTTTACTGCCGCTGGAGTTCGATCACCCTACGGACACAACCAAGTATT  
GTCAACGCGAGCGACTTAAAAGCGCGCATTTGAAGCAGTAACTCATAACGGCACCTGTCTTCCGGTGCAGAAAAGCTACAG  
TGCAGAACGTTCAACAGCCAGTTGATTTAATTTATGAAGTGGGCATTTGTTACGATTATCCTGGAACAAAATACTGATTC  
TTGCAACCCCAACAAGGAAAATGCACTGGAAAAGATATTTACTTT  
>Rxanthina\_16  
ATGGACCGCTCATTGGAATCCAAGCTGAATATCTCTTGGCCCAACGTGAAATTCCCGAATAATATCCCCTTTTGGGGTG  
CGCAATGGAGAAAGCATGGGTGATGTTCCATGAGCACATTTAACCAAACAGAGTATTTCAAGCAAGCCGACAATCTTTG  
GAACGCACATAACATCACCAATATCCTCATTACGGGTGGGATCATAACCAATGGATCAGAACACGACTATAATACGGTA  
GCTGGTCCCATCAAACCTGCAACCGGAAAGGTACCGCAACTTCGTTGCCTACAACCTTTCGCAAGTACTCAATGTTGC  
ATGAAGTAGTCCTTTGTTATGATCATAAAGGAACAACGCTGATCGACTGTAACCGTAAACAGGCACCATGCGATCCTAA  
CATCCAAATAAAGTTTATCAAG  
>Rxanthina\_27  
ATACTCACTAGTTTCGTATTTGGTAAGCAAGCTGAGCACCTCTTGGCCCGATGTGAAAAATGCAAATGATAAAAATTTTTT  
GGAAGAAACAATGGGACAAGCATGGCACATGTTTCCTTGCAGACATACGACCAAGCACAACTTTCGAGCGGTATACAA  
CATGTGAAAGAAACCAACCTGACAAACACCTTGGATAGCCTCATCAAACAGACACCGAGACAACAGAACGTACAGAT  
ATAGAACAACCTCATTCAAGGAGTAACTGCAACTGAAAAGAAACCCCTCCTCCGTTGTGAACAATCTCATAGTAATGCCA  
GTAAGTCTCTCTTGAAGAGATTGTCATTTGCTATGCACACAACGGGATTACTGTGATCGATTGCGTCAGTCAACCAAA  
ATCCACCTTCGAATGCTATGACGGATTTTGGTTTCCT  
>Rxanthina\_33  
ATGTCCGCGCCTATCGTCTTCAAACCATATTGCTCCCATCCTCGTGGAGAAGCTATCTTATCGGTGTCTCCAACACAG  
ACTTCTGGGAGAAAGAGTATAACAAACATGGCACATGTTTCGAGCTCAATATGCCACAGACAGAATACTTCACCAAAAC  
CCATTGGCTATGGATGGTCAACAACATTTATAGTATATTTTCATCTTCGGTCAACAGACAAGGATATCTAATCTTGCCG  
GGTTACACCTATGACTACACCGATCTTCTTGGCGCTGTTCAACTAGGAATCGGTGGCGTCACTCCCCTGCTTACTTGCA  
AGGTCATAAATCAAACACATACGTTCTTACGAAGTGGTTATTTGTTATGATGCCTTGGGGATCAACCGCATCCATTG  
TGTGCGACAATCGAGTTGCTCTTTCGCTCCTAACGGACGTGTGTTATATCCT  
>Rxanthina\_36  
ATGCGTGCACACAATCATCTCGAACTCAATTGCTGTATCCTCATGGCCAAGCTACACTGGTCTGTCCAACCTGCACT  
TTTTGGGAGTACGAGTATAACAAGCACGGCACTTGTTCAGAGAATAACCTCAAACAGACGGACTATTTTACCAGAGCCGA  
CGCTTTGTGGAGGCGCTACAATGTTACCAATATGCTTTTAAACATCGCGCCACCAAAATCTCGCCGGGATCCTCCTATCGT  
TACGCTGACATTTTCTATGCCATTCGACAAGGAATTGGGGATACACTCCTTTGATTCTTTGCAAGCAGGATCCGGCAA

ATAATAATTGGATTCTGCACGAGGTGAGAATTTGTTTCGATCCCTTGGGGAATAACGTCATCGCTTGTTCGCAGAAGATC  
GAGATATAGTTGCTCTTACACTAACAGCGGGTTGATAGACTATCCTGAG

>Rarvensis\_3

ATTAATAGCGACATTGAAGCTGCACATAATTAAGCTTGGCCCAGTATTATGGGTAAACCAAACCAAAAATTTTGGGAAC  
ATGAATGGAGAAAACACGGTTCATGTTCCACAGATTTATTACCAACTTCTAATGACTACCTACTGAAAGGAGTTTACCT  
GTGGGAGCAAATCAAGTTTCATGATTTGATGGGTGTGGGTCCGGGTGCCCAATTTAAGCCAATACTCAATATGATGCG  
AACACGGTGTGGCGGCCATCACAAGCAAATACAAGGTCAAACAATGCTGACCTGTCAGGGTGGGGAAATACTGGATG  
TTAGGTTTTGTTATTTAGGACCTTGGGTACTGGTAGATTGCCTGGACACCAACGACCTCCAGTACAGTTTGTACAGG  
TTTAATTTATTATCCTAGAATA

>Rarvensis\_11

GCTCCTCCATTGGAAGCCAGACTGAAGATCTCTTGGCCCAACCTAGAATATGGGAGTGATGCATCGTTTTTGGAAAAGAG  
AGTGGGACAGACATGGCACTTGTTCGATGCAGACACTTACACAAACACAATACTTCGATCGAGCCATAAAAATTTGGGT  
GGAGAAATAATTAATGACATCCTCCGACAAGCAAGCGTCGTATCGGGGACAACAAGAGACTACGCACAGATAGAGTTG  
CCCATAAGAACAAAACCTCAAAAAGATGCCACTCCTCCGCTGCGGAAAGACTCGGTTGTTGCATGAAGTCGTTCTCTGCT  
GGGACCATGATGCAAACGTATGATCGACTGTGATGCTTCAGAAACAAATTTGCCCAATCTATAATATCGATGTTCTA

>Rarvensis\_13

CACAAGTTCTGGAAGGAGTATGATCTCTATTCCATTTTTGAAACAAAAAATATCAAGCCGGGGCAGTCTCGATCGTATT  
CACTGGCTGATTTTTGAAGCAGCCGTCAAGTCCAAGATCGGTACCGACACAAAACCTCTCATCCTTTGTAAAGCAGGCCAA  
ACTAACTCGTGGGAGCACAACAACCACTTCATTTTTGAGGGAAATTGTGATCTGTTTCGATCACCAGGGGACAAAATTTG  
GTCAATTTGACCCGATCAACAGATTGTGACCAGAAGCAGAAGACAATAATCGAGTATGATATACTACGTT

>Rarvensis\_16

ATAATCGACTATTTGGAAACAGATTGGCCGTGCTGGCCCCGAGCCGCAACAGTACGCAGCTTTGGGCCGAAGAAT  
GGAAAACACATGGCACTTGGCTCACAGTCTGCCCTTCATCAGTACAAGTACTTCGCGAACGGTTCGACCCTCAAAGCCTC  
GGTAGACATCCTCAAATGCTACAACCTTGTGTTACCTATTTTTTCATCTTTACCTCCCTCGTCATTTATATATATATA  
TATATGTTATATATTATT

>Rarvensis\_24

ATGTATTTCAATAAAACACTGGTAAATGACCTGACTCGCTCTTGGCCGGACCTGAGAAATGGGAACCATCAAAGGTTTT  
GGGAAGAGCAGTGGGATAAACATGGCAGATGCTCGGATCAGACGTACGGGCAAACCGGATACTTCCAGCGCGCCTTCGA  
GATGTGGAACCAATTCGATATTAATCATATCTTCAGTGCCGTGGCGTGCATCACCAGCCAGGGACACAGCCAAGTATA  
GTCAACGCGAGCGACTTAGTAGCACGCATTGAAGCAGTAACTCAAGCGATACCTGTCTTCGGTGCAGAAAAGCTACAG  
TGCAGAACGTTCAACAGCCAGTTGATTTAATTTATGAAGTGGGCATTTGTTACGATTATCTTGGAAACAAATCTGTTTC  
TTGTAATCCCAAACAAGGAAAATGCACTGGGAAAGATATTTACTTT

>Rarvensis\_26

ATGCTTAGTCAATATCGTCTCCGAACCAAAATGCTGCCATTTCTCATGGCCAAGCTTCACTCGTAGATCCAACATGGGCT  
TCTGGAAATATGAGTATAATCAACACGGCACTTGTTCGGAGAATAACCTCGCGCAGACGGACTATTTTTACAAAAGCCTA  
TGCTCTCTGGATGCGCTACAATGCAAACCTTTATATTATATGCATCTACAGTTATACCAGGCCACAAGATTGTGCCGGGA  
TACCTCTACCATTACGCTGACCTTCTAAACTCCGTTCAACAAGCAATTGGTGGATTCACTCCTTCGCTTATGTGCAAGC  
ACGAGCCTGCAAATAATACTTGGATTCTGCACGAAGTCATCATATGTTTTGATGCCATGGGGAACAACGTCAATTTG  
TGTTAGAGGATCTAGTTGCTCTGCCACTACCACCGGGTATATACACTATCCTTTGCAA

>Rarvensis\_36

ATCTCAGAGTTGATGGGCAGTCTGGAAAAGAGTTGGCCATCTATGAGCTGCCCAAGCAGTAATGGTTACAGGTTCTGGT  
CACACGAATGGGAGAAGCATGGCACCTGCTCCGAATCTGAACCTGATCAGAAAGATTACTTCCAAGCCGGTCTCAAGCT  
CAAGGAAAAAGCAAACCTTCTTCAAGCCCTTAAAAAAGCTGGTAATTTAGTTTCGCTATACTCAATT

>Rminutifolia\_20

GTTGTCTATTGCTTGAATGCTCAGGCTCCTCCATTGGAAGCCAGACTGAAGATCTCTTGGCCCAACCTAGAAATGGGA  
GTGATGCATCGTTTTTGGGCAAGAGAGTGGGACAGACATGGCACTTGTTCGATGCAGACACTTACACAAAACCAATACTT  
CGATCGAGCCATAAAAATTTGGGAGGAGAATAATATTACTGATATCCTCCAACAAGCTGGCATCAGATCGGGGGCAAAA  
AAAGACTACGGACAGATAGAATTACCCATAAAAATTA AAAACTCAAAGATACCCCTCCTTCGCTGCCACAAAACCTAACC  
CGCAGACTCGGTGGTTGCATGAAGTGGTACTTTGCTGGGACCATGCTGCAAAAAATATGATCGACTGTAATGCTGGAGA  
AACAATTTGCGGAAAAATTA AAAATCGATGTTCTA

>Rminutifolia\_33

TCTCTTACTCGCAATATGATATTTAATGCCAGATGCTTTCAAATCAAACATTGGTAAACGACCTGACTCGCTCTTGGC  
CGGACCTGAGAAATGGGAACCATAAAAGTTTTGGATAGAGCAGTGGGATAAACATGGCCAATGCTCACAACAGACATA  
TACACAAAACGCTTACTTCCAGCGCTCCATCGAGATGTGGAACCAATTCGATATTACTAATATCTTTACTGCCGCTGGA  
GTCGTATCACCCTACGGACACAACCAAGTATAGTCAACGCTACCGACTTAAAAGCGCGCATTGAAGCAGTAACTCATA  
CGGCACCTGTCTTCCGTTGCAGAAAAGCTACAGTGCAGAACGTTCAACAGCCAGTTGATTTAATTTATGAAGTGGCAT  
TTGTTACGATCATCCTGGAACAAAACCTGATTCCTTGCAACCCCAAACAAGGAAAATGCACTGGGAAAGATATTTACTTT

>Rmajalis\_2

CAGCGCCAAATCCACCTCAAGCCCCACCTCCAGCGCCCACTCCACCTCCTGATTCCCTTCATTTTGGTCATTGTGTGGCC  
CAATACCTTCTGTCTTTTTGAGTCATGTCAGCTGCATCCACAATCTTTTACTACTACAAGGATTGTAGCCACAGGCGAAT  
GGGAAATCCTTGGTGGACTGCTGGTTCAGAAATGGATGATAGCACCTTAAATGGCAAGAAAGATGATTTGAACAAGTAT  
TGGCCAGACTTGACGCATTCCAAGTTTGAAGAGAGTAAAAGCTTTTGGATAACATGAGTGGGAAAAACATGGTCTGTGCT  
CTGCAAAGAGTCTGCTAATTACTTGAGCCTGGTTTTTGTATCTGATGAAAAACATGATGTGGAACAGATATTTAAAAA  
CAATGGTAAGAAA

>Rmajalis\_12\_

CTTCTCACGCGCTCACAAGTTGTGGCAGGAATTGCAGGCCAAGCATTTGCCGATGAAAAAATCGTACCAGCAGCTGACA  
AAACTTACACCTACACCCAGCTCGAGCAAGCTATTGGAAAACGATTTGGCAGTAATTGGAAGTTGTATTCTTTGCAG  
AAAGGTCAATCTCTCACCTGGTGGTCTGGACCAAAAAAATTTCTACTTCTTTTGCATGAAATCGTATTCTGTTTCGAT  
AACAAAGCAACGGACAAGAAGAGTTGCAACAGAAAAACAAATTTGTGAGAACGCGAAAACTGTAACCTTCATAAAT

### Supplementary File 3

>Rmoschata17\_14

TCCTATGAATATTTTAAATTTGTGGTACAATGGCCACCAGCCCACTGCAGAGTTAGAAAATGCACACCCCAAGCCTTGC  
AAAAGAAAATTTACACCATCCATGGCCTATGGCCGAGTAATTATTCTAAAGCTGTCTGTATAAGTGTCCCGGATCGTC  
TTTTCAAAATCCGGTAAATGCTCCTCCATTGGAAGCCAAACTGAAGATCTCTTGGCCCAACCTAGAACTTCCGAATGAT  
GCAATGTTTTGGGCACTT

>Rpersica\_25

ATGAGTGGTGGAGCCTATCATTTTTTCCAGTTTGTGCAACAATGGCCACCAACTCTTTGCAAAATTAATAAATGCGTTG  
TCCCAAACGCACCCAGAACTTACAGCATCCACGGTTTGTGGCCAAGTAATGCTTCATACAGTTCCGGGGGGTTTGTGTCC  
TGGGGCGCGATTTGACTACGGTTTGGCAGGTGTGTTAGCACCTCTATTACAAAAATCTTGGCCGGACGTGGAAAAAGGT  
AACGACACGAAATTTGGAAACTTGAGTGGGATAGGCATGGAAAATGTTCCGATCAGACATTCGACCAAAGAAGATACT  
TCACACAATCCCACAACATTTGGACGAGATATCATATTCTTAATATCCTTAAAAACTCTCAAATAGAACCAAATGGTAG  
TTTTTACTCTTACACATCAATAGAATCCTCCATCCGAAGTGCAACTCAAACGAGACCCCGTATTCGAACAAGGAATCTT  
CCAATGATCCTAACACAATACGTATGCTCACTACTTGCACGAAATAGTCCTTTGTTTTAAGTATGATGGGGTGCAC  
CGGACAACGTCTCCGCGGTAGTCGGACCACCAGGAGATGTCAAATTTGAA

>Rpersica\_14

TATTGCTTATTCTACGTTCTTTCATACGCAGTAATATGCATAGGATCTTATGATTATTTCCAATTTGTCCTACAATGGC  
CACCAACGGTGTGTAGAATGAAACCATGCATCCAGGCAAAATCCGCCAGAAACTTCAGCATCCATGGTCTGTGGCCAAG  
TAATTATTCAATCAATATGGTGCCAAGTGTCTGCGGTGGGGCGGCATACGTCCCGCTGTGACTAATGCGTTAGCACCT  
TTACTAAGAGTCTCTTGGCCGGACGTGGAAAAAGGCAACGAACAGGACTTCTGGAAACTTGAGTGGGACAGACATGGCA  
AATGTTCCGAACAACATTAACCAAACAAGATACTTACACAATCCCACAACATTTGGAATCGATATCATATTCTTGA  
TATCCTTAAAACTCTCAAATAGAACCAAACGGTAGTTTGTACCTTTACACAGATATACAATCCTCCATCCGAAAAGCA  
ACTCAAATGACACCTCGTATTCGAACGAAGCAACTTTTAAACCGATCCTAAGAACGCATCATCGTTTGTCTTCTACTTGC  
ACGAAATGGTCTTATGTTATAAGTATGACGGGGTGCACCCGAAACTGCTCGGCAGCAGGCTCACGGCAACAATATGT  
CAAATTTGCTATAAAA

>Rrugosa14\_28

TTTGTGCAACAATGGCCACCAACTTTTTGCAAAATTAATAAATGCGTCCCAAACACACCAGAAACTTCACCATCCATG  
GTTTGTGGCCAAGTAATGCTTCATACAGTTCGGCGGGTTTGTGTCTTGGAGCGGTATTTAACTTCAATTTGGCAGGTGC  
GTTAGCACCTCTATTACAAAACCTTTGGCCAGACCTGGAAAATGGTAACGCCACGAGATTTTGGAAACTTGAGTGGGAT  
AGACATGGCAAATGTTCCGACCAGACATTAGACCAAAGAAGTACTTACACAATCCCACAACATTTGGACTAGATATC  
ACATCTTGATATCCTTAAAACTCTCAAATAGAGCCAGATGGTAGTTTGTACTCTTACACATCAATAGAATCCTCCAT  
CCGA

>Rchinensis2\_16\_Rchinensis3\_17\_Rchinensis3\_19

ATGTCTACAGGGTATTACGAATATTTCAAACCTTGTCGAACAATGGCCACCAACCAACTTGCCAAAATGCAAACTGCCGCA  
GAGTACCGCCACCTCGCCTCTTTACCCTCCATGGGTTTTGGCCATCTAATTATTCAAACAATGTCGTGGCTAATTGCAC  
TAACGCAATATTTCAACGGATGGATCGCTCATTGGTATCTAACTGAATATATCTTGGCCCAATGTGAAATATCCGAAT  
AATATCCAGTTTTTGGGATAAACAGTGGAGAAAACATGGCTCATGTTCCGTGCACACGTTTAAACCAAACAGAGTACTTCA  
CGCAAGCGGATAATCTTTGGAACCTCACACAACATTACTGATATTCTTATAACTGGTGGGATCAAGCCAAATGGATCAGA  
ATATGCATACGATACGGTAGAGCGGCCATCCAAATTTGCAACCGGGAAGGAACCCGAACCTCGTTGCGCACCATCCTCC  
CTTGGAAAGGCAATTGTTGCATGAAGTAGTACTTTGTTATAATCATAAGGGAACAACGCCCATCGACTGTAACCCCTTAC  
ATTCAACCTGCGATCGTAACTTCCAAATAAAGTTTATT

>Rchinesis1\_3\_Rchinensis2\_27

ATGGCAATGTTGAAATCATCGTTTCGCTTTAATTGCTCTTGGCTTTTGGCTCTCTGTTTCACTATGAGCATTGGTTCCCTATG  
AATATTTTAAATTTGTGGTACAATGGCCACCAGCCCACTGCAGGGTTAGAAAATGCACACCCCAAGCCTTGCAACAGAA

AATTTACACCATCCATGGCCTATGGCCGAGTAATTATTCTAAAGCTGTTGTGTATAAATTGTCCGGGATCGTCTTTTCAA  
AATCCGGCTCCTCCATTGGAAGCCAAACTGAAGATCTCTTGGCCCAACCTAGAACGTCCGAACGATGCAATGTTTTGGG  
CACTTGAGTGGGACAGGCATGGCAAGTGTTCGGAGCAGACATTTACACAAACCCAATACTTCAATCGAGCCCATGAAAT  
TTGGGTGGGGAAGAATATTACTGACATCCTCCAGAGAGCTAGCATCTTATCGGGGAGACAAAAAGACTACGGAGTTATA  
GAATTAGCCGTACGATCAAAAACCTAAAAGACACCCCTCCTTCGCTGCGAACAACCAAAGCAGAAACCTACGCAGAAAC  
CTACGCAACCTACGCAGCGGACTCAGTGGTTGCATGAGGTGGTACTTTGCTGGGACTATCATGCCAAAAATATGATTGA  
CTGTGATGATACAGAAGCAACATGTCAAGATACTTTTCCAATCGATATTCTG

>Rmultiflora\_8

CAATACTCATTTGTTTTGTGTCAAGGCCTCATTTTGGAAATTTAATGTTTCGTTTGTCTTGTGTCACAATTAATTTCCA  
CAGGATCGTATAAATATTTCAAATTTGTTGTACAATGGCCACCAGCCACTGCAGTGTTTTTAAATGCCACAATAGCAA  
CCCGCCAAAGATATACACCATCCATGGCCTATGGCCAAGTAATCGTTCTAATGCAGCTCGCAGTAAGTGCCAGGGATCG  
TCATTTCAACAACCGGCTCTTCCATTGGAAGCCAAACTGAAGATCTCTTGGCCTAACCTAGAAAATTTGAGTGATGCGC  
AGTTTTGGGAACCTGAATGGAACAGACATGGCAAGTGTTCGGAGCCGACATTTACGCAAACCCAATACTTCAATCGAGC  
CCATGAAATTTGGATGATGGATGACATTAATATTACTGATATCCTCCAAAATGTTACATCGTATCAGGGAAACAAAA  
ACCTACGCAGAGATAGAATTTCCCATTTGAATCAAAAACCTAAAAGACAATCCTCCTTCGCTGCCTAAACCCCTCAGAAGT  
TGCATGAAGTGGTAATTTGCTGGGACCATGCTGCAAAAAATATGATCGACTGTAATCGTACAGAAGCAACATGCTCAA  
CAGCAGTCTAATTGATGTTCTA

>Rmultiflora\_4

TCACAATTAATTTCCACAGGGTCTATGACTATTTCAAATTTGTTGTACAATGGCCACCAGCCACTGCAGTGTTTTTA  
AATGCCACAATAGTAACCCGCCACACATTTACACCATCCATGGCCTATGGCCAAAATAATCGTTCTAAGGCAGTCGGGAA  
TAAGTGCCAGGGATCGTCATTTCAAAGCCGGCTCCTCCATTGGAAGCCAAACTGAAGATCTCTTGGCCTAACCTAGAA  
AATTCGAGTGATGCGCACTTTTGGGAACCTCAGTGGAAACAAACATGGCAAGTGTTCGGAGCCGACATTTACGCAATCCC  
AATACTTCGATCGAGCCCATCAAATTTGGATGATGGAGAAATTAATATTACTAGTATCCTCCAAAATGTAAACATCGT  
ATCAGGGAAAACAAAAGCTACGAAGAGATAGAATTTCCCATTTGAATCAAAAACCTCACAAGACACCACTCCTTCACTGC  
ATAAACACTCAGAAGTTGCATGAAGTGGTACTTTGCTGGGACCATGCTGCAAAAAATGATCGACTGTAAACATACAG  
AAGCAACATGCTCAAGGAATAGTCCAATTGAGATTCTA

>Rmajalis\_20

TTTTTTTTTTTCAACACAATAATGTCTCTAGGTTTCATATGATCATTTTAAATTTGTACAACAATGGCCACCGGCCGTCT  
GTGACACGTCTGGCTGCAACAGATCGGGGTTATCACGCTTCACGATCCATGGCCTTTGGCCAAATAATAAAACGTATGT  
GAAAAATCAACCGACTTGTCTTACCAATCAGACCAACTCATTTAAGGCTGCGATACTCACTAATTCGAATTTGGTAAGC  
AAGCTGAGCACCTCTTGGCCTGATGTGAAAAATGCAAAATGATAAATTTTTTTTGGAAAGAAACAATGGGACAAGCATGGCA  
CATGTTCTTGCAGACATACGACCAAGCACAATACTTCGAGCGGTCATACAACATGTGGAAAGAAACCAACCTGACAAA  
CACCTTGGATAGCCTTATCAAACAGACACCGAGACAACAGAACGTCACAGATATAGAACAACCTCATTCAAGGAGTAACT  
GCAACTGAAAAGAAACCCCTCCTCCGTTGTGAACAATCTCATAGTAATGCCAGTAAGTCTCTCTTGAAGAGATTGTCA  
TTTTGCTATGCACACAACGGGATTACTGTGATCGATTGCGTCAGTCAACCAAAATCCACCTTCGAATGCTATGACGGATT  
TTGGTTTCCT

>Rrugosa14\_13

ATGTCTCTAGGTTTCATATGATCATTTTAAATTTGTACAACAATGGCCACCGGCCGTCTGTGACACGTCTGGCTGCAACA  
GATCGGGGTTATCACGCTTCACGATCCATGGCCTTTGGCCAAATAATAAAACGTATGTGAAAAATCAACCGACTTGTCT  
TACCAATCAGACCAACTCATTTAAGGCTGCGATACTCACTAATTCGAATTTGGTAAGCAAGCTGAGCACCTCTTGGCCC  
GATGTGAAAAATGCAAAATGATAAATTTTTTTTGGAAAGAAACAATGGGACAAGCATGGCACATGTTCTTGCAGACATACG  
ACCAAGCACAATACTTCGAGCGGTCATACAACATGTGGAAAGAAACCAACCTGACAAACACCTTGGATAGCCTTATCAA  
ACAGACACCGAGACAACAGAACGTCACAGATATAGAACAACCTCATTCAAGGAGTAACTGCAACTGAAAAGAAACCCCTC  
CTCCGTTGTGAACAATCTCATAGTAATGCCAGTAAGTCTCTCTTGAAGAGATTGTCAATTTGCTATGCACACAACGGGA  
TTACTGTGATCGATTGCGTCAGTCAACCAAAATCCACCTTCGAATGCTATGACGGATTTTGGTTTTCT

>Rminutifolia\_34

ATGTCTCTAGGTTTCATATGATCATTTTAAATTTGTACAACAATGGCCACCGGCCGTCTGTGACACGTCTGGCTGCAACA  
GATCGGGGTTATCACGCTTCACGATCCATGGCCTTTGGCCAAATAATAAAACGTATGTGAAAAATCAACCGACTTGTCT  
TACCAATCAGGCCAACTCATTTAAGGCTAAGATACTCACTAGTTTGAATTTGGTAAGCAAGCTGAGCACCTCTTGGCCC  
GATGTGAAAAATGCAAAATGATAAATTTTTTTTGGAAAGAAACAATGGGACAAGCATGGCACATGTTCTTGCAGACATACG  
ACCAAGCACAATACTTCGAGCGGTCATACAACATGTGGAAAGAAACCAACCTGACAAACACCTTGGATAGCCTCATCAA  
ACAGACACCGAGACAACAGAACGTCACAGATATAGAACAACCTCATTCAAGGAGTAACTGCAACTGAAAAGAAACCCCTC  
CTCCGTTGTGAACAATCTCATAGTAATGCCAGTAAGTCTCTCTTGAAGAGATTGTCAATTTGCTATGCACACAACGGGA  
TTACTGTGATCGATTGCGTCAGTCAACCAAAATCCACCTTCGAATGCTATGACGGATTTTGGTTTTCT

>Rmoschata08\_18

ATGTTATTGAATCTAATCAGCTGCTCTTATATAAGTTTTGACATTCTTCTCTTCTGTTTTTTTTTTTTTTTTTTTTTT  
TCAACACAATAATGTCTCTAGGTTTCATATGATCATTTTAAATTTGTACAACAATGGCCACCGGCCGTCTGTGATACGTC  
TGGCTGCAAGAGATCGGGGTTATCACACTTCACGATCCATGGCCTTTGGCCAAATAATAAAACGTATGTGAAAAATCAA

CCGACTTGTCTTACCAGTCATGCCAACTCATTTAAGGCTACGATACTCACTAGTTTGAATTTGGTAAGCAAGCTGAGCA  
CCTCTTGGCCCGATGTGAAAAATGCAAATGATAAAGATTTTGGAAACAAACAATGGGACAAGCATGGCACATGTTCCCTT  
GCAGACATACGACCAAGCACAATACTTCGAGCGGTTCATACAACATGTGGAAAGAAACCAACCTGACAAACACCTTGGAT  
AGCCTCATCAAACAGACACCGAGACAACAGAACGTCACAGATATAGAACAACCTCATTCAAGGAGTAACTGCAACTGAAA  
AGAAACCCCTCCTCCGTTGTGAACAATCTCATAGTAATGCCAGTAAGTCTCTCTTGAAGAGATTGTCATTTGCTATGC  
ACACAACGGGATTACTGTGATCGATTGCGTCAGTCGACCAAAATCCACCTTCGAATGCTATGACGGATTTTGGTTCCCT  
>Rmajalis\_11  
ATGAGTATTTTTACATTGTTTCTCCCCCAAACCTCCACAGGCGGATACTATGAATATTTCAAGATGGTGGAACAGTGGC  
CGTTAGGATATTGCACAGGTTCGACCAGATCCTTGCAACAAAACCTCCACCAAACATGTTCCACCATCCATGGTTTTTGGCC  
CAGTAATTATTCAACAAATCCAGCAGATACATGCAAAGGGACTTCGTTCAACGAGACTATGATGCGTAAAAATCAAACA  
TTGGTATCCGCACTACAGAGAGTATGGCCAGACCTGGCCGACGGAGATGATTTTGGTCTGGAGACGTCAGTGGGACA  
AACATGGGAAATGTTTCGAGCAAACATTTTCAGCAAATGCAATATTTTCGAGCGTGCAAATGTTATTTGGAACAAACCGAA  
TATGACTTTGATCTTTAAAAATAATGGAATCCTAGCAGGGGGGGCAAATATAACTCCACAGACTTGGTATCACGCATT  
GAAAAGGTGCTTCGGACCACGCCCTACTTCATTGCAAATGGGTAACGGATCCTAAT  
>Rrugosa14\_1  
TACACCCATCTTGTCCAAATGTGGCCGCGGGTTCATTGTCATTTCCCACCACATTGCACTGCACCGATACCTCGGAACT  
ACTTTAGTGTGCATGGCTTATGGCCAAGTAATCATAGTGTGCCAAGATTACATACAAGATGTATATGTTCCCTTCTCC  
TGAACACTGGTTTTAAACTT  
>Rrugosa14\_2  
TACGACTACTTTTCAGATGGTATACCAATGGCAGCCAGCCTACTGTGTTGGTAGAAAAGATCCTTGCAGAATAAAACCAT  
CAAAAACTTTTACCATTTCATGGTCTATGGCCAAGTAATTTTTCAGACATTCCAGGGGATAAGTGAAGGGGGCACTCTT  
TAACGACAGTCTG  
>Rrugosa14\_3  
GCAGAGCCATACGAATACCTACAGTTTGTCTTGAATACGCTAGAGGTTCTGTGTTAACGTCAAGAAATGCATTCGAC  
CGGCGAGCTTGGCCGCAAAATTCACGGTTCATGGAATTTGGCCACGAATATT  
>Rrugosa14\_7  
TCCTTCAATGGCCAACTACATTATGCATTAACCAAATCTGCATCCCAAATATCCCGCTGGACTTCACTCTACATGGGTT  
ATGGGCCACCAATATCTCTGGCCAAAACAACCCTTGTGTTG  
>Rrugosa14\_11  
GGCAGGTCAGATTGTATCCCAAATCCCCCGCAGAATTACTTTACTATTACGGGCTTTGGCCATCCAATTACTCGACTC  
CTGGACAGGATTGCCATGGCACACCTTTTAGTGGAACTGAGGTATT  
>Rrugosa14\_12  
GATTGTGTCCGGAATCCCCCGGGAATACTTTTACAATTCATGGCCTTTGGCCAAGTAATTACACGACACCTGAAAAGC  
CATGCGTTGGCACACCCTTTAGTCCA  
>Rrugosa14\_23  
TACTTCCAGTTTGTCCAGCAATGGCCGGCTACATTCTGCTATCAAATTCGGATTGTGTCCGGAATCCCCCGGGTATA  
CTTTTACCATCCACGGCCTCTGGCCAAGTAATTACACGGCACCTGAAAAGCCATGCGTTGGCACACCCTTTAGTCCA  
>Rrugosa14\_24  
ATGAAGTCCATCCCCTCAAAAATGGTCAAGCTTCTAATACTAGCACTAGTAGGATCATCATGTCTTTCAGTCCCTTGTG  
CTGCAGAAGATTTGATTTCTTCTACTTTGTTTCAGCAGTGGCCAGGATCATTCTGTGATACACAGAAAAGTTGCTGCTA  
TCCAACCACAGGGAAGCCTGCAGCAGATTTGGGATTTCATGGGCTCTGGCCAAATTAACAAGGATGGTTCATACCCCTCA  
AACTGTGATCCAAACAACCCTTTGATCAATCTCAG  
>Rrugosa14\_25\_Rrugosa19\_25  
GCAGAGCCATACGAATACCTACAGTTTGTCTTGAATACGCTAGAGGTTCTGTGTTAACGTCAAGAAATGCATTCAC  
CGGCGAGCTTGGCCGCAAAATTCACGGTTCATGGAATTTGGCCACGAATATTTCC  
>Rrugosa14\_29\_Rrugosa19\_29  
ATGGCTGCAGTAACAGTAGCATCAGTCATTGTGCTATTTTTTCCCTTCCACTTGGTGTGATCATAAATGCGGTTCGGAGAGG  
AAGCCGGACAGCCGATTATGAGTACCTGCAATTTGTACAGCAATATCCAGAACAGTGAATCGAAGGTCAACATTA  
CAATTTACCATTTCATGGCCTATGGCCTAGCAATCGCAGCAATAATCATGTTATATTTTGTGGTCAAATATCAGCGTG  
AATACACTTTTAAGGCAG  
>Rrugosa14\_38\_Rrugosa19\_34  
TACTTCCAGTTTGTCCAGCAATGGCCGGCTACATTCTGCCATCATAATCCGGATTGTGTCCGGAATCCCCCGGGAATA  
CTTTTACAATTCATGGCCTTTGGCCAAGTAATGACACGACACCTGAAAAGCCATGCGTTGGCACACCCTTTAGTCCA  
>Rrugosa19\_7  
TTTGTCCAGCAATGGCCGGCTACATTCTGCTATCAAATCCGGGTTGTGTCCGGAATCCCCCGGGAATACTTTTACCA  
TTCATGGCCTTTGGCCAAGTAATTACACGACACCTGAAAACCCATGCGTTGGCACACCCTTTTAGTCTAGCTGAGGTATT  
GCATGCATGGAATAAATTTTCATTTT  
>Rrugosa19\_10

ATGTCTACAGGGTATTACGAATATTTCAAACCTTGTGCAACAATGGCCACCAACCCTTGCCAAAATGCAAACCTGCCGCA  
GAGTACCGACACCTCGCCTCTTTACCCTCCATGGGTTTTGGCCATCTAATTATTCAAACAATGTCGTGGCTAATTGCAC  
TAACGCAATATTTCAACGGGTATATAGTGTATGTTCTTGGCTTTTCGCTTTTTTATTTAT  
>Rugosa19\_11  
TTTCAAACCTAAAAGATAGTTTTCACGTTATTTAACATGCATTTTGATGAATCGATGCAGTGGCCTGGAGCATATTGCG  
ACACAAAGCATAGTTGTTGCTATCCAAAGTCAGGGAAGCCTGCAGCAGATTTTCGGCATTACGGTCTCTGGCCAAACTA  
CAAGGATGGCTCTTACCCTTCAAACCTGTGATCCAGACAGTGTCTTCGACAAATCTGAGGTACACGACACCTATACTTTA  
ATCAACATATATATAACC  
>Rugosa19\_21  
ATTCTCTGTGCTTTTGGGGTTGCTAATGCAGCTAACACCTACGATTATCTTCTACTAGTCCTTCAATGGCCAACTACAC  
TATGCATTAACCAAACCTGCATCCTGAATCTCCCGCTGGACTTCACTCTACATGGGTTATGGCCAGCAATATCTCTAG  
C  
>Rugosa19\_37  
CTTCTCTCTGCGTGGGGGGCAGCTGATGCAGCCAATCCCTACGACTACCTCCAATTCGTCCAACAGTGGCCTGCTACAT  
TCTGTTCCGGCAGGTGATTTGTATCCCAAATCCCCCGCAGAATTTCTTTACAATCCACGGC  
>Rugosa19\_45  
ATGAGTAAGAAATGGAATCCATTTTATGTATTTTTTAACATTTCTTTTCCCCTCGGAATATCTTTCTACAGCGAGCTACG  
ATTATTTTCAATTTGTGCAACAATGGCCACCAAACCTTCTGCTATGGTAGATATCCTGGTTGCAATAACACGCTATCATT  
CACCATTTCATGGCTTGTGGCCAAATAATTTTTCTCAAGTTTATTACAATCATAATTGTCAAGGGAACGGATTTGACAAAT  
CAGGTACATATG  
>Rugosa\_19  
TTTGTGCAGCAATGGCCACCAAACCTTCTGCTACGGTAGATATCGTCCTTGCAATAGGCAATCATTACCATTCATGGCC  
TGTGGCCAAATAATTTTTTACAAGTTAATTACAATCATAATTTGTTTCAGGGGCCGATTTAAAAATCAG  
>Rodorata\_gigantea\_9  
AATTCTGCTTCAGGTTCTGTGAGACTATGCTTGTCTGCTAGTATTGGCATCGATGGCAACCTCCGTCAACTCACAAT  
ATCAGTACACCCAGCTTGTCCAAATGTGGCCACTGGGTCAATTGTCATTTCCCACCACATTCGACTGCACCGATACCTGT  
GAATTACTTTAGTGTCCATGGCTTATGGCCAAGTAATCACAGTGTGCCCCAAATTAGATGCAACAATGCATATCTTCCC  
TTCTCCGGG  
>Rodorata\_gigantea\_20  
ATGGGGATCATGCAACTCGCCCTGCTCCTTCTCTCTGCGTGGGGGGCAGCTGATGCAGCCAATCCCTACGACTACCTCC  
AATTCGTCCAACAGTGGCCTGCTACATTCTGTTCCGGCAGATCAGATTGTATCCCAAATCCCCCGCAGAATTTCTTTAC  
AATCCACGGCCTTTTTGTTTTTGGCAAAGAGTATTTGAGAGGGGGCCGGGGAGGC  
>Rodorata\_gigantea\_25  
CAATTTGTACTCCAGTACCCACCTGGAGTTTGCTATGACAGATCAAAGGTTATTGCATCTTACCTCTGCCAACCAAGT  
TTCATGTACATGGAATATGGCCTTCCAACCTTCTCCGATATAGATGTCACTTGTGGTCAAGCACTGACGAATAACCCCTT  
TGATAACGCGCAGGTGTGTATG  
>Rodorata\_gigantea\_29  
TACTTGTGTTGTTGTTCAAACAGTGGTCCAAGACTGTTTGTGGTGACAGCTGCAAAGCTCCCTCTCTAGTTTTTACAATAC  
ATAGGCTCTGGCCCTCCAACCACACTAGCCCTCAGCTGTGCTGCACTGGT  
>Rodorata07\_1  
ATGGGCTGCATGAGAATTTTGGATACGAATGAGACTTGCTTATGGCACCTATGATTACCTTCTACTAGTCCTTCAAT  
GGCCAACTACATTCTGCATTAACCAAACCTGTATCCCAAATCTCTCGCTAGACTTCACTATAACATAGGTTATGGCCAG  
CAATATCTATGGCCAAAACAAACCTTCT  
>Rodorata07\_2\_Rodorata\_gigantea\_40  
CAATTTGTACTCCAGTACCCACCTGGAGTTTGCTATGACCAATCAAAGGTCATTGCATCTCACCTCTCCCAACCAAGT  
TTCATGTACATGGAATATGGCCTTCTAACTTCTCCAATACACTT  
>Rodorata07\_4  
ATGAGACTATGCTTGTGTTCTGCTAGTATTGGCATTGATGGTACCCTCCGTCAACTCAAATATCAGTACACCCAACTTG  
TCCAAATGTGGCCACTGGGTCACTGTCATTTCCCACCACATTCGACTGCACCGATACCTCGGAACTACTTTAGTGTGCA  
TGGCTTATGGCCAAGTAATCACAGTGTGCCCAAGATTACATGCAAGAAT  
GTATATGTTCCCTTCTTCGGAACACTG  
>Rodorata07\_101  
ATGGGGATTAATGTCATCCTGATTCTTCTCTGCTTATCAGCAACGTTGCTAGTGCAGCCAACACATACGATTATCTTC  
AACTAGTACTGCAATGGCCAAACACGTTCTGCATCAGTAACCAAAGTGCATATCAAATCTCCCACTAGACTTCACCAT  
ACATGGGTTATGGCCTAGCAATTTCTCCGGCCAAAATAACCCATGT  
GTGGGTGCGCCATTTAATAGAGCTCAG  
>Rodorata07\_15\_120\_1

GAATACCTACAGTTTGTCTTGCAATACGCTAGAGGTTCTGTGTTAACGTCAAGAAATGCATTCCACCGGCGAGATTGC  
CGGCCAAATTCACGGTTCATGGAATTTGGCCCACGAATATT  
>Rodorata07\_16\_Rodorata\_gigantea\_24  
TTTCTTTTCGCAATAATGTCTACAGGGTATTACGAATATTTCAAACCTGTGCAACAATGGCCACCAACCCTTGCCAAA  
ATGCAAACCTGCCGAGAGTACCGCCACCTCGCCTCTTTACCTCCATGGGTTTTGGCCATCTAATTATTCAAACAATGT  
CGTGGCTAATTGCACTAACGCAATATTTCAACGGGTATATAGT  
>Rodorata07\_18\_Rodorata\_gigantea\_16  
ATGGCACAAAATAATATGGCTTACGTCCTCATGACCTGCACTACTGTTGCCTTACTCTTTACTCTGGCCTCCTCGTATA  
CCGCCTACGAATACTTCTTGTGTTTCAACAGTGGTCCAAGACCGTTTGTGGTAACAGCTGCAAAGCTCCCTCTCCAGT  
TTTTACGATACATGGGTTGTGGCCCTCCAACCACACTGGCCCTCAGCTGAAGTGCCTGGTGCAGCATATAATCCCACA  
GAG  
>Rodorata07\_19  
CCATACGAATACCTACAGTTTGTCTTGCAATACCCTAGAGGTTACTGTGTTAACGACAAGAAATGCATTCCACCGGCGA  
GCTTGGCAGCCAAATTCACGGTTCATGGAATTTGGCCCACGAATATT  
>Rodorata07\_20  
ATGGCTGCAGTAAACAGTAGCATCAGTCATTGTGCTATTTTTCTTTCCACTTGGTGTGATCATAAATGCGGTTCGGAGAGG  
CAGCCGGACAGCCGTATTATGAGTACCTGCAATTTGTACAGCAATATCCCAGAACAGTGTATCCAAGCTCAACATTTAAA  
CAATTTACCATTCATGGCCAATGGCCTAGCAATTTACGAATATTAATCCTGTTATATTTTGTGGTCAAAAATAGCAGC  
>Rodorata07\_24\_Rodorata\_gigantea\_42  
ATGTCTCTAGGTTTCATATGATCATTTTAAATTTGTACAACAATGGCCACCGGCCGTCTGTGATACGTCTGGCTGCAAGA  
GATCGGGGTTATCACGCTTACGATCCATGGCCTTTGGCCAAATAATAAACGTATGTGAAAAATCAACCGACTTGTCT  
TACCAATCGGGCCAACCTCATTTAAGGCTACG  
>Rodorata07\_28  
TACTTGTGTTGTTGTTCAACAGTGGTCCAAGACTGTTTGTGGTGACAGCTGCAAAGCTCCCTCTCCAGTTTTTACAACAC  
ATGGGCTCTGGCCCTCCAACCACACTAGCCCTCAGCTATCGTGCCTGGTGTAGCATATAATCCTACAACG  
>Rodorata07\_29\_Rodorata\_gigantea\_15  
TTTGTGCAGCAATGGCCACCAAACTTCTGCTACGGTAGATATCGTCCTTGAATAGGCAATCATTACCATTCATGGCC  
TGTGGCCAAATAATTTTTACAAAGTTAATTACAATCATATTTGTTACAGGGGCCGATTTAAAAATCAG  
>Rodorata07\_37  
TTTGTACTCCAGTACCCACCTGGAGTTTGTCTATGACACATCAAAGGTTATTGCATCTCACCTCTGCCAACCAAGTTCC  
ATGTACATGGAATATGGCCTTCTAACTTCTCCGATATACATGTCACCTGTGGTCAAGCACTGAAGAATAACCCCTTTGA  
TAACGCGCAGGTGTGTATGTGT  
>Rodorata07\_39  
AAAATTTACACCATCCATGGCCTATGGCCGAGTAATTATCTAAAGCTGTTGTGTATAATTGTCCGGGATCGTCTTTTC  
AAAATCCG  
>Rmoschata08\_7  
GCAGAGCCATACGAATACCTACAGTTTGTCTTGCAATACGCTAGAGGTTACTGTGTTAACGTCAAGAAATGCATTCCAC  
GGGCGAGCTTGGCCGCAAAATTCACGGTTCATGGAATTTGGCCCACGAATATTTCC  
>Rmoschata08\_12  
TGTTCTAACACTTGTCTATTGTTTTTGCCTCACGCCTCACTCAACAATTTAATATTTGTTTATTTCTTCTCACAATTAA  
AATGTACAGGATCCTATGAATATTTAAATTTGTGGTACAATGGCCGCCAGCCACTGCCATTTTAGAAAATGCAAAAT  
CCAAGCCTTGCAGAGAAAATTTACACCATCCATGGCCTATGGCCAAGTAATTATTCGAACCTCTCCCGTGGAGTACTGC  
CCGGGATCGCGATTTCAAAAATCCG  
>Rmoschata08\_14\_Rmoschata17\_36  
ATGTTAATGCAGTGGCCAGGATCATTCTGTGATACACAGAAAAGTTGCTGCTATCCAACCACAGGGAAGCCTGCAGCAG  
ATTTTGGGATTCATGGGCTCTGGCCAAATTACAAGGATGGTTCATACCCCTCAAACCTGTGATCCAACAACCCCTTTGA  
TCAATCTCAG  
>Rmoschata08\_15  
TCCAAGACTGTTTTATGGTGACAGCTGCAAAGCTCCCTCTCCAGTTTTTTACAATACATGGGCTCTGGCCCTCCAACCACA  
CTAGCCCTCAGCTGTCTGCTGACTGGTGTAGCATATAATCCCACAACG  
>Rmoschata08\_30  
AATCCCTATGACTACCTCCAATTCGTCCAACAGTGGCCTGCTACATTATGTTCCAGCAGGTCAGATTGTATCCGAAATC  
CCCCGAGAATTTCTTTACAATCCACGGC  
>Rmoschata08\_34  
GGGATCATGCAACTCGCCCTGCTCCTTCTCTCTGCGTGGGGGGCAGCTGATGCAGCCAATCCCTACGACTACCCCAAT  
TCGTCCAACAGTGGCCTGCTACATTCTGTTCCGGCAGGTCAGATTGTATCCCAAATCCCCGAGAATTTCTTTACAAT  
CCACGGCCTTTTTTTTTTTTTTTGGCAAAGA  
>Rmoschata08\_37



TCCATGAGCCTATGCTTGTCTGCTAGTATTGGCATTGATGGCACCCCTCCGTCAACTCAAATATCAGTACACCCAAC  
TTGTCCAAATGTGGCCACTGGGTCACTGTCATTTCCACCACATTGCACTGCACCGATACCTCGGAACACTTTAGTGT  
GCATGGCTTATGGCCAAGTAATCACAGTGTACCCAAGATTACATGCAAGAAT  
GTATATGTTCCCTTCTCCGGAACACTG  
>Rmoschata08\_39  
TATTTTCAATTGGTGAACAATGGCCGCCACAACCTGCTATCCACCCAAAATTTGCCACAGAATTCCGCCAGCTCGC  
CACCACACCTCTTACCATCCATGGGTTTTGGCCTAGTAATTATTCAGGCATTACAGTGGTTAATTGCACAGCGGGACT  
ATTTCAAAGGTATATCGTATT  
>Rmoschata17\_2  
CCGGCCGTCTGTGACACGTCTGGCTGCAACAGATCGGGTTATCACGCTTACGATCCATGGCCTTTGGCCAAATAATA  
AAACGTATGTGAAAATCAACCGACTTGTCTTACCAATCAGGCCAACTCATTTAAGGCTAAG  
>Rmoschata17\_15  
CAGTGGCCTGCTACATTCTGTTCCGGCAGGTGAGATTGTATCCCAAATCCCCGCAGAACTACTTTACTATTACAGGGC  
TTTGGCCATCCAATTACTCGACTCCTGGACAGGATTGCCATGGCACACCTTTTAGTGGAAGTGAAGTATTC  
>Rmoschata17\_18  
GTCCTTCAATGGCCAACTACATTATGCATTAACCAAAAAGTGCATCCCAAATCTCCCGCTGGACTTCACTCTACATGGGT  
TATGGGCCAGCAATATCTCTAGCCAAAACAACCTTGTGTT  
>Rmoschata17\_30  
ATGCCGCaAAACAAATATGACTATCTACAAGTGTGCAACAATGGCCATAAATAACCAAGCTTGCA  
TTCAAGGTGCAGCCCTCCCGGAGCTGTTCTCGATACATGGTATGTGGCCATCTAATTTCTCCGGCCAGAACGACGCTTG  
TGTTGGAAGTTCAGCATGAGAGAGGTACATATATAT  
>Rlaevigata\_3  
AATTTTGACATAGTTTTTTTTTCTTTTCTTTTTGAAAATAATTTATGTAGGTTTCGTATCACTATTTTAAATTTGTGC  
AACAATGGCCGCCAACCACTGCTACAACAAAGGTTGCCAGGCCAACCAACATATTTACCATCCACGGCCTTTGGCC  
TAGCAATCGAAGTTGGATACACAACCAAGGTTGCTCTGGGACGTCATTTAATGGGAATTTG  
>Rlaevigata\_8  
ATGGCAGTAGTGGCATCGTCTTCTTTTATTCTTACCTCTGCTTTCTTCCGGTGTCTGTTTGAGCATCGGTG  
CCTACGATTATTTTCAATTTGTGTCAGCAATGGCCACCGAACTTCTGCTACGGGACTAGATATCCTGGTTGCAACATTA  
CAGGCGATCATTACCATTTCATGGCCTGTGGCCAAATAATATTTCTCAAATTAATTAACAATCATATTTGTGCAACGGGA  
AGC  
>Rlaevigata\_9  
AAGTACGACTACTTCCAGTTTGTCCAGCAATGGCCGGGTACATTCTGCTATCAAAATCCGATTGTGTCCGGAATCCCC  
CGCGGTATACTTTTACCATCCACGGCCTCTGGCCAAAGTAACACTACAACCTTACCAGTCTAACACTAGTATGTATGTGCGC  
ATAT  
>Rlaevigata\_11  
ACCCTGAAAGATAGTTTCTCGTTATTTAACATGCATTTTGTGATGAATCGATGCAGTGGCCTGGAGCATATTGCGACACAA  
AGCATAGTTGTTGTTATCCAAAGTCAGGGAAGCCTGCAGCAGATTTCCGGCATTACGGTCTCTGGCCAAACTACAAGGA  
TGGCTCTTACCCTTCAAAGTGTGATCCTGACAGTGTCTTCGACAAATCTGAG  
>Rlaevigata\_31  
ATCATCATCATCATGGGGATTGTCTCCTGATTCTTCTCTGTGCTTTTCCGGTGGCTAGTGCAGCCAACACATATGATT  
ATCTCCAAGTACTGCTGAGTGGCCAAACACGTAATCTACCAAAACTGCATATCAAACCTGCCACTCGACTTCAC  
CATAATGGGTTGTGGCCTAGCAATTTCTCCGGCCAAAACAACCCATGTGTGGGCACGCCATTTAATAGAGCTCAG  
>Rpersica\_16  
AGATCCGGATGGATCCAACCAACCAACTGCTCGCGCCTCCGAGCTCGAATCCGCCCCAAGAAGACCACGCAACAACA  
CCATCCATGCCACTGGCCAAACAAACCACCGCCACCACCTACCTCTCCTACAAACGAATTGGACAACGAACCCATCAC  
CACAAAATCTCCACTT  
>Rpersica\_18  
TCATCATCATGCGAATTGTCTCCAGATTTATTCTCTGTGCTTTTGGAGTTGCTAATGCAGCTAACACGTATGATTACC  
TTCTACTAGTCTTCAATGGCCAACTGCATTATGCATTAACCAAAAAGTGCATCCCAAATTTCCCTTTGGACTTCACTCT  
ACATGGGTTATGGGCAATCAATATCTCTGGCCAAAACAACATTTGTGTTG  
>Rxanthina\_10  
ATGTTAATGCAGTGGCCAGGATCATTTCTGTGATACACAGAAAAGTTGCTGCTATCCAACCACAGGGAAGCCTGCAGCAG  
ATTTTGGGATTCATGGGCTCTGGCCAAATTACAAGGATGGTTTCATACCCTCAAACGTGATCCAACAACCCCTTTGA  
TCAATCTCAG  
>Rxanthina\_15  
ATGGGGATTGTCTCCTGATTCTTCTCTGTGCTTTTGGGGTTGCTAGTGCAGCCAACACATACGATTATCTTCAACTAG  
TCCTGCAATGGCCAGACACGTAATGCATCAACCAAAAAGTGCATATCAAATCTCCCACTAGACTTACCATAACATGGGTT



>Rminutifolia\_24  
GTTCTCAACGTTTTCAAATGCTGAACCCTACGAGTACATGCAATTTGTACTCCAGTACCCACCTGGAGTTTGCTATGACA  
AATCAAAAGGTGATTGCATCTCACCTCTCCCAACCAAGTTTCATGTACATGGAATATGGCCTTCTAACTTCTCCAATAT  
ACTTGTCCGTTGTGGGCACGCACTGACGAATAACCCCTTTCATAAGGCGCAG

>Rminutifolia\_26  
ATGGGACTATGCTTGTCTGCTAGTATTGGCATTGATGGCACCCCTCCGTCAACTCAAAATATCAGTACACCCAGCTTG  
TCCAAATGTGGCCGCCGGGTCAATTGTCATTTCCACCACATTGCACTGCACCGATACCTCGGAACTACTTTAGTGTGCA  
TGGCTTATGGCCAAGTAATCACAGTGTGCCAAGATTACATACAAGAATGTATATGTTCCCTTCTCCGGAACACTG

>Rarvensis\_6  
TCCTATGAATATTTTAAATTTGTGGTACAATGGCCACAAGCGCACTGCCGCATTAAGATGCAAACCCCAAGCCTTGC  
AACAGAAAATTTACACCATCCATGGCCTATGGCCAAGTAATTATTCGAAATCTCCTGTGGAGTACTGCATGGCATCGCC  
ATTTCAAATCCGGTAGGT

>Rarvensis\_9  
AGCTGCTATAGTAGAAAACCAATGTGCCATCATCACATCATATACTTGAATCCAAGCTTGCTTGTATAATCATTGATT  
CAATCATGGCTGCTTTGAACCGTATTACTCCGCTTGCTATACTCTGCTACTTGTAGCTGCTTTTTGTGTTCCCCCGGC  
ATCAGCCAAAACAAGCTATGAGTATCTGATGCTCGTTTTACAATGGCCATTTGCTGTCTGTGCAAGCAAAGTTTGCACC  
TACAAATATCCTCCTGATAACGAATCTTACTTTCATGGCCTGTGGCCAGCGAATTTTTTCAGGTGCTCAGTTACAGTGCA  
GCGGTACCCCTTTCGATCGCAGCGAGGTATATATATTA

>Rarvensis\_14  
CTGTTCAAGGGTTCATGCAGAGCCATACGAATACCTACAGTTTGTCTTGCAATACCCTAGAGGTTACTGTGTTAACG  
ACAAGAAATGCATTCCACCGGCGAGCTTGCCAGTCAAATTCACGGTTCATGGAATTTGGCCCACGAATATTTCC

>Rarvensis\_15  
TTAATTTATTTGCATTTAACGTTCTTTCTTCTCTCAATAATATCTACAGCGAGCTACCAATATTTTCAGTTTGTGCAGC  
AATGGCCACCAAACCTTCTGCTATGGTAGATATCGTCCTTGCAATAGGCAATCATTACCATTTCATGGCCTGTGGCCAAA  
TAATTTTTTACAAGTTAATTACAATCATATTTGTTCCGGGGCCGCATTTAACAATCAGGTACTCGATCTA

>Rarvensis\_18  
TCAACTCAAAATATCAGTACACCCAACTTGTCCAAATGTGGCCACTGGGTCACTGTCATTTCCACCACATTGCACTGC  
ACCGATACCTCGGAACTACTTTAGTGTGCATGGCTTATGGTCAAGTAATCACAGTGTGCCAAGATTACATGCAAGAAT  
GTATATGTTCCATTCTCCGGAACACTGGTTTAAACTT

>Rarvensis\_22  
CAACAAAGCAGGGTGTGCTACCCAAAAGAGTATTAGAAAACATCCAGTTTACAATTTGGTGGCATATGGCCTTATA  
CTTTTTCTGGGGATAGACCAACCTACTGCAAATCTAAGACCCCTTTT

>Rarvensis\_23  
GATTACCTTCTACTAGTCCTTCAATGGCCAACTACATTCTGCATTAACCAAAACTGTATCCCAAATCTCTCGCTAGACT  
TCACTATACATGGGTTATGGCCCAGCAATATCTCTGGCCAAAACAAACCTTGTGTTGGTACACCATTTCGATAGAGCTAT  
ATATATATATATA

>Rarvensis\_29  
CTACTAGTCCTTCAATGGCCAACTACATTATGCATTAACCAAAACTGCATCCCAAATCTCCCACTGGACTTCACTCTAC  
ATGGGATATGGGCCAGCAATATCTCTAGCCAAAACAACCTTGTGTT

>Rarvensis\_32  
TTTCAAACCCTAAAAGATAGTTTCTCGTTATTTAACATGCATTTTGATGAATCGATGCAGTGGCCTGGAGCATATTGCG  
ACACAAAGCATAGTTGTTGCTATCCAAAGTCAGGGAAAGCCTGCAGCAGATTTCCGCATTCACGGTCTCTGGCCAAACTA  
CAAGGATGGCTCTTACCCTTCAAACCTGTGATCCAGACAGTGTCTTCGACAAATCTGAGGTACACGACACCTATACTTTA  
ATCAACATATATATAACCTTAGTTTTTGGGA

>Rarvensis\_34  
TTTCATATGGCACAAAATAATATGGCTTACGTCTCATGACCTGCACTACTGTTGCCTTACTCTTTACTCTGGCCTCCT  
CGTATACGGCCTACGAATACTTCTTGTGTTTCAACAGTGGTCCAAGACCGTTTGTGGTAAACAGCTGCAAAGCTCCCTC  
TCCAGTTTTTACGATACATGGGTGTGGCCCTCCAACCACACTGGCCCTCAGCTGAAGTGCCTGCTGGTGCAGCATATAAT  
CCCACAGAG

>Rarvensis\_35  
ATGGGGATCATGCAACTCGCCCTGCTCCTTCTCTCTGCGTGGGGGGCAGCTGATGCAGCCAATCCCTACGACTACCTCC  
AATTCGTCCAACAGTGGCCTGCTACATTCTGTTCCGGCAGGTGAGATTGTATCCCAAATCCCCCGCAGAATTTCTTTAC  
AATCCACGGCCTTTTTTTTTTTTGGCAAAGAGTATTTGAGAGGGGGGAGGCAG

**Supplementary File 4**

>Rmultiflora\_sc0006888\_F\_box\_minus4

ATGGTGGTACAAATCTTATCCAGAATGCCTCCGAAATCTCTAATGCGATTCAAGTGCATTCATAAGTCATGGAACTCTA  
TGATCAATAGTCGCCATGTCTGAGTAAGCATCTCCAGTTTCACAGCAACCTATCCTCCTCCACTAGCATCCTTCTAAG  
GCGTCTGTCTGAGGAAACCGAAACTAAGAATGAGGAAATCGTTTTTTCTTTGCTTACTCTTTGCAACGAGAATAAT  
GGTGATGAGGATAACCTAGATTATGACATCGAGGACATCCACTTTCCACCTTCAATTGGTCTAAAAACTAGGGCACAAT  
TTATTGAGAATCCTGGTCCAACCTTATGAATGTGCAGATATTGTGGGTCAATTGTGGTGGGATAATCTGTCTCTCTTTA  
TGCTGCAGGCGACCTTGTCTTATAACAATCCCGCAATTAGGGAATTC AAGGTTATACCCGAGCCATGCCTCCCACGTCCC  
CGTCAGTTTTATTTCCGTTGTGATGCATTTGGTTATGATCCCATTTCTGAAGATTATATACTTGTTAACGTTGCAAGTT  
ATGGTGAAAATAGATACGATGATGATCGTCTCGTTATTGAACCTCTGAGAGCAGAGATGTACACACTGGGTACTGATTC  
TTGGAGAGAGATCAAGATTCACAATTTGGAAACCGAAACTACCATGTTTTCGGCCTAATCATTTCCAGGTGATTTCAAG  
GGAACTGCTACGGGTTGGCAGAAGAAATCAAGAAGGAATTCATCTCATCGTTTGACAGTCTTGAGGAGTATTACATTA  
GGGAAGTAATCGTTTTGGTTTAAACACGAGCGATCGGGTTTTCCATAGTGCATTGACTCCTGATTGTTTGTATCGATATCC  
AGCGCATGACTTCACTCTTACAGTGTGGAACAATTGCGTTGCTTTTTTTGGCTATAATCGTTGTGGAAGTAAACCATTT  
GAAATTTGGGTGATGGGTGACTCTGATGGTTTTCACTTGTTCATGGATAAAGCACATATCGGTTAACATTACGGAACTCTC  
CTCAACCATTGGTACTGTGGGAGAGCAACCAGAGTCTTTTTGGTGTCCCCGCGTATACGAGTAGCCTTGTACAGCTTTGC  
AACCAAAACGTTTACGGTATTTACCCTATGTGCTGCTGAACATTTTCGATGCTATACCTCTTGTGAATAGTATAGTTCCA  
CTCAATAGGGACCCAGTTTTGTGTTGATATTTCT

>Rmultiflora\_sc0006888\_F\_box\_minus3

ATGGCAAATATAGCAAATGTATGCGTCTGAGGACTTTGTGGAGCAAATTTCTATTAGAAGTGCCTCCCAAACCTTTGA  
TGCGATTTAAGTGTGTATGTAATCTGTGGTGCATTTAATCAAAAGCCCTAGTTTTCGTAGATAAACACATTTCCAGTTC  
TATGCGAGGATCCTCTATGCCCATCCTTATCAAGCGCCAGTTCACCGGACAAGGACAATAACATTAAGGATGAGAAG  
AAAGTTGGGAATGATGACGACGATGTCGAAACTCTCTTGACGTCACCTAATATCTGCAATGAGGATGATGATGATTACC  
CTCTATCAACTGTAGTTGAGGATCTTAAACGTTCCGCTTCCGGCTCCTCTGAAGCTAAAAACATTCCTCGGATCTCACAAT  
TGCAGGTCATTGTGATGGAATCATTTGTTTTAAACTTTTTCACTGGTAAACGTTATTTTTATGCAACCCAGCTATAAAGGAA  
TTCAAGCTTCTTCCCAAGTCTTTTTCTTCTCCTTTGCAATGATAACTTTGATGATCCCTGGTTCGCTTTCTTATGAATTA  
GATATTACAATGAATATTTGGGATTTGGCTATGATCCCAAAGGTAAAGATTACAAGGTTGTTAGATTTCGTAATCTATAA  
TGAGTCATGTTGTTGGTTCAAAGCAGAAGTATACACTACGGATTCTAATTTCTTGGAGAGAGATCAAGTCCGAATATGAT  
GGTAAAACTTTTATTGTTAATTGGTCTTCTGATATGCCTTTATACTTCAACGGAATTTGTTATTGGCACGTAAGTTGTG  
CACACCTGGAATCTGTTCTTTTCAATTTGATATGGATAAAGGAGCTATTTTCATGAGATATTGATTCAGATTTGCCAAACGG  
ATGTAGAGTAGTGATGCTTACTATGTGGAAGAGCTCATGCTTTTTTTCACCTATCAAGAAGAAATTGGAGTTCCCTCAA  
TCTTACGATATGTGGGTGATGATGGATGATCTTAGTGATGGTAAGGGTTCATGGACAAAACATTTAACTATAGGACCTG  
TGGAAGGTGTTAAATTTCCATTGATATTTTGGAAAAATGACCAACTTCTTATGGTTTCTAATAACGGAAGTATCGTCTT  
ATATAACCTTGGCATAACAGAGATTAACCTATCTTCCATATTCATTCATGAGAGATCTTTACTATAGTCAAGCACTTGT  
TATGTAAATAGTATTGTTTCCATCAGCGGAGGCAATGTACTTGAAGATATATATATTTCTGCGTTTTTATGGCAATGGAA  
AATTTCAATCCATCAACGGACGAGACATAGTAGATATTTCCGCTTTTTTATGGCAATAGCGAGGAACAAGTCTCAGGTT  
ACCCCTTAGG

>Rmultiflora\_sc0006888\_F\_box\_minus2

ATGGCGGTAGAAATCTTATCCAGACTGCCTCCGAAATCTCTAATGCGATTCAAGTGCATTCGTAAGTCATGGAAATCTC  
TGATCAATAATGCCATTTTGTGGCCAAGCATCTCCAGTTTCAACAACCGTATCCTCCTCTACTAACATCTTTCTAAA  
ACGTCGTGTCATCAGGGCAACTGAATATAGGGATGAGGAAATCGTATGTACGTTACTTACTCTTCGCAATGAGAACAAT  
TGTGCTGAGGACAACATATATTATGATATCGAGGACATCCAAATTTCTCCTTCAATTGGTCTAAAAAGTAGGGGACAAT  
TTATTGAGATCCCTGGTCACTGCTCTTATGATTGTGCATATATTGTGGTCAATTGTGATGGGACATTTTGTCTAACTCT  
TTATAACCGCAAGCGACCTTGTTTTATAACAATCCAGCAATCAAAGAAGTCAAGCTTATACCAGAGTCATGCCTTCGAGAT  
AAGTTTATCGGTGCTGTAGGATTTGGCTATGATCCGAAGTCTGAAGATTACATACTGGTTAGCGTTACACGTTATGGT  
AAGAAGCATAACGATGATCGTGTGTTATTAATCCTCTGAGAGCAGAAATGTACACACTGGGTACTGATTCTTGGAGGGA  
GATCAAGATCCACAATTTGGAAACCGAAACTACTTTTTTTGGCCTGCACATTTCCAGGTGTACTTTAAGGGAAATTTG  
TACTGGTTGGCATATGAAAACCGAAGGAATTCATCAGTTACTTGGACAGACTTGAGGAGCAATATATTAGGGACGTCA  
TCGTTTCGTTTGACACGGGCAATCAGGTTTTCCATACTATATTGGTTCCGGATTGTTGTATGAATATCCAACGCATGA  
ATTTTACCTCACAGTATGGAACGAATCAGTTGGTCTTTTTGGCTTTTATCGTGGTGGAAATAAACCTTTGAAATTTGG  
GTGATGGATGATTCTGATGGTGTAACTCTACGTGGATAAAACACCTATCCATTGACGTTGTGGAACCTTGCTATACCAT  
TGGCACTCTGGGAGAAAAATGAGATTTCTTTTTGGTCTCCACATGGACACAAGTATCCTTGTACAACCTTTGTAACCTGAAA  
GTACATGATTTACCCTTTATGTTGCGCTTTATTTTCGAAGCATTTCCCTATGAACCTAGTATAGTTCCACTCAAGAGG

>Rmultiflora\_sc0006888\_F\_box\_minus1

ATGGTAGAGTTGTGCAAGATGTCAGAAGAGATAGTGGTGCAAATGTTATCAAGGACGCCTCCTAAATCTCTAGTGGGAT  
TCAAGTGTATCCACAAGTCATGTTATTTCTATGATCAATGATCCACAATTTGCGACCAAACATCTTCACTTTTTATAACAA  
TCCATCTTTCGTTCCACTGCCTTCTCCTGTCAGCGTCTGTCATCCTCAGAAGTGAACGAGCAATGAGAACGTTGTACTC  
TCATATCTTCGTTCTAGAAAATTATAGTAATGGTGACGATGAAGATCTTCAATTTTCGTAAGTTGAGGACCTCATTTTCCCAC  
CTTTTAAAGGGTCTAAAAACTAGGGGACAATTTATTGAGCTCCCTGGACGTGATGATTCGTGTATATCATTAGTCACTG  
TGATGGCATTATTTTTCTAAGTCTGTATGCTGGCGACCTTCTTTTTGTACAATCCAGCAATCAAAGAATTCAGATTTAT

CCGGCGTCATGTTGTCAAGATTGTTTTTGGAGCTTGGTGGGATTCGGATATGATCCGAGATCCAAAGATTACATTATTC  
TAGAAATTGCATGTTATGGTGAGACAAATTGTGACCATCCTCAGCGTCTCATTGTTGATCCTCCAAAAGCTGCAGTTT  
CACACTAGGCATTGATTCTTGGAGAGAGATCCAGACTGATTACTTACAAACTGAAGATACCTACTTTTGGCCTACGGCA  
TTCGATTTGTACTCGAAGGGAATTTTGTATTGGTTTTGGTTATGAGGAAAAGAAGGAGTTCTTGGATGACATGAAAAGAT  
GTGAGGAGACAAACAAGCAAGTGATGATTTTTGTATGATACGGTAGATGAGCTATTTTCATATTGCAATGCTTCCGGATAG  
TTTTCAACGAGCCTGCTTGCGGCATAACATGATATTCATCTTACATTGTTAGATAAATCAATTGCTCTTTATGGTTTTAGC  
ATTTTTGAATCGATTCAATCCATTCAAATATGGGTGACAGATGACATTAAGAGGAATCTTGGACAAATTACTTGTCCCT  
TAGAGCCGATAGATGCTGTTCCGAGGTCAATGGCCTTTTGGAAAGATCAACAAGGTTCTTATGATTGCCAAAGATGGGCG  
TGTAAGTCTCTACAATCTGGTTACAGGAAAGCTCAAGCATTTTCCATTTCATGGCCTGCACCTAGGAGATGATATTCAA  
GGCATTGTTTTGTATGGATAGTATAGTTTTCAGTTATGAGAAAACAA

>Rmultiflora\_sc0006888\_F\_box\_plus1

ATGACAGAGTTTTCTAAATTTCTGAAGAGATGGCCTTGCAAATCTTATCAAGGATGCCACCTAAATCTCTGATGCGAT  
TCAAGTGTGTCCGTAAGTCATGGTATACGTTGATCAACAGTCCCAGCTTCGTATCCAAACACCTCTTTAATTCCTTGCA  
CAACAAACAGTCCACATGCATCTTTTGAAGCGTTACGTCTTCAGGGATATCGCAACTAAAGATGTGGAATCTGTAATC  
TCATTGATTACTTTTTCCAATGATGATGTTGGCGATAATGACCATGAGCATATCTCTCATTCCGGTTATCCAAGACATCG  
ATCTTCCACTTTCTATGAGTGGAGTACCGAAGAACCATGTCAATGAGCCTGAGCTTCTCGGAGCTGTATATATTACAGG  
GCATTGTGATGGAATCATTTGTTTAGTCCATGGTGAGATTGTGCTATGGAATCCAGCAATTAAGCAATTAAGGTTCTT  
CCCAAGCCACTCCTTACAAATGGGATCGTAAATTTCTATAGGATTTGGCTATGATCCCAGATCTAAAGATTACCAAGTTT  
TTAGTTTTCCGACTCATGATGAGGACCGAAGTACGAGCGTGATTTTAATTATCCTCCACAGGTTGAAGTATACAGCCT  
CAGTACCGATTCGTGGACAGAGATCAACGCCGATCATTTAGAACTGAACTACCAACTTGTATCCTGAATATTTTCAA  
ATGTGCTTTAAGGGAATTTGGTATTGGACCGGAAGTGAGCAACAAAAGGAATTCATGGTTGTTTTATGATAGTATGGATG  
AGGAATGGGTGAGGACAGCTGATCATTGTGTTTTGATATGAATGATCAAGTATTTGAAGACATACTATTTCCATATAGTTT  
ATACCACCCGATGATTCCTTATTTAGAAATGCGCGTTATTGTGTGGAATGAATCCGTCGCTCTTTTTGGTCAGTACCGT  
TTTTGGTTATGCTGATGATGCTTTTTGGATTATGGGTAATGGATGATATTGTCAAAGGTTCTTGGACAAAACAATTAACCC  
TAGAGGTCATAGTTGGTACTCGAATGATTTTGGAAATGTGGAAGAGCGACGAGATTCTTATGGTGGCTAATGACAACCG  
TATATTCTCCTACAATTTCAGAACTGAAAAGATTAATTTCTTCCATTGAAAAGTACGCATCCAACCTTTTTCCGCAGCT  
ATTGTATGCATAAACAGTATAGTTCCGGTTATTCATGGGAGGCAGCAAGCA

>Rmultiflora\_sc0001861\_F\_box\_minus3

ATGACGGAGTTCTGCAAATGCGGGAAGAGATGGCCATGCAAATCCTATCAAGACTGCCCTCCCAATCTCTTATGCGAT  
TCAAGGGCGTCCACAAGTCCTGGTATACTATGATCAACAATCCCAAATTTATAGTCAAGCACCTTTCCAATTCATGCA  
TAACCATTCCTCCATTTGTGTCTTTTTCAAGCTATCGGTCTCAAGAACAACAACAAGAGACAATGACGAGAAGGAA  
ACTGTATTCTCGTTGCTTACATTTTGAATGATGATGATCAGAAGGAGCATATCATTCAATTATGTTGGCGATGATA  
TTACGAAGAATCACTTTGTTGGGCTCAAGGTCAAGGATCTAGAATCTGTATGGATTATAAGCCATTGTGATGGAATTA  
ATGCCTAGCTGATTCTAGTAACGTCATTTTATGGAATCCAGCGCTTAGGGAATTAAGCTTCTTAACCTCGATCCTTAT  
CCGGATCAGGTCATGACTTCTTTGGCTTCCGTTATGATCCAAAGTAAAAGATTACAAGGTTGTCAACATTGGAAAGC  
CTGGTGAGCAAGAATATGGTGACGGTCATCTGCTTAATAATCCTCCCACCGTCCAAGTATACACCTTAGGTAACCTA  
TTGGAGAGAGATCAAGACCGGCTCCTTGGAAACAGAACTACGAATATGTGGCCCCGACGAATTCGATATGTACTTTAAG  
GGATTTGTTATTGGAGGGGAAGGGAGCAAATCAAGGAATTCGACAATTTTTGTGACAGAAATGAGGAGGAATATGTTA  
GGCAATTAATCATTTCGTTTGATACGGTTGATGAGGTATTTTCATCATATATTGTTTCCGGATAGTTTATATCAGTCATT  
TGCGTGTGGTATTCTAATATGAACGTTATAGTTTGAATGAATCGGTTGCTCTTTTCCGGATGGATTATGGTATATTC  
GAAGATTATTCACGGGTATTATGGGTGATGGAAGACTTTGGTGGAGTAGCTAAAGGTTCCCTGGATAAAGCAATTCACCT  
TTGGGACAGCAGCGGAATGAGAAACCATTGCAATTTTGAATAGGGATGAGATTCTTTTGGTTTCCGAAGGGCGTTT  
AGTCTCCTGCAACATCGATACTGAAAAGCTTAAGCATCTACCCATTCTAACATGGATTTTGTATCATTGGAAGCTGCT  
GTTTATGTTAATAGCATAGTTGGAATT

>Rmultiflora\_sc0001861\_F\_box\_minus2

ATGACAGAGTTTTCCAATTTCTGAAGAGATGGCCTTGCAAATCTTATCAAGGATGCCACCTAAATCTCTGATGCGAT  
TCAAATGTGTCCGTAAGTCATGGTATACATTGATCAACAGTCCCAGATTCGTATCCAAACACCTCTTTAATTCCTTGCA  
CAACAAACAGTCCACATGCATCTTTTGAAGCGTTACGTCTTCAGGGATATCACCACTAAAGATGTGGAATCTGTAATC  
TCATTGATTACTTTTTCTATGATGATGATGTTTTGTGATAATGACCATGAACATATCTCTCATTCAAGGATTTCAAGACGTTG  
ATCTTCCACTTTCTATGAGTGGAGTACCGAAGAACCATGTCAATGAGCCTGAGCTTCTCGGAGCTGTATATATTACAGG  
GCATTGTGATGGAATCATTTGTTTAGTCCATGGTGAGATTGTGCTATGGAATCCAGCAATTAAGCAATTAAGGTTCTT  
CCCAAGCCACTCCTTACAAATGGGATCGTAAATTTCTATAGGATTTGGCTATGATCCTAGATCTAAAGATTACAAAGTTT  
TTAGTTTTCCAACCTCATGATGAGGACCGAAGTAGCGAGCGTGATTTTAATTATCCTCCACAGGTTGAAGTATACAGCCT  
CAGTACCGACTCGTGGACAGAGATCTACGCCGTAATTTAGAACTGAAACGACCAACTTGTATCCTGAATTTTTCCAA  
ATGTACTTCAAGGGAATTTGGTATTGGACCGGAAGTGAGCAACAAAAGGAATTCATGGTTGTTTTATGACAGTATGGATG  
AGGAATGGGTGAGACAGCTGATCATTGTGTTTTGATATGAATGATGAAGTATTTGAAGACATACTATTTCCATATAGTTT  
ATACCACCCGATGATTCCTTATTTAGAAATGCGGGTTATTGTGTGGAATGAATCCGTCGCTCTTTTTGGTCAGTACCGT  
TTTTGGTTATGCTGATGATGCTTTTTGGATTATGGGTAATGGATGATGTTGTCAAAGGTTCTTGGACAAAACAATTAACCC

TAGAGGTCATAGTTGGCACTCGGATGATTTTGGAAATTTGGAATAGCGACGAGATACTTATGGTGGCTAATGACAACCG  
TATATTTTCCCTACAATATCAGAACCGAAGAGATTACATATCTTCCCATTGAAAGTACGCATCCAACCTTTTTCCGCAGCT  
ATTTTATGCATAAACAGTATAGTTCCGGTTATTCATGGGAGGCAACGAGAA

>Rmultiflora\_sc0001861\_F\_box\_minus1

ATGGTGGTACAAATCCTCTCCAAACTGCCTCCAAATCTCTAATGCGATTCAAGTGCATTCATAAGTCATGGAATTCTC  
TGATCAATAGTCCCATTTCGTCGCCAACATTTCCAGTTTCAGAACAACCAATCATCTTCCACTACCATCCTTCTAAA  
GCGTCTGTAAACCGCAGCACTGAAACTGTGAATCAGGAAATGGTTATTTTCGTTACTTACTCTTCGCAATGAGGATGAT  
GGAGATGAGGATAACCTTTATTATGATATAGAGGACATCAAATTTTCGCCTTCAATTGGTCTAACAAGTAGGGGACAAT  
TTATTGATACCCATGGTCAAACCTTATGATTGTGCAAAAATTTGTGGGTAATTGTGATGGGATATTTTGTCTCTCTCTTTA  
TACTGCAAGAGACCTTGTTTTATAACAACCCATCAATCAAGGAATTCAGCTTATACCCGAATCATTCTTTTCGAGATAAG  
TATTCAGGTCCCACGGGATTTGGGTATGATTCCAAGTCTGAAGATTATATACTTGTAGCGTTGCACGTTTTGGTTTGC  
AAAAATACGGTGATCGTCTCGTTATTGAACCTCTGAGAGCAGAAATGTTACACTGGGTGGTGATTCATGGAGAGAGAT  
CAAGATTAACAATTTGGAAACCGAAACTACTATGTTTTGGCCTTACCATTTCCAGATGTATCACGCGGGAAAAGTGTTAC  
GGGTTGGCACATGAAATCAGGAAGGAATTCATCTCTTCGTATGACATTCTTGAGGAGCATTACATTAGGGAAAGTGATTG  
TTTTGGTTTGACACGAGCGATCGAGTTTTCCATAATACATTGGTTCCCTGATTGTTTTGTATGAATTTCCAATGCATGACTT  
CAGCCTTACAGCGTGGAAACAATTCGTGTTGCTCTTTTTCGGCTATAATCGAGGTGGAAAGTCTACCCTTTGAAATTTGGCTG  
ATGGCTGACTTTGATGGTGTTCATTCATCGTGGATAAAGCATTATCCATTGAAGTTGGGGGATCTCGTAGTTTTAGGTC  
GCAAAGCATTACACCATTGGCACTTTGGGAGAGCAATGAGATTTCTTTTGGTTTCCACAGGTACAGGAATAGCGGCATA  
CAACTTGGTAACCGAAAGGTACAAGTATCTACCCTGTACGGTACATGGTATATTGAAGCTTTTCCCTTATGTAAGTACG  
ATAGTTCCCTGTCAAACGAGGTAATAAGTTTTGAGAACGAGGATATT

>Rmultiflora\_sc0001861\_F\_box\_plus1

ATGGTGGTAGAAATCTTATCCAGGCTGCCTCCGAAATCTCTAATGCGATTCAAGTGCATTCATATGTCATGGAATTCTA  
TGATCAATAGTGCCCATTTTGTGGCCAAGCATCTCCACTTTCACAACAACCTATCCTCCTCTACTAACATCCTTCTAAA  
ACGTCGTGTCATCAGGGCAACTGAAACTAGGGATGAGGAAATCGTATGTACGTTACTTACTCTTCACAATGAGAATGAG  
TGTGATGAGGACGACGTACATTATGATATCGAGGATATTCATTTCCCTCCTTCAATTGGTCTAAAAAGTAGGGGACAAT  
TTATTGAGATCCCTGGTCACTGTTCCTTATGATTGTGCATTTATTATTGGTCAATTGTGATGGGATATTTTGTCTAACTCT  
TTATAACCGCAAGCGACCTTGTTTTATAACAATCCAGCAATTAAGAAGTCAAACCTCATAACAGAGTCAGGCCTTCAAGAT  
AAGTATATAGGTGCTGTAGGATTTGGCTATGATCCCAGTCTGAAGATTACATACTGGTTAGCGTTGCACGTTATGGTG  
AAGAAGCATATGATGATCGTGTCTTATTAATCCTCTGAGAGCAGAAATGTATACACTGGGTACTGATTCTTGGAGGGA  
GATCAAGATCCACAATTTGGAAACCGAAACTACTTTTTTTGGCCTGCACATTTCCAGGTGTACTTCAAGGGAAATTTGT  
TACTGGTTGGCATATGAAAACCGAAGGAATTCATCAGTTACTTGGACAGACTTGAGGAGCAATATATTAGGGACGTCA  
TTGTCTCGTTTGACACGGGCAATCACGTTTTCCATAGTATATTGGTTCGGGATTGTTTGTATGAATTTCCCTACGCATGA  
ATTTTACCTTACAGTGTGGAACGAATCAGTTGCTCTTTTTGGCTTTTATCGTGGTGGAAATAAGCCCTTTGAAATTTGG  
GTGATGGATGACTCTGATGGTGTAACTCTTCGTGGAGTAAACACGTATCCATTGACTCTGTGGAACCTGCTATTCCTC  
TGGCACTTTGGGAGAGAAATCTTTTGATCTCCACGTGGACACAAGTAACCTTGTTGAGCTTTCTAACTGAAAAGTACAT  
GTATTTACCGCTTTATGGTGCCTTTATTTGAAAGCTTTTCCCTTATGAGCATAGTATAGTTACAGTCAAGAGG

>Rmultiflora\_sc0001861\_F\_box\_plus2

ATGGTAGGGTTATGCAAGATGTCAGAAGAGATAGTGGTGCAAATGCTATCAAGGACGCCTCCAAATCTCTAATGCGAT  
TCAAGTGTATCCACAAGTCATGGTATTCATGATCAATGATCCACTATTTGCTGTCAAACATCTTCACTTTTACAACAA  
TCCATCTTCCCTCTACTGCCTTCCCTCGTCAAGCGTCCCTGTCATTTTCAGAAGTGAACGAGCAAAGAGAAGCTTGTACTT  
TCATATCTTCGTCTAGAAAATTATAGTAATGGTGCAGATGAAGACCTTCATTTCATAGTTGAGGACCTCATTTTCCCAC  
CTTTTAAAGGTATAAGGACTAGGGGCCAATTTATTGAGCTCCCTGGACGTGATGATCTGTGTATATCATTAGTCATTG  
TGATGGCATTATTTTTCTTACTTTGTATGCCGGCGACCTTGTTTTGTATAATCCAGCAATCAAAGAATTCAAGATTATT  
CCAGCGTCATGTTGTCAAGATTGTTCTGGAGCTTGGTGGGATTCGGATATGATCCGAGATCCAAAGATTACATTATTC  
TAGAAATTCGCGTGTATGGAGGGACAAATTATGACCATCCTCAGCGTCTCATCGTTGATCCTCCTAAAGCTGCAGTTTA  
CACACTAGGCATTGATTCTTGGAGAGAGATCAAGACTGATTACTTACAACCGAAGATACCTACTTTTGGCCTACAGCA  
TTCGATTTATACTCTCAGGGAATTTTCTATTGGTTTGGTTATGAGGAAAAGAAGGAGTTCTTGGATGACATGGAAAGAT  
GTGAGGAGACAAACAAGCAAGTATGATTTTGTATGATACGGGAGATGAGCTATTTTCATATTGCAATGCTTCCGATAG  
TTTCAATGAGCCTGCATGCGCGTACATGATATTCATCTTACATTGTTAGATAAGTCAATGGCTCTTTTATGGTTTTAGC  
ATTTTTGAATCGATTCCCTTCAATTAAGTTGAGGATGACATGACATTTCGAGAGGAATCTTGGACAAAATACTTGTCTC  
TAGACCGGTAGATGCTGTTCCGAGGTCATTGGTCTTTTTGGAAGATCAACAAGGTTCTTATGATTGCCAAAGATGGACG  
TGTAGTTCTCTACAACATCGTTACAGGAAAGCTCAGGTATTTTCCCTATTTCATGGCCTGCACCTAGGAGATGATATTCAA  
GGCATTTTTTGTATGGATAGTATAGTTTTAGTTTGGGAAAACAA

>Rchinensis\_NC\_037090\_F\_box\_minus4\_1507747\_1509120\_

ATGATTTTCGACAAAACGAGGTTTGATAACAAATCTCTGGTCTGTAAGAAAAGATTTGGTATGGTGTGGGAAATTTTT  
TTTTCAAACATATGCAGCAATCTTCTATGGTTGTTGAAGGCTTGTACGTTTTTCGATAAAAAGACGTGATAATGAGAACGA  
GGGAAAAGACTTTAACATTGACGAACCTACCAGGAGATGTCACCATCGACATCCTTATGAGACTGCCGGTAAAATCACTT  
TGTTGCCCTCGAGTGTGTCTTAAGACCTCTTTGAACATAGTGGCAGCCCTCAGTTTGTGTCACAGCACACTCGACGTT

TATTGAACTCGTCTTCTGCAGTTGAAGTGCCTCAACTTATGCTTCTTGCACGATACTCTAATCTGCAGCATTGTGCAAT  
AAATTTGCAGTCATTGAAGTACAATGGCACTAGCTGCTCGACGAAGACCAATTTTGTCTGATATCGTTTTTCATGAACGAT  
TGGTATAGGTACGAGGTAGAATTTGTCTTCAGCAATTTGTTTGGAAATTAGTAGGAGACTGAGTGTAAATAGAGAGCTGT  
GCTACTTGGTCAATCCTCTTAGGGGAGAAGTCTTAGAGCTCCCGAGAAGTGATGTCAAAGCTCCAAACTATAATGGATA  
TGATCCATGCATTCATGACCGGTACGGAATGGGATTTGATCATGTAAGTAGTACCTACAAGATTGTTTCATATTTCCGAA  
TATGCCATGAAATTTCCAGCGACATAGCCGCCGAGTTTATGCGATGGGAACAAGATCATGGCGACCGATACAATCAG  
TTCTCTGTGTCAATTTAGCAACAAGAGTGTATATGCGTATGGTGACAGGCATTGGTTGGTTGAAGGTGATAAAAGCCC  
CAATAATTTTATTGTTTTCTTCGATTTAGAAAAGATGAATTCTATTGGACTCACCATCCCGACTTGCAGGCTTCTTCT  
TCTCACAGATTTTGGTATGATTTTCATTTGCTTAATCTCAAAGGATCTTTAGCCATCATGGATTATTGTTTCATATCCGG  
AAGAGTATATTAAGATATGGGTGCTGAAAAATTATGACAAAAAAGAGTGGGCGCTAGATTACACAATAAACATGAAAAC  
GTTTTGTAGGACGGCTAGGGGCACGTTATTGAAATGGGGTGAATGGGAAAATGGCATTTTTACCATTCAAAGTGGTGT  
TGCTACTTTGTGGATCTCAGACGTGGTTCCATGAAAGGAGTAAAACCTGCCCTCCAGCATCATGAATTACAATCTTTGGA  
CCGCAGAGCAATACGAACAAAAGTATATTCAGTTATACAGGAAGTATGGTTTTCCCTAAAGAATTATGGCAATTTGATTGA  
AGCAGCAAGACCAGGCATGTGGTTTTCTACAG

>Rchinensis\_NC\_037090\_F\_box\_minus3\_5375622\_5376560

ATGTCTGAAGAGATTATGGTGTCAATCCTATCAATATTGCCTCCCAAATCTGTGATGCGATTCAAATGCGTGCGTAAGT  
CATGGTATTCCCTTGATCAACAATTTCTAGCTTCATAGCAAAGCACCTTTCTAATACCATGTGCAATAAACACTCCACATC  
CATCCTTTGCAAGAGTTGCGTCTCAGGGATATCAACACCGACGAGAAGGAAGTTGTCTGCTCATTGATTTCTCTTTCC  
AGTAATAGCAATAACGATGAGCATCACATTCATTCTGCAGTCGAGGACATTCACATTCGCTTTCTTTTGGTGTAACCA  
CAAGGGGCCAGTTCAAGGGGGATGAAGTTCTATTAGCTGTATCTATTATAGGGCATTGTGATGGAATTATTTGTCTAGT  
AGCTTCTTTGAACATTGTTTTATGGAATCCAGCAATCAAGGAATTCAGATTCTTCCCAACCAGTGCCTTCCAAATGGG  
ACTCTAAATTCGATGGCATTTTGGCTATGATCCCAAATCTAAAGATTACAAATTTTTAAACATTGTGGATCCTAGTGAAG  
AAACACTAGGTGAGCATCGTATCGTTTATGATTTTCCAGAAATAGAAGTATACACCTTGAGTACCGACTCTTGGAGAGA  
AATGAAGACCTATAGTTTAGAAAACAGAACTACTATGTTTCTATGTTTTACCAAATGTACTTCAATGGATTTTGTAT  
TGGATCGGATGTGAGAAAACAAAAGGATTTTCATGGATTATTTTGTATAGAGATGACGAGGAATGGGTAGGCAGGTGATCC  
ATTCATTTGATATGAGTACTGAACTCTTTGATCATATATTGCTTCCGAATAGTTTATACTTATACGAGCCACTGGCGCT  
GTATTTTAACATGCACGTCATTTTGTGGAATGAGTCTATTGCTCTTTTGGCTTGTATCATTGGCGGTCC

>Rchinensis\_NC\_037090\_F\_box\_minus2\_5433148\_5434392

ATGGCAGGGTGCAAATTTGCCAAGGGTGATGGTGGTACAAAATCTTATCAAGAATGCCTCCGAAGTCTCTTATGCGATTCA  
AGTGCCTTCATAAGTCATGGAATTTCTCTGATCAGTAGTCGCCATGTCGTAGCTAAGCATCTCCAGTTTCACAACCACCT  
ATCCTCCTCCACTACCATCCTTCTAAGGCGTCTGTAATCTGGAGAACCAGAAACAAAAGAAATGAGGAAATCGTTTTTCT  
TTGCTTACTCTTCGCAATGAGAAATAATGGTGTATGAGGATAACCTGGATTATGACATCGAGGACATCCACTTTCCGCCTT  
CAATTGGTCTAAAAACTAGGGCACAATTTATTGAGAACCCTGGTCCAACCTTACGAATGTGCAGATATTGTGGGTCAATG  
TGGTGGAAATAATCTGTCTCTCTTTATGCTGCAGGGCACCCTTGCTTATAACAATCCCGCAATTAAGGAATTCAGGTT  
ATACCCGAGCCATGCCTCCACGTCCTCCGTCAGTTTTATTTCCGTTGTGATGCATTTGGTTATGATCCCAAGTCTGAAG  
ATTATATACTTGTAAACGTTGCAAGTTATGGTGAATAAGATAACGATGATGATCGTCTCGTTATTGAACCTCTGAGAGC  
AGAGATGTACACACTGGGTACTAATTTCTGGAGAGAGATCAATATTCACAATTTGGAAACCGAAACTACTATGTTTCGG  
CCTAATCATTTCAGGTGTATTTCAAGGGAAACTGCTACGGGTGGCAGAAGAAATCAAGAAGGAATTCATCTCATCGT  
TTGACAGTCTTGAGGAGTATTACATTAGGGAAGTAATCGTTTGGTTTAAACACGAGCGATCGGGTTTTCCATAGTGCATT  
GACTCCTGATTGTTTGTATCGCTATCCAGCGCATGACTTCAATCTTACAGTGTGGAACAATTCGCTTGCCTTTTTGGC  
TATAACCGTTGTGGAAGTAAACCCTTTGAAATTTGGGTGATGGGTGAATCTGATGGTTTCACTTGTTTCATGGATAAAGC  
ACCTATCGTTGACATTACGGAATCTCCTCAACCATTGGTACTTTGGGAGAGCAACCAGAGTCTTTTGGTGTCCCTCG  
TATCCGAGTAGCATTGTACAGCTTTGCAACCAAAACGTTCAAGTATTTACCAGTGTGTGCTGCTGAACACTTCGATGCC  
ATACCTTTTGTGAATAGTATAGTCCACTCAATAGGGACCTAGTATCTGTTAATATTTCT

>Rchinensis\_NC\_037090\_F\_box\_minus1\_5475947\_5477151

ATGGCAGAGTTTTGCAAAATGCCAGAAGAGATGGTGGTGGTGCCTATCACGGTTGCTTCCGAAATCTCTAATGCGAT  
TCAAGTGCATCCACAAGTCATGGCATTCTCTGATCAATAGTCCCCAGTTTCATATCCAAGCATCTTCACTTTCACAACAA  
CTTGTCTTCCCTCCACTACCATCCTCTTAAAGCGTCTGTAATGCGCAGAACCAGATACTTTGAATGAGAAGATTGTTTGT  
TCGTTCTTAACTTTCACAATGCAAATGATGGTGTATGAGGATAACCTTCAATATGATATCAAGGACCTCGAATTTGAGC  
CTTCAATGGGTTTTAAATACTAGGGGACAATTTATTGAAATACCTAATGAATATTATATAAATTTGTGCATATATATAGG  
TCAATGTGATGGGATATTTTGTCTAATCTTTATGCTGCAAAAAGACCTTGTTTTTGTACAATCCAGCAATCAAAGAATTC  
AAGTTCTTCCCTGAGTCATGCCTTCAAGATAAGAATATAGGTTCTGTGGGATTTGGCTATGATCCCAAGTCTGAAGATT  
ACATACTCGTTAGCGTTGTAAGTTATGGGCATGGGGAGCAATATTACAATGATGATCGTCTCGTTATTGATCCTATGAG  
AGCAGAAGTTTACACAATGAGTACCGATTGTTGGAGAGAGATCAAGATTACAATCTGAAACCGAAACTACGTTTTTT  
TGGCCTAGACATTTCCAAGTGTACTTTAAGGGTAATTTGTTACTGGTTGGCACATGAAAAAAGGAAGGAATTCATCACTT  
TGTATGACAGACTTGAGGAGTACTACATTTGGGAAGCAATTTGTTGTTTTGACACCGCCAATCGGATTTTTTATAATAT  
ATTGGTTCAGATTGCTTGTACGAATTTCCAAATGCATGACTTGGACCTTGCAGTATGGCACGATTCCATTGCTCTTTTT  
GGCTTTTATCGCGGTGGAAGTCGACCCTTTGAGATCTGGGTGATGGATAACTTCGATGGTCTCAACTCTTCATGGGTAA

AACAGCTATCCGTTGACATTGCGAAATCTCCTATAACCGTTGGCACTTTGGGAAAGGAATAAGATTCTTTTGGTTTTTCAC  
ACATACACAAATAGCTTTGTACAGCTTTGTAAGTAAACATATCAGTATTTACCACCTTTATGGTGCAGATTTTTTCAGG  
CTTTTCCTTATGTGGATAGTA

>Rchinensis\_NC\_037090\_F\_box\_plus1\_5558222\_5559472

ATGGTAGAGTTTTGCAAGATTTTCAGAAGAGATAGTGATGCAAATCCTATCAAGGACGCCCTCTAAATCTCTAATGCGAT  
TCAAGTGTATCCAGAAGTCATGGAATCTATGATCAATGATCCACAATTTGCAGCTAAACATCTTCACTTTTACAACAA  
CCCATCTTCATCCACTGCCTTCCTTGTCAAGCGTCTGTCAATCCTCAGAAGCGAAACAAGCAATGAGAACGTTGTACTT  
TCATATCTTCGTCTAGAAACTTATACTAATGGTGTATGATGAAGACCTTCATTTTCGTAGTTGAAGACATCATTGTCCAC  
CTTTTAAGGGTCTAAAGGCTCGGGGCCAATTTATTGAGCTCCCTAGACGTGATGATTCTGTGTATATCATTAGTCATTG  
TGATGGCATCATTTTTCTGACTCTGTATACCGGCGACCTTTTCTTGTACAATCCAGCAATCAAAGAATTCAAGATTATT  
CTAGCGTCATGTTGTATGATTGTTGTTGGAGCACGGTGGGATTTGGATATGATCTCAAATGTAAAGATTACATAATTC  
TAGAAATGCTTGTATGGTGAGACAAATTATAACGATCCTCAGCGTCTCGTTGTTGATCCTCCTATAGCTGCAGTTTA  
CACACTAGGCATTGATTCTTGAGAGAAATCAAGACTGATCACTTACAAACTGAAGATACCTACTTTTGGCCTACCGCG  
TTCGATTTGTACTCGAAGGGAATTTTCTATTTGTTTGGTTATGAGGAAAAGAAGGAGTCTTGGATGACATGGAAAGAT  
GTGAGGAGACAAACAAGCAAGTATGATTTTTGTATGATACAAGAGATGAGCTATTTTCATATTGCAATGCTTCCGGATAG  
TTTTCAATGAGCCTGCATGCGGCGTTCATGATATTCATGTTGCATTGTTGAATAAGTCCATTGCTCTTTATGGGTTTAGC  
ATTTTCGAATCAATTCATTCCATTCAAATATGGGTAACGGATGACATTCCGAGGCGCTCAGGAATATTCTTGGACAAAAT  
ATTTGTCCCTAAATCCGGTAGATAATGTTCCGAGGTCATTGGCCTTTTGGAAAGATCGACGAGGTTCTTATGATTGCCAA  
AGATGGACGTGTAGTCTCTGTAACCTCCTTACCGGAAAACCTCAAGTATTTTCCCATTTCATGGCCTGCACCTAGGAGAT  
GATATTCAGGGCATTGTTTGTGTGGATAGTATAGTTCCACTTAATGGAAGAGAATTATCTAGACAT

>Rchinensis\_NC\_0370909\_F\_box\_plus2\_5618754\_561998

ATGTCAGAGTTTTCCAAATTTCTGAAGAGATGGCCTTGCATATCTTATCAAGGATGCCACCTAAATCTCTGATGCGAT  
TCAAGTGTGTCCGTAAGTCATGGTATGTGTTGATCAACAATCCCAGCTTCGTGGCCAAGCACCTCTATAATTCCTTGCA  
CAATAAACAGTCCACATGCATCTTTGCAAGCGTTACGTCTTCAGGGATATCGCCACTAAAGATGTGGAATCTGTAGTC  
TCATTGATTACTTTTTCTGATGATGATGTTGGTGATACTAACCATGAGCATATATCTCATTCCGTTATCCAGGACATCG  
ATCTTCCACTTTCTATGAGTGGAAATACCGAAGAACCATTTAAATGAGCCTGAGCTTCTCGGAGCTGTATATATTACCGG  
GCATTGTGATGGAATCATTTGTTTAGTCCATGGTGAGATTGTGCTATGGAATCCAGCAATTAAGCAATTCAAGATTCTT  
CCCAAGCCACTCCTTACAAATGGGATCGTAAATTTCTATAGGATTTGGCTATGATGCCAGATCTAAAGATTACAAAGTTT  
TTAGTTTTCCAATCATGATGAGGACCGAAGTAGCGAGCGTGATTTTAATTATCCTCCACATGTTGAAGTATACAGCCT  
CAGTACCGACTTGTGGACAGAGATCAACGCCGATCATTTAGAAACTGAAACAACCAACTTGTATCCTGAATTTTTTCAA  
ATGTACTTCAAGGGAATATGGTATTGGACCGGAAGTGAGCAACAAAAGGAATTCATGGTTGTTTATGATAGTATGGATG  
AGGAATGGGTGAGGCAGCTGATCATTGTGTTTGTATGAATGATGAAGTATTCGAAGACATACTATTTCCGTATAGTTT  
ATACGGCCCGATGATTCCATATTTAGAAATGCGGGTTATTGTGTGGAATGAATCCGTCGCTCTTTTTGGTCAGTACCGT  
TTTTGGTTATGCTGATGATGCTTTTGGATTATGGGTAATGGATGATATTGTCAAAGGTTCTTGGACAAAACAATTAATC  
TAGAGGTCGTAGTTGGGACTCGGATGACTTTGGAAATGTGGAAGAGCGATGAGATTCTTATGGTGGCTAATGACAACCG  
TATATCTCCTACAATATCAGAACTGAAGAGATTAATAATCTTCCCATTGAAAGTACGCATCCAACCTTTTTCCGCAGCT  
ATTTGATGCATAAACAGTATAGTTCCGGTTATTCATGGGAGGCAACAAGCA

>Rchinensis\_NC\_037090\_F\_box\_plus3\_5720698\_5722023

ATGGCAAATTTAGCAAATTTGATTCGTCTGAAGACCTTGTGGAGCAAATTTCTATCAGGACTGCCTCCCAAATCTTTGA  
TGCGATTTAAGTGTGTGTGATTTGTGGTGCAATTTAATCAAGAGCCCTAGTTTTGTAGCTAAACACCTTTCCGGGATC  
TATGCGAGCATCCTCTATGCCCGTTCTTTTCAAGCGCCAGTCCCCAGGGACAAGGAAAATAACATTATGGATGAGAAG  
GGAGTTGAGAATGACGACGACGATGTCGGAATCTATTGTGGTCACTTAATCTCTGCAATGAGGATGATAATGATTACC  
TTCTATCAACCGTACTTGAGGAACCTAATGTTCCGCTTCCGGCTCCTCTTAAGCTAAAACATTCCTCGGATCTGACAA  
TGCAGGTCATTGTGATGGAATCATTTGTTTAAAACCTTTCACTGGTAACGTTATTTTATGCAACCCAGCTATGAAGGAA  
TTTTAAGCTTCTTCCAAGTCTTTCTTCTCCTTTGCAATGATGACTTTGATGATCTCTGGTTCGCTTTCTCTATGAATTA  
GATATTACACTGAACAATTTGGGATTTGGCTATGATCCCGAAGGTAAAGATTACAAGGTTCTTAGATTCTGTAATCTATGA  
TGAGTCATGTTATTGGTTCAAAGCAGAAGTATACACTATGGATTCTAATTTGGAGAGAGATCAAGACCGAATATAAT  
AATAAATCCAATTTGTTAATTGGTCTTCTGATCAGCCTATATACTTCAACGGAATATGTTATTGGCAAGTAAGTGTT  
CAAGGGGGAGTTCATTCTATCATTTGATATGGGTAACGAGCTATTTTCATGAGATATTGAATCCAGATTTGCCAGATAA  
ATGTTGGAGTGGTGAGGCTTGCACTGTGGAAAGAGTTCATTTCTTTTTTACCTATCAAGAAGAAATTGTAGTTCCTCCA  
TCTTACGATATGTGGGTGATGATGGATGATCCTTGGCGATGGCAAGGGTTCATGGACTAAATATTTTACTATAGACCTG  
TCGAAGGTGATAAATGGCCATTGCTATTTTGGAAAGGTGACCAACTGTTAATGGAAGTAACGATGGACAGATCGTCTT  
ATATAACATCGGCACACAAATATTAAAGTATCTTCTATTTTCATTTTCATCAGAGATCTTTACTATAGTCAAGAACTTGTT  
TATGTAATAGTATTGTTTCCATCAACGGAGGCAATGTACTTGAAGATATACATATTTCTGCATTTTATGGCAATGGCA  
AGTTTTATTCCATCAACAAAGGAGACGTAATAGATATTTCTGCTTTTTTATGGCATTACAAGT

>Rchinensis\_NC\_037090\_F\_box\_plus4\_5734186\_5735463

ATGGCTGAGCTAAATTTGCAAAATGCCGGAAGAGATGACATTGCAATTTCTTTCGAGGCTGCCTCCCAAATCTCTGATGC  
GATTCAGTGCATCCATAAGTCATGGTATGCTTTGATCAATAATCCCAAGTTCATAGACAAGCACCTCCACTTGTACAA



CAAAGACTCCTACACTTGCTTCCTTCTCAAGCGCTCCGTGGTTGCAAGAACCCAAAGTATCAAAGAGGAGATCTTATTT  
TCATTCCCTTTATGTTCCGAATGACAATGATGATGAAGACAGTCATCCTCATTGTGTTGTGGAGGACATCTATTTCCGA  
CTGCTATGGGTCTAAAGACTAAGGGGCACAATATTGAGCTCCCTGGGTACATACGGTGGTGAACACTATATACATTTTAGG  
TCATTGTGATGGGATCATTTGTCTAGTTTATCATAGCGGAGGCCTTGTGTTCTACAACCCATCGATACGAGAATCAAG  
ATTATTCCCCCTTCATGTCTTACCGAGTCATTCTCTTGTGTTGGGGGATTTGGATATGATCCAAAATGTAAGGATTACA  
AGGTGGTTAATATTGTACCATCAGGTGAAGATTCATATGATCATAACCAGCGTCTGGTTATTTATCCTCCAAGGGCAGA  
AGTATACACTTTGAGTACTGATTCTTGGAGGCAAATCAAGATTGATTATTTAGAAAACAGAACTACTAGCTTTTGGCCT  
GACATTTATCAGATGTGCTACAAGGGAGTTTTTTTATTGGTTGGGTGATGAACAAGATAAGGAATACCTCTGTTATTATG  
ACAGGCTTTCGTCGCCAAGCATTAGGGATGTAATCCTTTTGTATGACACTGGTGAAGAGGTATTTTCGTAAGGACTACT  
TCCGGATAGTTTCAAGGACCTAGGATTGCATGCTTTATCTATGAGTCTAACAATGTGGAATGGATCTATTGCTCTTTTT  
GGCTTTTCTTATTGGGGTCCGGATATTGAGTCCTTCAAAAATATGGATGATGGATGACTTTGGCAGTTGGACAAAACACT  
TGACCTATGAGACCATAATGGGAATTTATTTGTCATTGGTGTATGGAGAAGTGATGACGTTCTTATGGTTGCCAATGA  
CGGACGTATAGTCTCCTATAGTCTAAGTAGAGATAGGGTTAAGTATTTTCCAATTCAGGTGTTTGGGGAACTTATCAA  
GCTTTTCGTTTGTGTGAATTCGAATAGTATTGTTTCAGTCAAGGGAGGCAACAAGGTTGAGAGCAGAGATATACAACTA  
GTAATGTCCTCCTG

>Rchinensis\_NC\_037090\_F\_box\_plus5\_5751338\_5752603

ATGGCAGAGCTTTCCAAATTTGCTGAAGAGATTATGGTGGAAATCATGTCAAGGTTGCCCTCCCAAATCTCTGATGCGGT  
TCAAGTGTGTCCGTAGGTCATGGAATGCTTTGATCAATAATCCCAACTTTGCAGCCAAACACCTTGCTTCTTCGAAGCG  
CACCTGCTGTCATCCTCCACCACCATCATTTTTAGGCATTTTCTCATTGCAGACCTCAACCCTGACGAGATGGAA  
ATGATACTGTCATTGTACAATTTTGAACGATTTTGTATGGTTGCTTTCTTGAAGATATCCATTTTCCGCATTCCATGG  
GTTTAGAGTGTAGGCGGAAATTTACAGAGCCGGGGTCTACTTTTGGAAATTCATGTTATTGTGATGGGATTATATGTCT  
AGCTGACTATGGACAGAAACCGAACATAGTCTTATGCAACCCAGCAATCAAGGAATTCAGCTTCTTTCCGAGTCGCAG  
CTTGCCCTCTTCTCCCGACATTCGGGAAAACAGCTGCCGTGGGTTTTGGTTGTGATCTGATGTTGAAAAATTATAAAG  
TTGTCAGACTTATAAATAGTGGATGGCGGTATCGTGATGATCAAGATACGGTTATTCCCTCATCTTTATGCAGAAGTGTA  
CAACCTTCGCACAGATTCTTGGAAAAGAAATCAAGATTGATGGTTTTATTAAGGAAAAATAAATCGTTGTGCCTGATTCG  
AATGCTCAAACCAAGGGACTATGCTCCAAGGGAATTCCTTACTGGTGTGCAATGGAAGAAGAAAAGGTTTTAGAAGTTA  
CCTGTGATGGTGTGATGATGAGCAAAAAGAAATTGATATGCATGCATGCATCATTTTCGTTCAACGTAGGTGATGAATCATT  
TCATGTTATAAATATTGGCTCATATGATGATCATTGTTGTTAATAGATGGTGTACTTGGATTGTGGAAAAGAAATCCATT  
GCTCTCTGTGTTTCGTGGCTGGACTACCCTAGACATATGGGTGATGGATGACTTTGGTGGTGGTAAGGGTTCTTGGACAA  
AATACTTGGCGATCGAGCCGGTAGTAAAGATTACATCTCAATTTGCATTATTTGGAAAAGCGATGAGCAGTTTGTCTT  
GGTTGCCTGTGATGATTCTGTTGTAATATTCTATGACATTTGTACCAACAAGTTTAACTATCTTCTCTGAATGGCGTA  
CTTCTGCATCATACTCAAGTTGTTGAATATGCGAGTAGTATAGTTTCAGTCAAAGAATGCAATAAGCTTGATATGGAAG  
CA

>Rchinensis\_NC\_037090\_F\_box\_plus6\_5803902\_5805155

ATGGAAAATTTTCAGCAAATTTGTCAGAAGAGATGGTGGTGCGAATCCTATCACGATTGCCCTCCTAAATCTCTGATTCGAT  
TCAGATGCGTCCGTAAGTTGTGGTACAATGTAATCAATAGTCCCTAACTTCGTAGCCAAGAACCTTACTACTTCCAAGCA  
CAATAAGTTTCAGTTCATCCACTTGCATTCTTGCCAAGCATACTGTCCTCAAGGACAGCAACATTAAGGATAGGAATGAA  
ATTTTGGAAAGTCCCTCAGGGACAACAGCATAGAAAACAAAGAAAATTTACTCTCATTGTGTAACCTTTGCAACGACAACG  
ATGGTGATGACCCTAATCTTAATTATGTAGTGCAGACTTCACCGTTCGGCTTCCCTTAGGTCTACTTCCATTTAGTCT  
AGAGATTGCAGGTCATTGTGATGGGATCATTGTCTAAATAATTCATTTCTTGATGACATAGTCTTGTGCAATCCAGCA  
ACCAAAGAATCCAACTTCTTCCGAAGTCTTGTCTTCTTCCCCTCCTCGACATCCAAATGACTACGATGAAATAGAGT  
CTGATGTAATGCTGTTGGATTCCGGCTACGATTCCAAAGCTCAAGAATACAAGGTTGTTAGAATTGTATCATTATTAC  
TGGGGTTCATAAACCCTTCCCTTCGAAAGCAGAAGTATATACCATTGGCACTAATCTTGGCGAGAGATCAAGGATCAA  
ACTGAAAGTCATGTTTTCTGGGCTGCTTCTTTAAGTTGTCTTGAAGGGATTTTATTTTTGGTGGGCATCAATCTGCC  
CACCAGAGCAGGAAATCATCCTCTCATTGATATGAATGAGGAGCTGTTTCATGATATATATATTTCCAGAGAGTGTCCG  
TCATGACATAGTTCGATGTAATAGAGGTCCTTGCAGTGTGGAAGAGTCCATTGCTCTTTTGGCTTACGGTGGAGACAGT  
GGAGCTCAATCTTTTACATATGGGTAATCGATGACTTCGGTGTCTTTAAGAGTTCATGGATAAAAATACTTAACCATCG  
GACCTCTAGAAGGCATTTTCGATTCCATTGATATTTTGAAGAGTAACGAGTTTCTTATGGCTGCCACTGATGGACGTCT  
AGTGTCTATAACCTTAGCACCCAAATGTTCAAGTATCTTCTTATTCATGGGGTGAAGATCCACCATATATCAAGCC  
GTTGTTATGTAATAGTATTGTTTCGGTCCATGCAAGCAACAACTTGGAGGCATAAATAACTCTAGC

>Rchinensis\_NC\_037090\_F\_box\_plus7\_5808024\_5809247

ATGGGGAAGCTTTGCAAATTTGTCAGAAGAGATGGTCCGGCAATTCCTTTCAAGATTGCCCTCCTAAAGCATTGATGCGCT  
TCAAATGATTCATAAGTCGTGTTACAATCTAATAACTTCTCCTAGCTTTATAGCCAAGAACCTTTCTAATTTCCAAGAA  
CAACAAGTTTTCGTCACCACCTAGAAATCCTTTTCAAGCGTACTGTCCTCAAGGACATTAAGGATAAGAATGAAATATTT  
TATGTCCTTAGGGACAACAACAATGATAGGAGATACATTTTCTTTTCTTACTTGATCTTTGCAACGATAATGATGGTG  
ATGACCAAAACCTTCAATCTGTTGTCGACGACCTTATTGTTCCACTTCTTTTATGATATATGTCCTTTAGTTTACAAAT  
TGCAGGTCACGTGATGGTCTTATTGTTGTTAATATTGTTAATGAGGAGGTTGCTTTGTGCAATCCAGCGATAAAG  
GAATTCAAATTTCTTCTAGGCTTCCCTTCTTCTTCTCCTCGCAGACATCCAGAAGATGATGACGGCATAGAATCGGATG

TAAATGCTGTCGGATTTGGCTATGATTCTAAAACCTCAAGATTACAAGATTGTTAGAGTTATAACATATATTACAGGGAT  
TGCTTATACACTTCCTTCTAAAGCAGAGGTGTACACATTGAGTTCTCATTCTTGGAGAGAGATCAAATTTGATAAAGAA  
TGTCATGTCTTTTGGACTCCTTCATTTGAGATACACTTCAGGGGAATTTATTATTGGAGTGCCTGACTTATCCTACTC  
CAGGAGCGGATAAGGAAGCCATCTTTGCATTTGATATGAGTGAAGAGACATTTGAAGAGATACCGATTCCAGATGGTAT  
TTGTGCCAGAGACGGTATTATTAAGTTCCTTGCTGTGTGGAAAGAATCTGTTGCTCTTATTTCTTGCATAGGAGATGGT  
CCTAAATCCTTCGATATATGGGTAATGGATGACTCTAGTGGGATTAAGGTTTCATGGACAAAACACTTGGTCATTGGAC  
CTATAGAATGCGAGATTCCATTGGTATTTTGGAAAGAGTGATGAGCTTCTTTTGGTTATCTCTGATGGACGTGTGGTCTC  
CTATCACCTTGGTAACAAAACCTATCAAGTATCTTCCGATTTCATGGCGTGAAGATCCCAATACATCCATGCTGTTGTT  
TGCGTAAATAGTATGATTTTCAGTTAAGAAGACCAAAGGT

>Rchinensis\_NC\_037090\_F\_box\_plus8\_5856394\_5857662

ATGATGCAATCTTCCAAATTGGCGGAAGAGATAGTCGTACAATTCATGTCGAGATTGCCTCCTAAAGCCTTGATGCGAT  
TCAAATGTATTCGTAAGTCATGGTACAATCTAATAAATAGTCCAAGTTTTGTGGCTCAGAATCTTTCTTATTCCATGAA  
CAACAAATTCACCTCTTCCACTTGCATCCTTTCCAAGCATACTGTCTCAAGGACGGTAACATTACAGATAGGAATGAA  
ATTCTTGATATCCTTACGTATGGAAACAATGATAAGCAGCAAATTTTACTGTCAATTGCTTAACTTATGCAACGATCATA  
ATGGTGATGATCAAGAGCTTTTTTCTGTTATTAAGGACAACCTTTATTGTTCTTTTTCTTTTTGATAAATGTTTCGTTGAG  
TTTTAAAAATTGCAGGTCATTGTGATGGGATTAATTTGTCTTGTAAACGTTGAGGATGTTGCTTTATGCAACCTTCAATC  
AAGGAATTCATCATCTTCCAAAGTCTTGTCTTCTTCTCCCCCAAAAATTTGGGATGATTATGAAAATGAAGATGATT  
ATTATGAGGCATTAGAATCGGAATCAAATGCTGTGGGATTTGGCTATGATTCCAAAGCTAATGTTTACAAGGTTGTTAG  
AATTGTCCAGTTTACTTTCAGGGTATGTTTTTACTTTCACATCCTTCAAGAGTAGAGGTGTACACCTTAGGGGCAAAATGTT  
TGGAGAGAGATCAAGGCAGATGTACTTGTAAAGTACTGTCTGTTGGAGTCTTTCATTTGAGATGTACTTCAAGGGAAATTT  
ATTATTGGGATGCGTATAGCTATCTTACTCCTAGACAGTATAAGGACGGCATACTTGCATTTGATATGAGTGTGAGCT  
ATTTTATTTGATATACCATCCGGAGACTACACGTGAATTTAACAAGAGCCTTGCTGTGTGGAAAGAATCCATAGCTCTT  
ATCACCTACGAAGGAGATGCTCCTAAATGTTTCGATTTATGGCTAAATGAAGACTCTAGTTGTTTTAAAGGTTTATGGA  
CAAAATACCTTCACTATTGGACCGGTAGAAGTTGAGATTCTTTAGTATTTTGGAAAGAGTAACGAGATTCTTATGGTGAA  
TGCTGATAAACATATAGTTTCTTATAACCTTGATACCCAAACACTCAAGTGTCTCCCAATGCATGGAGTGAAGATCCT  
GAGTATATTTATGCTATTATTTATGTAAGTAGTATTATTTTCAGTAAACAGAGACAATAAGCTCGAGTGTACGACTACTT  
CTATT

>Rchinensis\_NC\_037090\_F\_box\_plus9\_5879526\_5880743

ATGACAGAGTTTTGCAAGATACCAGAAGCCATGGGATTGCAAATCCTATCAAGGCTGCCACCTAAATCTCTGATGCGAT  
TCAAGTGCCTTCATAAGTTCGTGGCATACTCTGATGAAGGACCCCAACTTCGTGGCCAAGCATCTTTCCAATTCATGCA  
CGACAATTTCTGTAGAACTACTGGTGTCTTTTTCAAACGTGAAAACCTCAAGGATACTGGCACTGCCGAGAGGCCAAAGC  
GAAAGTCTTTTGTCAATTGATTAATTTCTGCAATGCTAATGGTGTGATGGTGAAGCATGATATTCATTGTCTTGTGAGGATG  
TTACGAAGGGTCAGTTTAGCGGGTTCGAAGTCTAGAGTCTGCATGGATTATAGGGCATTGTCATGGGATTATCTGTCT  
AAGAAAATGCTACTAAAATAATTTCTATGGAACCCAGCAATTAGGGAAGTCAAGGTCACCTCGCCATATGTTCCAGATGAG  
AACTTAAGTGATTTGGGAATAGGCTATGACCCTAAATCCGACACTTACAAAGTTGTTTACATTTCTTATGGTACTCAGG  
AAGAATATGGTGATGGACATATCCTTATCGATCGACCCAAAACAGAAGTATACACCTTAGGTACTGATTCTTGGAGACA  
GATCATGACGGGCTGTTTAGAAACGGAACTACTCACTTTTGGTTTTGAGATTTCCACATGTACTTCAATGGATTTTGT  
TATTGGAATGGGCGCGAGCAACTGAAGGAATACCAAAATTTTTATGATCTTCAAGAGGAGCATCATATTAGGCCAGTGA  
TCATTTCTGTTGATATGGGTGATGAGGTATTTTATAATATGTTGCTTCCAGATTTTGTATATGAGACCTATATGTGGAG  
TTATGTTTTGCGTCTTATGGCATGGAATGAATCTGTAGCTATTTTTGGCCTAGATCATGGTATAACTTCTCATGAATCT  
TGGGGATTATGGGTGATGGATGACTTTGGTGGAGTTACGGGTTCTTGGATAAAGCAATTTAGCTTTGTGAGCGCAGTGG  
GATCTTGGATACGCCATTGCAAATTTGGAAGAGCGATGAAATCTTATTGTTTCAAAGAAAGGCGTGTCTGCTCATA  
CAACCTTGATACTGAACAGTATAAGTATCTACCCATTTCATAGCATGGATTCTGATTATTTTGAAGCTGTTGTTTACATG  
AATAGTATAGTTTCGGTCAATGGAAGCAAAC

>Rchinensis\_NC\_037090\_F\_box\_plus10\_6536594\_6537988

ATGGCACTTGAGAAGGATTCAGAGATAGCAGAATTGACAGAGTCTGGCAAAAATATTGCGCAAGATGTGGTGAACAAA  
TCCTATCAACTCTGCCTCCCAAATCTCTTATGCGATTCAAGTGCCTCTCTAAATGGTGGTACCATCTCATCACCAGTCC  
CAGGTTTCGTAGCCAAGCAGCTGTCCATTTCCAACACAACAGACCCTCAACTTGTGCTCTTATAAAGAGTTTATGTCAGC  
AATGACGCAGAAGCTCAAGAGCCTGAAATGGTTTTCTCATTTGCTTAACTTTTCTATGAAAATGATAATAACGCTGGTG  
GTGCGCTTAGCACTAATCTTTCTAGTGTGGAAGACCTCACAATCCCTACAAGGGTAGTCGAATCACTTCGTATTATAGG  
CCATTGTGATGGGATTGTTTGTCTAGCTTTAATCGATTATCAGCAGAGGCTAGCTAAACCTAGTCAAGTGTGTCTATGG  
AATCCTGCAATTCAGCAATTTAAATTTCTTCCCGAGGAGCCATTCCTTCCAGATTGGTCCAAGGTACCACACAGCCGTA  
TGGTCCAAGAATTTGCTTACCTGCGTCCAATATCTCTACTCAATGGTGAACCATGGGTTTTGGCTATGATCCTAAATC  
TAAAGATTACAAGGTTATTGACATTTGGATTTTCTGATTCCAAATTTTATGGTGATCCAGAATGTTATGGCGGACATGTG  
ATTGTTTATCCTCCAAAAGCAGTAGTATACACCCTGCAAACCTGATTCTTGGAGAGAGATCAAGACTTTTTCTTTGAAA  
GGGAAACCAGTTACCTTTGGCCTGATACGTTCCAGCTATACTTGAAGGGTGTGTTGTTATGGTTGGGATATGAGCAACA  
AAAGGAATTCCTTATGTCTATTTTACAGACTACCAAGAAGAGGAAGAAGCATTGCGCGAGCGATCATTTCGTTTATGACT  
AGTGATGAGGTTTTTTCATGATATAATGTTACCGCATGGGCTACTGGAATTTTACGGTTTTGATAATTTCTTACATTGC

ATCTTACGGAGTGAATGAGTCTGTTGCTCTTTTCAGCTTGCTTTTTGAGGATGAGCACAAAGCTACAATGTGGGTGAT  
GGATGCCAAAGGTGCTTGGACAAAGCAATTAACCTTTTGAATATGTAGACTACTTTCCCTTACAGCTTACCTCGAAAGATA  
TTGGCATTTTGGAAGAGCAACGAAATTTTGGAGTTGGAGAAAATGGATCTATTGTCTGCTATAACCTCAATACCAAAA  
TTGTCAAGCATCTTCCGATTGCAAGTGTTCAGATTATTTCCACCCTCTAGAGACACTTTCTATCCTTTTTTGTGTAT  
TGCTTATGTGAATAGTGTGCTACCAATCATGAATCATGTGAGAGACACATT

>Rchinensis\_NC\_037090\_F\_box\_plus11\_7143024\_7144325

ATGACGTTGGAGTTTGGCAAAACTATTGATGAAGATGTGGTGGAGCAAATCCTATCAACTCTGCCGCCCAAATCTCTGA  
AGCGATCCAGTGCCTCTAATAGGTGGCATGCTCTGATCACCCTCCAGGTTCTGATAGCTAAGCACCTCTCCATTTT  
CAGGCACAACAATCTCTCCACCAGTGTCTTATGAAACGTAAAGTCCATGAGGACACCAACTCTGACGAGACTCAAGAG  
TTTTTCTCATTTCTTCATTTTCGAAATGATGAAGATAATGACGTTGATGGTGTGCATGATGAGCATAGCTTTCTTTCTA  
GTATCCAGGAATCCATATTCCGTTTTCTACTGGTGTAAAGACTTGGGCCGAAGCACTTATAATTATAGGCCATTGTAA  
CGGGATCATTGTCTAGCTCAAGCAGTCTCTGGTGGAGGTGATTATTTGCAACCCAGCAATTCATGAATATAAGCTTCTT  
CCCCCTCTCCGTACCTTCCAGATTCCGATTGGCCATATAGCGCCATATTTCCGTTTCAGAGATGGATTGGGATTTGGAT  
ATGATCCGAACTTAACGAATATAAAAATTGTTAACATTGGATTTCCCTGCTCCAGAATTATCTACGCCTGATGGATATAA  
CATTTATAATCCTCCCAAAGCAGCTGTCTACACCCTGGGTACTGATGCTTGGAGAAAAGATCAAGACTGATACGTTAGAA  
ACAGAACTACTATTCTTTGGCCCCAAATATTCCAGATGCACCTCAAGGATATGTGCTTTTGGCTGGCACCTGAGCAAC  
ACAAGGAATTGGATGTGCTTGGATGAAGACGAGGAGCAATTCATTAGGGAAGTTATCGTTATGTTTGATACTGGGGATGA  
GCTATTTTCATAATATAATGTTACCGGATGAATTTGATTATCCATCAAAAAATTATTTTGTTCGAACTTTTAGTGTGG  
AAGGACTCCGTTGCTCTTTTGGGAATACAAATTTCTCAATTTTCATCATATGGAATATGGGTGATAGATGAATTTGGTG  
GTCATAACGGTGGTGTGCTTGGACAAAACACATAACTTTTGGCTCCCTGTGGAACCGTTGATATTTTGAAGAGCGACAG  
GGTCTTTTAAATGATCCTAACGACACTGATTATAGAGGACTTATATTAGATTATAATCTCGATACCAAAAAGCTTAAA  
AATCTTCCCGTTCAAAGCGAGCGGAGTACTCTTCTGCTATTGTGTATGTGAGCAGTATAGTTTCAGTATTGGGAGGCA  
GCAAACCAAGAACAAGATAATTTCTACACCCAATGTA

>Rchinensis\_NC\_037090\_F\_box\_plus12\_7149272\_7150558

ATGAAAAGAGTTTGACGGTGAAGATGTAGTGGAGCAAATCCTATCAATTCTGCCACCCAAAACCTCTGATGCGATTCAAGT  
GTGTCTCTCAAAGGTGGTATGCTCTGATCACTAGTCCCAGGTTCTGTTGCCAGCACATCTACAATTCATGCACAACAA  
TCTCTCCACTAGTGTCTTATGAAACGTGAAGTCCAGAAGGACACCAACTGACGAGACTGAAGAGTTGTTCTCATT  
CTTCATTTTCGAAATGATGAAGATAATGATGTTGATGGCGTGCATGACGAGCATAGTGTCTTTCTAGTATCCAGGAAT  
TCCATATTCGTTTCCCTACCGGTGTAAAGACTCCGAACGAATCGCTTATAATTATAGGCCACTGTAACGGGATCATTTG  
TCTAGCTCAAGCAGTATCTGGTGAGGTGATTTTATGTAACCCAGCAATTCATGAATATAAGCTTCTTCCACCCTCTCCA  
CACCTTCCAGATTCCGATTGGCCATGTAGCCCCTTATTCGGTTTCAGAGATGGTTTAGGATTTGGACACGATCCGAACT  
TTAACGAACATAAAGTTATTAACATTGGATTTCCCTGCTCCAGAATTATCTACACCTGATGGATTTAACATTTATAATCC  
TCCCAAAGCAGCTGTCTACACCCTTGGTACTGATTCTTGGAGAGAGATCAGGACTGATTCTTTAGAAACAGAACTACC  
ATTCTTTGGCCCGAACATTTCCAGATGCACCTCAAGGATATGTGTTTTTGGCGGGGACATGAGCAACATAAGGAATTGG  
ATGTGTACGATGCCCGCAAGGAGGAATTCATTAGGGACGTTATCATTATGTTTTGATACTGGGGATGAGCTGTTTCATGG  
TATAATCTTACCCGATGAATTTTATTTTCCATTAAGAATTTATTTGGTGGGCACCTTTTAGTGTGGAAGGACTCTGTT  
GCTCTTTTGGGAAGACAATTTCTGTAACCTTTTGGAAATATGGGTGATGGATGAATTTGGTGGTCTAATGGTGGTG  
CTTGGACAAAATACGTAAGTTTGGAGTCCCTGTGGAACCGTTGATCTTTTGAAGAGCGAGGAGGTTCTTTTGAATGA  
TTATAACGGGACTAAGTATAGCGGACTTATATTCTCTTATAATCTCGGTACCAAAAAGCTTAAAAATCTTCCCATTCAA  
AGCAAGCGGACTGACTCTACTGCTGTTGTGCATGTGAACAGCATAGTTTCAGTCTTGGGAGGCAACAACTCAACAGCA  
AAGATAATTTCTACTCAATGTA

>Rchinensis\_NC\_037090\_F\_box\_plus13\_7425762\_7426949R

ATGGATTCTTGTGTTTGCAATTTGCAAGATTTCAAGTTTCACTCTTTTCGTTTTCTTGGCCATACTTTAATAATTATGTTGT  
TCAGGATGAGAAACAAACGCAGGGAGGATGTTGCCAGTTCATCACTGAAGATCTCCACATGGAAATCTTAGCAAGACT  
CCCGGTAATACTCTCATTCCGTTTCAGTGTGTATGCAAGCGGTGGAGGGGTTTGAATTCGCAGCTCAAGTTTTGTTACA  
GCACATATCAGACAACATTTCCATACCCATCTAATTACGGATGACCGCTCAAGTTTTGACCAGGTTGAGCTTTGTTACT  
CTCTTTTTCATTGTGAAAGATTTGAGCAGTCCCTGGAGTTAAAACCTCCCTTTTCATCCCCAACTAGACTATAATTTCCCG  
ACTAGACTACTTCAAGATATATGGTTCAAAAACCGGTTACTGTGCTTGTGTTGGAAATGTAATGGATTCAAACAGCCCT  
ATATACATATGGAACCCCTCTGTTAGGAAATTCAGGACTCTTCCACAACCAAGATTCGATCATTATTGTGTGGACTGTT  
TTCCCAAGCATGTTGATATCCCTCTCTTATTTGGATTCCACCCAGAATAAATGACTATAAGGTGATAAGGATGATGCT  
GCCTGGTTCCATCAAAATGGAGGTTTATACTCTTAGCACAACTCTTGGAAAGATTATTCAAGTCATTCCACCTTGGCTC  
AATACCATGAAGTTTTCTACTCGATCTGAATTTTGGAAATGGAATGGCATATTGGCTTGGCCACCAAGATTCAATGGTTA  
GGGTTGTGTTGTTTGGATACTAACAATGAAGAATTTGAAGAGCTAGCGGTTCCAATTACGATTTTGGAGTATGATGGGA  
TGCATATATCGAAGTGTACAAAGAATCGATTTGCCTACTTCATGTCAAAGTTGAACTGGATAACGACGTTGGCTGTGAC  
TCTATCGACTTCTGGGTTCTGCAAGAACAGGATTTTAAAGAACTGCATACTGTTTATTTTCCCTCAAGTATATCATGTCA  
TTTTGGGGCTTTAGTGTGGATAATGAGCTCTTACTAGAAGATTATTCATCTGATGGCGAATTGGCGTTTTATAATCTTGA  
ATCCAAACAGGTTTCAGAAAATTCGAATCAGTTCCTATTTAAGCGTACATACTTACATTGAAAGTTTAGTTTTATTTGAT  
ATG

>Rchinensis\_NC\_037090\_F\_box\_plus14\_9568955\_9570373\_  
ATGGAGATAGACGACGTGAATATGTCAGGGGTTCCACAAAAACATTGAACAAGACGTGGTGGAAACAAATCCTATCAACTC  
TGCCCTCCAAAACCTTTGATGCGATTCAAGTGCCTTTCTAAAAGGTGGTATGCTCTCATCACCATCCCAGGTTTCGTAGC  
TAAGCACTTGTCCATTTCCAAGCACAACAATCGCTCTACTCCTTCCGTCCTTTTGAAGCGTTTTAGTCCATAAAGACAAT  
AACACTGATAGTGAGACTCAAGCGGTATTCTCATTGCTCAAATTTTCGCAATAATATTGATGGCGGGCGGCGAAGCGCATA  
GCTTTCTTTCCGGGGTAGAGGACATTGACATTCCTTCTTCTTTGAGTCTAAAGACGGGAGGCTCATCACTTCATATTAT  
AGGCCATTGTAATGAGATCATCTGTCTAGTTCAGCTGTTTCTGGTGAGGTGATATTATGGAACCCAGCAATTCATGAA  
TTTAAGCCTCTTCCCCCTCAGCCTTACCTTCCCAATTTCCCAGAAATAATTGGTACCCTGCCGGGTTGGCCTAAAGATG  
TTCCCTACAGTATACATCGTGAGTACATGGATAGTTTGGGATTTGGCTATGATCCCAGGCTGATGACTACAAAAGTTGT  
TAACATTGGATATCCTTGTCTAGAAAGATCTCTTGTATGGATATCGTATTAATTTTCCCCTGAAAACAGCTGTATATACC  
TTGAGTACCGATTCTTGGAGAGAGATGAAGACTTTTTCTTTGAAAACACAATCTACTATCCTTTTCCCCTGACCGCTTCC  
AGATGTACTTCAAGGGAATGTGTTATTGGTCTGGACTTGAGCTGCATAAGGAAGTACATTTGTTTGACGCGATGGAAGA  
GGAATTCATTAGGAACATTATCATTTTGTTCGATATGGGTGACGAGGTATTTTCATGATATGCTGTTACCGGGTAGTCTA  
TCTGATCCATTTGAGGTATCTTTTAATATGCGCCTTCTAGTGTGGAATGAATCCATTGCTCTTTTTTGGATTGGAAAAGTG  
AGAATTCACCGTATGGTGTATCGTTTGGAAATATGGGTGATAGATGAATTTGATGGTCCTAAGACCCCTTGGACTAAACA  
TATATGTTTCGAGCTCAATGAAAAGCCGTTGGCATTTTTTGAATAGCGATGAGATTCTTATGGAGGTGATAAAGGACACA  
AGTGGACGTCTATTCTCATATAACCTTAGTACCAAACTCTCAAGTATCTTCCCATTGATAGCGTGCAAAAATGATTCTG  
CAGCTGTTGTCTATGGGAATTACAGTATAGTTTCAATCTTGGGGGGCAACAAGCTGGAGAACAAGATAAATCTACAAA  
TGTAATTTCTAACGATGTTTTCTGTTCAAGTCTTAGACAAAATATGCATCAATAACTATGTTTAAATTATATGTT

>Rchinensis\_NC\_037090\_F\_box\_plus15\_14254770\_14255927  
ATGGAGGAAGCAAACCTCCCCGAAGAGATTGTAGTGCTTATCCTCTCCTGGCTGCCCGTGAATCCTTACTCCGATTCA  
CCTGCGTTTCCAAACGCTTTTCATTTTCATCATTCTCTCTAACCCAAAATTTGCTAAAATCCCAATTTCAAGCAGCTCGTGA  
GCGCAAAAACCCCTGGATCAGAGACTCCTCTACAACACAACCCGTCCCTCCACTCGAATCCCCTAGACTTGGAGACGCTGCCG  
TTATTTGGAGACTCTTCCCTACCTCGAACGCAGACTCCTCTACTCCAAAATCGCCCCCTCGACTCGAATCCCTACACTTGG  
AGACGACGTCTTTTGGAGACCGTTCCCTCCGTCAGAAAAGCTACAGTTTCTTTTCCAGCCACCCGTCGGTCTCTCGCT  
ACTGGGCTCCTGCAATGGTATTGTATTTCTTGCCTTTGATGAGAGAGTATTCTATATCTGGAACCCATCGACTGGATTTC  
TTTAGGAAATTACCTGATCCAGGTTCTTTATGTGATCAAAAGATTTCTGTTCAATTATGGTGTGGCTATTTGTGCGCCA  
CCGACGACTACAAAATTTTCATAGCCACCGATGTGTACGCCATTTTCTCGTCGAGAGCTCAAGCTTGGAAAAAACTTGA  
GGTCTATTCGGAATCACCGCCTTCTTTTCCGGGGACCCCTTTTGAACGAGGCACTTCATTGGCTCAATCAAGAGAACGGT  
ATCGTGGCTTTTGGATTTGGCCAGGAGAAGTTCAGTAAAATGACAATGCCTAATTTTCGATGAAAGAAGTTTAAATCAGT  
TCGGCTATCTTGGGGTTTCTGCTGAAGGATGCCTTTCTTTTGGCTCTCTCTGTGGGATGCTCATGACTGTATTCAAGT  
GTGGGTGATGAAAGAATATGGTGTGCATGACTCATGGACTAAGCTCTATAACTTCAGGTTTTTGGATCCTCCAGAGGGG  
ATGTGGTCTTTTCAGTCGTGTATTGGTTTTTGGAACTAGTATTGTTGCCACATATGCATATGAAGGAGGTTGACAATG  
ATTGTATTACCGACGTGAAAGGGTTGATAAAGATTCTTCAACAAGAAGAGGAGAAGTGTGGTGTGATGTGATTGAAGG  
CTTTGAACTTAAAATGATTTCGATATCAAGAGAGTTTATGTCCGATAGATGAT

>Rchinensis\_NC\_037090\_F\_box\_plus16\_17725765\_17727120  
ATGGAACTAGTAGAAGCAAAGTTGTTAAGGTGAGCGATACTTTAACACTAGGTCTGCAGGAAGATGTCTTATTAGAAA  
TTCTCTCATATCTGCCTGTCAAGTCTTTACTTAGGTTTTCGTTGCGTATCGCAAGAGTGGTATGCTCTCACCAAAAAGTCC  
TTATTTCAATTTCCAAACACCTTGTGCATCGCTCTAGATGCTCTAATCCACATCATCCTTGTCTTCTTTCTCTCGCGT  
CTAGCTGGAAGTCTGAAAATAATTTCAAACCACTACTTGGATTCTCATTGCTTCGAGATGAAGAAACAACGTTTTTGA  
GATTACCTTTCTGGAACCTTACAAGCCAAAGAAGGGATGGTTTTATGGCTTGTGGGATCTAGTAATGGCCTGGTTTGTG  
TGTTCTGTTAATTGGGATTAAGAATGATAAGAATAGAACTACAGAGGGTGAAGAAGATAATGCTACTGTGTTCCAACAA  
TTAATAGTAGTATGGAACCCAGCAACAGAACGATTTAGGTTTCTTCCCTAAACCTAATAATAATATTACTTTGGATCAGG  
ATGAGGAGGAGGATATACTACGTGTAAAGGACAACCTTTGTCCCTGTCCTCTTATAGGTTTTGATTTTCGTACATGATCA  
TGACATTACTGAATATAAACTGGTCAGAGTTTTCCATCATGATAGTGTATGATCCCTACGATCATGGCAAAGTACTTACA  
ACTTTTCGAGCTCAAGTCTTTCGTCCAAATCACAAATTTCTGGAGACAAGCCAAGAACGATTTAGGGTTTTCCGTCATGTG  
AAAATTTCTTTTGCATCAACTTCGATTACATTGAATGGAGTGTGTTTGGAAAGGTACAGCGAGCGGGGACGAGTGCTG  
TGTTCTGTCAATTTACGTGAGGAGTTTTCAATGTGATACAGCTACCAATCGATCTACGAAATCATGATGATTGG  
GGCGGACTCCAATTATATTCAATGGAGAAATTCACCGCGACTGTAGCACTTGATTATTCGGCCAATGACGATCTCAACG  
CAGCGCTTTGGGTGATGAGTATGATCAAGAATCAAAGAGGAGTTGTAAGAATGTTGCACAAATACAAAATCCAGCTTG  
GACTCGACAGTTTCAGATTCAAATCTTAGTAATTTTCAAGCAACGCGCCTCCTGGGAAGTTGGAAAGATCAATTTCTC  
TTTTGCATCCGACAAAAGTGAAGTTTTTGTATGCGGCAGCTGATAAATATTGTGCCTCAAGACCTGTTTTTCGTATGACC  
CTAAAAGCGAGACAAAGAGAAAAATTTCTCAAAGATGGAGAGAGGATCAAGTTTTTGTGGAGGAGTAAATTTATGTGGAGAG  
CCTAGTTCCAGTC

>Rchinensis\_NC\_037090\_F\_box\_plus17\_19789495\_19790751  
ATGCCTTCATCCATGACAATGAGAGCGATGAAAATCAAAAACAACCAACACTGAGAGAGATCAAGAAGTAGAAGACAAA  
GAGATGATGAGAAACCTGCATTATTCTACAATTGCCGACCACATAATCCTGGAGATCTTCTGTAGAATCCCAATAAAA  
CACGGTCATCCAATGCAAGTATGTATGCAAGTCTTGGCGCCGTTCTCTCACAGACCAAGAGTTCTCAAATCCCTATTT

GCACGTACTCCGGCGTGCTTGTCTTCTCCAAGACTATAGTAGGACCCCATGCCGGAGGCCAAAACACCATACGTATCGTA  
TACCCCGAATAAGCACATCTTGGCCAACCTTGCAAAGCGTCTCGAGCCCAAACAACGTGGTCTTGAAGCTTTCAGATCC  
CAATGCCTTATAACAACAGGCTCCATTTCAAGTGTACAGGTATTATGGGATCCTGCAATGGCTTCCCTCTGCTTATCCGC  
TATAATTGTAATAATTGGTGCTTTCATTTTTTAACATATCCAATCCCATTACCGGCGAGTCTGTACCTCTCCAGTCAATA  
AAGAAATAGGCCGTCCGGCTCACTTTGGGTTTTGGGTTTAGTCCCATAAGTGATGTCTATAAGGTGGTTGTGTTTACATC  
CAATGAAGATAATGAACATCGCTTTCACAAAAGAAAATTGGACGTGATGGTTTTGACTGTTGGCTCTGGGATTTGGAGA  
AGAATTGGCAAAGTATCCAATGTCATGCATGGAACACGAGAAGGGGTCTTTCATAATGGATTTCTTCACTGGGTTTGGC  
ACTGTAGAAAAGGTTGTCACTTTTTCATTCGTGCATTTGATGTTGAAAGCGAGCGTTTCAAGGATTTACCAATGCCCC  
TTATTATTTCCGTCCCGATTCTATACCTCAAATGCGAGTCTTAGGAGGTTCACTTTCTGTAAGTGATGGCCGCACGTTT  
TGGGTAATGAAAGAGTACGGCGTCAAGAGGTCTTGGACCAAGGAGCTTGTAAATTGGACATGATACAATTGATCCTAATG  
ACGCATATGGGTCTATATACGATATGTTTTAGTTTTGAAATTTACAGAGGGGAAAGTTTTGTTGTTAGCAAACACTAA  
TTTTGTGCCTCTATACTCCTGAAACAAGGACCCTTGAGAGGGTTGAAATTTGATGGGATGCCACCAGGGGGCTTCCATTT  
GTGGCAGACCATATTTCCAAGCTTTGTTTTCTCCGAAGGATATTATCAAGGATTACGTCTCCAAAGTACCTAGT

>Rchinensis\_NC\_037090\_F\_box\_plus18\_19818837\_19820111

ATGACATCGAGAACAATGAACAAGCAGAAAATCAAGACAACCAACTGAGAGAGATCAAGAAGTAGAAGACAAAAGAG  
ATGATGAGAAACCCTGCATTATTCTACAATTGCCAGACCACATAATCCTGGAGATCTTCTGTAGAATCCCAATAAACAC  
GGTCATCCAATGCAAGTATGTGTGCAAGTCTTGGCGTCTTCTCTCAGACCACGAGTTCTCAAAATCCCTATTTGGC  
AATTTCAAAAAAAGAAAAATCCCTATTTGCACGAACCTCCGGCGTGGTTGTTTCTCCAAGACTATAGTAGGACCCACC  
GGAGCCGAAACACCGAACGTTATCGTATATCCCCGAATAAGCACATCTTGGCCAACCTTGGAAAGCGTCTCGAGCCCAA  
CAACGTGGTCTTGAAGCTTTCAAAATCCCAATGCCTTATAACAACAGGCTCCATACAAGTTTTACAGGTATTATGGGATCC  
TGCAATGGCTTCCCTCTGCTTATTCGCGCATAATCGTAAAAATTGATGCTTTCATTTTTAACATATCCAATCCCATTACCG  
GCGAGTCTGTACCTCTTCCAGTCAATAAAGAAATAGGCCGTCCAGCTCACTTTGGGTTTTGGGTATAGTCCCATAAGTGA  
TGCTATAAGGTGGTTGTGTTTACATCCAATGAAGTTAATAAACATCGCTTTTTGTTGTCATTGGACGTGATGGTTTTG  
ACTGTTGGCTCTGTGATTTGGAGAAGAATTGGCAAAGTATCCAATGACATGCATGGAACACGAGAAGGGGTCTTTCATA  
ATGGATTTCTTCACTGGGTTTTGTGCTGTACGGAGGGTTTTTTCATACGTGCATTTGATGTTGAACGCGAGGGTTTTCAA  
GGATTTACCAATGCCCCCTTATTATTTCCATCCCATTCTATACCTCGAATGCGAGTCTTAGGAGGTTCACTTTCTGTA  
AGTGATGGCCGCACGCTTTGGGTAATGAAAGAGTACGGCGTCAAGAGGTCTTGGACCAAAGAGCTTGAATTTGGACATG  
ATACAATTTATCCTAATGACCCATATGGGTCTATATACGATGTGTTTCAAGTTTTGAAATTTACAGAGGGGAAAGTTTT  
GTTGTTAGCAAACACTAATTTGTGCCTCTATACTCCAGAAAACAAGGACCCTTGTGAGGGTTGAGATTGATGGGATGCCA  
TCAGGGGGCTTCCGTTTTCGTGGCAGACCATATTTCCGAGCTTTGTTTTCTCCGAAGGATATTATCAAGGATTACCTCTCCA  
AAGTACCTAGT

>Rchinensis\_NC\_037090\_F\_box\_plus19\_21203124\_21204203

ATGGCGGAGTTCATACCCGAAGATGTGATAGTCAAAGTCTTGGAGAGGTTGCCGATCAAATCCTTAATCCGCTTACCT  
GCGTTTCAAAGCGCTGGCGTTTTATCATATTTGTCCGACCCACAATTTGCCAAAACCCATTACAAAGTATCTTGTGAGCA  
CCAAACCATCCGCCACAGACTCCTCTTCAACAGCCCCGACAAGTTTGGATTTGATTCCCTTGATTCCGAGTCGCCGTTG  
TCGTTCCGAGACAATTCATGTGTGAGAAAGGTTAGAATCCCATTTTTGAAACCAGGCGACATTCTGAGTATGCCACGCT  
CCTGCAATGGTTTGGTATGTGCAGCAGTTATTGTCTCGTTGTACCAAAGATTCTGTATCATTGGTATATTTGGAACCC  
ATCAACTGGATTCTTTAAAAAATTACCTGATCCTTCCATGAATATTGTGTATCTACAATATTATGGTATTGGCTATTTG  
TCAGCCACTGATGACTACAAAATTCCAAACCCAGGGAGATATTCTCATCGAGAGCTAACGTTTGGAAAGACCATTGAGT  
TCCCTAATTTGGATGAATTATACTTATCGAGTGAGGGGATTCGTTCAAATGAAGCACTCCATTGGTTCCACGCAGGTAA  
TGCGGATATTTGTTGCTTTTGTATCTGTCAATTGAAGAATTCCGATCAATGCCACTACCTACTACTTTTGAGCACGGGTGT  
TTCATACATCTGGCGGCTTCTGTTGGAGGATGCCTGTGTGCGTTTGATTTACAAAACGTTAAGGCTAGTGGCTCTATCT  
ATATGTGGTTCATGAGAGAATATGGGGTGGCCGACTCCTGGACTAAGCTCTTCAACTTTAAGGCTCTCCAGTCAGCCGA  
GGATATACGATTTGGGGGCCGATATTCCTTGGGGACACTAGTATAATTTTTGAGTTTCAAGATTGCGATTAAAGAGATT  
GATGGTGGCAGGATACGTATGAATGATTTCAAGTTGATAAGGAGTGTTCATGAGAACGCAGAGAAGCTTGAACGTTGTG  
CCTCGCGAGAGTTTCATGATTGCATATGAAGAGACCCTACTTTGGCTAAACGAT

>Rchinensis\_NC\_037090\_F\_box\_plus20\_21569130\_21570335

ATGGCAAGGAAAGATGAACTCGAGAAGCGGCGGCAGCGGAACCAACTGGTTCCCTCGGCTTGGCGTGGCTGTGTGCTTA  
AACGTCCTCCTTTTACGACGACGACTACTACTACCAGTCGCTAGATACTGGTTCCCTCAAAAACGATATTATCATTTGAGAT  
ACTGAAAAGGCTACCAGCCAAGTCTTTATTGCGATTTTCGTGCTGTATGCAAGTCATGGTGTGCTTTTCATCTCTAATTCT  
TCTCATTTTAGTAGGAAGCATTAAGTACGACGAGTCACCGATAGCAGCAGCTTCCGGTCTCTTTATTTCATTGATGCCTC  
CCCTCTCCGTAGACTGCGAAGCTTTATTGAAGAAAGATGGTCTGTTCAAGGCAGAAAAGCTTAAACTACCCAACCGTTA  
CAAACAGCACCGGCGAACGACTGGCAGTTTTAAACGTGAGGTTGCCAATATTGTTGTGGGTTCTTGCAATGGCTTGATA  
TGCTTCTATTAATAATGGGGCTACGTTGTCTTATGGAACCTTGTACTAGAAAAGTCAACAAATTACCAAAGCAAACCTC  
ATGTTAAGACACATCAAACGTTTTACGGTTTTCGGCTACGATTCCTGCACTGAAAGGTACAAGATCATTCTGGGGGACAT  
GCCCTCGATGCCTAAAACATTAGCCCATACGGCAATTTTTACAACATCATGGAGGAATTTTGTGACGTTCAAATTCAT  
AACGAAATATATGGTTCGTGGATGCTTACTAAACGAGCTCTACATTGGATAGAGAGTGCCCAATGGGATGCCATCGAGG  
ATGACCATAGTGGCCCATCAAGATTGAGTATCATCTCTTTTGTATTTGGCAGAGGAGAAATTTCAAGGCTGGTGTGCTT

ACCCTCTCTTGTAACCTCAAGATACGAGCGCAAAGTTTGGACTTCTAGAGATTCTATCTTTGTATGCTTTTGGAAATGGT  
ACAGTCCGTACAGAGACAAAATTGACAATATGGGAGATGAAGGAATATGGGATTGAGGATTCCTGGACCAATGTTGGGC  
ATATTTTCATTCAACAGTCATCCCGAGTGTATTGGCCGCTGAAATTTTTTGGAGGATGTAACCTTTTTGATGACTATATG  
CGGGGGCTTGCTAGTATATGATCCGGAGAAGAAGACAATCAGATCTAACAGTGATTTGCCCATCTTGTACATGGAGACT  
TTAGTTTCACCATTACCAGC

>Rchinensis\_NC\_037090\_F\_box\_plus21\_26018972\_26020213

ATGCTGAGAACGAAACGAATGAGCCGGTGCAGCAACAATGCAAAGTTGGTGGACCTACCCATTGATATCCTCATCAACA  
TCCTTTTGGAGACTGCCGGCAAATCCTTTGCTGCACACAATGTGTCTGTAAAACCTGCTTCACATAGTTGAAGCTCG  
TTCCCTTGGCAACACTAGTGCATCTGCGCTTGTCTTAATACTGCTTCCGATGCAGTCGCTGAAGTGCCTCAACTTTGCTT  
CTTAATGTTGCCCGAGATGGTGCACAATGGAAGCTTAATAACTATCTCTCCATCGCAGATATATGATGGCAATGTCTTGA  
CAAAAAGCAGACATGCCATTGTCTCAAAGATTGCATCCTACCGATATGGTTACAATGTTGGTTTTGTTTTCTGCAACTT  
GTTCTTCTTTAATGACAAAAGGTATGATCGAGGTCCATGCTTCATTTTTCAACCCTCTCAGGGGAGAAGTTCTCATGCTC  
CCAAAGAGTACCGTCCAAGTTCCACCTTTTAGAAATATGATATTCATAGATTGGTACGGCATGGGGTTTTGATGATATAA  
CCAACACCTACAAGATTGTTTCGTGTTTCCGGAAATGAACGATGCTGTTTTGGTGGCCCAAGTTTATATATTAGGCACCAG  
CTCTTGGAAAACGGATAAGCTCAGTTCCTCCATGTAATTTAAGCACAAAAAATATCTGCATATGGAGACCTGCATTGG  
TTAATTAATCGCTCAAGTACTAGAGGACAAATCTGCATAGTTTCTTTTGGACTTCGAGAAGGAGGAGTTCTATTTGACGC  
CTCATCCCGCATTAAGAAAGCCAGAATATTTCTTTCTTGTCCCTTCACTTTGTTAATTTGAGAGGATCTATGGCAATTTGT  
TGATACTTCATCACATACATATTTGACATATGGGTTTTGAAGAGTTATGAGAAGAAAGAGTGGGTGCGAGATTACAGC  
GTGAATCTCGAACTGCCTGGTGTAGAGCGTCTTTGGCATCTTGACCGGTGTGGTACTTGCATCGGTGAGTGGGAGAATG  
GCATATTTTTCGTAGAATTTTTATGTTACTACTAACGCATTTCTTTGTGGATACAAGATGTGATTCTGTGAAACGTGTATC  
ACTTGGAGGTTTCAGAGTATACGAGGATCTTCAGCTATCCTGGGAGTTTGATTTTCATTAAGATTATGGCAATTTGATT  
AGAGCAGAAGCAGGTAACCTGGAGGCCTGATTTCTCTGAAAAGTCTTGGCAAATTTGAT

>Rchinensis\_NC\_037090\_F\_box\_plus22\_28383240\_28384418

ATGTCAGACTACTTTTCTGAGGAAATCATACAAAGAATCCTGTTGAGGTTGCCTACGAAATCCCTAATCAAATCAACCC  
TAGTCTGCAAGTCATGGATGTCACTCATCAAATCCTCTACCTTCATTCAATCCCATCTCTCCACCACAATCGACACCAA  
CAACCAAAACGATGCCACCTCCTCCTCCTCAGCGCTTTCTCTTACAAGGTTTTCTGATCGTCTGCCTGGTTGCATTGG  
GATAGCCCTGAATTCGGTGAGTATTCCTTGCTTGACAGCCAGTCACTTTCTTGGAAAACGAAACTATTTCCGATCTGA  
AGGTAGTCGGAACCTGTAACGGGCTCATATGCCTTGCCTCACCTATCTGATAACCATTCACCCACTTTAATTTGGAA  
CCCATGTATTAGAAAGATTGTGATTTTGCCTAGCCACCTGCTTGTTTTACCTCTACTGAGTCTAAGTATGATGTGTGC  
ATAGAGCATGGCTTTGGCTATGATTTACATTCCAATGACTATAAGGTGTTGAGAATTTGTGACTCTTCTGATGATCATT  
TGGACTTGTCCCGATTTCGCCACCGTGGTTTCAGGTTTACTCATTAGCCAGGGGCTCCTGGAAGACGCTTGATGCTTCTGT  
TGTTCTGTAGATTTGCAGGGGGTGGTTCTGGTATTGTATTTCTCAATGGTTCTCTGCATATGCTTGAAGTTTCGTTTA  
AGTGTGCAATATGATGATCATACTGATGAATATTGTAAGTATGGTGGAGATACTTTTCAATGCTTCATTTGATATGGCCA  
CCGAATTAATTTGGCGAGGTGATGATGCCAGAAGCTTTACAGAGCAACAGATGTACGATTTCAAATATGGGGACTCCCT  
TGCTTGTATTAAGCATTATGATTATAACTGTGGTTGTGACATATGGGTAATGAAAGAGTATGGTGTACAGAGTCGTGG  
ACATATTTGTACAAGATAGCTGGGTCTCAAGATCGTATATATGGTTTCAAAGGTGTGGGAAGTTGTTCTGAGTGAGG  
AAAATAATCTTGGTTGGTTAAGAATGATTTTCGCTGGATCCTAAGAGCAAACAAGTTCAAGTTTTTCGGAAATAAGGATTA  
TATTTACTACTTCATGGATTCTTTTGTAGAGGGTCTCATCTTGTGTTGACCACGTCAATGCCATTTTCGTACCAA

>Rchinensis\_NC\_037090\_F\_box\_plus23\_28397189\_28398376

ATGTCAGACTACTTTTCTGAGGAAATCATAGAAAGAATCCTGTTGAGGCTGCCTACCAAATCCCTAATCAAATCCACCC  
TAGTGTGCAAGTCATGGATGTCACTCATCAAATCCTCTACCTTCATTCAATCCCATCTCTCCATCACAATCGACTCCAA  
CAACCAAAACGACGCCACCTCCTCCTCCTCAGCGCTTTCTCTTACAAGGTTTTCTGATCGTCTGCCTGGTTGCATTGG  
GATAGCCCTGAATTCGGTGAGTATTCCTTGCTTGACAGCCAGTCACTTTCTTGGAAAACGAACTATTTCCGATCTGG  
AGGTAGTCGGAACCTGTAACGGGCTCATATGCCTTGCCTGACCTATCTGATAACCATTCACCCACTTTAATTTGGAA  
CCCATGTATTAGAAAGATTGTGATTTTGCCTAGCCACCTGCTTGTTTTACCTCTACTCAGTATGATAAGTACATAGAG  
CATGGCTTTGGCTATGATTCACATTTCCAATGACTATAAGGTGTTGAGAATTTGTGACTCTTCTGATGATCATTTCGGACT  
TGTCCCGATTCCGCACTGTGGTTTCAGGTTTACTCATTAGCCAGGGCCTCCTGGAAGACTCTTGTGATGCTCTGTGTTCC  
TGTAGATTTGCAGGGTGGTCTTGTACTATTTCTCAATGGTTCTCTGCATATGCTTGAAGTTTCGTTTTCGTTTTCGTTTC  
GGATATGATGATCAGCGGATGAATATTGTAAGTATGGTGGAGATACTTTTCAATGCTTCATTTGATATGGCCACCGAAT  
TATTTGGCGAGGTGATGATGCCAGAAGCTTTGCAGAGGAACAGATGTACCATTTCAAATATGGGGACTCCCTTGCCTT  
GATTAAGCATTATGATTATAACTGTGGTTGTGACATATGGGTAATGAAAGAGTATGGTGTACAGAATCGTGGACATAT  
TTGTACAAGATAGCTGGGGATCATGATTATATATATATGGTTTCAAAGGTGTGGGAAGTTGTTCTGAGTGAGTTCAATA  
ATCATGGTTCGGTCAAGAATGATTTTCGCTGGATCCTAAGACCAAACAAGTTCAAGTTTTTCGGAAATAAGGATTATACTTA  
CTACTTCATGGATTCTTTTGTAGAGAGTCTCATCTTGTGTTGACCACGTCAATGCCATTTTCGTACCAACGAGCAAGGAAG  
AAG

>Rchinensis\_NC\_037090\_F\_box\_plus24\_36186560\_36187792

ATGGTTCCCTCAAGCAATATAGAAGAAGAAGACCCCCACTGAGATAAAAAGACTTAACCCCTGACATATTTGTTTG  
AAATCTTTGCAAGAGTGCCCATGAAATATCTTTTGCAGTTAACAACAGTTTTGCAAATCTTACAAGGCTTTAATTTAGGAG

CCATGAGTTCAGAAGATTCCATCACGAAAAGAATACCATGAAAATTGCTCCTGATTATCTACTTGTTTCGCAATAGAATT  
GGAGGTCAACAAAGGGGCTTCTCCATTTATTCTGCTAGAACATTTGCCTATGATGAGAATTCAGGGCTTCTAGATCCA  
TAGATATTCCCATGCAGATGCAGCTCCATGACCTTCTCTGTACGAATATGGTTTCACTGTTTATGGTTCTTGAATGG  
ATTGCTTTGCATCTCTTTATTCTCTCTGGACTTGGACTCTCCTTTATATCTGTATAATCCATCACTCAGAAAATCAAG  
CAACTTCTCGAAGTGAATTTGAGCTTCCCTCAAGGCACCTCCATTACTTCTCAGATGGCCACAAGTTTAGTTACTCTCG  
GCTTTGGGTTCCATTCTGGGATGGATGACTATCAGGTTGTGAGGTTTGTACACCCCAATACAAGTATCTTTTATGCTGA  
GGTTTACAGTCTCAAGTTGAATTTCTGGACACCAGTAGAGAATGTTGTAGATCCCCGTGAGGTTTCATGCTTGGTTTATG  
GAAGGATGTACATGCTTGGATGGAGTTATATATTGGCATTTAATGCAGCGTCTAACATGTCCCTCGTTTCTTTAATA  
TGCACACTTCAGTTCTTGGAAAGAGGACGCTTCCATTATCAGTTGCAACCGGTGATGCGTCCAATTTGTTTGAAGTGT  
GCATCCAGAGTGTTCGCGAGCGTGCATGAAAATAGTGTGCAAGTGTGCAAGAAATCACTCTGTTTGTTCGAAGTAATA  
CAGCGAGGCTGCCATCACTACTGTGACATATGGGTTCTGAAAGAGGATACTGAGGAAAAAATTGGCAGGATTCGTCTTC  
CACCACATGCATCTATAGCATGGCCATTGGGATTTAGCACAAATGGCAATGTTGCTTATATGGTTATCACTGAGGATCA  
AGACTTACCCCTGTTGGTTCAATATGTTCTCTGCTGAACCGCATTGAGACTGTTATAACTCAAATAAGTTCACAGACC  
TGGTACGTTGATGCTTATAGAGAGAGTCTGGTTCTACTCGATGAAATC

>Rchinensis\_NC\_037090\_F\_box\_plus25\_38266966\_38268198

ATGGCAGAAGAGGTGGTGGTTCAAATCCTATCGAGGCTACCTCCAAATCTTTGATGCGATTTAAATGCGTCCGTAAGT  
CATGGTGTGCACTGGTCAATAATCCAGGATTCATATTCCAACAACCTCCACTTGTACAACAAATTTTCTCCACTCCCAT  
TCTTATCAAGCGTACGGTCATTAGCCGGACTGAAAGTACCAGCGAGGAAGTTGTGTTTTCTTCCCTCAATCTTCATAAT  
GATGATTATAACTGTCATCTTGGAGCTAACTGTCATTCTATTGTTGAGGACATCAATTTCCAGCTTCTATGGGTCTAA  
AGACGAGGGGGCCAATTTATTGAGCTTCCCTATGCCTAGTTCTAGTTTCGTTTGATGAAGATGTATATGTTATAGGTCATTG  
TGATGGGATCATTGTCTTTTAGTTATATATATTAGCACTAGCGTTATCATATGCAATCCAGCAATCAAGGAGTATAGG  
CTTGTAAAGATGTAGATGTAATCTCATTTCATGTCCGATTTGGCTATCATCCAAAATCCAAAGATTACATACTTATTA  
ATGTCATGTCGACTGGAGAGAAAATATATGATAACGAGCGTCTCGTTATTCATCCTCCTAGGGCAAAATTATACACTTT  
GGAACTGGTTCTTGGAGAGAGATCAATACAAATTTTGGAAACAGAACTACCCACTTTTGGCCTAGTCTTTTCCAG  
TTCTACTTTAAAGGAATTTCTATTGGTTGGGAAATGAGCAAAGGAAGGAACCTCATCTCTGAGTTTGCAGGGATGATG  
AGGATAACAATAGACTAGTAATCCTTTTCTATGATGCAGGTGATGAGCTCTTTTCATAGTTTATTGCTTCCAGATGGTTT  
CTATGACCCAAGTGAAGGCTTTTATGGTATGCGTCTTGCATTTGTTGAATGAATCCATTGCTCTTTATGGCTTTCCTGC  
ATTTGGTAACTGTCCTTACCATTTCGAAATTTGGATAATGGTCGACTTTGATGGTACCAACTGTTCTTGGACAAAAACAGT  
TGGCAGTTGTGCCACGGTGGAACTTTATATGCCAGGGGCACTTTGGAAAGAAATGTTATTCTAATTAACAGAGAAGG  
GCGAGTAGTTTCTACAATTTTGATAAGGAGAAAATTAATAAACCAGATACATGGTGTGCTTCGAGCAAGTTTCAAA  
GCTACAATTTGTGTACATAGTATAGTTTCAGTCAAGGGACAACCAACC

>Rchinensis\_NC\_037090\_F\_box\_plus26\_43723185\_43724546

ATGGCTATATACTTCATCGATGACTCTTTTTCTATCTCACGAGGTCTATTTGAAAAACGATTCCTGCCTTCATCCATGA  
CATCGAGAACAATGAACAAGCAGAAAATCAAAAACAACCAACACTGTGAGAGATCAAGAAGTAGAAGACGAAAGAGATGA  
TGAGAAACCCCTGCATTATTCTACAATTTGCCAGACCACATAATCCTGGAGATCTTCTGTAGAATCCCCATAAACACGGTC  
ATCCAATGCAAGTATGTGTGCAACTGTTGGCGTCTTCTCTCAGACCACGAGTTCTCAAATCCCTATTTGCGAATT  
TCAAAAAAAGAAAAATCCCTATTTGCCCGAACTCCGGCGTGGTTGTTTCTCCAAGACTATAGTAGGACCCACCGGAG  
CCGAAACACCAACGTTATCGTATATCTCCGAATAAGCACATCTTGGCCAACCTGGAAAGCGTCTCGAGCCCAACAAC  
GTGGTCTTGAAGCTTTCAAATCCCAATGCCTTATAACAACAGGCTCCATAACAAGTGTACAGGTATTATGGGATCCTGCA  
ATGGCTTCTCTGCTTATTCCGCCATAATGGTAAAATTGATGCTTTTCAATTTTAAACATATCCAATCCCATTACCGGCCA  
GTCTGTACCTCTTCCAGTCAATAAAGAAATAGGTCGTCCAGCTCACTTTGGGTTTGGATTTAGTCCCATAAGTGTATGTC  
TATAAGGTGGTTGTGTTTACATCCAATGAAGTTAATGAACATCGCTTTCACAAAAGAAAATGAACGTGATGGTTCTGA  
CTGTTGGCTCTGGGATTTGGAGAAGAATTGGCAAAGTATCCAATGTATGCTTGGAAACGACACAAGGAGTCTTTCATAA  
TGGATTTCTTCACTGGGTTTGGCACTATAGAAAAGGTTGTATCACTTTTTTCATACGTGCATTTGATGTTGAAAGCGAG  
GGTTTCAAGGATTTACCAATGCCCCCTTATTATTTCCGTCCCGATTTTATGCCTCAAATGCGAGTCTTAGGAGGTTTAC  
TTTCTGTAAGTGTGAGGCGCACGTTTGGGTAATGAAAGAGTACGGCGTCAAGAGGTCTTGGACCAAGAGCTTGAAT  
TGGACATGATAACAATTTATCCTAATGACCTATATGGGTCCTATATACCATATGTTTTCAGTTTTGAAATTTACAGAGGGG  
AAGGTTTGTGTTAGCAAAAATAAATGTTGCTCTATACTCCTGAAACAAGGACCTTGTGAGGGTTGAGATTGATG  
GGATGCCATCAGGGGGCTTCCATTTCTGTGGCAGACCATATCCGAGCTTTGTTTCTCCGAAGGAAATTATCAAGGATTA  
CCTCTCAAAGTACCTAGT

>M\_domestica\_S1\_SFBB13\_SFBB1\_MG458583

AAATGCATACGCAAGTCTTGGTGCCTCTCATCAATACTCCAAGTTTTGTTGCCAAACACCTCAACAATTCATGAACA  
ACAAACTATCGTCCCTCCACTTGCATCCTTCTCAACCGTTGTCAGAATCATGTTTTCCCGGATAGAAGTTGGAAACCAGA  
AGTTTTCTGGTCCATAAATTAATCTTTCCATTGATAGCGATGATACAACCTTCATTATGATGTTGAGGACCTCAATATA  
CCGTGTCCATTGGAAGGTCATGATTTTGTAGAGATTGGTGGCTATTGCAATGGGATTTGTCTGTGTACTAGCATGGAAAA  
CTCTTCATTGGATATATGTTATTTTATGCAATCCTGCAACTGGGAAATTTAGGCAACTTCCCATTTCATGCCTTCTTCA  
ACCTTCCCGTCTTAGGAGAAAATTTGAATTTGAACACGATCTCTACATTATTGGGATTTGGTTATGATTGCAAAGCTAAA  
GAATACAAGGTCGTGCAAGTTATTGAAAATTTGTGAGTATTCAGATGCTGAGCAATATGATTATCATCGTATTGCTCTTC

CTCACACGGCTGAGGTATATACCACGACTGCTAACTCTTGGAGAGAGATCAAGATTGATATATCAAGTGAAACCTATTG  
TTATACTTGTTCAGTGTACTTGAATGGATTTTGTATTGGATTGCAACCGATGAAGAAGATTTTCATACTTTTCATTTGAT  
TTAGGTGATGAGATATTTTCATAGAATACAATTGCCTTCTAGGAGAGACTCTGATTTTAAGTTTTCTAATCTCTTTCTGT  
GTAATAAATCGATTGCTTCTTTTGGTTATTGTTGCAATCCAAGTGATGAGGATTCTACATTat

>M\_domestica\_S1\_SFBB2\_MG458453

ATGACTAAGGTACGTGAAAGTGAAACTCCTGAAGATAGGGTGGCCGAAATCTTGTCCAGGTTGCCTCCGAAGTCTCTGA  
TGCCTTTCAAATGTATAAGCAAGTCTTGGTGCACGGTCATCAACAATCCAAGTTTTATGGCCAAACACCTCAGCAATTC  
CGTTAACAACAAATTTCTCATCCTCCACTTGTATCCTTCTCCACCGTCTCAGATGCCGTTTTCCCGGACAGAAGTTGG  
AAACGAGAATATTTCTGGTCCATGATTAATCTTTCCCATGATAGTGATGAACACAACCTTTATTATGATGTTGAGGACC  
TAAATATACAATTTCCATTGGAAGATCATGATCATGTATCGATTTCATGGCTATTGCAATGGGGTTGTCTGTCTAATAGT  
AGGGAAAAATGCTGTTTTTATACAATCCTGCAACGAGGGAACTGAAGCAACTGCCTGATTCATGCCTTCTTCTACCTTCC  
CCTCCGGAGGGAAAATTCGAATTGGAATCGACCTTTCAAGGAATGGGATTTGGATATGATAGCAAAGCTAAAGAATACA  
AGGTTGTGAAAATTATAGAAAATTGTGAGTATTCAGATGATATGCGAACATTTTCTCATCGTATTGCTCTTCCCTCACAC  
GGCTGAGGTATATATCACGACTACTAACTCTTGGAGAGTGATCGAGATTGAAATATCAAGTGATACCTATAAATTGTTCT  
TGTTTCAGTATACTTGAAGGGATTTTGTATTGGTTTTGCAAGCGATGACGAGGAATACATACTTTTCATTTGATTTAGGTA  
ATGAGATATTTTCATAGAATACAATTGCCTTATAGGAAAAGTCCGGTTTTTTGTTTTATGATCTTTTTTCTGTATAATGA  
ATCCATCGCTTCTTTTTGCTCTCTTTATGATAAAAAGTGACAATTTCTGGAATATTGGAAATACTT

>M\_domestica\_S1\_SFBB3\_MG458465

ATACGCAAGTCTTGGTGCACCTCTCATCAATAGTCCAAGTTTTGTGGCCAAACACCTCAGCAATTCCTTGGACAACAAAC  
TCTCATCCTCCACTTGTATCCTTCTCAACCGTTCCTCAGTTTCACATTTTCCCGGATCAGAGTTGGAAACGTGAAGTTTT  
ATGGTCCATGATTAATCTTTCCAGTGATAGTGATGTGCACAACCTTCATTATGATGTTAAGCCCTTAAATATACCGTTT  
TCTAGGGATGACCATAATCATGTACAGATTCACGGGTATTGCAATGGGATTGTATGTCTAATAGAAGGGGATAATGTTT  
TTCTATGCAATCCTTCAACGAGGGAAATTCAGGCTACTTCCAATTCATGCCTTCTTGTACCCCATCCCAGGGGAAAATT  
CGAATTGGAAACAACCTTTACGGAAATGGGTTTTGGCTATGATTGCAAAGCTAATGAATACAAGGTTGTGCAAAATTGTA  
GAAAATTGTGAGTATTCGGATGATGAGCAAACATATCAACATTTGATTGCTTATCCTTACACGGCTGAGGTATACACCA  
CGGCTGCTAACTTTTGGAAAGAGATCAAGATTGATATATCAAGTTCAACCCATCCCTATCCCTATTCTGTGTACTTGAA  
GGGATTTTGTATTGGTTTTGCAACGGATGGCGAAGAATGCATACTTTTCATTTGATTTAGGTGACGAGATATTTTCATAGA  
ATACAATTGCCTTCTAAGATAGAATCCGGTTTTAACTTTTGTGGTCTTTTTCTTTATAATGAATCTATCACTTCTTATT  
GTTGTCTTATGATCCAAGTGAGGATTTCTAAATTTTGAATATGGGTAATGGATGACTATGATGGAGTTAAGAGTTC  
ATGGACAAAACCTTAACCTGTTGGACCCTTTAAAGGCATTTGAGTATCCATTGACACTTTGGAAATGTGACGAGCTTCTT  
ATGCTTGCATCCGATGGAAGAGCCACCTCTTAT

>M\_domestica\_S2\_SFBB3\_MG458468

ATGTCCAAGTGCGTGAAAGTGAAACTCTTGAAGACAGGGTGGTTCGAAATCTTGTCTAGGTTGTCGCCCAAGTCTCTGT  
TGCGATTCAAATGCATACGCAAGTCTTGGTGCACCTCTCATCATTAGTACAAGTTTTGTTGCCAAACACCTCAGCAATTC  
CTTGGACTACAAACACTCATCCTCCACTTGTATCCTTCTTAACCGTTCCTCAGTTTCACATTTTCCAGATCAGAGTTGG  
AAACATGAAGTTTTATGGTCCATGATTAATCTTTCCATTGATAGTGATGTACATAACCTTCATTATGATGTTAAGTCCC  
TAAATATACCGTTTCTTAGGGATGACCATAATCATGTACACATTCACGGTTATTGCAATGGGATTGTATGTCTAATAGA  
AGGGGATAATGTTCTTCTATGCAATCCTTCAACGAGGGAAATTCAGGCTACTTCCCGATTTCATGCTTCTTGTACCCAT  
CCTGAGGGAAAATTCGAATTGGAAACGACCTTTACGGAAATAGGTTTTGGCTATGATTGCAAAGCTAAAGAATACAAGG  
TTCTGCAAATATAGAAAATTGTGTGTATTTCAGATGATGAGCAAACATATCAACATTTGATTGCTTTTCTTACACGGC  
CGAGGTATACACCACGGCTGCTAACTTTTGGAAAGAGATCAAGATTGATATATCAAGTACAACCCATCCCTATCCTTTT  
TCTGTGACTTGAAGGGATTTTGTATTGGTTTTGCAAGGGATGGCGAGGAATGCATACTTTTCATTTGATTTAGGTGATG  
AGATATTTTCATAGAATACAATTGCCTTCTACGATAGAATCTGGTTTTAAGTTTTGTGGTATTTTTCTTTATAATGAATC  
TATCATTTCTTATCGTTGTCTGTTATGATCCAAGTGAGGATTTCTAACTTATTCGAAATGTGGGTAATGGATGGGTATGAA  
GGAGTTAAGAGTTTCATGGACAAAACCTTAACCGTTGGTCCCTCTAAAGGCATTGAGTATCCATTGACACTTTGGAAAT  
GCGACGAGCTTCTTATGGTTGCCCTCCGGTAGAAGAGTACCTCTTATAATTCTAGTACCAGAAAATCTCAAGGATCTTCA  
TATTCTCCAATTTATGCATCAGGTTACAGGTTTGAAGCTCTTATTTATGAGGAAAGTCTTGTTCCAATTAAG

>M\_domestica\_S1\_SFBB4\_MG458475

ATGTCCCAAGTGCGTGAAACTGAAACTCCTGAAGATAGGGTGGTTCGCCATCATGTCCAAGTTGCCGCCCAAGTCTCTGA  
TGCGATTCAAATGCATACGCAAGTCTTGGTGCACCTCTCATCAATAATCCAAGTTTTGTGGCCAAACACCTCAGCAATTC  
TGTGGACAACAATTTCTCATCCTTACTTGTATCCTCCTCAACCGTTCCTCAGGTTTCAGTTTTCCCGGACAAGAGTTGG  
AAACATGAAGTTTTATGGTCCATGATTAATTTTTTTAATGATAGAGTTTTCACGCACCTTTATTATAATGTTGAGGACC  
TAAATATACCGTTTCCAAGGGATGACCATGAACATATACTGATTCATGGTTATTGCAATGGAATTGTTTGTGTAATATC  
AGGGAAAAATATTTCTTTTATGCAATCCTGCAACGAGGGAAATTCAGGCAACTTCCCTGATTCATTCTTCTCCTACCTTCC  
CCTCTCGCGGAAAATTCGAATTGGAGACCGACTTTGGAGGATTGGGATTTGGCTATGATTGACAGACTAAAGATTACA  
AGGTTGTGCGAATTATAGAAAATTGTGAGTATTCAGATGATGAGCGAACATATTATCATCGTATTCTCTGCCTCACAC  
GGCTGAGGTATACACCATGGCTACTAACTCTTGGAAAGAGATCAAGATTGATATATCAAGTAAAACCTTATCCCTGTTCT  
TGTTTCAGTGTACTTGAAGGGATTTTGTATTGGTTTTACAAGGGATGGTGAGGAATTCATACTTTTCATTTAATTTAGGCG



ATGAGAGATTTTCATAGAATACAATTGCCTTCTAGGAGAGAATCCGGTTTTGAGTTTTATTATATTTTTTGTGTGTAATGA  
ATCCATTGCTTCTTTTTGCTCTCTTTATGATCGAAGTCAAGATTCTAAATCATGTGAAATATGGGTAATGGACGATGAT  
GGAGTCAAGAGTTCATGGACAAAACCTCTAGTCGCTGGACCTTTAAAGGCATTGAGAAGCCATTGACACTTTGAAAT  
GTGATGAGCTTCTTATGATTGACACCGATGGAAGAGTCATCTTATAAATCTGGTATTGGATATCTCACCTATCTTCA  
TATTCTCCGATTATCAATAGGGTTATAGATTCCCAAGCTCTTATTTATGTAGAAAAGTATTGTTCCAGTCAAG

>M\_domestica\_S1\_SFBB5\_MG458492

ATGTCCCAGGTCCGTGAAATTGAACTCTTGAAGATAAGCTGGTTCGAAATCTATCTAGGTTACCGCCCAAGTCCTTGA  
TGAGATTCAAATGCATACACAGGTCCTGGTGCCTATCATAAGTAGTCCAAGTTTTGTGGCCAAACACCTCAGCAATTC  
CATGGACAACAAACTCTCATCCTCCACTTGTATCCTTCTCAACCGTTGTGAGGTTACGTTTTCCAGGATAGGAGTTGG  
AAACAAGACGTTTTCTGGTCCATGATTAATCTTTCCATTGATAGTGATGAGAGAAATCTTCATTATGATGTTGAGGACC  
TAAATATACCGTTTTCCAATGGAAGATCAAGACAATGTAGAGCTTACCGTTATTGCAATGGGATTGTCTCTGTAAAAGT  
AGGGAAAAATGTTCTTTTATGCAATCCTGCAACAGGAGAATTCAGGCAACTTCCATAATCATCCCTTCTTCTACCCCTT  
CCCAAGGGAAGATTTCGGATTGGAAACCATCTTTAAAGGATTGGGATTTGGCTATGATTGCAAAACTAAAGCGTACAAGG  
TTGTGCAAATTATAGAAAATTGTGATTGTGAGTATTTCAGAAAGTGAAGAATCATATTTATGAGCGTATTCTTCTTCTTA  
CACGGCTGAGGTATACACCATGACTGCTAACTCTTGGAGAGAGATCAAGATTGATACATCAAGTGATACTGATCCGTAT  
TGCATTTCCCTATTCTGGTTCAGTGTACTTGAAGGGATTTTTGTTATTGGTTTTGCAAACGATAATGGGGAATACGTATTTT  
CATTTGATTTGTGTGATGAGATATTTTCATAGAATAGAATTGCCTTCTAGGGGACAATTCGATTTTAAAGTTTTATGGTAT  
TTTTCTGTATAATGAATCCATCGCTTCTTATTGCTCTCGTTACGAAGAGGATTGTAAATTTATTTGAAATATGGGTAATG  
GATGATTATGACGGAGTTAAGAGTTCATGGACTAAACTGCTAACTGTTGGACCTTTAAAGACATTGATTATCCATTGA  
CATTTGGGAAATGTGATGAGGTTCTTATGCTTGGCTCGTATGGAAGAGCGGCCCTTGTAAATCTAGTACCGGAAATCT  
CAAGTATTTTCATATTCCTCCATTATCAATTGGATGATCGATTATGTGAAAAGTATTGTTCCAATCAAG

>M\_domestica\_S1\_SFBB6\_MG458504

ATGTCCCAGGTGCATGAAAGTGAACCTCCTGAAGATAAGGTGGTTCGAAATCTTGTCAAGGTTGTGCGCCCAAGTCCCTGA  
TGAGATTCAAATGCGTACACAAAATCATGGTGCCTATCATCAATAGTCCAAGTTTTGTGGCCAAACACCTCAGCAATAC  
CGTGGACAACAAATCTCATCCTTCACTCGCATCCTTTTCAACCGATGTCAGGTTTCATGTCCTCCCGGACAGGAGTTGG  
AAAAGAGATGTTTTCTGGTCTATGATTAATCTTTCCATTGATAGTGATGAGCACAACCTTCGTTATGATGTGAGGACC  
GAAATATACCCCTTTCCATAGAAAGTTCAGACAATGTACAGCTTTACGGTTATTGCAATGGGATTGTCTGTGTAATAGT  
AGGGGAAAATGTTCTTCTATGCAATCCTGCAACAAGAGAATTCAGCAACTTCCCGATTTCATCCCTTCTTCTACCCCTT  
CCCATGGGAAAATTCGGATTGGAAACCTCTTTAAAGGATTGGGATTTGGCTACGATTGCAAAACTAAAGAATATAAGG  
TTGTGCGAATTATAGAAAATTGTGATTGTGAGTATTTCAGATGGTAAAGAATCATATATTGAGCGTATTCTTCTTCTTA  
CACGGCTGAGGTATACACCACGGCTGCTAACTCTTGGAAAGAGATCAAGATTGATACATCAAGTGATACTGATCCCTAT  
TGCATTTCCCTATTCTTGTTCATGTACTTGAAGGGATTTTTGTTATTGGTTTTGCAAACGATAACGGGGAATACATATTTT  
CATTTGATTTAGGTGATGAGATATTTTCATAGAATAGAATTGCCTTTTCGGAGAGAATCCGATTTTAAAGTTTTGTGGTCT  
TTTTCTGTATAATGAATCCGTCGCTTCTTATTGCTCTTGTACGAAGAGGATTGTAAATTTGGTTGAAATATGGGTAATG  
GATGATTATGATGGAGTGAAGAGTTCATGGACAAAACCTTCAACCGTTGGACCTTTAAAGACATTGAGTCTCCTTTGA  
AATTTGGAAATGTGACGAGGTTCTTAGCCTTTCCCTCGTATGGAAGGCCACCTCTTATAATCTAGTACCGGAAATCT  
CAAGTATTTTCATATTCCTCCTATTATCAATTGGATGATAGATTATGTGAAAAGTATTTTCTGTCAAG

>M\_domestica\_S1\_SFBB7\_MG458517

ATGTCCCAGGTGCGTGAATTTGAAATCCTGAAGATAAGGTGGTTCGAAATCCTGTCCAAGTTGCCGCCCAAGTCTCTGA  
TGAGATTCAAATGCATACGAAAGTCTTTGTGCACTATCATCAATAGTCCAAGTTTTGTGGCCAAACACCTCAACAATTC  
CATGGACAACAAACTCTCATCCACCCTTGTATCCTTCTCAACCGTTGTGAGGTTACATTTTCCCGGACAGGAGTTGG  
AAACAAGACGTTTTCTGGTCCATGATTAATCTTTCCCTTTGATAGTGATGAGCACAACCTTCATTATGATGTTGAGGACC  
TAAATATACCGTTTTCCAATAGAAGATCAAGACAATGTAGAGCTTTCATGGTTATTGCAATGGGATTGTCTGTGTAATAGC  
AGGGAAAAATGTTCTTTTATGCAATCCTGCAACGAGAGAATTCAAACAACCTTCCCAATTCATCTCTTCTTCTACCCCTT  
CCCAAGGGAAGATTTGGATTGGAAACGACCTTTAAAGGAATGGGATTTGGCTATGATTGCAAAACTAAAGAATACAAGG  
TTGTGCGAATTATAGAAAATTGTGATTGTGAGTATTTCAGATGATGGAGAATCATACTATGAGCGTATTCTTCTTCTCA  
CACGGCTGAGGTATACACCACGACTGCTAACTCTTGGAAAGAGATCAAGATTGATATATCAATTGAAACTGGTTGGTAT  
TGTATTTCCCTATTCTAGTTCAGTGTACTTGAAGGGATTTTTGTTATTGGTTTTGCATACGATAACGGGGAGTACGTATTTT  
CATTTGATTTAGGTGATGAGATATTTTCATAGAATAGAATTGCCTTCTAGGAGAGAATCCGATTTTAAATTTTTATGGTAT  
TTTTCTATATAATGAATCCATCCTCGTATTGCTATCGTACGAAGAGGATTGTGAATTTATTTGAAATATGG

>M\_domestica\_S10\_SFBB7\_SFBB21\_MG458525

ATGTCCCCTGAAAGTGAACCTCCTGAAGATAAGATGGTTCGAAATCTTGTCCAAGTTGCCGCCCAAGTCTCTGATGAGAT  
TCAAATGCATACGCAATCTTGGTGCCTATCATCAATAGTCCAAGTTTTGTGGCCAAACACCTCAGCAATTCATGGA  
CAACAAACTCTCATCCACCCTTGTATCCTTCTCAACCGTTGTGAGGTTACGTTTTCCCGGACAGGAGTTGAAACAA  
GACGTTTTCTGGTCCATGATTAATCTTTCCATTGATAGTGATGAGCACAACCTTCATTATGATGTTGAGAACCATAAGA  
TACCGTTTTCCAATGGAAGATCAAGACAATGTAGAGCTTACCGTTATTGCAATGGGATTGTCTGTGTAATAGCAGGGAA  
AAATGTTCTTTTATGCAATCCTGCAACAGGAGAATTCAGGCAACTTCCCAATTCATCTATTCTTCTACCCCTTCCCAAG  
GGAAGATTTCGGATTGGAAACGACCTTTAAAGGAATGGGATTTGGCTATGATTGCAAAACTAAAGAATACAAGGTTGTGC

GAATTATAGAAAATTGTGATTGTGAGTATTCAGAGGATGGAGAAACATACAATGAGCGTATTCTTCTTCTCACACGGC  
TGAGGTATACACCACGACTGCTAACTCTTGGAAAGAGATCAAGATTGATATATCAATTGAAACTCGTTGGTATTGCATT  
CCCTATTCTGGTTCAGTGTACTTGAAGGGATTTTGTATTGGTTTGCATACGATAACGGGGAGTACGTATTTTCATTTG  
ATTTAGGTGATGAGATATTTTCATAGAATAGAATTGCCTTCTAGGAGAGAATCCGATTCAAGTTTTATGGTATTTTCT  
ATATAATGAATCCGTCACCTTCGTATTGCTATCGTCACGAAGAGGGATGTCAATTATTTGAAATATGGGTAATGGACGAA  
TATGATGGAGTTAAGAGTTTATGGACAAAACCTGCTAACCATTGGACCCCTTAAAGACATTGATTATCCATTGACACTTT  
GGAAATGTGACGAGATTCTTATGCTTGGCTCATATGGAAGAGCTGCCTCTTGTAAATCTAGTAGTGGAAATCTCAAGTA  
TCTTCATATTCTCTATTATCGAATGGATGGTGGATTATGTGAAAAGTATTGTTCCAGTCAAGTGCATTGAGGGAAAA  
GTTCCATTTTCTCCTATT

>M\_domestica\_S10\_2\_SFBB7\_SFBB21\_MG458526

CCGCCCAAGTCTCTGATGAGATTCAAATGCATACGCAAGTCTTGGTGCACATCATCAATAGTCCAAGCTTTGTGGCCA  
AACACCTCAGCAATTCATGGACAACAACTCTCATCCACCGCTTGTATCCTTCTCAACCGTTGTCAGGTTTCATGTTTT  
CCCGGACAGGAGTTGGAAACAAGACGTTTTCTGGTCCATGATTAATTTTTCCATTGATAGTGTGAGATAACTTTTCAT  
TGTGATGTTGAGGACCTAAATATACCGTTTTCCAAGGGAAGATCAAGACAATGTAGAGCTTCACGGTTATTGCAACGGGA  
TTGTCTGTGTAATAGTGGGGAAAAATGTTCTTTTATGCAATCCTGCAACGGCAGAAATTCAGGCAACTTCCCGATTTCATC  
TCTTCTTCTACCCCTTCCCAAGGGAAGATTCGGATTGGAAACGACCTTTAAAGGAATGGGATTTGGCTATGATTGCAAA  
ACTAAAGAATACAAGGTTGTGCGAATTATAGAAAATTGTGATTGTGAGTATTCAGAAGATGGAGAATCATACTATGAGC  
GTATTCTTCTTCTCACACGGCTGAGGTATACACCGCGACTGCTAACTCTTGGAAAGGAGATCAAGATTGATATATCAAT  
TGAAACTCGTTGGTATTGCATTCCCTATTCTGGTTTCAGTTTACTTGAAGGGATTTTGTATTGGTTTGCATACGATAAT  
GGGGAGTACGTATTTTCATTTGATTTAGGTGATGAGATATTTTCATAGAATAGAATTGCCCTCGAGGAGAGAATCCGATT  
TCAAGTTTTATGGTATTTTTCTGTATAATGAATCCGTCACCTCGTATTGCTATCGTCATGAAGAGGATTGTGAATTATT  
TGAAATATGGGTAATGGACGACTATGATGGAGTTAAGAGTTCATGGACAAAACCTGCTAACCATTGGACCCCTTAAAGGAC  
ATTGATTATCCATTGACACTTTGGAAATGTGACGAGATTCTTATGCTTGGCTCATAT

>M\_domestica\_S1\_SFBB8\_MG458530

ATGTCCCAGGTGCGTGAAAGTGAACCTCCTGAAGATAGGATGGTTCGAAATCTTGTCCAGGTTGCCACCCAAGTCTCTGA  
TGCGATTCAAATGCATACGCAAACTTGGTGCACCTTATCAATAGTCCATGTTTTGTAGCCAAACACCTCAGCGATT  
AGTGGAACAACAACTCTCATCCTCCACTTGTATCCTTCTCAACTGTTCTAAGGCTCACGTTTGTCTCGGAAGAGAGTTGG  
AAACAAGGAGTTTTATGGTCCGTGATTAATCTTTCCATTGATGGTGTGAGCTTCATTATGATgTTGAGGACCTAACTA  
ATGTACCGTTTCTAAGGGATGACCAACATGAATTAGAGATTCACGGTTATTGCGATGGGATTATTTGTGTAACGGTAAA  
CGAAAATTTCTTTTTGTGCAATCCTGCAACGGGGGAATTCAGGCAACTTCCTGATTTCATGCCTTCTTCTACCCCTTCCC  
GGTGTAAAAGAAAAATTCGGATTGGAAACGACACTTAAAGGACTGGGATTTGGTTATGATTGCAAAGCTAAAGAATACA  
AGGTTGTGCGAATTATAGATAATATGATTGTGAGTATTCAGATGATGGAGAAACATATATCGAGCATATTGCTCTTCC  
TCACACTGCTGAAGTATACACCATGGCTGCTAACTCTTGGAAAGAGATCACGATTGATATATTAAGTAAAATATATCA  
TCATATAGCGAACCATATTCTTATTCAGTGTATTTGAAAGGGTTTTGTATTGGTTGTCATGCGATGTAGAGGAATACA  
TATTTTCATTTGATTTAGCTAATGAAATATCTGATATGATAGAATTGCCTTTTAGGGGAGAATTCGGTTTTAAGCGTGA  
TGGTATTTTTCTGTATAATGAATCCaTCACTTATTATTGCTCTAGTTACGAAGAGCCTTCCACATTATTTGAAATATGG  
GTCATGGATTACAATGACGGATTTAAGAGTCCATGGACAAAACCTTAACTGCTGGACCTTTTAAAGACATGGAGTTTC  
CATTGACACCTTGGAAACGTAACGAGCTTCTTATGATTACCTCCGATGGAAGAGTTGCTTCTTATAATTCTTGTAGCGG  
AAATTTCAAGTATCTTCATATTCTTGTATTATTAATGAGAATAGGGTTGTAGATTACGTGAAAAGTATTATTCTAGTC  
AAT

>M\_domestica\_S1\_SFBB11\_SFBB9\_MG458560

AAGTCTCTGATGCGGTTCAATTGCATACGCAAGTCTTGGTGCACCTCTCATCAATAGTCCAAGTTTTGGGGCCAAATACC  
TCAGCAATCTGTGGACAACAACTCTCATCCTCCACTTGTATCCTTCTCAACCGTACTCAGATGCACGTTTTCCCTGA  
CCAGAGTTGGAAATATGAACTTTATGGTCCATGATGAATCTTTCCAATTATAGTGTGAGCACAACCTTCATTATCAT  
TTTAAGGAACTAAATATACCGTTTCCAACGGAAGACCATCATCCTGTGCAAATTCACAGTTATTGCAATGGTATTGTAT  
GTGTAATAATAGGGAAAAGTGTTCGTATTTTATGCAATCCTGCAACACGTTGAATTCAGGCAACTTCCTGCTTCATGCCT  
TCTTCTACCTTCCCCTCCCAGGGAAAATTTCCAATTTGGAGACGATCTTTGAAGGATTAGGATTCGGCTATGATTACAAA  
GCTAAAGAATACAAGGTTGTGCAAAATATAGAAAATTGTGAGTATTCAGATGATGAGCGAAGATATTATCATCGTATTG  
CTCTTCTCACACGGCTGAGGTATACACCCTACTGCTAACTTGGAAAGAGATTAAGATTGAGATATCAAGTAAAAC  
CTATCAGTGTACGGTTCAGAATACTTGAAGGGATTTTGTCTATTGGCTTGCAAACGATGGCGAGGAATACATACTTTCA  
TTTTGATTTAGGTGATGAAATATTTTCATATAATAACAATTGCCTTCTAGGAGAGAATCTGGTTTTAAATTTTATAATATTT  
TTCTGTGTAATGAATCCATTGCTTCGTTTTGCTGTTGTTATGATCCAAAGAAAGAAGATTCTACATTATGTGAAACATG  
GGTAATGGACA

>M\_domestica\_S2\_SFBB11\_SFBB9\_MG458561

ATGTTGAACAAAATTGCCGAAATGTCCCAGGTGCATGACAGTGAACCTCCTGAAGATGGGGTGGTGCAAATCCTGTCTA  
GGTTGCCGCCAAGTCTTTGATGCGATTCAAATGCATACGCAAGTCTTGGTGCACCTCTCATCAGTAGTCCAAGTTTTGT  
GGCCAAATACCTCAGCGATTCCGTGGACAACAACTCTCATCCTCCACATGTATCCTTCTCAACCGTACTCAGATGCTC  
GTTTTCCCTGACCAGAGTTGGAAATATGAACTGTATGGTCCATGATGAATCTTTTCCATTATAGTGTGAGCACAACC

TTCATTATGATTTTAAGGACCTAAATATAACCGTTTCCAACGGAAGACCATCATCCGGTGCAAATTCATAGTTATTGCAA  
TGGTATTGTATGTGTAATAACAGGGAAAAGTGCTCGTATTTTATGCAATCCTGCAACACGGGAATTCAGGCAACTTCCT  
GATTCATGCCTTCTTCTACCTTCCCCTCCGGAGGGAAAATTTCCAATTGGAGACGATCTTTGAAGGATTAGGATTCGGCT  
ATGATAACAAAGCTAAAGAATACAAGGTTGTGCAAATTATAGAAAATTGTGAGTATTGAGATGATGAGCGAAGATATTA  
TCATCGTATTGCTCATCCTCATACGGCTGAGGTATACACCACGGCTGCTAACTCTTGAAAAGAGATCAAGATTGAGATA  
TCAAGTAAAACCTATCAGTGTTTTGTTCAGAATACATGAAGGGATTTTGTATTGGCTTGCAAGCGATGGTGAGGAAT  
ACATACTTTCATTTGATTTAGGTGATGAAATATTTTCATATAATACAATTGCCTACTAGAAGAGAATCCGGTTTTAAATT  
TTATAATATTTTTCTGTGTAATGAATCCATTGCTTCGTTTTGCTCTTGTATTGATCCAAATGATGAGGATTCTACATTA  
TGTGAAATATGGATAATGGATGACTATGACAAAAGTTAAGAGTTCATGGACAAAACCTTAACCGTTGGACCCTTAAAAG  
GCATTAATGAGAATCCATTGGCATTTTGGAAAAGTGACGAGCTTCTTATGGTTTTCTGTGATGGAAGAGTCACTCTTA  
TAATTCTAGTACCAAAAAACTCAGCTATCTTCATATTCTCCTATTCTCAATGAGGTTAGAGAGTTCCAAGCTCTTATT  
TATGTGAAAAGTATTGTTCCAGTC

>M\_domestica\_s1\_SFB12\_SFB10\_MG458573

AAATGCATACGCAAGTCTTGGTGCACCTCATCAATAGTCCAAGCTTTGTGGCCAAAACACCTCAACAATTCTGTGGATA  
ACAAACTCTCATCCTCCACTTGTATCCTTGTCAACCATTCTCAGCCTCACATTTTTCCAGACAAGAATTGGAAAACAAGA  
AGTTTTCTGGTCCATGATTAATATTTCCATTGATAGTGATGAGCACAGGCTTCATTATGATGTTGTGGACCTAAATATA  
CCGTTTTCCATTGGAAGATCATGATTTTGTTCAGATTACCGTTATTGCAATGGGATTGTATGTGTAATAGTAGGAAGTA  
AATTTCTTTTATGCAATCCTGCAACGAGGGAATTCATGCAACTTCCCATTTCATGCCTTCTTCTACCCCTGCTGAGGG  
AAAATTCGAATTAGATACAACCTTTGAAGCATTGGGATTTGGCTATGATTGCAAAGGTAAAGAATACAAGTTCGTGCAA  
GTTATAGAAAATTGTGAGTATTGAGATGATGAGCAAACATTTAATCATTGTACTACTCTTCCCTCACACGGCTGAGGTAT  
ACACCACGGCTGCTAACTCTTGAAAAGAGATCAAGATTGATATATCAAGCACAACCTATTCTTGGTCTTGTTCAGTGTA  
CTTGAAGGGATTTTGTATTGGTATGCAACGGATGACGACGAGGAATACGTACTTTTCGTTTTGATTTATGTGATGAGACA  
TTTCATAGAATACAACCTTCTTAGGGGAGAATCTGGTTTTACATTTTTTTATATTTTTCTTCGTAATGAATCCCTTA  
CATCTTTTTGCTCTCGTTACGATCGAAGTGGGGATTCTCAATCATGTGAAATATGGGTAATGGACGGTTACGATGGAGT  
TAAGAGTTCATGGATAAAAACCTTAACCGTTGGAGCCTTGCAAGGCATTGAGAAGCCATTGACATTTTGGAAAAGTGAT  
GAGCTTCTTATGCTTGACTCCGATGGAAGAGCCACCTCTTATAATTCTAGTACCGGAAAATCTCAATTATATTCATATTC  
CTCCTATTCTCAATAGGGTTGTAGATTTTCAAGTCTTATTTATGTGAAAAGTATTGTTCCAATC

>M\_domestica\_s2\_SFB12\_SFB10\_MG458574

ATGCTTGAAGTGAAGTCTTGAAGAAAGGGTGGTTGAAATCTTGTCCAAGTTGCCAGCCAAGTCTCTAACCGGATTCA  
AATGCATACGCAAGTCTTGGTGCACCTCATTAATAGTCCAAGTTTTGTGGCCAAAACACCTCAACAATTCCGTGGACAA  
CAAACCTCTCATCCTCCACTTGTATCCTTGTCAACCATTCTCAGCCTCACATTTTTCCAGACAAGAATTGGAAAACAAGAA  
GTTTTCTGGTCCATGATTAATATTTCCATTGATAGTGATGAGCACAGCCTTCATTATGATGTTGTGGACCTAAATATAC  
CGTTTCCATTGGAAGATCATGATTTTGTTCAGATTACCGTTATTGCAATGGGATTGTATGTGTAATAGTAGGGAAAAA  
TTTTCTTTTATGCAATCCTGCAACGAGGGAATTCATGCAACTTCCCATTTCATGCCTTCTTCTACCCCTGCTGAGGGA  
AAATTTGAATTGGATAACAACCTTTGAAGCATTGGGATTTGGCTATGATTGCAAAGGTAAAGAATACAAGGTTCGTGCAA  
TTATAGAAAATTGTGAGTACTCAGATGATGAGCAAACATTTAATCATTGTACTACTCTTCCCTCACACGGCTGAGGTATA  
CACCATGGCTGCTAACTCTTGAAAAGAGATCAAGATTGATATATCAAGTACAACCTATTCTTGGTCTTGTTCAGTGATC  
TTGAAGGGATTTTGTATTGGTATGCCACGGATGACGAGGAATACGTACTTTTCATTTGATTTATGTGATGAGACATTT  
ATAGAATACCATTCCCTTCTATGGGAGAATCCGGTTTTACGTTTTTTTTATATTTTTCTTCGTAATGAATCCCTTACATC  
TTTTTGCTCTCGTTACGATCGAAGTGGGGATTCTCAATCATGTGAAATATGGGTAATGAACGACTATGATGGAGTTAAG  
AGTTCATGGACAAAACCTCAACTGTTGGACCCCTTCAAGGCATTGAGAAGCCATTGACATTTTGGAAAAGTGACGAGC  
TTCTTATGCTTGCTTCCGATGGAAGAACCACCTCTTATAATTCTAGTATTGGAAAATCTGAAGTATGTTTCATATTCCTCC  
TATTCTCAATAAGGTTGTAGATTTCCAAGCTCTAATTTATGTGAAAAGCATTGTTCCACTCAAG

>M\_domestica\_s1\_SFB9\_SFB11\_MG458537

AAATGCATACACAGTCTTGGTCTCCCTCATCAATAGTCTAAGTTTTGTAGGTAAACACCTCAGCAATTCCGTGGACA  
ACAAACTCTCATCCTCCACTTGTATCCTTCTCAACCGTTCTCAGGCCACATTTTTCCAGACCAGAGTTGGAAAACAAGA  
AGTTTTCTGGTCCATGATTAATTTTTCCATTGATAGTGATGAGAACAACCTTCATTATGATGTTGAGGACCTAAATATA  
CCGTTTTTCATTGAAAGATCATGATTTTGTACTGATTTTTGTTATTGCAATGGGATTGTCTGTGTAGAAGCAGGGAAAA  
ATGTTCTTTTATGCAATCCTGCAACGAGGGAATCCAGGCAACTTCCCATTTCATGTCTTCTTCTCCCTCCCTCTGA  
GGGAAAATTCGAATTGGAGACGAGCTTTCAAGCATTGGGATTTGGCTATGATTGCAATGCTAAAGAATACAAGGTTGTG  
CGAATTATAGAAAATTGTGAGTATTGAGATGATGAACGAACATTTTATCATCGTATTGCTCTTCCCTCACACGGCTGAGT  
TATACACCACAATTGCTAACTCTTGAAAAGAGATCAAGATCGATATATCAAGTACAACCTATTCTTGTTCATTCAGT  
GTTTCATGAAGGGATTTTGTATTGGTATGCAACGGGGGGCGAGGAATACATACTTTCTTTTGTATTTGGTGTGACACA  
TTTCATAGAATACAACCTGCCTTCTAGGAGAGAATCCGGTTTTAGGTTTTATTATATTTTTCTGCGAAATGAATCCCTTG  
CTTCTTTTTGCTCTCGTTACGATCGGAGTGAGGATTCTGAATCAAGT

>M\_domestica\_s9\_SFB11\_AB539862

ATGTCTCATGTGCGTCAAAGCAAACACCTGAAGATAGGGTAATTGAAATCTTGTCCAGGTTGCCACCCAAGTCTCTAA  
TGCGGTTCAAATGCTTACACAAGTCTTGGTTCTCTCATCAATAGTCTAAGTTTTGTGGACAAAACACCTCAGCAATTC

CGTGGACAACAAACTCCCATCCTCCACTTGTATCCTTCTCAACCGTTCCTCAGGCTCATATTTTCCCAGACCAGAGTTGG  
AAACAAGAAGTTTTCTGGTCCATGATTAATTTTTCCATTGATAGTGATGAGAACAACCTTCATTATGATGTTGAGGACC  
TAAATATACCGTTTTCCATTGAATGATCATGATTTTGTACTGATTTTTGGTTATTGCAATGGGATTGTCTGCATTGAAGC  
AGGGAAAAATGTTCTTTTATGCAATCCTGCAACGAGGGAATTCAGGCAACTTCCCATTGATGTCTTCTTCTACCTTCC  
CCTCCTGAGGGAAAATTCGAATTGGAAACGAGCTTTCAAGCATTGGGATTTGGCTATGATTCCAACGCTAAAGAACACA  
AGGTTGTGAGAATTATAGAAAATTGTGAGTATTCAGATGAAGAACGAACATTTTATCATCGTATTGCTCTTCCCTCACAC  
GGCTGAGTTATACACCGCAACTGCTAACTCTTGGAAAGAGATCAAGATTGATATATCAAGTACAACCTATTCTTGTCT  
CGTTCAGTGTTCATGAAGGGATTTTGTATTGGTATGCAACGGATGGTGAGGAATACATACTTTCTTTTATTGATTAAGTG  
ATGACAAGTTTCATATAATAACAACCTGCCCTCTAGGAGAGAATCCGGTTTTAGGTTTTATTATATTTTTTATGCGAAATGA  
ATCCCTTGCTTCTTTTTTGTCTCGTTACGATCGGAGTGAGGATTCTGAATCATGTGAAATATGGGTAATGGACGACTAC  
GACGGAATTAAGATCATGGACAAAACCTTTAACCATTGGACCCTTACAAGGCATTAAGAAGCCATTGACATTTTGGGA  
AAAGTGATGAGCTTCTTATGCTTGACTCTGATGGAAGAGCCACCTCTTATAATTCTAGTACCGGAAATCTCAATTATAT  
TCATATTCCTCCTATTCTCAATAGGGTTGTAGATTTTGAAGTTCTTATTTTATGTGAAAAGTATTGTTTCATGTCAAG

>M\_domestica\_S1\_SFBB10\_SFBB12\_MG458550

ATGTCCCAATTGCATGAAATTGAATCTCCTGAAGATAAGGTGGTTCGAAATCCTGTCCAGGTTGCTGCCCAAGTCGCTGA  
TGCGATTCAAATGCATACGCAAGTCATGGTGCATCTCATCAATAGTCCAAGTTTTGTAGCCAAACACCTCAACAATTC  
TATGGACAACAAACTCTCATCCTCCACTTGTATCCTTCTCAACCGTTCCTCAGGCTCACATTTTTTCCCAGACCAGAGTTGG  
AAACAAGAAGTTTTCTGGTCCACGATTAATCTTTCCATTGATAGCGATGAGCATAACCTTTATTATGATGTTGAGGACC  
TAATATACCGTTTTCCATTGGAAGATCATGATTTTGTACTGATTTTTGGTTATTGCAATGGGATTATTTGTGTAGATGC  
AGGGAAAAATGTTCTTTTATGCAATCCTGCAACGAGAGAATTTAGGCAACTTCCCATTGATGCCTTCTTCTACCCCT  
CCCAAGGGAAAATTCGAATTGGAAACGACCTTTCAAGCGTTGGGATTTGGCTATGACTGCAATTCGAAAGAATATAAGG  
TTGTGCGAATTATAGAAAATTGTGAATATTCAGATGATGAGCAAACATTTTCATCATCGTATTGCTCTTCCCTCACACAGC  
TGAGGTATACACCACGGCTGCTAACTCTTGGAAAGAGATCAAGATTGATATATCAAGTCAAACCTATCATTGTTCTTGT  
TCAGTGTACTTGAAGGGATTTTGTATTGGTTTGAAGCGATAGCGAGGAATACATACTTTTCAATTTTATTAGGTGATG  
AGACATTCATATAATAACAATTCCTTCTAGGAGAGAATCCGGTTTTACGTTTTGATTATATTTTTTCTCCGAAATGAATC  
CCTTGCTTCTTTTTTGTCTCTCCCTACAGTCCAAGTGAGGATTTCTAAATTTTGGAAATATGGGTAATGGATGACTATGAT  
GGAGTTAAGAGTTCATGGACAAAATTCCTAACTATTGGACCCTTTAAAGGCATTGAGTATCCATTGACACTTTGGAAAT  
GTGACGAGCTTCTTATGCTAGCCTCCGATGGAAGAGCCATCTCTTATAATTCTAGTATCGGAAATCTCAAGTATCTTCA  
TATTCTCCCATATCAATGAGGTTGTTGATTTGAGGCTCTTAGTTATGTGAAAAGTATTGTTCCGATCAAG

>M\_domestica\_S1\_SFBB1\_SFBB13\_MG458439

ATGTCCCAAGTGCGTGAAAGTGAAACTCCTGAAGACAGGGTGGTTCGAAATCCTGTCCAGGTTGTCGCCCAAGTCTCTGT  
TGCGATTCAAATGCATACGCAAGTCTTGGTGCACCTCTCATCAATAGTCCAAGTTTTGTGGCCAAACACCTCAACAATTC  
CATGGACAACAAACTATTATCATCCACTTGCATCCTTCTCAGCCGTTCTCAGGCTCATGTTTTCCCAGGATAACAGTTGG  
AAACCAGAAGTTTTCTGGTCCATGATTAATCTTTCCATTGATAGTGATGAGCACAACCTTCATTATGATGTTGAGGACC  
TAAATATACCTTTTCCATTGGAAGGTCATGATTTTGTACAGATTGAGGGATATTGCAATGGGATTGTCTGTGTAATAGC  
AGGGACAAGTCTTTATTTGATAAATGTTCTTTTATGCAATCCTGCAACGGGGAAAATTCAGGCAACTTCCCCCTTCTGC  
CTTCTTTTACCTTGCCGTCCTAAGGGAAAATTCCAATTGGAGTCGATCTTTGGAGGATTGGGATTCCGTTATGATTGCA  
AAGCTCAAGAATACAAGGTTGTGCAAATTATAGAAAATTGTGAGTACTCAGATGATCAGCAATACTATTATCATCGTAT  
TGCTCTTCCCACACGGCTGAGGTATATACCATGGCTGCTAACTCTTGGAGAGTGATTAAGATTGATATATCAAGTGAA  
ACCTATCATTATCTTCTTTCAGTGTACTTGAATGGATTTTTTTTATTGGTTTTGCAAATGATGGCGAGAAATACATACTTG  
CATTTGATTTAGGTGATGAGATATTTTCATAGAATAACAATTGCCTTCTAGGAGAGAATCAGATTTTGGATTTTCTAATAT  
TTTTCTGTGTAATAAATCGATTGCTTCTTTTTTGTCTTGTGCGACCCAAGTGATGAGGATTTCTACATTATGTGAAATA  
TGGGTAATGGATGATTATGATGGAGTTGAGAGATCATGGACAAAACCTTTAACCTTTGGACCCTTAAAAGACATTGAGA  
ATCCATTTACATTTTGGAAAACCTGATGAGCTTCTTATGGTTGCCCGCGGTGGAAGAGCCACCCTTATAATTCCAATAC  
CAGAAATCTCAACTATCTTCAATATCCTCCTATTCTCAATGAAGTTAGAGATTTTGAAGCTCTTATTTTATGTGAAAAGT  
ATTGTTTCAGTGAGT

>M\_domestica\_S1\_SFBB14\_MG458600

ATGTTCCATATGCGTTTTAAGCGAAAACCTCCTGAAGATAAGGTGGTTCGAAATCCTGTCAAGGTTGCCACCCAAGTCTCTGA  
TGCGATTCAAATGCACAAGCAAGTCTTGGTGCACCTCTTATAAATAGTTCAAGCTTTGTTGCCAAACACCTCAGCAATTC  
CGTAGACAACAAACTCTCATCCTCCACTTGTATCCTTCTCAACCGTTCCTCAGATGCCGTTTTTCCCAGACAAAAGTTGG  
AAATATGAAATTTTATGGTCCATGATTTATCTTTCCATTATAGTGATGAGCACAACCATCACTATGATGTTGAGGACC  
TAAACATACCGTTTTCCATTAGAAGATCATCATCCTGTACAGATTACCGGTTATTGCAATGGGATTGTCTGTGTGATAGC  
AGGGAAAACCTGTTATTATTTTATGCAATCCTGGAACCGGGGAATTCAGGCAACTTCCCATTGATGCCTTCTTGTACCC  
CTTCCCAAGGAAAATTCCAATTGGAGACGATTTTTTGGAGGATTGGGATTTGGTTATGATTGCAAAGCTAAAGAATACA  
AGGTTGTGCAAATTATAGAAAATTGTGAGTATTCAGATGATGAGCGAACATTTTATCATAGTATTCCTTCTTCCCTCACAC  
GGCTGAGGTATACACCATAGCTGCTAACTCTTGGAAAGAGATTAAGATTGATATATCAACTAAAACCTGTCCAGTTCT  
TGTTTCAGTGTACTTGAAGGGATTTTGTATTGGTTTTGCAAGCGATGGCGAGGAATACATACTTTTCAATTTGATTTAGGTG  
ATGAGATATTTTCATAGAATAACAATTGCCTTCTAGGAGAGAATCCAGTTTTTAAAGTTTTTGTATCTTTTTTCTGTATAATGA

ATCCGTCACCTTCTTATTGCTCTCATTATGATCCAACCTGAGGATTCTAAATTATTTGAAATATGGGTAATGGACGATTAT  
GATGGAATTAAGAGTTCATGGACAAAACCTCCTAACTGTTGGACCCTTTAAAGGCATTGAGTATCCA

>M\_domestica\_SFBB15\_MG458628

AAGTCCCTGATGCGGTTCAAATGCATACGCAAGTCTTGGTGCACCTCATCAATAGTCCAAGTTTTGTGGCCAAACACC  
TCAACAATTCCTGGACAACAAACGCTCATCCAACACTTGTATCCTTCTCAACCGTTCTCAGATGCCCCGTTTTCCCGA  
CAACAGTTGGAAATATGAAGTTTTTTGGTCCATGATTAGTCTTCCATTGATAGTGATGAGCACAACCTTTATTATGAT  
GTTGAGGACCTAAATATAACGTTTCCAATGGAAGACCATCATCCTGTAGTGATTACCGTTCATTGCAATGGGATTGTCT  
GTGTAATAACAGGGAAAAATGTTGTTTTATGCAATCCTGCAATTGGGGAATTCAGGCAACTTCCCGATTGCCCTCTTCT  
ACCCCTTCCAACATAAAATTTCCAATTGGAGACGAGCTTTGGAGGATTGGGATTTCGGCTATGATTGCAAAGCTAAAGAA  
TACAAGTTGTGCGAATTACAGAAAATTTGTGAGTATTGAGATGCTGAACGAACATATTACCATCGTATTGATCTTCCCTC  
ATACGGCTCAGGTATACACCACGACTGCTAACTCTTGGAAAGGAGATCAAGATTGATATATCAAGTAAAAGCTATCTTGA  
TTCTTGCCAGTGTACTTGAAGGGATTTTGTATTGGATTGCAAATGATGGCGAGGAATTCATACTTTCAATTTGATTTA  
GGTGATGAGATATTTTCATAGAATACAAATGCCTCTTGGGAGAGAAGCCAGTTTTGCAGTTTTGTAATCTTTTTCTGTATA  
ATGAATCCCTTGCTTGTTTTTGCTCTCTTTACGGTCCAAGTGACAATTCTAGATTATTTGAAATATTTGAAATATGGGT  
AATGGAC

>M\_domestica\_S1\_SFBB16\_MG458629

ATGTCTCAGGGGCATGAAAGTGAAAGTCTGAAGATAGGGTGGTGCAAATCCTGTCCAGGTTGCCGCCAAGTCTCTGA  
TGCGGTTCAAATGCATACGCAAGTCTTGGTGCACCCTCATCAATAGTCCCTCGTTTTGTGGCCAAACACCTCAACAATTC  
CGTGGAACAACAACTATCATCCTCCACGTGATTCTTCTCCACCGTTCTCAGACGCCCATTTTTCCCTTGCGACAGTTGG  
AAACGAGAATCTTCTGGTCCATGATTAATTTTTCCATTGATAGTGATGAGAGCAACTTTCATTATGATGTTGAGGACC  
TAACTAATGTACCGTTATTGCAATGGGAAGACCATCATGAAGTAGAGATTACCGGTTATTGCAATGGGATTGTCTGTGT  
AACAGTAGGGGAATATTTCTTTTTGTGCAATCCAGCAACGGGGGAATTCAGTCAACTTCCAATTCACGCCTTCTTCTA  
CCCCCTTCCAGGGGAAAAGGAAAAATTTGGATTGGAAACGACCGTTAAAGGATTGGGATTGGCTATGATTGTAAAGCTA  
AAGAATACAAGTTGTGCGAATTATAGAAAATTTGATTGcGAGTATTGAGATGGTGAAGAAACATATATTGAACATAc  
cGCTCTTCTCACACGGCTGAGGTATACACAACAACTGCTAACTCTTGGAAAGAGATTAAGATAAATATATCCAGTAAA  
ATATTATCATTTTACAGCTATCCCTATTCTTGTTCAGTGTACTTGAAGGATTTTGTATTGGTTGTCAAGCGATGACG  
AGGAATACGTATGTTCAATTTGATTTTGGTGTGAGATATTCGATAGGATAGAATTGCCCTTCTAGGAGAGAATCTGGTTT  
TAAGCTTGATGGTATTTTTCTGTATAATGAATCCATCACTTATTATTGCACTAGTTACGAAGAGCGTTCCAGATTATTT  
GAAATATGGGTAATGGATAACTATGACGGAGTTAAGAGTTCATGGACAAAACATTTAACAGCCGGACCCTTTAATGGCA  
TTGAGTTTCCACTGACACTTTGGAAACATGACGAGCTTCTTATGATTGCCTCCGATGGAAGAGCCACCTCTTATAATTC  
TAGTACTAGAAATCACAAGTATCTTCATATTCCTGTTATTATT

>M\_domestica\_S1\_SFBB17\_MG458640

AAATGTATACGAAAGTCTTGGTGCAATCTGATCAATAGTCCACGTTTTTGTGGCCAAACACCTCAGCAATTTCTGTTGACA  
ACAAACTCTCGTCCACCACTTGTATCCTTCTCAACCGTTCTCAGACTCATGTTTTCCAGACAATAGTTGGAAACAAGA  
AGTTTTCTGGTCCATGATCAATATTTCTATTGATAGTGATGAGCACAACCTTCATTATGATGTTGAGGACCTAAATATA  
CCATTTCCGCTGGAAGATCATGATTACGTATTGATTCCCGTTATTGCAATGGGATGTTTTGTGTGACAGCAGGTA  
ATATTCTTTTATGCAATCCTACAACGAGGGAATTCATGCGACTTCCCAGTTCATGCCTTCTTCTACCTTCCCGTCCCAA  
GGGAAAATTCGAATTGGAAACGGTCTTTCGAGCATTAGGATTTGGCTATGATTGCAAAGCTAAAGAATACAAGGTAGTG  
CAAATATAGAAAATTTCTGAGTATTGAGATGATGAGCGAACATATTATCATCGTATTCCTCTTCTCACACGGCTGAGG  
TATACACAACGGCTGCTAACTCTTGGAGAGAGATCAAGATTGATATATCAACTAAAACCTTATTCTGTTCTTGTCAAGT  
GTACTTGAAGGGATTTTGTATTGGTATGCAACGGATGCTGAGGAATACATACTTTCATTTGATTTAGGTGATGAGATA  
TTTCATAGAATACAATTGCCCTCTAGAAGAGAATCCGGTTTTAAGTTTTATTATATCTTCTTCTGTAATGAATCCCTTG  
CTTCGTTTTGCTCTCGTTACGATCGAAGTGATAAGTCTGAATCATGT

>M\_domestica\_S1\_SFBB18\_MG458650

ATGTCCCAGATGCGGAAAAATGAAACTCCTGAAGATAAGGTGGTTGAAATCCTGTGAGGTTGCCGCCAAGTCTCTCA  
TGCGATTCAAATGCATACACAAGTCTTGGTGCACCTCATCAAAGTTCAAGTTTTGTGGCCAAACACCTCAGTAATTC  
TATGGACAACAACCTCAACCTCCACTTGTATCCTTCTCAACCGTTCTGAAATGCCGTTTTCCCGGACGACAGTTGG  
AAGTATGAAGTTTTATGGTCCATGATTAATCTTTCCATTGATAGTGATGATCACAACCTTCATTATAATGTTGAGGACC  
TAAATATACCGTTTTCCAATGGAAATACCATCATCCTGTATTGATTACCGTATTGCGATGGTATTTTCTGTGTAATTAC  
AGGTGAAAATGTTGTTTTATGCAATCCTGCAATTTGGGGAATTCAGGCAACTTCCCGATTTCATGCCTTCTTCTACCTGCT  
CCTCCTGAGAGAAAATTCGAATTGAAACGACCTTTCGGGCATTGGGATTTGGCTATGATTGCAAAGCTAAAGAATACA  
AGGTTGTGCGAATTATAGAAAATTTGTGAATATTCTGATGATGAGCAAACATATAATCATCGTATTTCTTCTTCTTACAC  
TGCTGAGGTATACACAACGACTGGTAACTCTTGGAAAGAGATCAATATTGATGATCAAGTAAAGCCTATCCATGTTCT  
TGTTCACTGTACTTGAAGGGATTTTGTATTGGTTTTGCAACAGATGGCGAGGAATACATACTTTCAATTTGACTTGGGAG  
ATGAGATATTTTCCAGAATACAATTCCTGCTAGGAAAAGAAATCCGGTTTTAAGTTTTATAGTCTTTTTCTGTATAATGA  
ATCAGTCACTTCTTATTGCTCTCATTACGATCCAAGCGAGGATTCTAAATATTTGAAATATGGGTGATGGACAACCTAT  
GACGGAGTTAAGAGTTCATGGAAG

>M\_domestica\_S9\_SFBB19\_MG458661

ATGGTCGAAATCTTGTCCAGGTTGCCGCCCAAGTCTCTGATGCGATTCAAATGTATACGAAAGTCTTGGTGCAATCTGA  
TCAATAGTCCACGTTTTTGTGGCCAAACACCTCAGCAATTTCTGTGGACAACAACTCTCATCGTCTACTTGTATCCTTCT  
CAACCATTTCTCAGGCTCACCCCTCCCGAGAACAGAGTTGGAAACAAGAAGTTTTATGGTTCATGATTAATCTTTCCATT  
GATAGTGATGAGCACAATCTTCATTATGATGTTGAGGACCTAACTAATGTACCGTTTTATGAGGGATGACTATGATGATA  
TAGAGATTCACGGTTATTGCAATGGGATCGTCTGTGTAACATTAGGGGAAAATTTCTTTTTATGCAATCCTGCAACGGT  
GGAATTCAGGCAACTTCCCGATTTCATGTCTTATTCTACCCCTTCCCGGGGAAAAGGCAAATTCGGATTGGAAACGACC  
GTTAAAGGATTAGGATTTGGCTATGATTCTAAAGCTAAAGAATACAAAGTTGTGCGAATTATAGAAAATTATGATTGTG  
AGTATTCAGATGGTGAAGAAACATATATTGAGCATATTGCTCTTCCCTTACACGGCTGAGGTATACACCACGGCCGCTAA  
CTCTTGAAAAGAGATCAAGATTGAATCAAGTAAAATATTATCATCTTATGGCTATCCCTATTCTTGTTCAGTGTACTTG  
AAGGGATTTTGTATTGGTGGTCTGGCGATGAACAGGAATACATATTTTCATTTGATTTAGCTGGTGAGATATTTGATA  
GGATAGAATTGCCTTCTAAAAGAGAATCCGGTTTTAAGCGTGATGGTATTTTTCTGTATAATGAATCCATCACTTATTA  
TTGCACTAGTTACGAAGAGAGTTCCAGATTATTTGAGATATGGGTATTGGATGACTATGACGGAGTTAAGAGTTCATGG  
ACTAAACACTTAACCGCTGGACCATTTAAAGGCATTGAGTATCCATTGAAACTTTGGAAATGTGACGAGCTTCTTATGC  
TTGCCTCTGATGGAAGAGTCACTTCTTATAATTCTAGAACCGGAAATCTCAAGTATCTTCATATTCTTATTATTTAA  
TAGAAAATAGGGTTGTAGATTACGTTAAAAGTATTGTTCCAATCAAC

>M\_domestica\_S28\_SFBB20\_MG458663

AAATGCATTCGCAAGTCTTGGTGTACTCTTATCAATAGTCCAAGTTTTGTGGCCAAACACCTCAACAATTCCGTGGACA  
ACAAACTATCATCCTCCACTTGCATCCTTCTCACACGTTCTCAACCTCTTGTTTTTCCCGGACAACAGTTGGAAACCAGA  
AGTTTTCTGGTCCATGATTAATCTTTCCATTGATAGTGATGAGCACAACCTTTATTTATGATGTTGAGGACTTAAGTATA  
CCGTTTTCTTTGGAAGATCATGATTTTGTACAGATTGACGGTTATTGCAATGGGATTTGTCTGTGTAAGAGCATGGAAAA  
CTCTTCATTTGGTAAATGTTCTTTTATGTAATCCTGCAGCGCGGGAATTTAGTCAACTTCTCTTCCATGCCTTCTTCA  
ACCTTCCCGTCCCAAGAGAAAATTTCAATTGGAGGCGATCGTCATAGGATTGGGATTTGGCTATGATTGCAAAGCTAAA  
GAATACAAGGTTGTGCAAAATATACAAAATTGTGAGTATTCAGATGATGAGCAATACAATTATCATCGTATTGATCTTC  
CTCACACGGCTGAGGTATACACCACAGCTGCTAACTCTTGGAGAAAAGATCAAGATTGATATATCTAGTGGAACCTATGA  
TTGTTCTTGTTCACCGTACTTGAAGGGATTTTGTATTGGTTTGAACCGATGGCGAGAAAATACATACTTTTCATTTTAT  
TTAGGTGATGAGATATTTTCGTAGGATACAATTGCCTTTTCGGAAAGAATCCGATTTTAAGTTTTCTAATATTTTTCTGT  
GTAATGAATCCATTGCTTCTTTTGTCTTGTGCGATCCAAGTGATGAGGATTCTACATTATGT

>M\_domestica\_S28\_SFBB22\_MG458665

GAAACTCTTGAAGATAAGGTGGTTCGAAATATTGTCTAGATTGCCACCCAAGTCTCTGATGCGATTCAAATGCATGCGCA  
AGTCTGGTGCCTCTCATCAATAATCCAAGTTTTGTGACCAAACACCTCAACAATTCCTGGACAACAACTCTCATC  
CTCCATTTGTATTTTTCTCAACCGTTCTCAGGCGCACATTTTCCAGACCAGAGTTGGAAACAAGAAGTTTTCTGGTCC  
ATGATTAAGCTTTCCATTGATAGTGCTGATCACAACCTTCATTATGATGTTGAGGACCTAAATATAACCATTTCCATTGG  
AAGATCACGATTTTGAATGATTTTTGGTTATTGCAATGGAATTCCTGTGTAGAAAGCAGGAAAAATGATTCTTTTATG  
CAATCTACAACGAGGGAATTCAGGCAACTTCCCGTTTTCATGCCTTCTTCTACCCCTCCCAAGGGGAAAATTCGAATTG  
GAAACGACCTTTCAAGCATTGGGATTTGGCTATGATTGCAATGCTGAAGAATACAAGTTGTGCGAACTATAGAAAATT  
GTGAGTATTCAGATGATGAGCAAACATTTTATCATCGTATTGCTCTTCTCACACGGCTGAGGTATACACCACGACTTC  
AAATCTTGGAAAGAGATCAAGATTGATATATCAAGTGATACGTATTCATGTTCTTGTTCAGTGTACTTAAAGGGATTT  
TGTTATTGGTATGCAAGGGGTGGCGAGGAATACATACTTTTCATTTTCATGTAGGTGATGAGACATTTTCATATAATA  
TTCTTCTAAGAGAGAATCCGGTTTTACATTTGATTATATTTTTCTCCGAAATGATTCCTTGTCTCTTTTTTGTCTCC  
TCACTATCCTAGTGAGGATTCAAAATTTTGAAGTATGGGTAATGGACGACTATGATGGGATTAAGAGTTCATGGACA  
AAACTCCTAACAGTTGGACCTTTAAAGGCATTGAGTATCCATTGACACTTTGGAAATGTGATGAGCTTCTTATGCTTG  
CCTCTGGTGGAAAGAGCCATATCTTATAATACTAGTACCGGAAATCTCACGTCTCTTCATATTCTTCCAATTATCAACAG  
GGTTGTAGATTTCAAAGCTCTTATTTATGTGAAAAGTATTGTTCCAATCAAG

>M\_domestica\_S25\_SFBB23\_MG458666

AAAGAATACAAGGTTGTGCAAATATAGAAAATTGTGAGTATTCAGATGACCAGCAATACTATTATCATCGTATCGCTC  
TTCTCACACGGCTGAGGTATATACCATGGCTGCTAACTCTTGGAGAGTGATCAAGATTGATATATCAAGTGAAACCTA  
TCATTATTCTTCTCAGTGTACTTGAATGGATTTTTTTATTTGGTTTGAATTTGATGGCGAGAAAATACGTACTTTCATTT  
GATTTAGGTGATGAGATATTTACAGAATACAATTGCCTTCTAGGAAGGAATCCGATTTTGGATTTTCTAATATTTTTT  
TGTGTAATAAATCGATTGCTTCTTTTTGCTCTCGTTGCGACCCAAGTGATGAGGATTTACATTATGTGAAATATGGGT  
AATGGATGATTATGACGGAGTTGATAGATCATGGACAAAACCTTAACTTTGGACCTTAAAAGACATTGAGAATCCA  
TTTACATTTTGGAAAACCTGATGAGCTTCTTATGGTTGCCGCCGGTGGAAAGAGCCACCCTTATAATTTTCAGTACCGGAA  
ATCTCAACTATCTTCATATTCTTCTTCAATGAAGTTAGAGATTTTCAAGCTCTTATTTATGTGAAAAGTATAGT  
TCCAGTCAAG

>M\_domestica\_S1\_SFBB24\_MG458668

AAGTCTCTGATGCGATTCAAATGCATACGCAAGTCTTGGTGCCTCTCATCAATAGTCCAAGTTTTGTGGCCAAACACC  
TCAACAATTTCTGTGAACAACAACTCTCATCCTCCACTTGTATCCTTCTCAATCGTTCTCAGCCTCACGTTTTTCCGGA  
CAATAGTTGGAAGCTAGAAGTTTTCTGGTCCATGATTAATCTTTCCATTGATTGTGATGAGCACAACCTTCATTATGAC  
GTTTTCCGACCTAAATATAACCGTTTTCCACTGAAAGATCATGGCTTTGTACAGATCGACGGCAATTGCAATGGGATTTTTT

GTATAATAGCAGGGAAAAGTCGTTATTTTATAAATGTTCTTTTATGCAATCCTGCAATAGGGGAATTCAGGCAACTTCC  
CCATTCATGCCTTCTTCTACCTTTCCTCCCAAGGGAAAAATTCGAATTGGAGACGATCTTTGCAGGATTGGGATTTGGC  
TATGAATTCAAAGCTAAAGAATACAAGGTTGTGCAGATTATACAAAATTGTGAGTATTCAGATGATTTGAGAACATATT  
ATCATCATATTGCTCTTCTCACAGGGCTGAGGTATACACCACGGCTGCTAATTCTTGGAGAGAGATCAAGATTGATAT  
ATCAAGTGAAACCTATCATTTTTCTTGCCTGACTTGAAGGGATTTTGTATTGGTTTGCACCGATGGAGAGGTA  
TACATACTTTCATTTGATTTAGGTGATGAAATATTTTCATAGAATACTATTGCCTTCGAGGAGAGAATCCAACCTTTGAGT  
TTTGTAACTTTTTTCTGTGTAATGATTCCATTGCTTCTTTTGTCTTGTGGGATCCAAGTGTGAGGATCGTACATT  
ATGCGAAAATATGGATAATGGGTGACGGAGTTAAGAGTTTATGGACAAAACCTCTAACCTTTGGACCCTTGAAAGGCATT  
GAGAAACCATTTGCGTTTTGGAAAAGTGACGAGCTTCTTATGGTTTCTTCGATGGAAGAGCTACCTCTTATAAATTCTA  
GTACCGGAAATCTCAACTATCTTCATGTTCTCTATTCTCAATCAAGTTAGAGATTTCCAAGCTCTTATGTATGTGA  
AAGTATTGTTCCAATCAAG

>P\_axillaris\_S19\_SLF11\_AB933047

ATGGTAGACGGAATTATGAAGAAGTTTCACGAAGATGTGGTGATTTATATTCTGTTACGGCTGCCAGTGAAAATCCCTCA  
TGCGATTGAAATGCATCTCTAAAACATGGTACTCTCTCATGCAATCATCAACCTTCATCAATCTTCATCTCAATCGTAC  
TACAACCTATAATGATGAATTAATTTTTCTTCAAGCGCTCCATCAAATTAGAACCAGACCTTTTTTAAAAACAAACTATCT  
TTTTCTTTATAGTGACAATGAGGATGACCTAACCCCTGTTTATCCAGATATAGATGTGCCATATTTGACCTCTGATTATT  
GCAGTCGTTTTTCATCAGCTTATTGGTCTTGTCTGTTGATTGCTTTGACAGACTTTACAGTTATTGTGTTATTGAA  
TCCAGCCACTAGAAAATACAGGCTTCTCCCAGGCAGCCCTTTTGTGTTGTCCAAAGGGTTTCACATTTGTCCAGAGAGGT  
GTTGGGTTTGGCTACAGCACGGCAGAAAATTATTACAAGTTAGTTAGGATTTTTGAAAGTGTATACGGATCCTTATGATA  
GGGATCTCGATGCGAGGCATTCCAAAGTTGAGGTATATGATTCGTGCACTGATTGTTGGAGAGACCTGGATCTTACGGT  
AAAGTTGCTACCAAAGTGCGGAGATTGCTTGTCTGAGATATTTTACAAGGAAAATATTTTCATTGGTGTGCACATGAC  
GACACAGTGTGATTCTATGTTTTGACATTAGCCTTGAAAATTTTCATTACATGAAAATTGCCTGATCATTGTCAATTTCT  
GGGACAATAAAGGTTATGGCCTCGCAGTACTAAATAACTATCTAACGTTTATTACCTATCCCAATCCAAGATGCGCGCT  
TGATCCTGGACAAGAGTTTACGGATATTTGGATAATGGAGGAGTACGGTGTAAACGGGACCTGGATTAAGAAAATACACA  
ATCAGACCTCTTCCAATTGAATCCTCATTAGCAATTTGGAAGGATAATTTATTACTTCTTCAGAGCATAAGTGGAACTT  
TGAGCACATATAATCTTAATTCCGATGAACTCAAGGAATTC AACCTCCAAGGTTTTACTAGTACTCTGAGACTTGTAGT  
TTACAAGGAAAGCTTGACCATAATTC AAGAGAAAGCGATAATGGCACTGAAGTTCAAATTTTTTAGAGTATGACAAAT  
TTGACT

>P\_hybrida\_S22m\_SLF8A\_AB933129

ATGTTGGATGGAATTATGAAAATTTGCCTAAAGATATAGCAATGTATATACTTTTGAGGTTTCCAGTGAAAATCTCTTT  
TACGATTCAAATTCATCTCTAAAAGTTGGTCCACTCTCATAGAATCCTCCACATTTATCAATATTCATCTCAAGCGCGC  
TACAACAACCAATAATGAATTTCTTCTTTTCAGCCGCTCCTATAGAGAGGAAACAGAAGGATTTAAAAATGTCTTATCT  
ATTCTTCTGGTGGCAACAACGACGATCTTATGCCCGTTGTTTCAGATCTGGAACAACCATATCTAACCTTCACTGAAT  
ACTATCTTTTCAATAAACTCGTTGGCCCTTGTAATGGTTTGTATTGTTCTAACAGATTTTGAGATTATTGTCTTATTTAA  
TCCAGCTACTAAAATTACATGCTAATCCCGCCTAGCCCTTTTGTGTTGTCCAAAGGGTTTTTCATCGCTCCTTTAGAGGG  
GGTGTGGGTTTGGTTTTGACTCTATTGTGAAGGACTACAAGTTTGTCCAGATTTTCAAAGTTTTTAAAAATTTCTGAAT  
GGGGACCCGATGAGAAAGAGCAAAAAGTAGAGGTTTATGATATGCGTATTGATTCTTGGAGAGATTTGAATCATGTGGA  
TCTACAGTTGCCCTACTGTGTATTATTATCCATGTTTTGAGATGCTTTATAATGGAGCCTTTCATTGGTATGCAATTAAT  
GATAGATTTGATCATGTAATTTCTTAGCTTTGATATAAGTACTGAGATCTTTCACAGCATAAAGATGCCAGCTACTGGTA  
AATCCTCTGGCGGAAAGAAGTATTGCCCTCATAGTCTTGAACGAGTCTCTAACGTTGATTTGTTATCCCAATCCCGATTG  
CGAGATGGATCCGACGAAAGATTCAATGGACATTTGGATAATGATGGAGTATGGTGCATACGAGTCTTGGACTAAGAAA  
TACATAATTAACCTCTTCTATAGAATCCCATTAAACAATTTGGAGGGATCATTTATTGCTTCTTCAAAGCAAAAAGAG  
GACTCCTCGTTTTCTACGATCTCAGTTCAAATGAAGTAAAGGAATTCGACTTGCATGGCCATCCTAAAAGTTTGAGAGT  
TCTAGTTTACAAGGAAAGTCTGATTTCCCTTACCAAAAAGGGGATGCGAGCATGGTACAAAATTTAAAAATTTGT

>P\_axillaris\_S19\_SLF8\_AB933044

ATGATGTTGGATGGAATTATGAAACATTTGCCTGAAGATATAGCAATGTATATACTTTTAAAGGTTTCCAGTGAAAATCTC  
TTTTACGATTTAAATTCATTTCCAAAAGTTGGTCCACTCTCATAGAATCCTCAACATTTATCAATATTCATCTCAATCG  
TGCTACAACAACCAAAAATAAATTCCTTCTTTTTAGCCGCTCCTACAGAGAGGAAACAGAAGGATTTAAAAATGTCTTG  
TCTATTCTTTCTAGTGGCAACAACGACGATCTTATCCCGTTGTTTCAGATCTGGAATTGCCATATCTAACCTTCACTG  
AATACTATCTTTTCAATAAACTCGTTGGCCCTTGTAATGGTTTGTATTGTTTTAACAGATTTTGAGATCATTGTCTTATT  
TAATCCAGCTACTAAAATACATGCTAATCCCGCCTAGCCCTTTTGTGTTGTCCAAAGGGTTTTTCATCGCTCCTTTAGA  
GGGGGTGTTGGGTTTTGGTTTTGACTCGATTGTGAAGGACTACAAGTTTGTCCAGATTTCAAAGTTTTTATGGATTCTG  
AATGGGTACCTGATGAGAAAGAGCAAAAAGTAGAGGTTTATGACTTGCCTTTGATTCTTGGAGAGATTTGAATCATGT  
GGATCAACAGTTGCCCTACTGTGTATTATTATCCATGTTTTGAGATGCTTTATAATGGAGCCTTTCATTGGTATGCAATT  
AATGATAGATTGGATCATGTAATTTCTTAGCTTTGATATAAGTACTGAGATCTTTC AAGCATAAAGATGCCAGCTACTG  
GTAAATCCTCTGGTGGGAAGAAGTATGGCCTCATAGTCTTGAACGAGTCTCTAACGTTGATTTGTTATCCCAATCCAGA  
TTGCGAGATGGATCCATCTAAAAGATTCAATGGACATTTGGATAATGATGGAGTATGGTATATACGAGTCTGGACTAAG  
AAGTACATAATTAACCTCTTCTATAGAATCGCCATTAACAATTTGGAGGGATCATTTATTGCTTCTTCAAAGCAAAA

GTGGACTTCTTGTTTCCTACGATCTTAGTTCCAATGAAGTAAAGGAATTCGACTTGCATGGTTATCCTAAAAGTTTGAG  
AGTTCTAGTTTACAAGGAAAGCCTTATTTCCATTCCAAAAAGGGGATGCAAGCATGGTACAAAATTTAAAAATGTCTGA  
AAAGGTATAACTATTTTCATAT

>P\_axillaris\_S19\_SLF8\_AB933043

ATGACGTTGGATGGAATTATGAAACATTTGCCTGAAGATATAGCAATGCATATACTTTTAAGGTTTCCAGTGAAATCTC  
TTTTACGATTTAAATTCATTTCCAAAAGTTGGTCCACTCTCATAGAATCCTCAACATTTATCAATATTCATCTCAATCG  
TGCTACAACAACCACAAATGAATTCATTCCTTTTCAGCCGCTCCTACAGAGAGGAAACAGAAGGATTTAAAAATGTCTTG  
TCTATTCTTTCTAGTGGCAACAACGACGATCTTATCCCCGTTGTTTCAGATCTGGAACCTGCCATATCTAACCTTTACTG  
AATACTATCTTTTCAATAAACTCGTTGGCCCTTGTAATGGTTTGATTGTTTTAACAGATTTTGAAATATTGTCTTATT  
TAATCCAGCTACTAAAAATTACATGCTAATCCCGCTAGCCCTTTTGTGTTGTCCAAAGGGTTTTCCACCGCTCCTTTAGA  
GGGGGTGTTGGGTTTGGCTTTGACTCGATAGTGAAGGACTACAAGTTTGTCCAGATTTCAGAAGTTTTTAAGGATTCTG  
AATGGGTACCTGATGAGAAAGAGCAAAAAGTAGAGGTTTATGATTTGCGTTTTGATTCTTGAGAGATTTGAATCATGT  
GGATCAACAGTTGCCTACTGTGTATTATTATCCATGTTTTGAGATGCTTTATAATGGAGCCTTTCATTGGTATGCAATT  
AATGATAGATTGGATCATGTAATTCCTAGCTTTGATATAAGTACTGAGATATTTTACAGCATAAAGATGCCAGCTACTG  
GTAAATCCTCTGGTGGGAAGAAGTATGGCCTTATAGTCTTGAACGAGTCTCTAACGTTGATTTGTTATCCCAATCCAGA  
TTGCGAGATGGATCCGTCTAAAGATTCATGGACATTTGGATAATGATGGAGTATGGTGTATACGAGTCTTGGACTAAG  
AAGTACATAATTAACCTCTTCTTATAGAATCCCCATTAACAATTTGGAGGGATCATTTATTGCTTCTTCAAAGCAAAA  
GTGGACTTCTTGTTTCGTGCGATCTTAGTTCCAACGAAGTAAAGGAATTCGACTTGCATGGTTATCCTAAAAGTTTGAG  
AGTTCTAGTTTACAAGGAAAGCTTGATTTCCATTCCAAAAAGGGGATGCAAGCATGGCACAAAATTTAAAACTTGT

>N\_alata\_DD6\_EF420256

ATGATGTTGGATGGAATTATGAAAAAATTACCTGAAGATGTTGTGATTTATATACTTTTCGAGGTTTTTCAGTGAAATCTC  
TTTTACGATTTAAATTCATCTCCAAGAGTTGGTACACTCTTATACAATCATCAACATTTATCAATGTTTCATCTCAACCG  
CAGTACCATAACAAAAACGAATTCATTCCTTTTCAGCCGTTCCCTTCAGAATAGAGACCGAAGGATTTAAAAATGTTTTA  
TCTATTATTTCTAGTGACGATTACAATGATCTTAATGTGCTTTTACAAGATCTAGATCTGCCATATCTAACATTCACTC  
CTAACTATCATTTTAAATGAACTCGTTGGCCCTTGTAATGGTTTGATCGTCTTAACGGATGATGATGATATTATCGTCTT  
ATTTAATCCAGCTACTAAAAATTACATGCTACTCCCACCTAGCCCTTTTGTGTTGTTCAAAGGGTTATCATCGCTCCTTT  
ATAGGTGGCGTTGGGTTTGGTTTTGATTCATTTGGGAATGACTACAAGTTTGTCCAGGATTTTCAGAAGTTTTTCTCGATA  
CTTATTGGGGCCCCGAGGAGAGGGAGCAAAAAGTAGAGGTTTATGATTTGCGTAGTGATTCCTGGAGAGATTTGAATCA  
TGTGGATCAACAATTGCCTACTATCTTTTGGAAATCAATGTTTCGAGATGCTTCATAATGGAGCCTTTCATTGGTATGCA  
GTTGGAGACTTAACGTATGAAATCCTTTGCTTTGACTTTAGCACTGAGATTTTTTCAAGCATGAAGATGCCAGAGAGTT  
GTAATGCCATGATGGGAAGCGTTATAGCCTTGCAAGTGTGAATGAGTCTCTAACATTAATTTGTTATCCCAGCCCAGA  
CAGTGAGATTGATCAGACTCAAAAATACCATGGATATCTGGATAATGATGGAGTACGGAGTAAATGAGTCTTGGACTAAA  
AAATACATAATCAGTCTCTTCTTATTGAATCCCCATTAACCATTTGGAGGGACCATTTATTGCTTCTTCAAAGCAAAA  
CTGGACAGTTAATATCCTACAATCTTCGTTCCAATGAAGTCAAGGAATTCGATTTACGTGGTTATCCTGAAAGCTTGAG  
AGCTATAGTTTACAAGGAAAGTTGATTTTCAGTTCCAAAAACGAAGACGCGAGCA

>P\_hybrida\_s7\_FBX1\_AB932986

ATGGCGGATGGAATTATGAAAAGACATCCCGAAGACGTAATAATATATACTATGTAAGTTTAGAGTGAAATCCCTTC  
TACGATTCAAAGGCGTTTCCAGGACATGGTACTCTCTCGTACAATCCTCAACATTCATCAATCTTCATCTGAATCGAAC  
TACAACCACAGAGATGAATTCATTTATTTTCAGCCGCTCCGTCAGAAAAGAACCAACGGATTTAGAAATGTCTGTCT  
ATACTTTCAAGTGACAATGACGATGATCTTAACCCTGTTTTTCCGGATCTAGACCCACCATATCTAACCTTCACTGAGT  
ACTATGTTTATAATAAACTCGTCGGTCTTGCAATGGTTTGATTGCTTTGACAGATTTTGAAGTTATTGTCTTATTTAA  
TCCAGCGACTAGAAATTATATGCTACTCCCACCTAGCCCTGCTTGCCAAAGGGTTTTTCGTCGCAACTTTCGAGGTGGC  
GTTGGGTTTGGTTTTGATTCGATTAGGAACGATTACAAGTTTGTTAGAATTTTCAGAACTCTGCATGGATTTCAGATTGGA  
TTCCCGTTGAAGAACAAAAGTTGAGGTTTATGATTTGAGCATTGATTCTTGGAGAGAATTGGATCATGTAGATCGACA  
GACACAATGGTAATTCCTTTGTTTTGACATGAGCACTGAGATTTTTTCGCAACGTGATGATGCCTGATTCCTTGTAAATGGCT  
ATGATGGGAAGTGTTATAGCCTTAAAATACTGAATAGGTCTCTAACATTTGATTTGTTACCCGGATCCATTTAGCGATAG  
TGATCCTACACAAGATTCAATGGTCACTGAGATAATGATGGAATACGGTGCATACGAGTCTTGGACTAAGGAATACACA  
ATCAGACCTCTTCTTATTGAATATCCATTAACAATTTTGGAGGATCATTTATTTTTTCTTGAAAGCAAAAAGTGGACATC  
TTGTTTGTCTATAATCTTACTACCGATGAAGTAAAAGAATTCAATTTACATGGTTATCCTGAAAGTTTAAAGAGTTATGGT  
TTATAAGGAAAGCTTAACCTCAATTCGAAAAGAGTACAA

>P\_hybrida\_S9\_FBX1\_AB933000

ATGGTCAATGGAGTTATGGAGAAATTTGCCGAAGATGTGTTTATTTATACACTTCTAAGGCTTCCGGTGAAATCACTCA  
TGCGATTCAAATGTGTCTCTAAAGTAGGGTACACCCTAATACAGTCATCCGCTTTCATAAAGTTTTCATCTCAACCGCAC  
CACAACCACAGAGGAAGAACTCATTTTGAAGCGCTCCATTGAAGAAGAATCTACCCGATATAAAACTATCTTGTCT  
TTTTCTTCTAACGATGATGATAATCTTAACCCACTTTTTCTGATTTGGATGTGCCATGCCTGGTATCTACTTGTAGTA  
GTAATTTTGTATCAACTGTTTGGTCCATGTCAGGGTTTGGATTGATTAATAGATTACGTTAACACTTTCTTATTAAATCC  
AGCTACTAGAAATTATAGGATAATCCCGCCAGCCCTTTGAGTAGTCAAGAAAGGGTGCATCTCTACGTTTCAGGGTGCA



GGATTCGGGTTTACTCGATTGCGAAAGAGTATAAAAATTGTCATGATTGAAGTGATTACAGGGACACTCCTTGCAAGG  
ATCCTGAAGTAGGAGAGAAGAAAAGTTGAGGTTTATGATTTTAGCATTGATTCTTGGAGAGAAGTTGATCATGTAAGTAA  
TGACCTGCCACGATGTTCTGGGTGCCTTGTCTGAGATGTTTTACAAGGGAGCCTGCCATTGGTTTTGCACTTCCGAA  
CCAGACACTGTGGATATTCTTTGTTTTGACTTGAGCAGTGAAGTTTTTCGGATCATGAAAATGCCTGATAGCTGTCGAT  
TCTTCAATGGACCTAGTTATGGCCTCCTAATCAAGAATGAATCTCTAACCTTAATTTGTTATCCCGACGAAGAGTCTGA  
GGTTTATCCAAGACAGGAGTCGATAGATATTTGGATAATGAAGGAATACGGTGCATATGACTCTTGGATTAAAAAACAA  
ACTATTAGACCTCTGCCTATTGAAATACCATTATCAATTTGGAAGGATGATTTATTGCTTTTTTCAAAGCAAAAATGGAT  
TTCTGCTTTCATATGATCTTAATTCGGGTGAAGTTAAACAATACAATTTACATGGTTGTCCGAAGAGTTTTGAGAGCTGT  
AGTTTACAAAGAATGCCTGACCCAAATTCAAAGAGGAGGCGAGCATAGCACTGAAGTTCAAAAATTT

>P\_hybrida\_Sm\_SLF2\_AB933091

ATGATTAAACTGCCTGAAGATGTGGTGATTTATATACTTTTAAGATTGACAGCGAAAATCTCTCTTGCATTTAAATGTA  
TTTCTAAGTATTGGTACACTCTTATCTTATCAAACACTTTTGTCAAACCTTCATCTCAACCGCATCACAACCATAAAAAGA  
TGAATTCATCTTTTTGATTGCGACGTTTCCAGAGAAGAACCAGATCAATTGAAAAGTATTGCATCTTTTTTTTTCTGGTGAT  
GATAATAATAATCTTAGCACTCTTTTTCCAGATTTAGATGTGTCAGATCTTACCTCCTCTTCTTGTACTGTTATTAATC  
AAATCATCGGTCCTTGCCACGGTTTAAATTGCTTTGACAGATTCTTTTTATCATAATCATACTTAACCCAGCTACTAGAAA  
ATATGTTGTGCTTCCACCTAGCCCTTTTGGATGTCCAAAAGGTTACCATCGTTCCATTGAAGGTATTGGTTTTGGATAT  
GATTC AATTGTGAACGAATACAAGGTTGTCAGGCTTTT CAGAAGTTTATTGGGATCCTCCTACCGATTATTTTTGGTCCTA  
GAGAACCCAAAGTTGATATTTTTGATTTGAGCATTGATTCTTGGCGAGAAGTTGATGTAGAATTTCCCTCGATATATTA  
TCTGCTTGTCTGAGATGATTACAAGGAAGCAGTTTATTGGTTTATTATTACAGACACAGTAGTCATTCTTTGTTTT  
GATATCGGCACTGAGATTTTCCGCACAATGGATATGCCTGGAACCTGTACTTTTTCTCGGCGGGCCACGTTATGGACTTG  
CTGTTTTATATGAGTGCCTAACATTGATTTGTTACCCTGATCCAATGAGTTCAATTGACCCAACAAAAGATCTAATTGA  
CATTTGGATGATGGAGGAGTATGGAACAAGCGAGTCTTGGATTAAGATATACACAATTAACCTGTTTCTTATTCCTATC  
GAATCCCACCTAGCCATTTGGAAGGATCATTGTTGCTTCTT CAGACAAAAGTGGATATTTAATTTCTTATGATCTTA  
ATTCCGATGAAGTGAAGGAATTC AATTTGAATGGCCATCTTGAAAGTTT GAGAGTTATAGTTTACACAGAAAAGCATAAC  
TGTGATTTCAAGAATAAGCGAACATGGTACACAAGTTCTGCAATTT

>N\_alata\_DD4\_EF420254

ATGGTGGGTGGAATTATAAAGGCAGTTCCCGAAGATGTTGTTATTTATGTAAGGCTTCCCGTAAAATCTATCA  
TGCGATTC AATGCACCTCGAAAAC TTTATACATTCTCATAACGATCCACCTCTTTCAGCGATATTCACCTTAATCACAC  
CACAACCTCACAAGATGAATCAATCTCTTCAAGCGTTCCCTCAAAGAAGAAGCCAACCAATTTAAAATGTCATATCT  
TTTCTTTTTGGTGTGATGATGCCGGTTTTGATCCTCTTCTTCCAGATCTAGAGGTGCCACATCTGACCACTGATTATG  
GCAGTATTTTTCATCAACTCATAGGTCCTTGCCATGGTTT GATTGCTTTGACGGATTTCGGTTCAAACCGTGTGCTTAA  
TCCAGCTACGAGACATTACCGCTACTGCCGCCTTGCCCTTTTGGTTGTCCAAAAGGTTACCATCGTACCATTGAAGGT  
GTTGGGTTTGGTTTCACTCAATCTGAATGACTTCAAGGTTGTAAGAATTT CAGATGTTTTCTGGGATCCGCTTACG  
GATATCCCGAAGGCCGAGATAGCAAAGTTGATATTTATGAGCTAAGCACCATTGATGGAGGGAAGTCCGAACCTGTACA  
GGTGCCTAGGGTATATTGGTTGCCTGTTCTGAGATGGTTTACCAGGAAGCAGTTTATTGGTTTGAACCTATAGAAGAA  
GTGGTCACTCTTTGTTTTGACATAGTAACAGAGACTTTTCGCAATATGAAAATGCCAGATGCGTGTATTCTATTAAGC  
AGTCACGTTATGGCCTTATTGTCTTAAATGAGTCTCTAGCGTTGATTTGCTACCCCGATCCACGGTGTGCAGTTGACCC  
AACGCAAGATTTTATTACATTTGGTTGATGGAGGAGTACGGTGTAAAGCGAGACTTGGATTAAGAAATACACAATTC A  
TCTCTCCCAATGAATCCCCATTAGCTGTTTGGAAAGGATCATTATTTGCTACTTCAAAGCAAAATTTGGGCAACTTATAT  
CCTATGATGTTAACTCCGATGAAATGAAGGAATTCGATTTACATGGCTTTCCCAAAAAGTTT GAGAGTTATAGTTTCAA  
GGAAAGCTTAACTTCGATTC AAGTGGAAAGCGAGCATGGTACACGAGTGCAAAAAGTTT

>P\_axillaris\_S19\_SLF1\_AB933040

ATGGCGAATGGTATTTTAAAGAAATGCCCCGAAGATTTGGTGTCTTATACTATTAACATTTCCAGTGAAATCTCTTC  
TGCGATTC AATGTATCTCTAAAGCTTGGTCCATTCTCATAACAATCCACCCTTTCATAAACCGTCATATCAATCGCAA  
AACAAACACAAAAGCTGAATTCATCTCTTAAAGCGTTCCATCAAAGATGAAGAAGAAGAATTTATAAATATCTTGTCT  
TTTTTTCTGGTCATGATGATGTTCTTAACCTCTTTTCCAGATATAGATGTCTCATAACATGACGTCAAATGCGATT  
GCACTTTACTCCACTCATCGGTCCTTGTGATGGTTT GATTGCTTTGACAGATAACCATAATCACCATAACTTAATCC  
GGCTACCAGAAAACCTCAGACTGCTCCCACCTAGCCCTTTTGGTTGTCCAAAAGGTTACCATCGTTCTGTTGAAGGGTC  
GGATTTGGCTTTGACACCATTCAAATTAATAAGGTTGTTAGGATTTCTGAAGTTTATTGTGAAGAAGCTGATGGTT  
ATCCTGGTCTTAAAGATAGTAAAATGATGTTTGTGATTTGAGTACTGATTCTTGGAGAGAATTTGGACCATGTACAGTT  
GCCATCGATTTATTGGGTGCCTTGTGCTGGAATGCTTTACAAGGAATGGTTCACTGGTTTGAACCTACGGACACGTCG  
ATGGTTATTTCTTTGTTTTGACATGAGTACTGAGATGTTT CATGATATGAAAATGCCTGATACTTGTGTAGGATTACAC  
ACGAGCTGTATTATGGCCTTGTAGTCTTATGTGAGTCTTTACATTTGATTGGTTACTCCAACCAATAAGTTCTATTGA  
TCCAGTAGAAGATAAAAATGCACATTTGGGTGATGATGGAGTACGGTGTAAAGCGAGTCTTGGATTATGAAATACAGATT  
AAACCTCTTTCTATTGAATCCCCTTTAGCTGTTTGGAAAGAATCATATATTGCTTCTTCAAAGTAGAAGTGGACTTCTAA  
TTTTCTATGATCTTAATTCGGGTGAAGCAAAGGAATTTGAACTTACATGGTTTTCCAGACACTTTGAGTGTAAAGTTTA  
CAAAGAATGCTTAACTTCAATTC AAAAGGGAGCGAGTACAGTACAAAAGTACAAAATTTT

>P\_axillaris\_S19\_SLF\_AY766154

ATGGCGAATGGTATTTTTAAAGAAATTGCCCGAAGATTTGGTGTTCCTTATACTATTAACATTTCCAGTGAAATCTCTTC  
TGCGATTCAAATGTATCTCTAAAGCTTGGTCCATTCTCATAACAATCCACCACCTTTATAAACCAGGCATATCAATCGCAA  
AACAAACACAAAAGCTGAATTCATTCTCTTTAAGCGTTCCATCAAAGATGAAGAAGAAGAATTTATAAATATCTTGTCT  
TTTTTTCTGGTAATGATGATGTTCTTAACCCTCTTTTTCCAGATATAGATGTGTGCATACATGACGTCCAAATGCGATT  
GCACTTTTACTCCACTCATCGGTCTTGTGATGGTTTGATTGCTTTGACAGATACCATAATCACCATAGTACTTAATCC  
GGCTACCAGAACTTCAGAGTGCTCCACCTAGCCCTTTTGGTGTGCCAAAAGGTTACCATCGTTCCGTTGAAGGGGTC  
GGATTTGGCTTTGACACCATTTCATATTACTATAAGGTTGTTAGGATTTCTGAAGTTTATTGTGAAGAAGCTGATGGTT  
ATCCTGGTCCATAAAGATAGTAAAAATTGATGTTTGTGATTTGAGTACTGATTCTTGAGAGAGAATTGGACCATGTACAGTT  
GCCATCGATTTATTGGGTGCCCTTGTGCAGGAATGCTTTACAAGGAAATGGTTCACTGGTTTGCAACTACAGATACGTCG  
ATGGTTATTCTTTGTTTTGACATGAGTACTGAGATGTTTCATGATATGAAAATGCCTGATACTTGTAGTAGGATTACAC  
ACGAGCTGTATTATGGCCTTGTAATCTTATGTGAGTCTTTCACATTGATTGGTTACTCCAACCAATAAGTTCTATTGA  
TCCAGTAGAAGATAAAATGCACATTTGGGTGATGATGGAGTACGGTGAAGCGAGTCTGGATTATGAAATACACTATT  
AGACCTCTTCTATTGAATCCCTTTAGCTGTTTGAAGAATCATATATTGCTTCTTCAAAGTAGAAGTGGGCTTCTAA  
TTTTCTATGATCTTAATTCCGGTGAAGCAAAGGATTTGAACTTACATGGTTTTCCAGACAGTTTAAAGTGTAAAGTTTAA  
CAAGGAATGCTTAACTTCAATTCAAAAGGGAGCGAGTACAGTACAAAAGTACAAAAATTT

>Nalata\_DD1\_EF420251

ATGGTGGGTGGAATTATAAAGGCAATTCCCGAAGATGTTGTTATTTATGTACTCATAAGGCTTCCCGTAAAAATCTATCA  
TGCGATTCAAATGCACCTCGAAAACCTTATAACATTCTCATAACGATCCACCTCTTTCAGCAATATTCACCTTAATCACAC  
CACAACTTACAAGATGAATTAATTCCTTCAAGCGTTCCCTCAAAGAAGAAGCCAACCAATTTAAAAATGTCATATCT  
TTTCTTTTTGGTGTGATGATGTCGGTTTTGATCCTTTTCTTCCAGATCTAGAGGTGCCACATCTGACCACTGATTATG  
GCAGTATTTTTCATCAACTCATAGGTCCTTGCCATGGTTTGATTGCTTTGACAGATACCATAACCACAATCTTAATTA  
TCCGGCTACTAGAAATTTAGATTGCTCCACCTAGCCCTTTTGGTGTGCCAATGGTTACCATCGTTCTGTTGAAGCG  
CTTGGGTTTGGCTTCGACTCGATTGCGAATGACTATAAAAAATTGTTAGGCTTTCTGAAAGTGTTTGGGATCCTCTTTATG  
ATTATCCTGGTCTAGAGAGAGTAAAGTTGATATATATGATTTGAGCATTGATTCTTGGAGAGAACTGGATAGTGAACA  
GTTGCCATTGATTTATTGGGTGCCCTTGTGCTGAGACATTTTACAAGGAAGCGTTTTCATTTGGTTTGAAGTATAGATTTG  
TCTATGGTGTATTCTTTGTTTTGACGTGAGCACTGAGATTTTTCGTAATATGAAAATGCCCTCGTACTTTTATTTTTGACA  
ACGCGCAATATCCTGGCCTTGTAATCTTAAGCGAGTCTCTTACATTAATATGTTATCCGAACCAATATCTATTGATCA  
TATACAAGAAGTAACGCGCATTTGGGTGATGAAGGAGTACGGAGTAAGCGAGTCTTGGATTTTGAAGACACAATTAGG  
CTTCTCTTATTGAATATCCGTTAGATATTTGGAAGAATAATTTATTGCTGTTTCAAAGCAAAGCGGACTTTTGATTT  
CCTATAATCTTAAATCCGATGAAGTAAAGGAACTCAAATTAATGGTTTTCTGGAAGTATGAGTGTAAAGTTTACAA  
GGAGTCTTAACTCAATCCCAAGAGGGTTAAAAATTA

>N\_alata\_DD3EF420253

ATGGTAAATGGAAGTATAAAGAAATTGCCCGAAGACTTGGTATTTTGTATGCTATTAAGATGTCCGGTGAAATCTCTCA  
TGCGATTCAAATGCATATCTAAAGTTTGGTACCATTTCATAACAATCCACCACCTTTATAAATCTTCATCTCAACCGCAC  
AACAAAGCGTAGAAAACGAATTCATTCTCTTCAAGCACTCCATCAAAGAAGATACAGGAGAATTTAAAAATGTCTTGTCT  
TTTTCTTCTGGTCATGATAATGGTGCTCTTAACCCTCTTTTTCCAGATATAGACGTGTCATACATGGCCTCCAATTTGTA  
GTTGTACTTTTTTCCCACTCATCGGTCTTGTAAATGGTTTGATTGCTTTGACAGATACCATAACCACAATCTTAATTA  
TCCGGCTACTAGAAATTTAGATTGCTCCACCTAGTCCCTTTTGGTGTGCCAATGGTTACCATCGTTCTGTTGAAGCG  
CTTGGGTTTGGCTTCGACTCGATTGCGAATAACTATAAGGTTGTTAGGATTTCTGAAATTTTTTGAAGCCTGTTTACG  
ATTATCCTGGTCTAGAGAGAGCAAAGTCGATGTTTATGATTTGAGCATTGATTCTTGGAGAGAACTGGACCATGTACA  
GGTGCCACTGATTTATTGGTTGCCCTTGTCTGAGACATTTGACAATGAAGTGGTTTCAATGGTTTGCATCTACAGACTTG  
TCGCTAGTTATTCTTTGTTTTGACATGTGCACTGAGATCTTTCGTAATATTAATAATGCCCTGATACTTTTATTTTTGACA  
ACGCGGAATTTTATGGCCTGGTAATCCTAAGCGAATCTCTAACATTTGATTTGTTACCCGAACCAATATCTATTAATCC  
AATCCAGGAAGTACCACATTTGGGTGATGAAGGAGTATGGTGAAGCGAATCTTGGTTTTTGAAGACACAATTAGA  
CCTCCTCTATTGAACGCCCGTTAGATGTTTGAAGAATAATAATACTTTTTTGAAGCAAAGCGGACTTTTGGTCT  
CCTATAAGCTTAATCCAATGAAGTAGAGGAACTCAAATTACATGGTTGTCTGGAAGTTTGGAGTGTAAAGTTTACAA  
GGAATCCTTAACTTCAATCCCGAGTGGGAGCGAGCAGTACGAAAGTACAATTTTTT

>P\_axillaris\_S19\_SLF13\_AB933049

ATGATGGATGGAACCTATGAAGAAATGCCAGAAAGATATGCGGATTTATATATTACTCCGGCTTCCGTGTAATCTCTTA  
CGCGATTTAAATGTGTTACTAAAAGTTGGCATACTCTCATAACAATCATTCAATTTTCATCAATTTTCAATTTCAACCAAAA  
ATCTACCACCAAAGATGAATTCATTCTCTTCAAGCGATCCATCAAACATCCGGACGGATTTAGCCATGTTTTGTCTTTT  
CTCGTCGATCATGAGGGTAAAGATGATCTAGATCCTATATGTCCTGATATAGATATGCCATATCTGACCACAGGTTTTG  
CTAGTAGTACCTCTCATCAATTCAGTGGTCTACCAATGGTTTGATTCTTTTTGACAGACTCGTTAAACTTTCTATTATT  
AAATCCAGCTACTAGAAGTTATAGGCTGCTCCACCCAATCTTTTTTGTGTCCTCGTGGTTTCCCTCGTCTTATTAC  
GGTGTGGATTTGGCTATGACTCTATTCAAAGACTTACAAGGTAATTAGAGTTTACAGTGTGTATGGGGATCCTCCAT  
ACAATGATCGTAGTGAATGTGCGTGGGAAAGTGAGGTTTATGATTCGAGCACTGATTCTTGGAGACAAGTACTAGCTAATGT  
TGATCAAGAGTTGCCCTGGGCTTATATGCACCCTTACTCTGAGTTGTTTTACAAGGAACTTTTCAATGGTATGCCCAA  
GGACACATGCGTTTTACTTCTCTGTTTTGATATCAACACTGAAATTTTTTACACAATGCAAGTGCCCAAACTTTGTGCTT

CGAGAGATGAGAAGTGTTCATAGCTTAGTAGTCTTTGATGAGTGTCTAACATTTATTTGTTACCCTGACCCAAGGAGAGA  
AAGTAGTCCAGTTC AAGAAACGATTGAGATTTGGATAATGCAGGAGTACAGCATAAGCGAGTCTTGGATTAAGAAATAC  
ACAATTAGACCTCCTCCTATTGAATCCCCTTTGGCAATATGGAAGGATCGCTTATTGCTGCTTCAAGACAAAAGTGGAG  
TCCTGATTGCCTATGATCTTAATTCGGATGAAGTCAAGGAATTC AATTACATGGTCATCCTGAAAGTTTAAGAGTAAT  
AGTTTACAAGGAAAGTTTGACTCCAATTCCTATAGGTAGTACACAAGTTGAACGATTT

>P\_axillaris\_S19\_SLF3\_AB568404

ATGACGGCCATGAAGAAATTGCCCATAGATGTGGTGATTAATATGTTATTTAGGCTTCCCGTGAAATCTCTCGCGGAT  
TCAAGTGTGTTACTAAAAGTTGGTACTCCCTCATACAATCAGCCGATTTTCATCAATCGTCATCTCAACCGGCCACTAC  
CATCACAGATGAATTTATTCTCTTCAAGCGATCGTTCAAAGAACAGGAAGGATTTAGAAATGTAATGTCTTTCTGGTC  
GGTGGTGTAGGTGAAGACAATCTTGATCCTATTTCTCCTGATGTAGATGTACCATATCTGTCCACCAGTTATAGTTGTA  
TCTGTCATCAACTCACTGGTCTTGCCATGGTTTTGATTCTTTTGACAGACTCCACAAACCTTGTCTTATTAATCCAGC  
TACTAGAAATTATAGGCTGCTCCACCTAGCCCTTTTGGTATACAACGTGGGTTTTATCGTTCTGTTGCCGGTGTAGGA  
TTTGGCTATGACTCGGTTTCGAAGACGTATAAGGTGGTCAGAATTT CAGAAGTTTACGGAGAACCTCCATTCAATTGTC  
CTAGTGTGATGGAGTGGAAAGGTGAGGTTTTATAATTCAGCACTGATTCTTGAGAGAACTAGATTGTGTGGATCAAGA  
ATTGCCCTGGCCTTACAACCTTCGCTTACTCTGAGATTTTTTATGAAGGAGCCTTTTCATTGGTATGCCACAAAAATGTG  
GTTTTAATTCCTTGTGTTTTGATGTCAACACTGAAACTTTTTCGCACAATGGAAGTGCCTGAACCTTGTGCTTCGTATGACG  
AAAAGTGTTCATAGCCTCCTAGTTTTAGATGAGTTTTCTAACACTTTTTTTGTTACCCTGATCCAAGGAGAGAAAAGTAGTCC  
AATACAAGAAACAATTGATATTTGGACAATGCAAGAATACAGGGTAAACGAGTCTTGGATTAAGAAACACACAATTA  
TCTCCTCCTATTGAATCGCCATTGGCAATTTGGAAGGATCGCTTATTGCTTTTTCAAGACAAAAGTGGAAATCTGATAT  
CTTATGATCTTAATTCGGATGAAGTCAAGGAATTC AATTAGATGGTTATCCTGCAACTTTGAGAGTTATAATTTACAA  
GGAAAGCTTAACTCCAATTCCTAAGGGTAGTACACAAGTTCAAAATTTT

>P\_hybrida\_S11\_SLF3\_AB933014

ATGAAGAAATTGCCTGAAGATGTGGTGATTTATATACTTTTTAGGCTTCCCGTGAAATCTCTTACACGATTCAAACGCG  
TTACAAAACGTTGGTACTCTCTCATACGATCATCTAGTTTTATAAATCTTCATCTCACCGGTGCCACTAATACCATCAA  
AGATGAATTAATCTCTTCAAGCGATCGTTCAAAAAACGGGAGGGATTTAAAAATGTGTTGTCTTTTCTGCTCGGTAGT  
AATGCTGAAGATGATCTTGATCCTATTTCTTCTGGTCAAGATGTGCCATATCTGTCCACCCGTTATAGTAGCATCTCTC  
ATCAACTCACTGGTCTTTGCCATGGTTTGATTGTTTTGACAGACTCCACAAATTTTGTCTTATTAATCCAGCTACTAG  
AAATTACAGGCTGCTCCACCCAGTCCCTTTGTATGCCACGTGGTTTATATCGTTCTATTGGCGGTGTTGGATTTGGC  
TATGACTTCATT CAGAAGAACTACAAGGTGGTTAGAATTT CAGAAGTGTACGGAGAACCCTCCATTTAATTGTCCAAGTG  
TGATGGAGTGGAAAGGTGAGGTTTATGATTCGAGCACTGATTCTTGAGAGAACTAGCTTATGTGGATCAAGAGTTGCC  
CTGGCCTTATAATTTCCCTTATTCTGAGATGTTTTACAATGGAGCCTTCCATTGGAATGCCCATAGAAATATGGTGGTA  
ATACTTTGTTTTGACATCAGCACTGAAATATTTTCGCAGTATGCAAGTTCTTGAATCTTGTGCGTCATATGACGAAAAGC  
GCCATAGCCTTTTAATCTTGGATGACTCTCTAACAATTAATTTGTTACCCTGACCCAAGAAGGGTGAAGTAGTCCGGTACA  
AGATACAATTGATATTTGGACAATGAATGAGTACAATGTAACGACTCTTGGATTAAGAAATACACCATTAGATCTCCT  
CCCATTGAATCCCCATTGGCAGTTTGGAAAGGATTGCCGATTGCTTCTTCAAAATAAATGTGGATTTCTGATCTCCTATG  
ATTTTTATTCCAATGAAGTGAAGGAATTTAATTACATGGTTATCCCGGAAGTTTGAGAGTTATAGTTTACAAGGAATG  
TATGACTCCGATTCCTAGAGGTAGTACACGAGTTCAAAAATTA

>N\_alata\_DD2\_EF420252

ATGGTGGATGGAATCATGAAAGAATTGCCCGAAGATCTGGTGATATATGTAATTTCTAATGCTTCCAGTGAAATCTCTAT  
TGCGATTGAAAAGCTCCTGTATAACTTTTTGCAATATCATAAAGTCATCCACCTTCATTAATCTTCATCTCAATCGTAC  
AACCAACGGCAAGGATGAATTGATTCTCTTCAAGCGTTCCTTCAAACAAGAAGAACCCAACCTTCATAAAAATGTCTTG  
TCTTTCTTCTCAGTGAAGATACTTTTAATCTTAAGCCTATTTCTCCAGATGTAGAGATTCCACATCTTACCAACACTA  
ATGCCAGTGTTTTTCATCAACTCATTGGCCCTTGCAATGGTTTGATTGCCTTGACAGATTCCTGACCCTATCTTGT  
TAATCCAACAAC TAGAATTTACAGACTAATCCACCTTGCCTTTTGGTACTCCACCGGGTTTCAGACGTTCCATTAGT  
GGTATTGGGTTTGGCTTTGACTCGATCGCAAATGATTACAAGTTTGTAGGATATCAGAGGTTTACAAGGACCCCTTGTG  
AGAAAGACATGAAAGTTGAGGTTTTTGACATGTGCACGTACTTGGAGAGAAGTGCATGGTCAACAACCTGCCTATGGC  
GTTTTGACGCTTGTTCAGAGATAATTTACAATTTGTGCCTTTTCAATTTGGTTTGGCCACTGCAGACGATGTAATTTCTC  
TGTTTTGACATGTGCGCCGAGAAAATTTACAATATGGAACCGCCTGGTACATGTCAATGGTTTACGGTAAAGTGTATG  
GACTTGTGATTTTTATATAAGTCTCTGACGTTGATTTGCTACCCTGATCCAATGTGCTGACTGATCCAACGGAAAGATTGAT  
GGATATATGGATAATGAAGGATACGGTAAAAGGAGTCTGGATAAAGAAATGCTCAATTGGACCTCTTCTCTATTGAA  
TCCCCATTAGCAGTTTGGAAAGATGATTTATTGCTTTTTCAAACAAAAGTGGATATTGATTGCCTATGATCTTAATT  
CTGATGAAGTGAAGGAATTC AATTACATGGTTTTTCCCACGAGTTTGAGAGTTATAGTTTACAAGGAAAGCTTGACCC  
GATTCCAAGAAATGGGGATGGAACCTGTAGTTCAACTATTT

>P\_axillaris\_S19\_FBX2\_AB933054

ATGTTGGATGGGACCATGAAGGAATTGCCCATGATGTAATGATTTATATTCTTGTATGCTCCCGGTAAAATCTCTAC  
TACGATTC AATGCAGCTGTA AAACTTTTTGCAATATCATAAATCAGCCACTTTTCATTAATCTTCATCTAAATCATA  
AACCAACTTCAAGGATGAATTGGTTCTCCTCAAGCGTTCCTTCAAACAGATGAATACAACTTTTATAAATCTATCTTA  
TCTTTTCTTTCTAGTAAAGAAGATTATGATTTTACGCTTATTTCTCCAGATGTAGAAATCCACATTTGACCACCCTT

CTGCCTGTGTTTTTTCATCAACTCATTGGTCCTTGCAATGGTTTGATTGCCTTGACAGATTCCTGACCACTATCTTGTT  
TAATCCAACAACCTCGATATTACAGATTAATCCACCTTGCCATTTGGTATTCCGCGTGGTTTTAGACGTTCCATTAGC  
GGTTTTGGCTTCGGTTTTGATTCAAATGCCAATGATTACAAGGTTGTTAGAATATCAGAAGTATACAAGTATCATTATG  
ATAAAGATATGAAAGTTGACATTTATGACGTTTTCCGTTGATTCTTGGAGAGAAGTGAATCTTTTAGGTCAAAAGTTGCC  
TATTGTGCTTTGGTTTTCTTGTCTGAGATATTGTACAAACGAAACGTTTCATTGGTTTGCCTGTCAGATGATGTAGTA  
ATTCTCTGTTTTGACTTCAGCACTGAACATTTAAAAATATTGAAATGCCTAATGCACATGATATCGATGGAATGTCTT  
ATGGCCTTGTGATTTTATATAAGTTTCTGACGTTGATTTGTTACCATTATCCAATGTTTACTGAGCCAACAGAAGATTT  
GGTGGATATTTGGATAATGAAAGAGTACGGTCAAAGGAGTCTTGGATAAAAAGATTCTCAGTTAATCTTCTTCTTATT  
GAATCCCCGTTGGCAGTTTTGGAAGGATGAATTATTGCTTCTTCAAACCAGAAGTGGACAATTGTTTACCTATGATCTTA  
ATTCTGATGAAGTCAAGGAGCTTAATTTACATGGTTGTCCAGAAAGTCTGAGAGTAGTAGTTTATAAGGAAAGCTTGAC  
CCTGATCCAAGAAATGACGGTGGTGTGAAGTTCAACCATTT

>P\_axillaris\_S19\_FBX1\_AB933053

ATGTTGGATGGGACCAGGAAGGAATTGCCCCGTGATGTAGTGATTTATATTCTTGTAAATGCTCCCGGTAAAAATCTCTAC  
TGCGATTTAAATGCAGCTGTAAAACTTTTCGTAATATCATAAAATCAGCCACTTTTCATTAGTCTTCATCTAAAATCATA  
AACCAACTTCAAGGATGAATTGGTTCTCCTCAAGCGTTCCCTCAAACAGATGAGTACAACTTTTATAAATCTATCTTA  
TCTTTTTCTTTTCAGTAAAGATGATTATGATTTTAAAGCCATTTCTCCAGATGTAGAAAATCCCACATTTGACCACCACTT  
CTGCCTGTGTTTTTTCATCGACTCATTGGTCCTTGCAATGGTTTGATTGCCTTGACAGATTCCTGACCACTATCTTGTT  
TAATCCAACAACCTCGATATTACAGATTAATCCACCTTGCCATTTGGTATTCCACGTTGGTTTTAGACGTTCCATTAGC  
GGTATTGGGTTTTGGCTTTGATTTCGGATGCAAATGATTACAAGGTTATTAGGCTATCAGAAGTTTACAAGGAACCTTGTG  
ACAAAGATATGAAAGTTGATATTTATGACTTTTTCCGTTGATTCTTGGAGAGAAGTTTTAGGTCAAGATGTGCCATTTGT  
ATTTTGGTTGCCATGTGCTGAGATATTATACAAAAGAAAACGTTTCATTGGTTTGCCTTGCAGACGATGTAGTAATCTT  
TGTTTTGACATGAGCACCGAAAAGTTTTAACAATATGAGTATGCCTGATCCATGTCAATTTTTATGATGGAAAAGTGTATG  
GCCTGGTGATTTTGTGTAAGTTCGCTGACGCTGATTTGTTACCCTGACCCAATGTCAAGTAATCCAACAGAATATTTGAC  
AGACATTTGGATAATGAAGAAAATACGGTAAAAGGAGTCTTGGAAAAGAGATGCTCAATTAGACTTCTTCTTATTGAA  
TCCCCACTAGCCGTTTGGAAAGGATGAGATATTGCTTCTTCCAGAGCAAATGGGACATTTGATTGCCTATGATCTTAATT  
CGAACAACTCCGGAATTAGATTTACATGGTTATCCCAGAGTTTTGAGAATTATAATTTACAGGGAAAGCTTGACCCG  
GATTCACAAGAAATAAGGATTGCATAGAACTTCAAATTTT

>P\_axillaris\_S17\_SLF9\_AB933029

ATGTTGGATGGGAGCATGAAGGAATTGCCCCAAGATGTAGTGATTTATATACTTGTAAATGCTCCCGGTAAAAATCTCTTC  
TACGATTCAAATGCAGCTGTAAAACTTTTGCAATATCATAAAATCATCCACTTTTCATTAATCTTCATCTGAATCATA  
GACCAACGTC AAGGATGAACCTGGTTCTCCTCAAGCGTTCCCTCAAACAGATGAATACAACTTTTATAAATCTATGTTA  
TCTTTTCTTTCCAGTAAAGAAGATTATGATTTTAAAGCTCATTTCTCCAGATGTAGAAAATCCCACATTTGACCACCACTT  
CTGCCTGTGTTTTTTCATCAACTCATTGGTCCTTGCAATGGTTTGATTGCCTTGACAGATTCCTGACCACTATCGTGTT  
TAATCCAGCAACGCGAAAAGTACAGACTAATCCACCGTGGCCATTTGGTATTCCGCGTGGTTTTAGACGTTCCATTAGC  
GGTATTGGGTTTTGGCTTTGATTTCGGATGCAAATGACTACAAGGTTGTTAGGCTATCAGAAGTTTACAAGGAACCTTGTG  
ACAAAGAAATGAAAGTTGATATTTATGACTTTTTCCGTTGATTCTTGGAGAGAAGTTTTAGGTCAAGAGGTGCCTATTGT  
GTATTGGTTGCCATGTGCTGAGATATTATACAGAAGAAAACTTTCATTGGTTTGCATTTGCAGACGATGTAGTAATCTT  
TGTTTTGACATGAACACCGAAAATTTTACAATATGGGAATGCCAGATGCATGTCAATTCGATGATGGAAAAGTGTATG  
CCCTGGTGATTTTATGTAAGTGCATGACGCTGATTTGTTACCCTGATCCAATGCCAAGTAGTCCAACAGAAAAATTGAC  
AGATATTTGGATAATGAAGGAATACGGTAAAAGGAGTCTTGGATAAAGAGATGCTCAATTAGACTTCTTCTTGAATCC  
CCATTAGCAGTTTGGAAAGGATGAGATATTGCTTCTTCAAAGCAAATGGGACACTTGGTTGCCATGATCATAAATCTG  
ATGAAGTGAAGGAATTAGATTTGCATGGTCTTCCGACGAGTCTGAGAGTTATAATTTACAGGGAAAGCTTGACCCTGAT  
TCCAAGAAGTAAGGATAGCATAGACCTTGAACAATTT

>P\_axillaris\_S17\_SLF9\_AB933030

ATGTTGGATGGGACCATGAAGGAATTGCCCCAAGATGTAGTGATTTATATACTTGTAAATGCTCCCGGTAAAAATCTCTAC  
TACGATTCAAATGCAGCTGTAAAACTTTTGCAATATCATAAAATCATCCACTTTTCATTAATCTTCATCTAAAATCATA  
GACCAACGTTAAGGATGAATTGGTTCTCCTCAAGCGTTCCCTCAAACAGATGAATACAACTTTTATAAATCTATCTTA  
TCTTTTCTTTCCAGTAAAGAAGATTACGATTTTAAAGCCATTTCTCCAGATGTAGAAAATCCCACATTTGACCACCACTT  
CTGCCTGTGTTTTTTCATCAACTCATTGGTCCTTGCAATGGTTTGATTGCCTTGACAGATTCCTGACCACTATCGTGTT  
TAATCCAGCAACTCGAAAGTACAGATTAATCCACCATGCCATTTGGTATTCCGCGCGTTTTAGACGTTCCATTAGC  
GGTATTGGGTTTTGGCTTTGATTTCGGATGCAAATGATTACAAGGTTGTTAGGCTATCAGAAGTTTACAAGGAACCTTGTG  
ACAAACAAATGAAAGCTGATATTTATGACTTTTTCCGTTGATTCTTGGAGAGAAGTTTTAGGTCAAGAGGTGCCTATTGT  
GTATTGGTTGCCATGTGCTGAGATATTATACAAAAGAAAACTTTCATTGGTTTGCCTTGCAGACGATGTAGTAATCTT  
TGTTTTGACATGAACACCGAAAATTTTACAATATGGGAATGCCAGATGCATGTCAATTCGATGATGGAAAAGTGTATG  
GCCTGGTGATTTTATGTAAGTGCATGACGCTGATTTGTTACCCTGATCCAATGCCAAGTAGTCCAACAGAAAAATTGAC  
AGATATTTGGATAATGAAGGAATACGGTGTAAAGGAGTCTTGGATAAAGAGATGCTCAATTAGACTTCTTCTTGAATCC  
CCATTAGCAGTTTGGAAAGGATGGGATATTGCTTCTTCAAAGCAAATGGGACATTTGATTGCCTATGATCATAAATCTG

ATGAAGTTACGGAATTAGATTTGCATGGTCTTCCCACGAGTTTGAGAGTTATAATTTACAGGGAAAGCTTGACCCCGAT  
TCCAAGAAGTAAGAATAGCACAGAACTTGAACAATTTTCAAGAGTGGGATAACTCTTCAACTCTAAAT

>P\_hybrida\_Sm\_SLF9\_A\_AB933097

ATGAAGGAATTGCCCAAGATGTAGTGATTTATATACTTGTAATGCTCCCGGTAAAATCTCTACTACGATTCAAATGCA  
CATGCAAAACATTTTGAATATCATAAACTCGTCCACTTTCTGTTAATCTTCATCTAAATCATAACGACCAATGCCAAGGA  
TGAATTGGTTCCTTAAACGTTCTTCAAACAGATGAATACAACTTTTATAAATCTATCTTATCTTTTCTTTACAGT  
AAAGAAGATTATGATTTTACGCCCATTTCTCCAGATGTAGAAATCCACATTTGACCACCCTTCTGCCTGTGTTTTTC  
ATCAACTCATTGGTCTTGAATGGTTTGATTGCCTTGACAGATTCCTGACTACTATCGTGTTTAATCCAGCAACTCG  
AAAGTACAGATTAATCCCACCATGCCATTTAGTATTCCGCGTGGTTTCAGACGTTCTATTAGCGGTATTGGGTTTGGC  
TTTGATTTCGGAGGCAAATGATTACAAGGTTGTTAGGCTATCAGAAGTTTATAAGGAACCTTGTGACAAAGAAATGAAAG  
TTGATATTTATGACTTTTCCGTTGATTCTTGGAGAGAACTTTTAGGTCAAGAGGTGCCTATTGTATATTGGTTGCCATG  
TGCTGAGATATTATATAAAAGAACTTTTCATTGGTTTGCATTTGCAGACGATGTAGTAATCTTTGTTTTGACATGAAC  
ACCGAAAAATTTCACAATCTAGGAATGCCAGATGCATGCAATTTCAATGACGGAAAGTGTATGGCCTGGTGATTTTAT  
GTAAGTGCATGACCCTGATTTGTTACCCTGATCCAATGCCAAGTAGTCCAACAGAAAACTGACTGATATTTGGATAAT  
GAAGGAATACGGTGAAAAGGAGTCTTGGATAAAGAGATGCTCAATTAGACTTCTGCCTGAATCCCATTAGCAGTTTGG  
AAGGATGAGATATTGCTTCTTCAAAGCAAATGGGACATTTGATTGCCTATGATCATAATTCTGATGAAGTTAAGGAAT  
TAGATTTGCATGGTCTTCCCACGAGTTTGAGAGTTATAATTTACAGGGAAAGCTTGACCCCGATTCCAAGAAGTAAGGA  
TAGCATAGAACTTGAACAATTT

>P\_hybrida\_Sm\_SLF9\_B\_AB933098

ATGAACTATACAAAATGTTGGATGGGACCATGAAGGAGTTGCCCAAGGTGTAGTGATTTATATACTTGTAATGCTCC  
CGGTAAAATCTTTACTACGATTGAAATGCACCTGCAAAACATTTTGAATATCATAAAATCGTCCACTTTTCAATTAATCT  
TCATCTAAATCATAACGACCAATGTCAAGGATGAATTGGTTCCTCAAACATCTTCAAACAGATGAATACAACTTT  
TATAAATCTATCTTATCTTTTCTTTACAGTAATGAAGATTATGATTTTACGCCCATTTCTCCAGATGTAGAAATCCAC  
ATCTGACCACCCTTCTGCCTGTGTTTTTCACTCAACTCATTGGTCCGTGCAATGGTTGATTGCCTTGACAGATTCCT  
GACCCTATCGTGTTTAATCCAGCAACTCGAAAGTACAGATTAATCCCACCATGCCCATTTAGTATTCCGCGTGGTTT  
AGACGTTCTATTAGCGGTATTGGGTTTGGCTTTGATTTCGGATGCAATGATTACAAGGTTGTTAGGCTATCAGAAGTTT  
ACAAGGAACCTTGTGACAAAGAAATGAAAGTTGATATTTATGACTTTTCCGTTGATTCTTGGAGAGAACTTTTAGGTCA  
AGAGGTGCCTATTGTGTATTGGTTGCCATGTGCTGAGATATTATACAAAAGAACTTTCATTGGTTTGCATTTGCAGAC  
GATGTAGTAATCTTTGTTTTGACATGAACACCGAAAAATTTCACAATATGGGAATGCCAGATGCATGTAATTACAATG  
ATGGAAAGTGTATGGCCTGGTGATTTTATGCAAGTGCATGACGCTAATTTGTTACCCTGATCCAATGCCAAGTAGTCC  
AACAGAAAAATGACAGATATTTGGATAATGAAGGAATACGGTGAAAAGGAGTCTTGGATAAAGAGATGCTCAATTAAA  
CTTCTTCCGAAATCCCATTAGCAGTTTGGAAAGGATGAGATATTGCTTCTTCAAAGCAAATGGGACATTTGATTGCCT  
ATGATCATAATTCTGATGAAGTCAAGGAATTAGATTTACATGGTCTTCCCACAAGTTTGAGAGTTATAATTTACAGGGA  
AAGCTTGACCGCAATTTCAAAAAGTAAGGATAGCATAGAACTTGAACAATTT

>P\_axillaris\_S19\_SLF10\_AB933045

ATGTTGGATTGGACCATGAAGGAGTTGCCCAAGATGTTGTGATTTATATATTTGTAATGCTCCCGGTAAAATCTCTGC  
TACGATTCAAATGCACCTGTAAAACATTTTGCATATCATAAAATCATCCACTTTTCAATTAATCTTCATCTAAATCATA  
GACCAACTTCAATGATGAATTGGTTCCTTAAAGCGTTCCTTCGAAACAGATGAATACAACTTTTATAAATCTATCTTA  
TCTTTTCTTTTCGCTAAAGAAGATTATGATTTTAAAGCCATTTCTCCAGATGTAGAAATCCACATTTGACCACCCTG  
CTGCCTGATTTGTATCGACTCATTGGTCTTGAATGGTTGATTGTCTTGACAGATTCCTTACCCTATCGTATT  
TAATCCAGCAACTCTAAAGTACAGACTAATCCCACCATGCCCATTTGGTATCCCGGTGGTTTCAGACGTTCCATCAGC  
GGTATTGGTTTTGGCTTTGATTTCGGATGCAATAATTACAAGGTTGTTAGGCTATCAGAAGTTTACAAGGAACCTTGTG  
ACAAAGAAATGAAAGTTGATATTTATGACTTTTCCGTTGATTTCATGGAGAGAACTTTTAGGTCAAGATGTGCCTTTTGT  
CTTTTGGTTTCCATGTGCTGAGATATTATACAAAAGAACTTTCATTGGTTTGCATTTGCAGACGATGTAGTAATCTT  
TATTTTGCATGAACACCGAAAAATTTCACAATATGGGAATGCCAGATGCATGTCATTTGCTGATGGAAAGTCTTATG  
GCCTGGTGATTTTATTTAAGTGCATGACGCTGATTTGTTACCCTGATCCAATGCCTAGTAGTCCAACAGAAAAATGAC  
AGATATTTGGATAATGAAGGAATACGGTGAAAAGGAGTCTTGGATAAAAAGATGCTCAATTAGACTTCTTCTCTGAATCC  
CCATTAGCAGTTTGGAAAGGATGAGATATTGCTTCTACACAGCAAAATGGGACATTTGATAGCCTATGATCTTAATTCGA  
ACGAAGTCCAGGAATTAGATTTACATGGTTATCCCGAGAGTTTCAAGAATTATAATATACAGGGAAAGTTTGCACCGCAT  
TCCAAGAAATAATGATTGCATAGAACTTCAAATTTTAGATGTAGC

>P\_axillaris\_S19\_SLF10\_AB933046

ATGCACAATACAATACAAAAGATGTGGGATAAGACCATGAAGGAATTGCCAAAAGATGTAGTGATTTATATACTTGTA  
TGCTCCCGGTAAAATCTCTACTACGACTCAAATGCACCTGTAAAACTTTTTGCATATCATAAAATCATCCACTTTTCA  
TAAGCTTCATTTAAATCATAACGACAACCTTCAAGGATGAATTGGTTCCTTAAAGCGTTCCTTCAAACAGATGAATAC  
AACTTTTATAAATCTATCTTATCTTTTCTTTTTCAGTAAAGAAGATTATGATTTTAAAGCCATTTCTCCAGATGTAGAAA  
TTCCACATTTGACCACCCTTCTGCCTGTACTTTTTCATCGACTCATTGGTCTTGAATGGTTTGATTGTCTTGACAGA  
TTCCCTGACCCTATCTGCTTAATCCAGCAACTCGAAAGTACAGACTAATCCCACCATGCCCATTTGGTATCCCGCGT  
GGTTTCAGACGTTCCATTAGCGGTATTGGGTTTGGCTTTGATTTCGGATGCAATGATTACAAGGTTGTTAGGCTATCAG

AAGTTTACAAGGAACCCCTGTGACAAAGAAATGAAAGTTGATATTTATGACTTTTCCGTTGATTCTTGGAGAGAACTTTT  
AGGTCAAGATGTGCCTTTTGTATTTTGGTTTTTCATGTGCTGAGATATTATACAAAAGAACTTTTCATTGGTTTGCATTT  
GCAGACGATGTAGTAATTTCTTTGTTTTGACATGAACACCGAAAAATTTACAAATATGGGAATGCCAGATGCATGCCATT  
TCGATGATGGGAAGTGTATGGCCTGGTGAATTTATTTAAGTGCATGACGCTGATTTGTTACCCTGATCCAATGCCAAG  
TAGTCCAACAGAAAAATTCACGGATATTTGGATAATGAAGGAATACGGTGAAGGAGTCTTGGATAAAGAGATGCTCA  
ATTAGACTTCTTCCCTGAATCCCCATTAGCAGTTTGGAAAGATGAGATATTGCTTCTACAGAGCAAAATGGGACATTTGA  
TTGCCTATGATCTTAATTCGAACGAAGTCCAGGAATTAGATTTAAATGGTTATCCCGATAGTTTGAAGAATTATAATTTA  
CAAGGAAAGCTTGACCGGATTCCAAGAAATAAGGATTGCATAGAACTTCAAAAATTTTCAGATGATT

>P\_hybrida\_Sm\_SLF15\_AB933105

ATGGGAGATGAAATATTGGAAAAATTCGCTAAAGATATCGTGATTTATATATTTTTAATGGTTCCAGTAAAAATCTCTCG  
TACGATTCAAATGTGTCTCAAAAGATTGGTATACTCTCATAACAATCTTCAACATTTATCGGTCTCCATTTTAAATCGTAC  
CACCACCACCACCAAGGATGAATATATGCTCGTCAAGCGCTCTTTTAAAGAAGAATCGAATCGTTTCAGAAGTGAATG  
TCTTTTCTCTCTGGTGGTCTTGTATGATGATGATGATCTTTACCCTGTTTTCTCCGGATCTAGATGTGCCATTTCTGACTA  
CCACTAATCTTGTACTTTCCATAGAATCATGGGCCCATGCAATGGTTTTGATTGTTTTAACAGATAAGATAACTACCCT  
ACTATTC AATCCAGCTACTAGAAGTTATAGGCTACTCCAACCTGGCCGTTTTGGTTGTCCTGTGGGTTTTTCATCGTTCC  
ATTAATGGTGTCTGGGTTTTGGCTTTGACTCTGTTGCGAATAGCTACAAGATTGTTAGAATTGCAGAAGTTAATGGGGAGC  
CTCCTTTTTTATTGTTATACCATGAGAGAGTGGAAAGTTGAAATTTATGAATCTAGCGTTGATGCATGGAGAGAAACAAGA  
TCAAGTGTTCGACAATTGCCCAATGTATTTTTGGTATCCTTGTTTTGAGATGTTTTACAAAGGGGCCTCTCATTGGTTT  
GCCCATGCAATACAATAGTAATTTCTTTGTTTTGACATAATCACTGAAACTTTTTCGCAGTATAAAGTTTTCTAATACTT  
GTCATTTCCAAGACGAGAATTGCTATAGCCTCCTAATTTTAAATGATTCTCTAACTTTGATTTGTTACCCCTATCCAGA  
GAAAGTAGTAGAATATGAAAAAGATTTTCATGGAAATTTGGATAATGATGGAATACGGTGTGGACGAGTCTTGGATTAAG  
AAATATTC AATTACACCTCTTTCTATTGAAACACCATTAGCCGTTTGGAAAGGATCATTTATTGCTCCTTGAAAGCAGAA  
GTGGAAGTTTGAATTTCTACGATCTTAATTTCTGGTGAAGTCAAGGAACCTTAACTTACATTTGTTGGCCAACAAGTTT  
AATTGCAATTTACCAGGAAAGCTTGACTTTAATTTCCAGAAGAGAGAGCATAGTACC AATGCCCAAAAATTTTAGAG  
AGT

>P\_hybrida\_S0m\_SLF7\_AB933078

ATGGCAGAAGGAATACTTAAAGGGTTGTTTGGAGATGTTATGATTTATATACTTTTGAGGCTCCGCTGAAAACGCTGT  
TGCGATTC AATGCATCTCTAAAACATTGTACAATATCATAACAATCATCAACTTTTCATCAATCTTCATCTCAACCGTAC  
CACTACCACCAATGATGAATTCATTTCTTCAACCGCTCCATTAAGAAGCACATAACGAATTTAAAAGTGTCAATGTCT  
TTTTATGCTTGTAGTCACGATAATTATGATATTCATTCTATTTCTCCAGATCTAGATGTTCCAACATGAAGCCCTCTA  
TTTCTAGTGTTCGCATAGACTAATAGGTCCTTGTACACGGTTGATTGTTTTAACAGATACGGTAGAAAACGATCTTACT  
TAATCCAGCTACTAGAAATTATAGGATACTCCGACCTAGTCCTTTTGATTGTCCAATGGGATTCTGTGCTTCCATTGCCG  
GGTGTGGGTTTTGGCTTTGACTCGATTGCGAATGACTACAAGATTGTACGGGTTTTAGAAGACTATGGCGATCCTCCGT  
TCTATGATTTTGCCTTGAGAAAGTGGAAAGATCGATGTGTATGAATTGACTATTGATTCCGGAGAGAACTAGATTATAT  
GGATCTAGAGTTGCCTCATGTCCACAGGTATCCTTGTTCGAGATGTTTTACAACGGGACCACTCATTGGTTTGGAAAGA  
ACGGAAACAGTGGTTATTCTTTGTTTTGACATGAGCACAGAGACTTTTCGCAATATGAAAATGCCGGATGCGTGTCAAT  
TCAAAGACAGGAAGAGTTATGGCCTCGTTGTTTTAAATGACTCTCTAACACTGATCTGTTACC GCCATCCTGGGTGTGT  
AATTGATCCTGCAAAAGACTTCATGGAATTTGGACAATGAAGGAGTATGGTGCAGGTGAGTCTTGGATTA AAAACTAC  
ACGATTGCACCTCTTTCTATTAATCCCCATTAGCAGTTTGGAAAACCATTTCTGCTACTTGAGTACCATCGTAGTG  
GAGTCTGTTTTCTATGATCTTAATTTCTGATGAAGTCAAGGAACCTCAATTTACATGGCTGGCCTCAGAGTTGAGGGT  
ATCAATTTATAAGGAAAGCTTGACTTTAATTTCTTAAAGGAAGCGAGCATAGTACTCAAGTTCAAAAATTTT

>N\_alata\_DD9\_EF420259

ATGATACC GAAGATGGGAGATGGAACCGTGGAAAAATTCGCTAAAGATGTTGTGATTTATATAATTTTGGAGCTTCAGG  
TAAAATCTCTCATTTCGATTC AATGTGTCTCTAAGACTTGGTACATTTCTAATAACAATCATCAACATTCATCTATCTTCA  
TCTCAGTCATACTACCACCAGCAATGATGAATTTGGTTCTCTTCAAGCGTTCTTACAAGAAGAACCAAACCGATTCAA  
AGTGTATTGTCATTTCTCTCAAGTGGTCATGATGATGATCTTCCACCTGTTTTCTCCAGATCTAGACATGCAATATA  
TGACCACCAGTAGTGTACTTGCCATAGGATTATAGGCCCTTGCAATGGTTTTAATTTTTTAAACGGATAAGCTAAA  
TAATGTTCTGTTTAAACCAACTACTAGAAAACACTACAGTTACTCACACCCAGTCCCTTTGGCTGTCCACTGGGTTCCAT  
CGTTCCATTAATTTGTGTTGGGTTTTGGTTTTGACTTGAATGACTATAAGATTGTTTCGGATTTTCAGAAGTTTCGCG  
GGGACCTCCTTTCTATTGTGATTTCTATGAGAGAGTGGAAAGTTGAGGTTTTATGAATTGAGGACTGATTTCTGGAGGGA  
ATTAGATCAAGTAAATCTACAGTTGCCCTATGTGCATTGGAATCCTTGTCTGATATGTTTTACAGTGGGGCCTCTCAT  
TGTTTCGAAATGCTAATACGGTGGTAATTTCTTTGTTTTGACTTAAAGCACCGAGACTTTTCGAAATATGAAAATGCCCTA  
ATACTTGCCATTTCCAGAGATGAAAAGTGTACGGCCTCGTAGTCTTAAATGAATATTTGACACTGATTTGTTACCCCTA  
TCCAGGTAAGGTAATCGATCCTTTAAAAGATTTTCATGGACATTTGGATGATGAAGGATTACGGTGTAAACGAGTCATGG  
ATTAAGAAATACACAATTACCCCTCTTTCTATTGAATCCCCATTAGCGGTTTGGAAAGGATCATTTACTGCTTCTTCAA  
GCAGAAAAGGATTTTTGGTTTTCTATGATCTTAAATCTAAGAAGTCAAAGAATTC AATTTCCATGGTTGGCCAAAAAG  
TTTTGAGAGCAACAGTTTACAAGGAAAGTTTGAATTTACTTCCGAAAGAAAGCGAGCATAATAACAAGTTCAATTT

>P\_hybrida\_S5\_FBX2\_AB932974

ATGGCAGATGGATTTGTCATTAACTCCCCAAGGATGTGATGATTTATATACTTTTAAGGCTTCCAGTAAAAATCCCTTT  
TACGACTAAAATGTGTATCTGAAAATTGGTACACTCTCATACGATCATCGACATTCATCAATCTTCATCTATATCATCC  
GATCAAGGCCAACTGTGAATTCATTCTTTTCAAGCGCTCCTACAACGAAGAACCCAACTTTAGAAAGTATCATGTCT  
TTTCTCTCTAGTTTTTTCAGGATAATAATTGCCTTACCATGTTTCTCCCGATATAGAGGTGCCACATTTGACTACCACTA  
CTTCTTGTATTTTTCAAAGACTCATAGGTCCTTGCCATGGTTAATTGCTTTAGTGGATAACATATCGGTAGTGTATT  
TAATCCAGCTACTAGAAGTTATAGACTACTCAAACCAAGTCTTTTTGGTTGTCCATTTCGGTTTCCGTTCGTTCCATAAAT  
GGTATTGCATTTGGTTTTGACTCGATTACAAATGAATACAAGATTGTTAGGTTAGCAGAAGTTCGCGGGCAACCTCCTT  
TTTATTGTTTTAAGTTTGAGAGAGTTGAGAGTGGAGGTTTATGAATTGAGTATTGATTCATGGAGGGAGGTGGAACATGT  
GGATCAACAGTTGCCTTTTGTGCGTTTGTATCCTTGCTCAGAGTTATTCTACAAAGGGTCTCTCATTGGTTTGCAAAC  
ACAAATACAGTTGTAATTCCTTGTTTTGACATGACCACAGAGACGTTCCGCAATATTTAAAATGCCTAATACTTGCCATT  
TCGAAGACAGGAAGTGTACGGCCTGGTAATCCTGAATGAGTATCTAACATTGATTTGTTACCCTTATCCAGGTTGTGA  
AATTAATCCTGAAATGGATTTTATGGAGATTTGGGTAATGAATGACTACGGTGTAAACGAGTCTTGATTAAGAAAAGC  
ACACTTACACCTCTTCCAATTGAATCGCCACTGGCAATTTGGAAGGATCATTTATTGATCCTTCAAACCATAAGTGGAC  
ATTTGATTTCTGTAATCTTAATTCCTAATGAAGTCAAGCAATTCATTTACATGGTTGGCCAAAAGCTTGAGAGTGC  
AATTTACAAGGAAAGCTGCATAATACACGTTCAACAACCTTTGGAGAGGATTATCTCTCTAACT

>P\_inflata\_unknown\_haplotype

AAGAAAATCAAGATGGCAGATGGAATTGTGATAAAAATTGCCTAAAGATGTGGTGACGTATATATTTTTTGACGTTTCCAG  
TAAAATCTCTCCTACGATTGAAAATGTGTTTCCAGGAATTTGCATACATTCATACAATCATCGGCATTCATTAATCTTCA  
TCTCAATCGTACCAGCATCATCAACGAGGAATTCATTCTTTTCAAACGCTCATTTAAAAGAAGAACCCGATCGATTTAGA  
AATATCATGTCTTTTCTCTCTAGTGGTCATGATAATTATGACCTTACCATGTTTCTCCAGATCTAGATGTGCCATATC  
TGACTACAACAGGAGCTTGTACATCTCACAGATTCATGGGTCCTTGCCATGGCTTAATTGTCTTCACGGATGGTGAAGA  
AACAGAAGTATTATTTAATCCATCAACTAGAAATTATAGGCTACTCACACCTAGCCCGTTTGATAGCCCATTTGGGTTT  
CATCGTAGCATTGACGGTATTGCATTCGGTTTTGATTTCGATTGGAATGATTACAAGATTGTGAGGATCGCAGAACCTC  
ATGGAGAACCACCTTTAATTGTTTTAGTACGAGAGAGTGGAGAGTTGAAGTTTTCGAAATGAGTATTGATTCATGGAG  
AGAGGTAGAAAATGTGGATCAACAACCTGCGTTATGTGCATTTGGTATCCCAGTGCTGATTTGTTCTACAAAGGGGCTCT  
CATTGGTTTGGCAACGAAAATAGAGTCCATGTAATTGTTTTGTTTTGACATGTGTACAGAGATATTTGCGACTTTTAAA  
TGCCTAGTACTTGCCATTACAAAAGACAAAATTTTTACTGCCTTGTAGTCTTGAATAAGTGTCTAACGTTGATTTGTTA  
CCCCTATCTAGGTTATGAAATTGATCCTGCAATTGATTTTCATGGAGATTTGGATAATGAAGGAGTATGGGATATACGAG  
TCTTGGAGTAAAACATACAGAATCAGACCTCTTGCAATTGAATCGCCATTGGCAATTTGGAAGGATCATTTATTGCTCC  
TTCAGAGCATAAGTGGGTATTTGATTTCTATGATCTGAATTCCTGGTGAAGTCAAGGAATTCGAATTGAATGGTTGGCC  
CGACAGTTTGGCAGTAACAGTTTACAAGGAAAGCTTGGCTTTAATTCCAAATTCAAAAGACCCGCGAGCA

>P\_hybrida\_s10\_SLF17\_AB933012

ATGGCAGATGGAATTGTGATAAAAATTGCCTAAAGATGTGGTGACGTATATATTTTTTGACGTTTCCAGTAAAAATCTCTCC  
TACGATTGAAATGTGTTTCCAGGAATTTGCATACACTCATACAATCATCGGCATTCATTAATCTTCATCTCAATCGTAC  
CAGCATCATCAACGAGGAATTCATTCTTTTCAAACGCTCATTTAAAAGAAGAACCCGATCGATTTAGAAAATATCATGTCT  
TTTCTCTCTAGTGGTCATGATAATTATGACCTTACCATGTTTCTCCAGATCTAGATGTGCCATATCTGACTACAACAG  
GAGCTTGTACATCTCACAGATTCATGGGTCCTTGCCATGGCTTAATTGTCTTCACGGATGGTGAAGAAACAGAAGTATT  
ATTTAATCCATCAACTAGAAATTATAGGCTACTCACACCTAGCCCGTTTGATAGCCCATTTGGGTTTCCATCGTAGCATT  
GACGGTATTGCATTCGGTTTTGATTTCGATTGGAATGATTACAAGATTGTGAGGATCGCAGAACTTCTTGAGAACAC  
CTTTAATTGTTTTAGTACGAGAGAGTGGAGAGTTGAAGTTTTCGAAATGAGTATTGATTCATGGAGAGAGGTAGAAAA  
TGTGGATCAACAACCTGCGTTATGTGCATTTGGTATCCCAGTGCTGATTTGTTCTACAAAGGGGCTCTCATTGGTTTGGC  
AACGAAAATAGAGTCCATGTAATTGTTTTGTTTTGACATGTGTACAGAGATATTTGCGACTTTTAAAATGCCTAGTACTT  
GCCATTACAAAGACAAAATTTTTACTGCCTTGTAGTCTTGAATAAGTGTCTAACGTTGATTTGTTACCCCTATCTAGG  
TTATGAAATTGATCCTGCAATTGATTTTCATGGAGATTTGGATAATGAAGGAGTATGGGATATACGAGTCTTGAGTAAA  
ACATACAGAATCAGACCTCTTGAATTGAATCGCCATTGGCAATTTGGAAGGATCATTTATTGCTCCTTCAGAGCATAA  
GTGGGTATTTGATTTCTATGATCTGAATTCCTGGTGAAGTCAAGGAATTCGAATTGAATGGTTGGCCCGACAGTTTGGC  
AGTAACAGTTTACAAGGAAAGCTTGGCTTTAATTCCAAATTCAAAAGACCCGCGAGCA

>P\_hybrida\_s9\_SLF16\_AB932997

ATGTCGGATGAAATTTGTGATAAAGTTGCCTAATGATGTGGTGATGTATATACTTTTGAATTTCCAGTAAAAATCTCTCT  
TACGATTCAAACGTGTTTCTAGAGATTTGTATACTCTCATACAATCATCGGTACTCATAAATCTTCATCTCAATCGTAA  
CATACCAGCAACAATGAATTCATTCTTTTCAAACGCTCATTTAAAAGAAGAACCCAACTTATTTAGAAAGTATCATGTCC  
TTTCTCTCTAGTGGTCATGATGATTATGATCTTACCCTGTTTCTCCAGATCTAGATGTGCCATATCTGACTAACACAG  
GAGGCTGTACGTTTTCACAGATTCATGGGTCCTTGCCAGGGCTTGTGGTTTTAACAGATTGCGAAGAAACAGTACTATT  
TAATCCATCAACTAGAAATTATAGGCTACTCCAACCTAGCCCGTATGATAGTCCATTGGGTTTCCATCGTAGCATTAA  
GGTATTGCATTCGGTTTTGACTCGATTGGAATGAATACAAGATTGCGAGGCTTGCAGAACTTCGTGGGGAACCACCCT  
TTAATTGTTTTACTATGAAAGAGTGGAGAGTTGAGGTTTACGAATTGAGCATTGATTCATGGAGAGAGATAGAAAATGT  
GGATCAACAGCTGCCTTATGTGCATTTGGTATCCGTGTGGCGAGTTGTTCTATAAAGGTGCCGCTCATTGGTTTGGCCAC  
GCAAATAGAGCTCGTGTAAATTCCTTGTTTTGCATTAGTACGGAACATTTTCGCGATATTTAAAATGCCTAATACTTGCC

ATTACAAAGACAGGAAGTGTACGGCCTTGTTGTCTTGAATGAATGTCTAACGTTGATTTGTTACCCCTATCCAGGTTG  
TCAAATGATACTGCAATAGATTTTCATGGAGATTTGGATGATGAAGGAGTATGGTATAATCGAGTCTTGGAGTATGAAA  
TACAAAATCACACCTCTTGCAATTGAATCGCCATTGGCAATTTGGAAGGATCATTTATTGCTCCTTCAAAGCATAAGTG  
GGTATTTGATTTCCATGATCTGAATTCTGATGAAGTCAAGGAATTCGAATTGAAAGGTTGGCCCGAGAGTTTGGCAGT  
AAATGTTTACAAGGAAAGCTTGGCTTTAATTCCAAAAGACCGCGAACATAATATGCGGTTATCAATT

>P\_hybrida\_S9\_SLF16\_AB932998

ATGTCGGATGAAATTGTGATAAAGTTTCCTAATGATGTGGTGTATATACTTTTGAAATTTCCAGTAAAATCTCTCT  
TACGATTCAAACGTGTTTCTAGAGATTTGTATACTCTCATAACAATCATCGGTACTCATAAATCTTCATCTCAATCGTAA  
CATCACCGCCAACAATGAATTCATTCTTTTCAAACGCTCATTAACGAAGAACCCAACCTTATTTAGAAGTATCATGTCC  
TTTCTCTCTAGTGGTCATGATGATTATGATCTTACCCTGTTTCTCCAGATCTAGATGTGCCATATCTGACTAACACAG  
GAGGCTGTACGTTTACAGATTCATGGGTCTTGGCAGGGCTTGTGGTTTTAACAGATTGCGAAGAAACAGTACTATT  
TAATCCATCAACTAGAAATTATAGGCTACTCCAACCTAGCCCGTATGATAGTCCATTGGGTTTCCATCGTAGCATTAAC  
GGTATTGCATTCGGTTTTGACTCGATTGAAATGAATACAAGATTGCGAGGCTTGCAGAACCTCGTGGGGAACCACCTT  
TTAATTGTTTTACTATGAAAGAGTGGAGAGTTGAGGTTTACGAATTGAGCATTGATTCATGGAGAGAGATAGAAAATGT  
GGATCAACAGCTGCCTTATGTGCATTGGTATCCGTGTGGCGAGTTGTTCTATAAAGGTGCCGCTCATTGGTTTGGCCAC  
GCAAATAGAGCTCGTGTAAATCTTTGTTTTGACATGAGTACGGAACATTTTCGCGATATTTAAAATGCCTAATACTTGGC  
ATTACAAAGACAGGAAGTGTACGGCCTTGTTGTCTTGAATGAATGTCTAACGTTGATTTGTTACCCCTATCCAGGTTG  
TCAAATGATACTGCAATAGATTTTCATGGAGATTTGGATGATGAAGGAGTATGGTATAAATTGAGTCTTGGAGTATGAAA  
TACAAAATCACACCTCTTGCAATTGAATCGCCATTGGCAATTTGGAAGGATCATTTATTGCTCCTTCAAAGCATAAGTG  
GGTATTTGATTTCCAATGATCTGAATTCTGATGAAGTCAAGGAATTCGAATTGAAAGGTTGGCCCGAGAGTTTGGCAGT  
AAATGTTTACAAGGAAAGCTTGGCTTTAATTCCAAAAGACCGCGAACATAATATGCGGTTATCAATT

>P\_axillaris\_S19\_SLF14\_AB933050

ATGAAGATCGCATTGGAAAGAAATCCATGATGGCAATGGAGTTGTGAAAAAATTGCCAAAAGATGTGGTGAATAATATAA  
CCTTAAAGCTTCCAGTAAAATCTCTCTTGGCATTAAATGTGTCTCTCAATTTTGGTACGCGTACATAACAATCATGGGC  
ATTCATCATTCTTCATCACAATTTGTGCTAGCAGTGTCAACGATGAAATTATTCTCTTCAAGCGCTCGTTCAAAGAAGAA  
CATGACCATTTTAAAAGTATTATGTCATTTCTCTCTAGTGGTCATGATGGCGATGACTTTCACCATGTCTCTCCCGATT  
TAGAAGTGCCATATCTAACTAACACTGCTTCTTGTACTTTTACCAGATTCAATGGTCTTGGCATGGTTTTAATTGTATT  
AACGGATAAAGTAACTGCAGTATTATTTAATCCAGCAACTAGAAATTATAGGCTACTCAAACCTAGCCCTTTTGGCAGT  
CCACTAGGTTTCCATCGTTCCATTAATGGTATTACATTTGGTTTTGACTCGATTGCAAAATGAATACAAGATTGTGAGAC  
TTGCTGAAATTCGTGGGGAGCCACCTTCTATTGCTATTCTGTGAGAGAGTGGAGAGTTGAGGTTTTATGAATTGAGCAT  
TGATTCATGGAGAGAGGTAGAAAATGTGGATCAACAGTTGCCTTATGTGCATTGGTATCCTTGGCCTGAGTTATTCTAC  
AAAGGTACATCTCATTGGTTCCGAAACACAAATACAGTTGTTATTCTTGGTTTTGACATGAGTACCGAGACTTTTCGCA  
ACATTTAAAATGCCTAATACTTGTCAATTTCAAGGACAGGAAGTGTATGGCCTCGTAGTCTTGAACGAGTCTCTAACGTT  
GATTTGTTACCCCTATCCACGGTGTGAAATTGATCCAGCAATAGATTTTATGGAGATTTGGATAATGAAGGAGTACGGC  
GTAAATGACTCTTGGAGTAAGAAGTACACAATTATACCTCTTGGCATTGAATCACCATTGGCAATTTGGAAGAATCATT  
TATTGCTACTCCAAAGCATAACTGGACATTTGATTTCTATAATCTTAATTCTGATGAGATCAAGGAATTCATTTACA  
TGGTTGGCCTAAAAGTTTGGAGTAAAATTTACAAGGAAAGTTTGCATTAATTCCAAAAGAAAGTGAAGTTAATACAG  
CTCAATAATATTAGAGCAGAT

>P\_hybrida\_S22\_SLF18\_AB933071

ATGGTGGAGGGACTTTTGAACCAATGATTTAACTATTTATATACTTTTGATTCTTCCGGTGAAGCTCTGA  
TGCGACTGAAATGTGTTTCCAAAACCTTGTACTCTCATAACAATCGTCTGCCTTCGTGGATCTTCATCTAAATCGCAA  
AACAACTCCAAAGATGAGTGCATTTCTTAAAGCGTTCCTCGAAGAAGGAATCAACCGATATAAAACTAGCTTGTCT  
TTTCTTTGCGGTGATGACCATGATTATCTTAGTCCGATCATTCATGATGTAGATGTGACACATTTGACAACCAATTGTA  
ATTTCTGCCATGATCAACTTGTGCGTCTTGGCATGGATTGATCGCTTAAATGCACCTCTCTACCCTGTTTTATTTAA  
TCCATCTACTAGAAAATATAAGCTTCTCCCACCCAGTCTCTTCGTCATCTAAAGGATTTCTATCGTTCAATGGAAGGT  
GAAGGTTTTGGCTTCGACTCCATTATAAATAACTACAAGGTTGTTAAAATTTCAACTATTTATAAGGTTGATCATTTTCG  
ATTATCTTGAAGAGATTGGGAGAAAAGTAGAGGTCTATGATTTAAGCACTGATTCTTGGAGAGAATTGGATCATGTGGC  
TCAAGAGTTGACCACATTTATGCTGTGTCGAGTGTACCCAGATGTTCTACAAGGGAGCTTGGCATTGGATTGCAACTCAA  
GATCTTGACGCATTCAGAATTTCTTTGTTTTGACATGAGCTCTGAAGTTTTTTCGAAGTTTGAATAATCCTGAAAATGTCT  
ATTTATTCGAGGGACCATGGTGTAGGCTCGCGTTAATACAAGAGTCTCTAACGTTAATTTATTCGCTATCCGGATCA  
ATCGACTGCTCAAGGAAAAGATTGTCGCTTGTGGATAATGAAAGATTACAGTGTACATGAGTCTTGGGTTAAGAAT  
TACACTATTACTTCTGTTTCTATTCTCATTAGCTGTTTGGAAAGGTTATTTGTTGTTTTTGAAGGTTAAAAGTG  
GATGTTTGTATGCTTATGATCTGATTTGCAATAAAATCAAGGAGTTGAATTTTCATGGCTTTCCTGAAAGTCTCAGAGC  
TTTGGTTTACAAGGATAGCTTGAATCAATTCCAATTGGAAGCGAGCATTCTGCACAAGTTTACAGATTT

>P\_hybrida\_S11\_FBX1\_AB933024

ATGGCAGATCGAATTACGAAGAGTTGACACAAGATGTGATTGTCCATATACTTATAAGGCTTGCAGTGAACCTCTTA  
TGCGATTGAAATGTGCTCGAAAAGTTGTTACTCTTATAAAAATCCTCCACTTTCCTCAATCTTCATATCCACAGAAA  
AACAACTTCCAAAGATGAACTCATTCTTCAAGCGTTCAATTCAGCAAAACACTGGCCAATATACTACGATCTTGTCA



TTTCTGTCTGGCGATGATGATGACTATCTTAACTCGATTTTTCCAGATCTAGATGTGACTCATCTTACCTCGATTCATC  
ATTATAATAATGATCAACTCGTCGGTCCTTGCCATGGTTTTGATTGCATTGATGGACTCCCATATCACCATCTTATTTAA  
TCCGCTACCAGAATTTATAAACTTCTGCCGCCAACCCCTTTGGTTGTCAAAAAGGTTTTTTTTGATTCAACCGAAGCT  
GTTGGATTTGGCTTCGACTCTATAGCCAACGACTACAAGTTGTTAGAATTTCAATAATTTACATTGTTAACGACGGGT  
ATCCAGATGAGCATGAGAGAAAAGTTCCAGATCTATAATTTGAGTAATGATTATTGGAGAGAGATAGATCATGCTGGTCA  
ACAACCTGACCACGTTTTTTTATTGACCAATGTTCTCAAATGTTTTACAAGGGAACCTGTCACTGGATTGCATCTCAAGAC  
ATAGACGCATTCTTAGTTCTTTGTTTTGACATGAGCACCAGATCTTTTGAAGTTTTAAAATACCCGAAACTTGTCAAT  
ACTCTGATGGACCATGTTGTAGACTTGTTTTTATTACATGATTCTCTAACATTGATTTATTACCCCTACCCAGAGCCTGT  
GATTCTCTGGAAAAAGAGATGCTGAACGTTTTGGGTAATGAGGGATTACAGTACATATGAGTCTTGGATTA AAAAGTAC  
ACAATTACAGGCCTTCTATTGAAACTCCATTAGCAGTTTTGGAAGAATTGTTTTGTTGCTTTTTTTCAGAATAGAAGTGGCT  
GTTTTGATGTCCTACAATCTTGAATCCAATGAAGTCAAGGAATTAACCTATCATGGCTATCCTCAAAGTCTGAGAGTCGC  
AGTTTACAAGGATAGCTTAGCTTCAATTTCCAAGAGAAAAGTTCAGCAAGTTTCATAAAATTC

>P\_axillaris\_S19\_SLF6\_AB568422

ATGGCTGATGGAATTATCAAAAAGTTGTCCGAAGATGTGGTTATTTTTTATATTTTTTTCAGACTTCCAGTAAAAATCTCTCA  
TGCGATTCAAATTTGTCTCGAAAATCATTTTTTCACTCTCATAACAATCCTCAACCTTTATCAATCTTTATCTCTACAACAC  
AACAACTTCTAGAGATGAATATATTCTGTTAAAGCGTTGCTTCATAACAAGAAAACAACCAATATGAGACTATTTTTGTCT  
TTTTCTTGCTGGTGGTGGTATGATGATTATCTAAACCCAATTTTTTCAAGATCTAGATGTGACTCATCTGACCTCCACTCGTA  
ATTGTGATCATGATCAACTCATCGTCCTTGTCTATGGTTTTAATGGCGTTGATGGACACCCAAACCCTATCTTATTTAA  
TCCATCTACTAGAAATTATAGACCTCTCCGACCCAGCCCTTTGGTTGTCCACAAGGTTTCCATCGTTGTATCCAAGCT  
GTTGGGTTTGGCTTTGACACTGTCTCAAATGACTACAAGTTGTTAGAATTTTCGATAATCTATAAGGTAGACTACGATG  
ACGAGTATCCAGTAGAGCGTGACCGAAAGTTTTGAAGTTTATGATTTGGGTATTGATTATTGGAGAGAATTAGATAATTT  
GAGTCAAGAGTTGACGACGTTTTGTGTTACTCATTGTTCTCAAATGTTTTACAAGGGTGCTTGTCAATTGGATTGCATCT  
CTAGACATAGACGTTACATAATCTTTGTTTTCGATATGAGCTTTGAGACTTTCCGAAGTCTAAAATTTCTGAATCTT  
GTCATATAATTAACGGACCGACCTGCAGACTCGCTTTAGTGCATGACACTTTGACGTTGATTTATTACCCCTACCCGGA  
GCCCCGAGATTCCTGTGGAAAAAGATTTGATAAACATCTGGTTTATGACGGAATACAACGTATATGAGTCTTGGATCCGA  
AAATACACAATTAGAGGTCTTCTTATTGACTCCCCATTAACAGTTTGAAGGGTTATTTGTTGCTTTATCAGAGTAGAA  
GTGGATACTTGATGTCCTATAATCTTAATTTCCAACGATGTGAGGGAATTCATTTTTTTCATGGTTATCCTAAAAGTCTTAG  
AGCTATAGTTTACAAGGATAGCTTGACTTCAATTTCCAAGAGAAAAGCGAGCATGCAAAAACAAGTTTATAAAATTT

>P\_axillaris\_S19\_FBX3\_AB933055

ATGAATAAATTTGGCCCAAGATATGGTTGTTAATATACTTTTGGAGGCTTCCCGTAAAAATCTCTCATGCGATTCAAATGTG  
TCATTA AAACTTATTACAGTCTCATAACAATCCTCCTCTTTCATCAATCTCCAGCTCAACCGTGTCAACCACTGACAAAAGA  
TGAATTTGGTTCTTTTTAAGCGCTCATTCCAAGAAGATATTCACCGACATAAAAATCTTTGTCTTTTCTTTCCAGCAGT  
GATGTTGATAGTTCTCTCAACCCATCAGTCCAGATCTAGATGTGCCTCGTATGACCAATGCTTATAGTAATAATTTTG  
ATCAACTTATTGGTCTTTGCAAAGGTTTGGATTGCTTTGATGAATCACCTTGTCACTGTCTTAATTAATCCATCCACTAG  
AAATTATAGGCTGCTCCCATCTAGTCCTTTTGATTCTCCACCGGGTTTCTATCGTCTTATTGAAAGTGTGGGTTTGGC  
TTTTGACTCCATTGCAAATGATTACAAAGTTATTAGAATTTCTAGAAGTTTACTGGATAGATCATGGGTATCCTCTAGGAG  
GTGAGAAAAAAGTTGAGATTTATGATTTGGGTATTGATTCATGGAGAGAATTGGATCATGTGGATCAACAATTTCCCCA  
GTTGCATTGGTTACCATGTTTACAAATGTTTTACAAGGGGGCTTGTCAATTGGATTGCCATCCCGTTGGTAGACCCGATG  
GTAATTTTATCTTTTGTCTGAGTACTGAGATCTTTTCGCACCATTA AAATGCCTGACAATTTGTTGTTTTTTCAGATGGAC  
CGTGTATAGCCTCGTGTTC CAATGATTCTCTTACATTAATATGTTACCCGGATCCAGCACAGGTTGTTGATCCTAC  
AAAAGATTTGATAGACATATGGATAATGAAGGATTACGGTGTCCATGAATCATGGATTAAGAAAAATACAATTTATACGT  
CTTTCGATTTGTATCTCCATTAGCAGTTTGGAGAGAATCTTACTGCTTTGTGAACGCAAAAATGGAATTTTGTGTTCT  
ACAATCTTTGTTCCAATGAAGTCAAGGATTTCAATTTACATGGTTCTCCTAAAAGTCTGAGAGCAATGGTTTACAAGGA  
AACCTTA ACTCCAATTTCAAAAAGGAAACGAGAAGAGCACAGAAGTTCAAAAATTT

>P\_axillaris\_S19\_SLF4\_AB568410

ATGAAATTAATTTGTAAGAATAACAAGATGGCGGATAGAATTTAATGAAATTTGCCCAAGATGTGTTTATTTATATAC  
TTTTGAAGCTTCTGTGAAACTTCTCATGCGATTTCAGATGCGTCTCTAAATCATGTTACACACTTATACAATCTTCTGC  
TTTTATCAATATTCATCTACACCGCACCAACACCCGGAAGATGAATATATTCTCTTCAAGCGCTCCTTCAAAGAAGAT  
GTTGAAAGTTATAAAGGCATCATTTCTTTTTTTTTCTAGTCATAATGATGATGGCAATCTAAACTCTATTATCCAGATT  
TAGATGTTCCCTAATATGACATCCCTTTTATAGTATTGACTATGACAAACTCATTGGTCTTGTGCATGGTTTTGATTGCTGT  
GATGGATTACGTTCCACCATCTTGTCAATCCATCTACTAGAAAATATAGACTGCTCCCTCAAGTCTTTTGGCATT  
CCGAAGGGATACTATCGATCCATTGAAAGTGGTGGGTTTTGGTTTTCGACTCCGTTGTTAATGACTACAAGGTTTTTCGAA  
TTTTCTGATGTTTACACCGAAGATCGATTCCGGGTATCCTGAGGAGGGAGAGAGAAAAGTTGAAGTTTATGAAGTGGGTAT  
TGATATTTGGAGAGAATTGGATCAGTGGATCAAGAGTTGCCAGATTGTTTTGGTTGACTTCTTCGATGTATTATAGT  
GGAGCTTACCATTGGATTACAACTTTAAATCATGAAGACCAACTGATAATCTTTGTTTTGACATGAGTACTGAAATTT  
TCCGCAACATAAATACGCTGATACCCGTC AATTTCCAAGTGAACATGTCATAGCCTCGTGTGTTGAATGAGTGTCT  
AAGTTTCATGTGTTACCCCTATCAAGGTCAAGGACCCGAGATTGACCATAACAAGATTTGATTGATATTTGGATGATG  
AAAAATTAATGTTTACGAGTCTTGGACAAAAGAAATACATAATTAGAGTTCTTCTTATTTGATGAATCACCATTAGCAG

TGTGGAAAGATTCTTTATTGTTTTTTCAAGGAAAAAGTGGATATTTGATGTCGTGTGATTTTAAATCCGAAGAAGTCAA  
GGAATGGAATTTACACGGTTGTCAGAAAAGTATGAGAGCTATAGTTTACAAGGAAAGCTTGGTTGCAATTTCCAAGTGA  
AGCCAAAGTAGTACACAAGTTCAAAACATT

>P\_hybrida\_Sm\_SLF12Sm\_A\_AB933101

ATGCCGGACGGAATTATTATGAAATTGCATCAAGATATTATTATCTATATGCTTTTGAGGCTTCCAGTAAAGTTTCTCT  
TGCGATTCAAATGCATTTCTAAATATTGTCACACTCTCACAAAATCTTCCACTTTTATCAATATTCATCTCAACCGCGC  
CACAACCTCAGAAGATGAATATATTCTTTTCAAGCGCTCCTTCAAAGAAGATGTTGAAAGCTATAAAGGCATATTTTCT  
TTTCTTTCTACTGATAATGGTGATGATCTTAACTGTATTTTCCAGATCTAGATGTTCCCTAATATGACATCCCTTTATA  
GTATTACGCAGGACAAACTCATTGGTCCTTGCCATGGTCTGGTTGCTGTGATGAATGTAAGTTCCATCATCTTGTTAAA  
TCCAGCTACTAGAAAATATAGACTGCTCCCGTCAAGCCCATTTGGTGTACTAAGGGATTCTATCGTGACATTGAAAAT  
GGTGGGTTTGGTTTCGATTCCGTTGTTAATGACTATAAGGTTTTTATAATTTCTGAAGATTACACAGAAGATCGTTATG  
GGTATCCTGAAAAGGGAGAGAGAAAAGTTGAGGTTTATGAATTGGGTATTGATGTCTGGAGAGAATTGGATCATGTGGA  
TCAACAGCTGCCCAAGTTGTTTTGGATGACTTCTTCGATGCCTTATAATGGAACCTTATCATTGGTTAATAACATTAAGT  
TATGAACATCGATTGATACTTCTTTGTTTTGACATGAGCACTGAAATTTTTTCGCTATATCAAGACGCCTAACACTCGCT  
ATTTTTCAAGTGAACACGCCATAGCCTCGTGCTCCTGAATGATTGTCTAAGCTTTCATGTGTCACCCCTTTCCAGGACC  
CGAGATTGATCCAACAAAAGATTTTATTGACATCTGGATGATGAAAGATTATAATGTTTATGAGTCTTGGATAAAATATA  
TACACAATTAGAATTTCTTCCCTATTCATGAATTTCCCTTTGGCAATATGGAAAGATTCTTTGTTGTTTTTTCAAGGAAAA  
CTGGATATTTGATGTCATATAATCTTAATACCGATGAAGTCAAGGAACCTGAGTTTAAACGGTTGTAAGAGAAGTATGAG  
AGCTATAGTTTACAAGAAAAGCTTGGCTCCCATTTCCAGAAGGAAGCGAAAGTAGTACACAAGTTCAACAACCTC

>P\_hybrida\_Sm\_SLF12\_B\_AB933102

ATGCCGGACGGAATTATTATGAAATTGCATCAAGATATTATTATCTATATGCTTTTGAGGCTTCCAGTAAAGTTTCTCT  
TGCGATTCAAATGCATTTCTAAATATTGTCACACTCTCACAAAATCTTCCACTTTTATCAATATTCATCTCAACCGCGC  
CACAACCTCAGAAGATGAATATATTCTTTTCAAGCGCTCCTTCAAAGAAGATGTTGAAAGCTATAAAGGCATATTTTCT  
TTTCTTTCTAGTAATAATGGTGATGATCTTAACTGTATTTTCCAGATCTAGATGTTCCCTAATATGACATCCCTTTATA  
GTATTACGCAGGACAAACTCATTGGTCCTTGCCATGGTCTGGTTGCTGTGATGAATGTAAGTTCCACCATCTTGTTAAA  
TCCAGCTACTAGAAAATATAGACTGCTCCCGTCCAGCCCATTCAGTGTTCCTAAGGGATTCTATCGTGACATTCAAAT  
GGTGGGTTTGGTTTCGATTCCGTTGTTAATGACTATAAGGTTTTTATAATTTCTGAAGTTTACACAGAAGATCCTTACG  
GGTATCCTGAAGAGGGTGAGAGAAAAGTTGAGGTTTATGAATTGGGTATTGATGTCTGGAGAGAATTGGATCATGTGGA  
TCAACAGCTGCCCAAGTTGTTTTGGATGACTTCTTCGATGCCTCATAATGGAGCTTATCATTGGTTAATAACATTAAGT  
TATGAACATAAATTGATACTACTTTGTTTTGACATGAGCACTGAAATTTTTTCGCTATATCAAGACGCCTAACACTCGTT  
ACTTTTCAAGTGAACACGCCATAGCCTCGTACTCCTGAATGATTGTCTAAGCTTTCATGTGTCACCCCTTTCCAGGACC  
CGAGATTGATCCGACAAAAGATTTTATTGACATCTGGATGATGAAAGATTATAATGTTTATGAGTCTTGGATAAAATATA  
CACACAATTAGAATTTCTTCCCTATTCATGAATTTCCCTTTAGCAATATGGAAAGATTCTTTGCTGTTTTTTCAAGGAAAA  
ATGGATATTTGATGTCATATAATCTTAATACCGATGAAGTCAAGGAACCTGAGTTTAAACGGTTGTAAGAGAAGTATGAG  
GGCTATAGTTTACAAGAAAAGCTTGGCTCCCATTTCCAGAAGGAAGCGAAAGTAGTACACAAGTTCAACAACCTT

>P\_axillaris\_S19\_SLF5\_AB568416

ATGAAGATGCCACATGGAATTATGAAGAAATTGCCTGAAGATATGATTCTATGTATATTTCTGAGGATTCTGTAAAAT  
CTCTTATGCGATTCAAATGCGTCTCTAAAACCTATTACACTCTCTTACAATCCACCACCTTCATCAATCTTCATCTCAA  
TCGCACCACAACGGTGAAAGATGAATTCATTCTCCTTAAGCGCTCTTTCAAAGAAGATCTTAATCAATATAAAACTATA  
TTTTCTTTCTTTCAGGTGATGGTGATCATGATTATCTTAACCCCATTTTTTTCAGATTTTGATGTGCCTAATATGACC  
ACACTCAGAGTATTATTTTTGATCAACTCATTGGTCCTTGTGATGGTTTGATTGCTTTGATGGATGATTTTACAACAT  
CATATTTAATCCATCTACAAGAAATTTTAGGCTACTCCCTCCAGCCCTTTTGATCGTCCAAAGGGATACCACCGATCC  
ATCAAATGTCTTGGATTTGGTTTTGACTCAGTTGTTAATGACTATAAGGTTGTTAGAATATCTGAGTTTCTCAAGGATG  
ATTGTTACGGATATGTTCAAGTGGAAGAGGAAAATGTTGAGATTTATGAACTGGGGATTGATTGTTGGAGGGAATTGGA  
TCGTGTAATCAACAATTTCTACCATATTTTGGGTGCCTTGTCTCAGATTTTTTATATGGGAACCTTTTCATTGGATT  
GCCCAAAGGGTAATTTCTTTGTTTTAACATGAGTACTGAGATTTTTTACCATATAAGGATGCCAGATCCTTGTCAATA  
TTCGCAATCATAGCCTCGTCACTAAATGAGTCCCTAACCTTGATATGTTACCGTTCCGTAGCGCCAACAAGTGATCC  
AATAGAAGATTTGATGGAATTTGGATATTGAAAGATTATGATGTATCTGAGTCTTGGGTTAAGAAATACACAATTAGA  
AGTCTTCTTATAAAATCCCATTTAGCCATTTGAAAGACAATTTATTGCTTTTTTCAAACAGAAGTGGATATTTGATGG  
TATATGATCTTTCGTAAGTGTCAAGGAATTAATAATATACATGGTTGTCCCGAAAGTATGAGAGTACAGTTTACAA  
GGAAAACCTGACTATAATTTCAAGTGAAGCGAGAGCAGTACATCAGTTCAACAAGTTT

>P\_axillaris\_S19\_SLF5\_AB933041

ATGCCACATGGAATTATGAAGAAATTGCCTGTAGATGTGATTCTTTGTATATTTCTGAGGATTCTGTAAAATCTCTTT  
TGCGATTCAAATGCATCTCTAAAATTTACTCTCTCTTACAATCCACCATCTTCATCAATCTTCATCTCAATAGCAC  
CACAACGGTGAAAGATGAATTCATTCTCCTTAAGCGCTCTTTCAAAGAAGATATTAATCAATATAAAACTATATTTTCT  
TTTTCTTTCAGGTGATGGTGACCATGATTATCTCAACCCCATTTTTCCAGATTTTGACGTGCCTAATATGACCACACTC  
AGAGTATATTTTTGATCAACTCATCGGTCCTTGTGATGGTTTGATTGCTTTGATGGATGATCTTACAACATCATATT  
TAATCCATCTACAAGAAATTTTAGGCTACTCCCTTCCAGCCCTTTTGATCGTCCAAAGGGATACCACCGATCCATCAA

GGTCTTGGGTTTAGTTTTGACTCAGTTGTTAATGACTATAAGGTTGTTAGAATATCCGAGTTTCTCAAGGATGATTGTT  
ACGGGTATGTTCAAGTGGAAAGAGGAAAATGTTGAGATTTATGAACTAGGGATTGATTGTTGGAGGGAATTGGATCATGT  
AAATCAACAATTTCTAAAATATTTTGGGTGCCTTGTTACAGATTTTTTACATGGGAACTTTTCATTGGATTGCCAA  
AGGGTAATTTCTTTGCTTTAACATGAGTACTGAGAATTTTCACCATATAAGAATGCCAGATCCTTGTGATAATATTCGCA  
ATCATAGCCTCGTCATCCTGAATGTGTGCCTAACCTTGATTTGTTACCGTTCATAGCGCCAACGAGTGATCCAATAGA  
AGATTTGATGGAAATTTGGATATTGAAAGATTATGATGTATCTGAGTCTTGGGTTAAGAAATACACAATTAGAAGTCTT  
CCTATTAATCCATTAGCCATTTGGAAAGATAATTTATGCTTTTTCAAAGCAGAAGTGGATACTTTGATGTTATATG  
ATCTTTGTACTGATAATGTCAAGGAATTAATATACACGGTTGTCTGACAGTATGAGAGTCGTAGTTTACAAGGAAAA  
CTTGACTATAATTTCAAGTGAAGGCGAAAACAGTACACCAGTTCACAAATTT

>P\_persica\_ppa026586m\_PG6

ATGACAGAGGAAATGGAGGTGCAAATCCTAGCAAGGCTGCCTCCCAAATCCCTAATGCGATTCAAATGTGTGTGTAAT  
CATGGCACGCTCTCCTCAATAACCCCATTTTTGTAGCCAAGCACCTTCACCTGTACAACAACCAACCTTCCCTCGACTTG  
CATCCTCTTCAAGCGTTCTGTCTCAGCAGGACAGAACACAACAAGGAGGAGCTCGTATTCACATTCCTTAATCTTCGC  
AACGACAACAAAAGCAATGCTGATCATAACCTTATCAATTGTAACGTTGAGGACCTCCATTTCCACGTTCTATGGGTT  
TAAAAAGTAGGGGCCAATTCATTGAGCTCCCTGGTTTGGAGCTTGGTGAATCTGTCCACATTGTAGGTCATTGTGATGG  
GTTGTTTTGTTTGTCTCTTTACACTGGAGAACTTGTTTTTCTATAATCCAGCTATCAAGGAGTTTAGGGTTCTTCCCAA  
TCATGCCTTGAAGATGCCTTCTCATGCACCTTTGGGGTTTGGCTATGATCCCAAACGTAAAGATTATGTAATCTCAGCA  
TTATGTCTTATGGGGAGGAAATATTGGATGACGAGCGTCTCGTCATCCATCCTCCCAAAGCAGAAATATACACATTGAG  
CACTAATTTCTGGAGGGAGATTGAGACTCATTACTTGGAAACAGAAACGACCTACTTTTGGGGCAATGAGACTTTCTCG  
ACCTATTTCAATGGAGTGTTTTATTGGTTGGGGTATGAGGAGAAAAAGGAGTTTGTGTCTTTCTATGACAGGCTTGAGG  
AGGAAAAAGCAAGTATCATTTTGTGTTGACACATTTGATGAAGTTTTTACAATATGCCACTTCCGGATTGTTTCTA  
TGAGTTTCCAATCATGAAATGTCCCTTACGGTGTGGAACGAATCCATTGACACCATTGCTCTTTTCCGGGTTTTATCGT  
TGCGAATTTGAAACCTTTGAGGTTTGGGTGATGGATGAGTTTGTGAGGTTGGACAAAACACTTATCTGTTGTGCCAAAG  
TGGATCAGGAGGTGGATATAACCATTTGGCACTTTGGAGGAGGAACGAGGTTCTTTTGGTTGACAGAGATGGACGCATATT  
CAGCTACAATTTCCATACCGAAAAATCTTAAGTTTTTCCCTGTTTCATGGTGTATCCAGAGGAGATTTTCCAGGCTGTTGTT  
TGTGTTAATAGTATAGTTCCAGTCAA

>P\_mume\_SLFL3\_AB280958

ATGACATACTTTTACAAAATGACAGAAGAAATGGAGGTGCAAATCCTAGCAAGGCTGCCTCCCAAATCCCTAATGCGAT  
TCAAATGTGTGTGTAATCATGGCATGCTCTCCTCAATAACCCCATTTTTGTAGCCAAGCACCTTCACTTGTACAACAA  
CCAACCTTCCCTCCACTTGCCTCTTCAAGCGTTCTGTCTCAGCAGGACAGAGCACAACAAGGAGGAGCTTGTATTC  
ACATTCCTTATTCTTCGCAACGACAACGAAAGCAATGCTGATCATAACCTTATCAATTGTAACGTTGAGGACCTCCATT  
TCCCACGTTCTATGGGTTTTAAAAAGTAGGGGCCAATTCATTGAGCTCCCTGGTTTGGAGCTTGGTGAATCTGTCCACAT  
TGTAGGTCATTGTGATGGGTTGTTTTGTTTGTCTCTTTACACTGGAGAACTTGTTTTTCTATAATCCAGCTATCAAGGAG  
TTTAGGGTTCTTCCCAAATCATGCCTTGAAGATGCCTGCTCATGCACCTTTGGGGTTTGGCTATGATCCCAAACGTAAAG  
ATTACGTACTTCTCAGCATTGTGTCTTATGGGGAGGAAATATTTGATGACGAACGCTTGTGTCATCCATCCTCCCAAAGC  
AGAAATATACACATTGAGCACTAATTTCTGGAGGGAGATTGAGACTCATTACTTGGAAACAGAAACGACCTACTTTTGG  
GGCAATGAGACTTTCTCGGCCATTTCAATGGAGTGTTTTATTGGTTGGGGTATGAGGAGAAAAAGGAGTTTGTGTCTT  
TCTATGACAGGCTTGGAGGAGGAAAAGAAGCAAGTATCATTTTGTGTTGACACATTTGATGAAGTTTTTACAATATGCC  
ACTTCCGGATTGTTTCTATGAGTTTCCATCTCATGAAATGTCCCTTACGGTGTGGAACGAATCCATTGCTCTTTTCGGG  
TTTTATCGTTGTGAATTTGAACCTTTGAGGTTTGGGTGATGGATGAGTTTGTGAGGTTGGACAAAACACTTATCTGTTG  
TGCCCAAAGTGGATCAGGAGGTAGATATAACCATTTGGCAATTTGGAGGAGGAACGAGGTTCTTTTGGTTGACAGAGATGG  
ACGCATATTCAGCTACAATTCGATACCGAAAAATCTGAAGTATCTCCCTGTTTCATGGTGCCTCCAGAGGAGATTTTCAG  
GCTGTTGTTTGTGTTAATAGTATAGTTTTCAGTCAA

>P\_avium\_SLFL1\_S2\_AB360340

ATGTGGGAAGAGATGGCGTTGCGCCGTATCCTACCAAGATTGCCTTCCAAATCTCTAATACGATTCAAGTGTGTTCGTA  
AATCGTGGTATAATTTGATCAACAGTCCACGTTTCGTGGAAAATCACCTGTCCAATTCATGCACAACAAACTCTCCAC  
TTGCGTCTTTTTCAATCGTTTTGTCCAGAGGGACGCTAACACTGGCGAGAAGGAACCTGGATTCTCCTTCCCTTATCTC  
CGCAATGATTATGATGATGCTGAGCATAACGTCAATTTCTTGTGAGGACATCAAATTTCCACTTTCTTCGGGACAAT  
ATATTGGGCTCGAGGTTATAGAATCGCCGTATATGGCAGCCATTGTGATGGGATAGTTTGTCTAAGTGAATCTAGTAG  
CAACCTGTTTTTATGCAATCCAGGAATCAAGGAAATCAAGCTTCTACCCAAATCATGCCCTCCAGATTGGTGGGGATGT  
GCTGTGGGGTTTGGATATGATCCCAAATCTAAAGATTACAAAGTTAGTAGAATTGCATCTTATCAGGCTGAAATTTATG  
GTGACGGTCTTATTCTCGTCCCAGAGTCAAATATACACCTCAGTACTGATTCTTGGCGAGAGATCAAGAATAATTC  
TTTAGAAACAGATACTACTTGTCTTTTTCTGATTATTTCCAGATGTACTTCCAGGGAATTTGTTATTGGGTGGGGTAT  
GAGCAACCAAACAATCTGTGGAATACGAGGATGAGGAACAGAAGCCAATGGTCATTCTCTTCGACACTGGTGTGAAA  
TATTTTCATCGTATATTTTCTGATAGTTTTTATATGTATGAGGAGGGATCATCTTATGCTTATGAAATGTCTTATAT  
TATGTATACTGATCTGCGCATTATACTGTGGAATGGATCTATTGCTCTTTTTGGCTTTAATCGTTTTAGTGCATTCCT  
GATTCTATGGAATTTGGGTGTTGGCTGACTTTGACGGTCTAAGGGTTCTTGGACAAAACACTTAACTTTTGGCCAT  
TGGTGGCCATTAAGAGGGTATTGGAATTTTGAAGAGTGACGAGATTCTTATGGTTACAGAAGATGGAGATATAGTATC

TTACAACCTTGCAACTGAGAAGCTCAAGAACATTCCCATTAATAGCCCATCTGATTTGAAACTGTTGTGTATGTGAAT  
AGTTTAGTTCCGATAACAGGAGGCAATAAGCTTGAGAGTGCAGATATA

>P\_persica\_ppa021716m\_PG6

ATGTGGGAAGAGATGGCGTTGCATCGTATCTTACCAAGATTGCCTTCAAATCTCTAATACGATTCAAATGTGTTCGTA  
AATCGTGGTATAATTTGATCGACAGTCCCACGTTTCGTGGAAAATCACCTCTCCATTTCAATGCACAAGATACACTCCAC  
TTGCGTCCTTTTCAATCGTTTTATCTACAGCGATGCTAACACGGGTGAGAAGGAACTTGCATTCTCCTTCTTTATCTC  
CGCAATGATTACGATGATGATGCTGAAAATAACGTCAATTTTGTGTTGTTGAGGACATCAAATTTCCACTTCTTCAAGAC  
AATATATTGGGCTCGGGTTATAGAATCGCTATGTATGGCAGGCCATTGTCATGGGATAGTTTGTCTAAGTGAGTCTAA  
TAGCAACCTTGTTTTTATGCAATCCAGGAATCAAGAAAATCAAACCTTCTACCCAAATCATGCCTTCCAGATTGGTGGGGA  
TGTGCTGTGGGCTTTGGATATGATCCCAAATCTAAAGATTACAAAGTTAGTAGAATTGCATCTTATCAGGCGGACATTT  
ACGGTGATGGTCTTATTCTCCTCCTAGAGTTGAAATATACACCGTCAGTACTGATTCTTGGCGAGAGATTAAGAATAA  
TTCTTTAGAAACAGAAGCTACTTTCTTTTGTCTGATTATTTTCAGATGTACTTCCAGGGAATTTGTTACTGGGTGGG  
TTTGAGCAACAAAACAATCTGTGGAATATGAGGATGAGGAACAAAAGCCAATGGTCTTTTTATTTTATACGGGTGATG  
AAATATTTTATAATATATTACTTCTGATAGTTTTTATACATATGAGGACGGATCGTCTTATGCTTATGAAATGTCTTA  
TATTATGTATACTGACCTGCGAATTATACTGTGGAATGGAGTGATTGCTCTTTTTGGCTTTAATCGTTTCAGTGCATTT  
CCTGACTCCTACGGAGTTTGGGTGTTGGATGACGGTGCTAAGGGTCTTGGACACAACACTTAACTTTTGGCCCTTG  
TGGGCATTAAGAGGGTGTGGAAATTTGGAAGAGTGACGAGATTCTGATGGTTACCGAAGATGGAGATATAGTATCTTA  
CAACCTTGCAACTGAGAAGCTTAAAAATCTTCCCAGGAATAGCTCATCTGATTTGAAACTATTGTGTATGTGAATAGC  
TTAGTTTCGATCACAGGGAGGCAACAAGCT

>P\_dulcis\_SLFd\_AB101660

ATGTGGGAAGAGATGGCATTGCGCCATATACTACCAAGATTGCCTTCAAATCTCTAATGCGATTCAAGTGTGTTCGTA  
AATCATGGTATACTTTGATCAACAATCCCACGTTTCGTGGAAAATCATCTTTCTAATTCGATGCAGAGCAAACCTGTCTAC  
CTGCGTCCTTTTCAGTCTTTTTGTCCAGAGCGACGCTAACAGTGATGAGAAGGAACTTGCATTCTCCTTGGCTTTATCTC  
CGAAATGATTATGATGATGATGAGCATAACGTCAATTTTGTGTTGTTGAGGACATCAAGTTTCCACTTCTTCCGGGACGAT  
TTATTGGGCTCGAGGATGTAGAATCTCCAAGTATTTTAGGCCATTGTAATGGGATAGTTTGTCTAAGTCTTGTAGTGA  
CAACCTTGTTTTTATGCAATCCAGCAATCAAGGAAATCAAACCTTCTACCCAAATCAGGCCCTTCCAGATTGGTGGGGATGT  
GCTGTGGGTTTGGATATGATCCCAAATCTAAAGATTACAAAGTTAGTAGAATTGCATCTTATCAGGCGGAAATGATG  
GTCTTATTCCTCCTCCTAGAGTTGAAATATACACCTCAGTACCGATTCTTGGCGAGAGATCAACAATAATCTTTAGA  
AACAGACAGTACTTGCTTTTTCCCTGATTATTTCCAGATGTACTTCCAAGGAATTTGTTATTGGGTGGGGTATGAGCAA  
CCAAAACAATCTGTGGAATACGAGGACGAGGAACAGAAGCCAATGGTCATTTTCTTCGACACTGGTGTGAAATATTTT  
ATAATCTATTTTCTGATAGTTTTTATATGTATGAGGAAGGATCATCTTATGCTTATGAAATGTCTTATCTTATGTA  
TTGTGATCTGCGCATTATACTGTGGAATGGATCTATTGCTCTTTTTGGGTTAATCGTTTTAGTGTATTTCCAGACTCC  
TATGGAGTTTGGGTGTTGGATGACTTTGACGGTGCTAAGGGTCTTGGACAAAACACTTAACTTTTGGCCATTGATGG  
GCATTAAGAGGGTATTGGAATTTGGAAGAGTGACGAGATTCTTATGGTTACCATAGATGGAGATATAGTATCGTACAA  
CCTTGACACTGAGAAGCTTAAGAATCTTCCCATGAATATCCCGTCTGATTTGAAACTATTGTACATGTGAATAGCTTA  
GTTTCGATCACAGGAGGCAACAACCTTGAGAGTGTAGATATA

>P\_dulcis\_SLFc\_AB081587

ATGTGGGAAGAGATGGCATTGCGCCATATACTACCAAGATTGCCTTCAAATCTCTAATGCGATTCAAGTGTGTTCGTA  
AATCATGGTATACTTTGATCAACAATCCCACGTTTCGTGGAAAATCATCTCTCTAATTCGATGCAGAGCAAACCTGTCTAC  
CTGCGTCCTTTTCAGTCTTTTTGTCCAGAGTGACGCTAACAGTGATGAGAAGGAACTTGCATTCTCCTTCAATTTATCTC  
CGAAATGATTATGATGATGATGAGCATAACCTCAATTTTGTGTTGTTGAGGACATCAAGTTTCCACTTCTTCCGGGACAAT  
TTATTGGCCTCGAGGATGTAGAATCTCCAAGTATTTTAGGCCATTGTAATGGGATAGTTTGTCTGAGTCTTGTAGTGA  
CAACCTTGTTTTTATGCAATCCAGCAATCAAGGAAATCAAACCTTCTACCCAAATCAGGCCCTTCCAGATTGGTGGGGATGT  
GCTGTAGGGTTTGGATATGATCCCAAATCTAAAGATTACAAAGTTAGTAGAATTGCATCTTATCAGGTGGAATGATG  
GTCTTATTCCTCCTCCTAGAGTTGAAATATACAGCCTCAGTACCGATTCTTGGAGAGAGATCAAGAATAATCTTTAGA  
AACAGATACTACTTGCTTTTTTCTGATTATTTCCAGATGTACTTCCAAGGAATTTGTTATTGGGTGGGGTATGAGCAA  
CCAAAACAATCTGTGGAATACGAGGATGAGGAACAGAAGCCAATGGTCATTTTCTTCGACACGGGTGATGAAATATTTA  
ATCATATATTTTCTGATAGTTTTTATATGTATGAGGAGGATCATCTTATGCTTATGAAATGTCTTATCTTATGTA  
TTGTGATCTGCGCATTATACTGTGGAATGGATCTATTGCTCTTTTTGGCTTTAATCGTTTTAGTGTATTTCCAGACTCC  
TATGGAGTTTGGGTATTGGATGACTTTGACGGTGCTAAGGGTCTTGGACAAAACACTTAACTTTTGGCCATTGATGG  
GCATTAAGAGGGTATTGGAATTTGGAAGAGTGACGAGATTCTTATGGTTACCGAAGATGGAGATATAGTATCTTACAA  
CCTTGCAACTCAGAAGCTTGAATACTTCCCATGAATAGCTTATCTGATTTGAAACTATTGTGTATGTGAATAGCTTA  
GTTTCGATCACAGGAGGCAACAAGCTTGAGAGTGTAGATATA

>P\_mume\_SLFL1\_Sf\_AB280956

ATGTGGGAAGAGATGGCATTGCGCCATATACTACCAAGATTGCCTTCAAATCTCTAATGCGATTCAAGTGTGTTCGTA  
AATCATGGTATAATTTGATCAACAATCCCACGTTTCGTGGAAAATCATCTCTCTAATTCGATGCAGAGCAAACCTGTCTAC  
CTGCGTCCTTTTCAGTCTTTTTGTCCAGAGCGACGCTAACAGTGATGAGAAGGAACTTGCATTCTCCTTCTTTATCTC  
CGAAATGATTATGATGATGATGAGCATAACGTCAATTTTGTGTTGTTGAGGACATCAAGTTTCCACTTCTTCCGGGACGAT

TTATTGGGCTCGAGGATGTAGAATCTCCAAGTATTTTAGGCCATTGTAATGGGATAGTTTGTCTAAGTCCTTGTAGTGA  
CAACCTTGTTTTATGCAATCCAGCAATCAAGGAAATCAAACCTTCTACCCAAATCAGGCCCTCCAGATTGGTGGGGATGT  
GCTGTGGGGTTTGGATATGATCCCAAATCTAAAGATTACAAAGTTAGTAGAATTGCATCTTATCAGGCGGAAATGATG  
GTCTTATTCCTCCTCCTAGAGTTGAAATATACAGCCTCAGTACCGATTCTTGGCGAGAGATCAAGAATAATTCTTTAGA  
AACAGATACTACTTGGCTTTTTTTCCTGATTATTTCCAAATGTACTTCCAAGGATTTTGTATTGGGTGGGGTATGAGCAA  
CCAAAACAATCTGTGGAATACGAGGATGAGGAACAGAAGCCAATGGTCATTTTCTTCGACACGGGTGATGAAATATTTT  
ATCATATATTTATGCTGATAATTTTTATATGTATGAGGAGGATCATCTTATGCGTATGAAATGTCTTATATTTATGTA  
TACTGATCTGCGCATTATACTGTGGAATGGATCTATTGCTCTTTTTGGGTTAATCGTTTTAGTGTATTTCTGACTCC  
TATGGAGTTTGGGTGTTGGATGACTTTGACGGTGCTAAGGGTCTTGGACAAAACACTTAACTTTTGAGCCATTGATGG  
GCATTAAGAGGGTATTGGAATTTTGAAGAGCGACGAGATTCTTATGGTTACAGAAGAAGATGGATCTATAGTATCGTA  
CAACCTTGAAACTGAGACGCTTAAGAATGTTCCCATGAATAGCCCATCTGATTTTCGAAACTATTTTGTATGTGAATAGC  
TTAGTTCCAATCACAGGCGGCAACAAGCTTGGGAGTGTAGATATG

>P\_persica\_ppa016317m\_PG6

ATGTCTGAAGAGATGGTGTTCATATCCTATCAAGATTGCCTTCAAATCTCTAATGCGATTCAAGTGTGTCCGTAAT  
CGTGGTATACTATGATCAACGATCCCATGTTTTGTAGAAAGGCACCTCTCCAATTCCATGCACAACAAACGCTCCACTAG  
TTGCATCCTTGTCAATCGTTTTCTCCACAGCGACACTAGCACTGGTGAGAAAGAACTTGGATTCTCCTTCTTTATTTT  
TGCAATGATTATGACGATGATGAGCATAAAGTCAATTCTTTTGTGAGGACATCAAATTTCCATTTTCTTCAGGAGGAC  
AACGTAGTGGGTTTGGGTTATAGAATCTCTAAGTATGATAGGCCAGTGTGATGGGATAGTTTGTTTATGTGACCGTCCG  
TGACAACATTTGTTTTATGCAATCCAGCAATCAAGGAACTCAAGCTTCTTCCCAAATCATGCCTTCCACAGTTGATCCAG  
TGTGCTGTGGGGTTTGGATACGATCCCAAATCAAAGATTACAAAATTCATAGAATTTTCATGTGATGGTGAGGAAATTT  
ATGATCAGCGTCTTGTTTTTTTCCCTCCTAGAGTTGAAATATACACCCTCACTACTGATTCCTGGCGAGAGATCAAGAA  
TAATTATTTAGAAACAGAGAACACTTTCTTTTGGCCTGAATATTTTCGAGATGTACTGGAAAGGAATATGTTATTGGTTG  
GGGTATGAGCAACCAAAGAATTCGAGTCTTACTTTGATAGACTCGAGGATGAGAAAAAGAAGACAATGATATTTTTGT  
TTGACACCGGTGATGAGGTATCTCATAACATATTACTTCCAGATTGTTTATATGAGGCAGCGGTATATCGTTTTGACAT  
GCGCATTTCTGTGGAATGAATCTGTTGCTTTGTTTGGCCTAGATAGTTTTGGTACATTTGTTGAATGCTATGGATTA  
TGGGTGTTGGATGACTTTGACGGTGCTAAGGGTCTTGGACTAGACACTGCACTTTTGGAGTCCGTGATAGACATTA  
GGGTATTTGGCATTTTGAATAATGACGAGATTCTTCTGGTTGACGGATGTGGGAATATAGTATCCTACAACCTTGGTAC  
CAATAACCACAAAATCTTTTAATATATACTGAGAATCTATGTCGTGTGAAACTATTTGTATATGTGAATACTTTAGTT  
CCGATCATGGGAGGCAACAAGCTTGGAGTGTAGATAAG

>P\_persica\_ppa019333m\_PG6

ATGGCAGATCCAATCTTTTTCAAATTTGTCAGAAGAGCTGGTGACGCATATCCTGTCAAGGCTGCCTCCCAAATCTCTCC  
TGCGATTCAAATGCATTCGCAAGTCGTGGTCTGTTTTGATTACTACCCCTCAGTTTGTAGAAATGCACCTCTCCAACCT  
CAGTTCACCCGACACCAAATCTCCACCCCTCCACCACCATCCTTTTCAAGCATTATATCCTCACAGACCTCAACACA  
GACCAAAGGAACTCCTTTTCTCGATGTTAATCTCCGCACTGATGATGTTGACAATGATGATATGGACGGTGGCGATG  
ATCACCTCCGTCCCGTTTTTCGAGGACCTCGAAGTTTCTTGTTCGAGGTGTAGACACAGGGGGAGAGTTTTATAGGGT  
TGGCGTGGACATTTCAAGCCATTGTGATGGGATCGTTTTGTCTGACTGATTTCCACAAAAGGTGGCCTTATGCAACCCG  
GCCATTAGAGAATTCAAGCTTCTTCTGAATCAGACGTTCTTCTTTCTTCCCTGAAGAAGTCGCCATACTTGGGGTAG  
GGTTGGGGCGTGATCTCAAGCATTCGAAGATTATAAAGTCGTCCGGCTTGTGACTTATGGAGACAAAAAAGTCGACGA  
CGATCGTTTTGTTGTTTATCCTCCGAGAGCAGAAGTGTTCACCTGCAGGGTTCAGATTCGTGGAAAGAGATCGAGATC  
GGGAACATAGTGACGAAAACCGGATTTCTTTTGCCTCAGCATGCTGTGTCTGTGTACTGCAAGGGTGTGTTTATTGGC  
CTGCAACAGATAAGGACAGGGAGTACGTCGTCAGCTATAATTATACAGACGATGAGTATGATTACTGCGAGGAAAACGA  
GGCGAAGACGAGGAAGACAACCTGAAAACAACGAGCGGCGGGCAGGGAGGAGGAGGAGGAAGGAAAGGGACATG  
AAAGCAGGAATTTCTTTCGTTGACTTTGGTGAAGAGGTGTTTGTATTTATACCGTATCTTCCCGATGTAGGGTATTATG  
AGAGCAAGATTTTGGGGTGTGGAAGGAAAGCGTTGCTATATTTATTTATGCGTCAATGCCAGATTGCTTTGACATATG  
GGTATGGATGAGAGTGGGGAGAAGGGTTCTTGGACAAAATACTTAACCTTTGAGCCGAAAAGCCATTGTTCCCGTTG  
CGCTTGTGGAAGAGCGAGGAAGTTGTTATGGTGGCCAGGGATGATGTTGTGCTAATTTTCTACAACCTTGAAACCAGAA  
AGTTTAAGTATCTTCTTAAATGGTGTGTTTTTTGATCGAACTGAAGCTGTTGTTTGTGCCAGCACTTTGGTTTCGAT  
CCAGGGAGACAAAACAACACTCAG

>P\_persica\_ppa025849m\_PG6

ATGGCAACGTTGAGCAAATTTTCTGAAGATATGATGGGGAATATCCTGTGCGAGACTGCCTCCCAAGTCTCTGATGCGAT  
TTAGATGCGTCTCAAGTCGTGGCATGACCTAATCGATAAACCTAGCTTCGTGGACCAGCACCTTTCCACTTCTATGGA  
CAACAAAGTCACCTCCTCCACTTGCCTCCTCCTCAAGCACAATGTCCTCACGGACCCACCATTAAAGGACGACGAGAAG  
GCAGTTAGAGCTACTCTTCAACCCCGACAGTAACCAAAGGACATTTTACTCTCCTCGTTAATCTCGGCAGCCTTG  
TCGACGACGGTCTTGGATTGAGAACCATGTCGTTCCGCCGCTATGAGAGGATACGCATTGAGCCTAGAAATTTGAGG  
CTCTTGTGATGGCCTCATCTGCCCTCAATACTTTTAAACAGCGAGGACATTGTTTTATGCAATCCAGCACTCGAGGAATAC  
AGAGTTCTTCCCAAGTCTTGCAATCTTTTGCCTCCGCGAGTTCCACGACAAGTTGAAGAAAATGAAGACGATGATTTT  
ATGAAGAAGATGACGATGACGAGATAGAATCGAACCCGAAATGTGTGGGGTTTCGGGTACGATCCGAATTCGAAAGACTA  
CAAAGTTGTTGAGCTGCACAATTTGTCTCCGGGGTTTTTACCAGCACCCCTCCAAAGTAGAGGTTTTACAGCTTGGCT

GCCGATACTTGGAGAGAGATCCCTGTTGACATCCAGCCTCATGGTTCTCTAAACCCGTCTTACCAGATGTACTTCAATG  
GATTCTTTTACTGGATCGCGTACTGGACGGAGGAAAGAAATGTCATCCTTTTCGTTTGACATGAGCGAGGAGGTGTTTCA  
TGACATAGCTCTTCCGGAGAGTGGCCAGATGCATATGAATACACAAGCATTGCAGTGTGGAAAGACTCTCTGGTTCTC  
TTGACCTCCCCGGTGGAAAACGAAGCTCCTAAAACCTTAGACTTGTGGGTCTTGGATGAAGAGTTGAAAGGTGCTAAGG  
GTTTTGTGGACAAAGCACTTGGCTATAGGACCTCTGGCAAAGGGGTTGAGGCTCCATTGGTGTTTTGGAAAGATGAGGA  
GCTTCTTATGGTTACGACTAATGGGGATGTGGTAAACTATAGCCTTGATACACAAATGCTCAAGCATGTCCCCCGCCAT  
GGATTGGGAGAGCCAACCAATATCCAAGCGGTTTCCTTACGTGAATAGTATTGTTTTCAATTAAGCCAGGCAACAAGATTG  
AAAGCATA

>P\_mume\_SLFL2\_AB280957

ATGATGAGAGAAATGGCAACGTTGAGCAAATTTTCTGAAGATATGATGGGGAATATCCTGTGCGAGACTGCCTCCCAAGT  
CTCTGATGCGATTTAGATGCGTCCCTCAAGTCGTGGCATGATCTAATCGATAAACCTAGCTTTCGTGGACCACCACCTTTC  
CATTTCTATGGACAACAAAGTCACCTCCTCCACTTACGTCTCCTCAAGCACAATGTCCCTCACGGACCCCAGCATTAAG  
GACGACGAGAAGGCAGTTAGAGCTACTCTCTTCAACCCCGACAGTAACCAAAGGGACATTTTACTCTCCTCACTTAATC  
TCGGCAGCCTTGTGCGACGACGGTCTTGAGATTGAGAACCATGTCGTTCCGCAGCCTATGAGAGGATACGCATTGAGCCT  
AGAAATTTTACGGCTCTTGTGATGGCCTCATCTGCCTCAATACTTTTAAACAGCGAGGACATTGTTTTATGCAATCCAGCA  
CTCGAGGAATATAGAGTTCTTCCCAAGTCTTGTATTCTTTTGCCTCCGCGAGTTCCACGTCAATTTGAAGAAAAATGAAG  
ACGATGATTATTATGAAGAAGACGAAGACGATGAGATAGAATCGAACCCAAAATGTGTGGGGTTCGGGTACGATCCGAA  
CTCGAAAGACTACAAAGTTGTTTCGAGCTGCACAATTTGTCTCTGGGGTTTTTACCAGCACCCCTCCAAAGTAGAGGTT  
TACAGCTTGGCTGCCGATACTTGGAGAGAGGTCCCTGTTGACATCCAGCCTCATGGCTCTCTAAACCCGTCTTACCAGA  
TGTACTTCAAGGGATTCTTTTACTGGATCGCGTACTGGACGGAAGAAAGAAATGTCATCCTTTTCGTTTGACATGAGCGA  
GGAGGTGTTTCATGACATAGCTCTTCCGGAGAGTGGCCAGATGCATATGAATACACAAGCATTGCAGTGTGGAAAGAC  
TCTCTGGTTCTCTTGACCTACCCGGTGGAAAACGAAGCTCCTAAAACCTTAGACTTGTGGGTCTTGGATGAAGACTTGA  
AAGGTGCTACTAAGGGTTTTGTGGAAAAGCACTTGGCTATAGGACCTCTGGAAAAAGGGGTTGAGGCTCCATTGGTGT  
TTGGAAAGATGAGGAGCTTCTTATGGTTACGACTAATGGGGATGTGGTAAACTATAGCCTTGATACACAAAAGCTCAAG  
CATGTCCCCCGCCATGGATTGGGAGAGCCAACCAATATCCAAGCGGTTTCCTTACGTGAATAGTATTGTTTTCAATTAAGC  
CAGGCAACAAGATTGAAAGCATA

>P\_persica\_ppa016207m\_PG6

ATGCCAGAAGAAATGGTGGTGCAGATCTTGTCAAGGCTTCCTCCGAAATCTCTAATGCGATTCAGATGCGTTCATAAAT  
CGTGGTACAATTTTATCAATGACCCCAACTTTGTGGATGTCCACCTCTCCAAATCCATAGACAACAGATTTTTCATCCAA  
GACCTCAACTTGTGTCTCTTCAAGCGTTGTGTCTCAACAATGAAGCAAATCATATTTTGTGTCACTTGTGATCTT  
AGCAATGACAACGATGATGTTCAAATTTCAATCTAATTTCTATCCGAGACCTCAACCTTAATAATGTTCTCTCCACTTCTG  
TAGGGCTAAGGCACGACTGTTTGGACATTGCAGGCCATTGCCATGGGATTATTTGTCTAACTGATTTCTCTGAGAAATGT  
TTTTCTATGCAACCCAGCTCTAAAGCAACTCAAGCTTCTTCCCAAGTCATGCCTTCGTCTACCTCAACCTCCCCGAAT  
ACCTTGAACAGATTGCAGTCGACAGGGGTAGCTGTGGGATTTGGCTACGACAGCAGAGCCAGGGTTTACAAAGTTGTTT  
GAATCGTAATGCATTTTGGAGGGTTTTGGATCTTGTCTTCCCTCACATGGCAGAGGTAATAACCATGAGCTCTAACTC  
TTGGAGAGAGATCAAGACTGATATACCAAGCACTGTGGTTGGTTCATCTTCTTCCCAAATCTACTTCAAGGGTGT  
TACTATTGGTTTTGCCTTGGAGCTGGACAAGGAAACCCTAGACGAAAACAAGAAAGTCATGCTCTCCTTTGACATGGACG  
ATGAGTTATTTTCCATACGCCGGTGGCGGATAGTTTACAAGATTCAGAAGAAAACATATGGAAGCCTTGGAGTGTGGAA  
TGAATCCATTGCTCTTTTTTCTTATCACGTAGAAAAGTGGGGTTTTCTAAATTCATAGACATATGGGTGATGGATGGTTTT  
TGTGGTACCAAGGGTTGTTGGACAAAGCACTTAACCATCGAACCTATAGCAGGCATTGGGATGCCGTTGACATTTTGGAA  
ACAGTGATGAGCTTCTTCTAGTTGCCACAGATGGATATGTAGTTTCCACAATTTGATACAAAAGTGCCTTAGAAAATCT  
TCCTATTCATGGTGTGCTTTTTGAACATTTTCAAGCTGTGCTTTATACAAGTAGCCTCATTTCAGTTAAT

>P\_aviumSFB3\_AY571665

ATGACATTCACATTACGTAAGAACGAGATCTTAATCGACATCCTAGTAAGACTACCTGCAAAATCCCTCATTCGGTTTC  
TATGTACATGCAAGTCGTGGAGTGATTTGATTGGCAGCTCAAGTTTTGTTTCGCACACACCTTCATAGGAATGTCACAAA  
ACATGCTCATGTCTATCTACTTTGCCTTACCACCCACAATTTGAACGTCAGAACGACAATGATGACCCATATGATATA  
GAAGAACTTCAGTGGTCACTTTTTTCCAATGAAAAGTTTTGAGCAGTTCTCCAATTTAAGCCATCCTTTAGAAAACACAG  
AGCATTTTAGAATATATGGTTCAAGCAATGGTTTTAGTTGCATGTCGGATGAGATATTGAATTTTCGATAGTCCATATACA  
AATATGGAACCCATCGGTTAGGAAATTCAGGACTCTTCCAATGAGCACCACATTAACATGAAATTTTCCCATGTTTCT  
CTCCAATTTGGGTTCCACCCCGGGTTAATGACTACAAGGCTGTAAGGATGATGCATACCAACAAAGGTGCCCTGGCAG  
TTGAGGTTTATAGTCTTAAAACAGATTGTTGGAAGATGATTGAAGTAATTCCTCCTTGGTTAAAATGCACTTGAAGCA  
TCATAAGGGTACATTTTTTAAATGGAGTAGCATAACCACATCATGAGAAAGGTCCTATATGCAGCATTATGTCATTGAT  
TCAGGCAGCGAAAAATTCGAAGAATTCATAACACCAGATGCCATTTGCAGTCCACGGGAGTTATGCATTGACGTCTACA  
AGGAACATAATTTGCTTGATTTTTGATTTTTATGGTTGTGATGAGGAGGGCATGGACAAAAGTTGACTTGTGGGTTCTGCA  
GGAAAACGGTGGAAACAATTTGTGTCTTTTTATTTTTTCTTTGAATCATTGTCATCGTACAATCGGGATTAGTATAGAT  
AATGAACTCATAATGCAAGAAGAGATTTTCAATTAAGGAGTAGCATATCTGTATTTGTGTAATTACGAATCCAAGCAAG  
TTCTTGAAACAGGAATTCAAATGGCCGTCATGAGATATGGCGAAATCGAATTCCTTGTGTTGCAATTACTTACACAGAAAG  
TTTTGGTTTTGCTCAATAATTAT

>A\_thaliana\_F\_box\_AT3G06240\_NM111499

ATGAAAGCGATCCAGTTGCTGTGGGAAGCGATAATGGAGGCGACGAAGAGAGAAAAGACGGAGAGAAGATGACGACGGCG  
AAAAAGCTTCACCGGAATCACTCGTTCCTCCACCAGAGATCATTACAGAAATTCCTTCTCCGATTACCAGCCAAATCGAT  
CGGGCGATTCAGGTGCGTATCAAAGCTCTTTTGCACCTTATCGTCAGATCCAGGGTTCGCGAAGATTACCTCGATCTG  
ATCCTTCGAAACGAATCCGTAAGATCGCTCCACCCTAAGCTCATTGTGTCTTCACATAATCTGTACTCGTTAGATTTCA  
ATTTCGATCGGTGACGGAATTAGGGATTTAGCGGCTGTGGAACACAATTATCCTCTTAAAGACGATCCAAGCATTTCCTC  
TGAGATGATTAGGAATTACGTGGGGGACCATCTGTACGATGATCGTCGCGTGATGCTTAAGCTGAATGCGAAATCGTAT  
CGAAGAAACTGGGTTGAGATCGTTGGATCTTCCAATGGTTTAGTGTGTATCTCTCCTGGTGAAGGAGCTGTTTTCTTGT  
ATAATCCAACCTACCGGAGATTCCAAGAGATTACCTGAAAATTTTCGTCCCAAATCTGTAGAATACGAAAGAGATAATTT  
CCAAACTTATGGATTTGGTTTTGATGGTCTCACTGATGATTACAAATTTGGTGAAGCTTGTGCTACCAGTGAAGATATT  
CTCGATGCTAGTGTCTATTCTTGAAGGCTGACTCATGGAGACGGATCTGCAATTTGAATTATGAGCACAACGATGGCT  
CCTACACGTCCGGTGTGCATTTCAACGGTGCGATTCACTGGGTGTTTACAGAGAGTAGGCACAACCAAAGAGTGGTTGT  
AGCATTTGATATTCAAACCGAGGAGTTTCGAGAGATGCCAGTGCCTGATGAAGCTGAAGATTGTTCCCATAGGTTTAGC  
AACTTTGTGGTCGGAAGTCTCAATGGACGTCTCTGTGTGGTCAATAGTTGCTACGATGTGCATGATGATATATGGGTGA  
TGAGTGAGTACGGTGAAGCTAAATCCTGGAGCAGAATTCGAATCAACTTGTTGTATAGGTCGATGAAACCGCTCTGTTT  
GACTAAGAACGATGAAGAGGTTCTTCTGGAGCTTGATGGAGACCTGGTGTGTACAACTTTGAAACCAATGCATCGAGT  
AATCTAGGAATTTGTGGGGTTAAGCTCAGTGACGGGTTTCGAGGCAAATACATACGTAGAGAGCCTCATATCACCCAAC  
CTTATGGTATAGAGAGC
