# Supplementary material for: The identification of the Rosa S-locus and implications on the evolution of the Rosaceae gametophytic self-incompatibility systems
Source: PubMed Central journal article supplement (PMC7881130; doi:10.1038/s41598-021-83243-8), 2021-02-12
Supplement: 41598_2021_83243_MOESM4_ESM.pdf [file 41598_2021_83243_MOESM4_ESM.pdf]

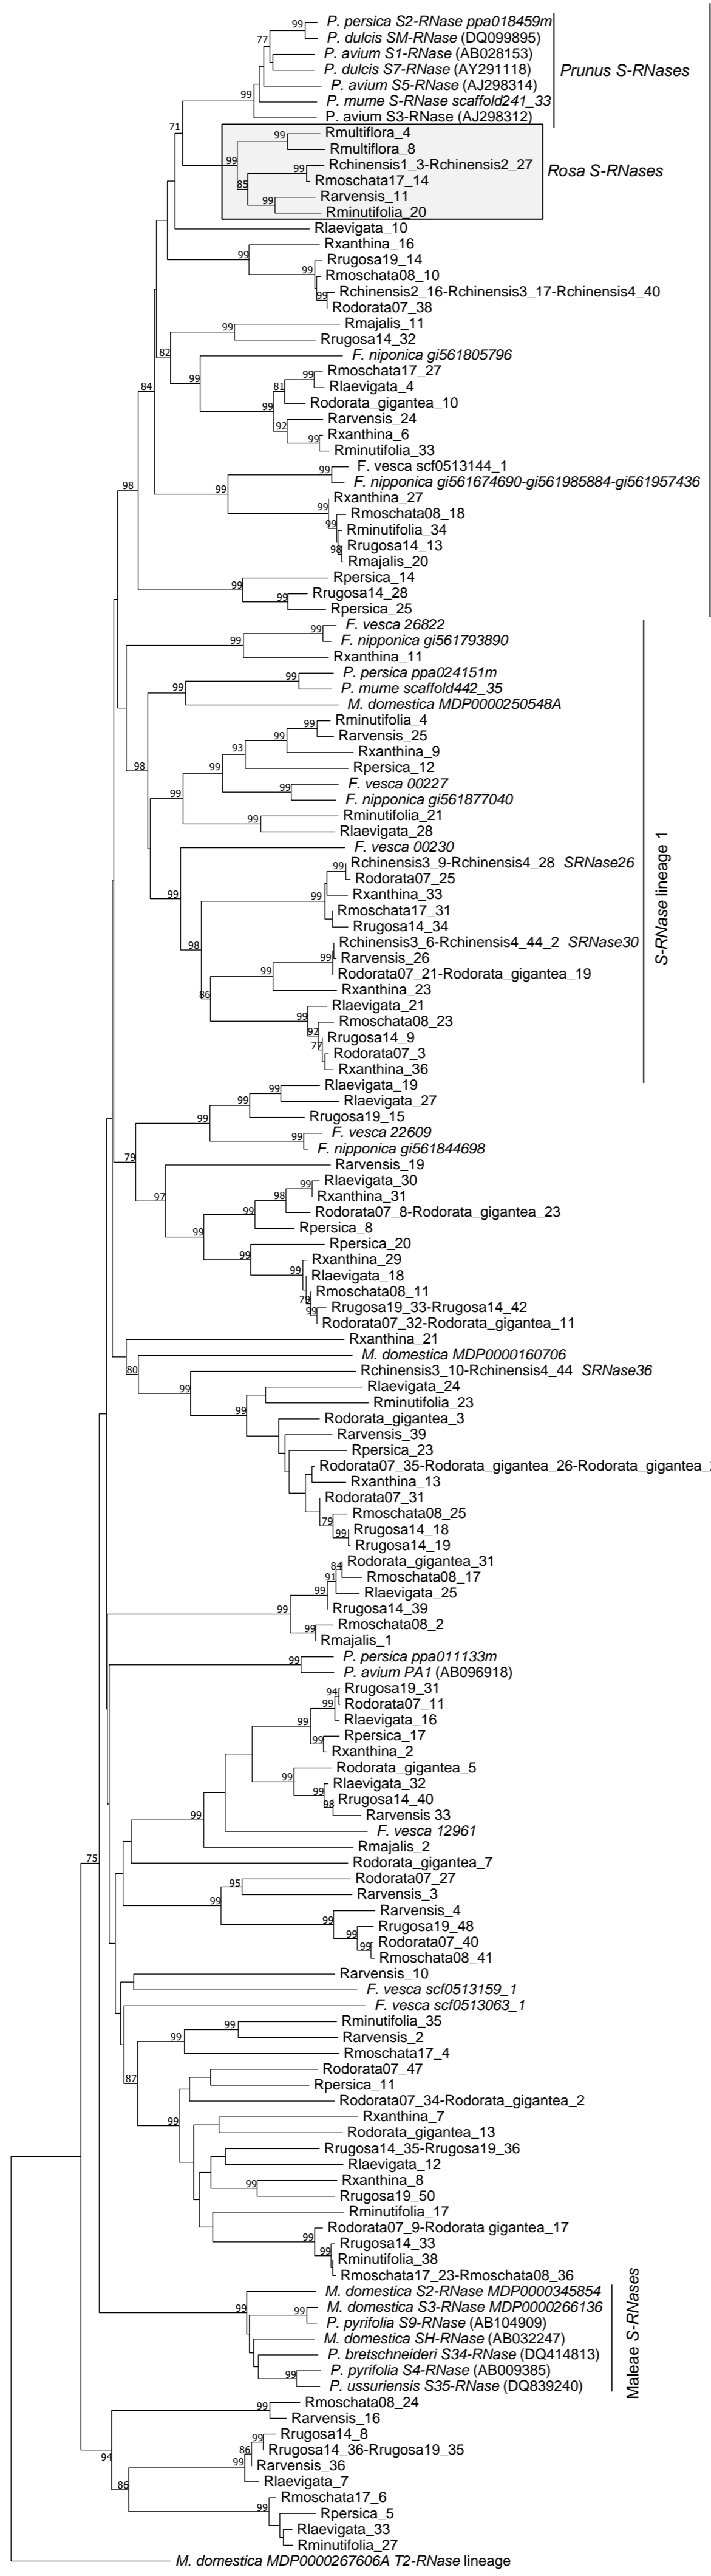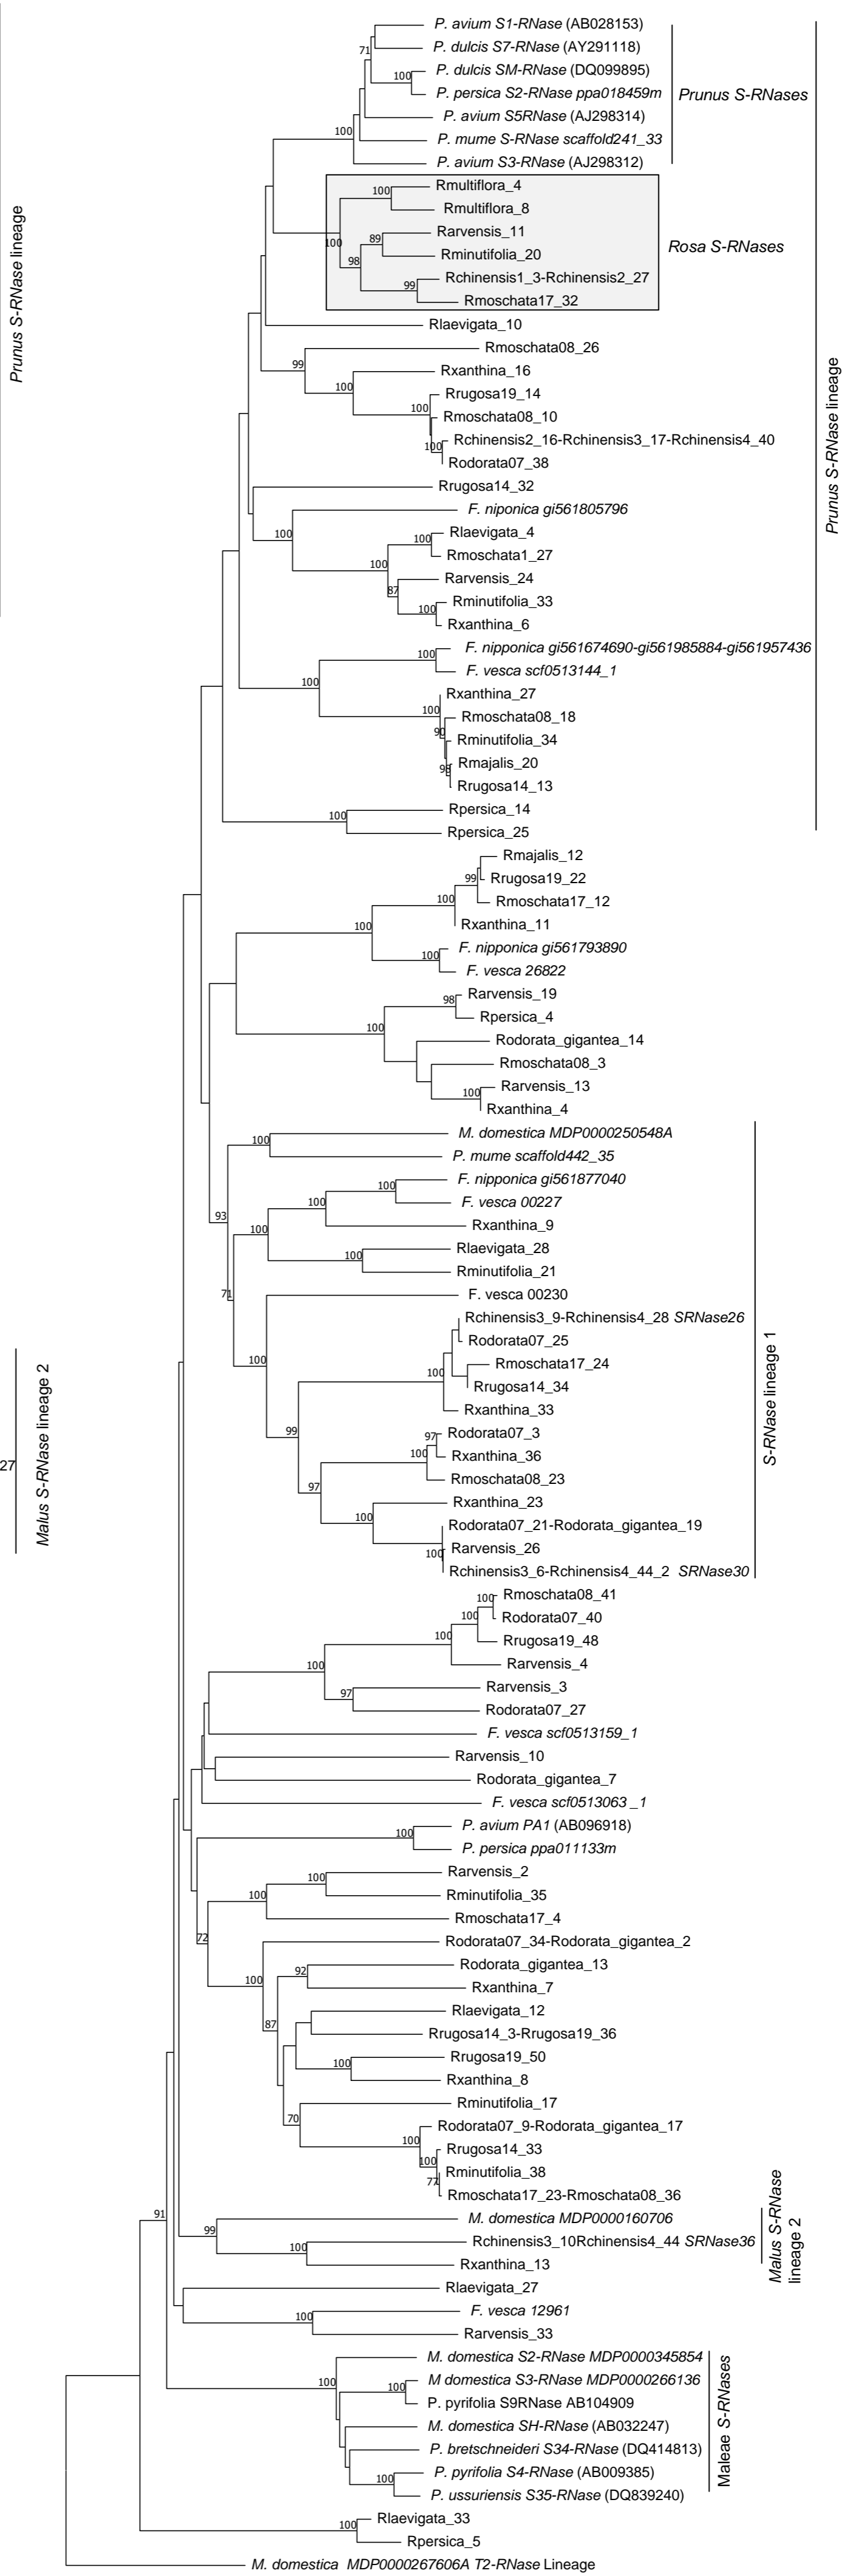

A

B

Sup. Fig. 1
